# Supplementary material for: Whole Genome Sequencing and Analysis of Plant Growth Promoting Bacteria Isolated from the Rhizosphere of Plantation Crops Coconut, Cocoa and Arecanut
Source: PLoS One. 2014 Aug 27;9(8):e104259. doi: 10.1371/journal.pone.0104259 (PMC4146471; doi:10.1371/journal.pone.0104259)
Supplement: Table S4 — Genomic properties of Pseudomonadeceae family. (XLSX) [file pone.0104259.s010.xlsx]

## Sheet: Supplementary Tables
Supplementary Tables
Table S1	Isolation details of PGPR isolates
Table S2	Biological properties of PGCPRs (CPCRI-1, CPCRI-2, CPCRI-3)
Table S3	Genomic properties of Enterobacteriaceae family
Table S4	Genomic properties of Pseudomonadeceae family
Table S5A	Predicted protein-coding genes in CPCRI-1
Table S5B	Predicted protein-coding genes in CPCRI-2
Table S5C	Predicted protein-coding genes in CPCRI-3
Table S6A	Predicted tRNA genes in CPCRI-1 genome
Table S6B	Predicted tRNA genes in CPCRI-2 genome
Table S6C	Predicted tRNA genes in CPCRI-3 genome
Table S7	Predicted rRNA genes in CPCRI-1, CPCRI-2, CPCRI-3 genome
Table S8A	CPCRI-1 protein coding genes annotation
Table S8B	CPCRI-2 protein coding genes annotation
Table S8C	CPCRI-3 protein coding genes annotation
Table S9	Pairwise comparison of CPCRI-1, CPCRI-2, and CPCRI-3 genomes against bacteria genomes using progressive Mauve aligner. % sequence similarity/genome coverage in the conserved block is shown.
Table S10	List of GO terms identified in the bacteria genomes
Table S11	Propionate metabolism pathway genes in CPCRI-1, CPCRI-2 and CPCRI-3 genomes
Table S12A	SEED comparison summary for CPCRI-1,3 vs non-PGPRs (Enterobacter cloacae EcWSU1, Enterobacter cloacae subsp cloacae ATCC 13047)
Table S12B	KEGG comparison summary for CPCRI-1,3 vs non-PGPRs (Enterobacter cloacae EcWSU1, Enterobacter cloacae subsp cloacae ATCC 13047)
Table S12C	SEED comparison summary for CPCRI-3 vs non-PGPRs (Pseudomonas putida S16)
Table S12D	SEED comparison summary for CPCRI-3 vs non-PGPRs (Pseudomonas putida S16)
Table S12E	GO comparison summary of CPCRI-1 vs Enterobacter cloacae EcWSU1 (a non-PGPR)
Table S12F	GO comparison summary of CPCRI-1 vs Enterobacter cloacae subsp cloacae ATCC 13047(a non-PGPR)
Table S12G	GO comparison summary of CPCRI-2 vs Pseudomonas putida strain S16 (a non-PGPR)
Table S12H	GO comparison summary of CPCRI-3 vs Enterobacter cloacae EcWSU1 (a non-PGPR)
Table S12I	GO comparison summary of CPCRI-3 vs Enterobacter cloacae subsp cloacae ATCC 13047(a non-PGPR)
Table S13	Bacteria secretion system KEGG pathway gene in CPCRI-1, CPCRI-2 and CPCRI-3 genomes

## Sheet: Table S4
Table S4. Genomic properties of Pseudomonadeaceae family
Species	Genome Size (bp)	GC Content (%)	# of protein-coding genes
Pseudomonas putida BIRD-1	5731541	61.7	4960
Pseudomonas putida F1	5959964	61.9	5252
Pseudomonas putida GB-1	6078430	61.9	5409
Pseudomonas putida KT2440	6181863	61.5	5350
Pseudomonas putida S16	5984790	62.3	5218
Pseudomonas putida W619	5774330	61.4	5182
Pseudomonas aeruginosa LESB58	6601757	66.3	5925
Pseudomonas fluorescens F113	6845832	60.8	5862
Pseudomonas syringae pv tomato str DC3000	6397126	58.4	5614
Pseudomonas aeruginosa NCGM2.S1	6764661	66.1	6269
Pseudomonas aeruginosa PAO1	6264404	66.5	5566
Pseudomonas fulva 12-X	4920769	63.5	4461
Pseudomonas aeruginosa PA7	6588339	66.4	6286
Pseudomonas syringae pv phaseolicola 1448A	5928787	58	5172
Pseudomonas entomophila L48	5888780	64.2	5134
Pseudomonas mendocina ymp	5072807	64.7	4594
Pseudomonas aeruginosa M18	6327754	66.5	5684
Pseudomonas brassicacearum subsp. brassicacearum NFM421	6843248	60.8	6095
Pseudomonas mendocina NK-01	5434353	62.5	4958
Pseudomonas stutzeri ATCC 17588 = LMG 11199	4547930	63.9	4217
Pseudomonas stutzeri DSM 4166	4689946	64	4303
Pseudomonas aeruginosa UCBPP-PA14	6537648	66.3	5892
Pseudomonas fluorescens Pf0-1	6438405	61	5736
Pseudomonas fluorescens SBW25	6722539	63.9	6395
Pseudomonas fluorescens Pf-5	7074893	63.3	6138
Pseudomonas stutzeri A1501	4567418	63.9	4128
Pseudomonas syringae pv. syringae B728a	6093698	59.2	5089
Average	6009704	63	5366
