# Supplementary material for: Whole Genome Sequencing and Analysis of Plant Growth Promoting Bacteria Isolated from the Rhizosphere of Plantation Crops Coconut, Cocoa and Arecanut
Source: PLoS One. 2014 Aug 27;9(8):e104259. doi: 10.1371/journal.pone.0104259 (PMC4146471; doi:10.1371/journal.pone.0104259)
Supplement: Table S7 — Predicted rRNA genes in CPCRI-1, CPCRI-2, CPCRI-3 genome. (XLSX) [file pone.0104259.s013.xlsx]

## Sheet: Supplementary Tables
Supplementary Tables
Table S1	Isolation details of PGPR isolates
Table S2	Biological properties of PGCPRs (CPCRI-1, CPCRI-2, CPCRI-3)
Table S3	Genomic properties of Enterobacteriaceae family
Table S4	Genomic properties of Pseudomonadeceae family
Table S5A	Predicted protein-coding genes in CPCRI-1
Table S5B	Predicted protein-coding genes in CPCRI-2
Table S5C	Predicted protein-coding genes in CPCRI-3
Table S6A	Predicted tRNA genes in CPCRI-1 genome
Table S6B	Predicted tRNA genes in CPCRI-2 genome
Table S6C	Predicted tRNA genes in CPCRI-3 genome
Table S7	Predicted rRNA genes in CPCRI-1, CPCRI-2, CPCRI-3 genome
Table S8A	CPCRI-1 protein coding genes annotation
Table S8B	CPCRI-2 protein coding genes annotation
Table S8C	CPCRI-3 protein coding genes annotation
Table S9	Pairwise comparison of CPCRI-1, CPCRI-2, and CPCRI-3 genomes against bacteria genomes using progressive Mauve aligner. % sequence similarity/genome coverage in the conserved block is shown.
Table S10	List of GO terms identified in the bacteria genomes
Table S11	Propionate metabolism pathway genes in CPCRI-1, CPCRI-2 and CPCRI-3 genomes
Table S12A	SEED comparison summary for CPCRI-1,3 vs non-PGPRs (Enterobacter cloacae EcWSU1, Enterobacter cloacae subsp cloacae ATCC 13047)
Table S12B	KEGG comparison summary for CPCRI-1,3 vs non-PGPRs (Enterobacter cloacae EcWSU1, Enterobacter cloacae subsp cloacae ATCC 13047)
Table S12C	SEED comparison summary for CPCRI-3 vs non-PGPRs (Pseudomonas putida S16)
Table S12D	SEED comparison summary for CPCRI-3 vs non-PGPRs (Pseudomonas putida S16)
Table S12E	GO comparison summary of CPCRI-1 vs Enterobacter cloacae EcWSU1 (a non-PGPR)
Table S12F	GO comparison summary of CPCRI-1 vs Enterobacter cloacae subsp cloacae ATCC 13047(a non-PGPR)
Table S12G	GO comparison summary of CPCRI-2 vs Pseudomonas putida strain S16 (a non-PGPR)
Table S12H	GO comparison summary of CPCRI-3 vs Enterobacter cloacae EcWSU1 (a non-PGPR)
Table S12I	GO comparison summary of CPCRI-3 vs Enterobacter cloacae subsp cloacae ATCC 13047(a non-PGPR)
Table S13	Bacteria secretion system KEGG pathway gene in CPCRI-1, CPCRI-2 and CPCRI-3 genomes

## Sheet: Table S7
Table S7. Predicted rRNA genes in CPCRI-1, CPCRI-2, CPCRI-3 genome
Bacteria	Contig number	Start	End	BLASTN E-value	Strand	Type
CPCRI-1	Contig00014	50	171	5e-55	+	5S_rRNA
	Contig00014	320	420	8e-51	+	5S_rRNA
	Contig00030	13	2916	0	-	23S_rRNA
	Contig00031	50	1590	0	-	16S_rRNA
	Contig00045	6	127	9e-58	-	5S_rRNA
CPCRI-2	Contig00074	30	149	5e-57	+	5S_rRNA
	Contig00074	255	371	1e-57	+	5S_rRNA
	Contig00088	203	3076	0	+	23S_rRNA
	Contig00091	54	1578	0	-	16S_rRNA
	Contig00099	497	616	3e-58	-	5S_rRNA
	Contig00121	30	149	5e-59	+	5S_rRNA
CPCRI-3	Contig00009	118	237	6e-56	+	5S_rRNA
	Contig00043	76	1606	0	+	16S_rRNA
	Contig00044	180	1591	0	-	23S_rRNA
	Contig00045	108	1276	0	+	23S_rRNA
	Contig00049	1	339	8e-180	-	23S_rRNA
	Contig00050	4	337	0	-	23S_rRNA
