# Supplementary material for: Whole Genome Sequencing and Analysis of Plant Growth Promoting Bacteria Isolated from the Rhizosphere of Plantation Crops Coconut, Cocoa and Arecanut
Source: PLoS One. 2014 Aug 27;9(8):e104259. doi: 10.1371/journal.pone.0104259 (PMC4146471; doi:10.1371/journal.pone.0104259)
Supplement: Table S12 — A. SEED comparison summary for CPCRI-1, 3 vs non-PGPRs (Enterobacter cloacae EcWSU1, Enterobacter cloacae subsp. cloacae ATCC 13047). B. KEGG comparison summary for CPCRI-1, 3 vs non-PGPRs (Enterobacter cloacae EcWSU1, Enterobacter cloacae subsp. cloacae ATCC 13047). C. SEED comparison summary for CPCRI-2 vs non-PGPRs (Pseudomonas putida S16). D. KEGG comparison summary for CPCRI-2 vs non-PGPRs (Pseudomonas putida S16) E. GO comparison summary of CPCRI-1 vs Enterobacter cloacae EcWSU1 (a non-PGPR). F. GO comparison summary of CPCRI-1 vs Enterobacter cloacae subsp. cloacae ATCC 13047 (a non-PGPR). G. GO comparison summary of CPCRI-2 vs Pseudomonas putida strain S16 (a non-PGPR). H. GO comparison summary of CPCRI-3 vs Enterobacter cloacae EcWSU1 (a non-PGPR). I. GO comparison summary of CPCRI-3 vs Enterobacter cloacae subsp. cloacae ATCC 13047 (a non-PGPR). (XLSX) [file pone.0104259.s018.xlsx]

## Sheet: Supplementary Tables
Supplementary Tables
Table S1	Isolation details of PGPR isolates
Table S2	Biological properties of PGCPRs (CPCRI-1, CPCRI-2, CPCRI-3)
Table S3	Genomic properties of Enterobacteriaceae family
Table S4	Genomic properties of Pseudomonadeceae family
Table S5A	Predicted protein-coding genes in CPCRI-1
Table S5B	Predicted protein-coding genes in CPCRI-2
Table S5C	Predicted protein-coding genes in CPCRI-3
Table S6A	Predicted tRNA genes in CPCRI-1 genome
Table S6B	Predicted tRNA genes in CPCRI-2 genome
Table S6C	Predicted tRNA genes in CPCRI-3 genome
Table S7	Predicted rRNA genes in CPCRI-1, CPCRI-2, CPCRI-3 genome
Table S8A	CPCRI-1 protein coding genes annotation
Table S8B	CPCRI-2 protein coding genes annotation
Table S8C	CPCRI-3 protein coding genes annotation
Table S9	Pairwise comparison of CPCRI-1, CPCRI-2, and CPCRI-3 genomes against bacteria genomes using progressive Mauve aligner. % sequence similarity/genome coverage in the conserved block is shown.
Table S10	List of GO terms identified in the bacteria genomes
Table S11	Propionate metabolism pathway genes in CPCRI-1, CPCRI-2 and CPCRI-3 genomes
Table S12A	SEED comparison summary for CPCRI-1,3 vs non-PGPRs (Enterobacter cloacae EcWSU1, Enterobacter cloacae subsp cloacae ATCC 13047)
Table S12B	KEGG comparison summary for CPCRI-1,3 vs non-PGPRs (Enterobacter cloacae EcWSU1, Enterobacter cloacae subsp cloacae ATCC 13047)
Table S12C	SEED comparison summary for CPCRI-3 vs non-PGPRs (Pseudomonas putida S16)
Table S12D	SEED comparison summary for CPCRI-3 vs non-PGPRs (Pseudomonas putida S16)
Table S12E	GO comparison summary of CPCRI-1 vs Enterobacter cloacae EcWSU1 (a non-PGPR)
Table S12F	GO comparison summary of CPCRI-1 vs Enterobacter cloacae subsp cloacae ATCC 13047(a non-PGPR)
Table S12G	GO comparison summary of CPCRI-2 vs Pseudomonas putida strain S16 (a non-PGPR)
Table S12H	GO comparison summary of CPCRI-3 vs Enterobacter cloacae EcWSU1 (a non-PGPR)
Table S12I	GO comparison summary of CPCRI-3 vs Enterobacter cloacae subsp cloacae ATCC 13047(a non-PGPR)
Table S13	Bacteria secretion system KEGG pathway gene in CPCRI-1, CPCRI-2 and CPCRI-3 genomes

## Sheet: Table S12A
Table S12A. SEED comparison summary for CPCRI-1,3 vs non-PGPRs ( Enterobacter cloacae EcWSU1, Enterobacter cloacae subsp cloacae ATCC 13047)
SEED	CPCRI-1 (Total gene)	CPCRI-3 (Total gene)	Enterobacter cloacae EcWSU1 (Total gene)	Enterobacter cloacae subsp cloacae ATCC 13047 (Total gene)	CPCRI-1- Enterobacter cloacae EcWSU1	CPCRI-3- Enterobacter cloacae EcWSU1	CPCRI-1- Enterobacter cloacae subsp cloacae ATCC 13047	CPCRI-3- Enterobacter cloacae subsp cloacae ATCC 13047
SEED;Virulence;Resistance to antibiotics and toxic compounds;Resistance to antibiotics and toxic compounds	55	54	61	127	0.925488	0.851196	0.00106747	0.000192258
SEED;Carbohydrates;Carbohydrates	370	374	394	364	0.384563	0.763527	2.42822e-05	0.000258573
SEED;Virulence;Resistance to antibiotics and toxic compounds;Cobalt-zinc-cadmium_resistance;Cobalt-zinc-cadmium_resistance	7	6	13	31	0.37153	0.17247	0.00266457	0.000672759
SEED;Virulence;Resistance to antibiotics and toxic compounds;Mercury_resistance_operon;Mercury_resistance_operon	0	3	0	19	1	0.111576	5.56084e-05	0.00426972
SEED;Cofactors, Vitamins, Prosthetic Groups, Pigments;Cofactors, Vitamins, Prosthetic Groups, Pigments	135	140	127	127	0.131831	0.171812	0.00352616	0.00489899
SEED;Virulence;Resistance to antibiotics and toxic compounds;Arsenic_resistance;Arsenic_resistance	4	5	3	22	0.712397	0.493555	0.00483982	0.010216
SEED;Respiration;Biogenesis_of_c-type_cytochromes;Biogenesis_of_c-type_cytochromes	4	14	5	5	1	0.0362817	1	0.0102169
SEED;Carbohydrates;Monosaccharides;Monosaccharides	120	128	133	120	0.848108	0.80163	0.0205569	0.0138412
SEED;Cofactors, Vitamins, Prosthetic Groups, Pigments;Tetrapyrroles;Cobalamin_synthesis;Cobalamin_synthesis	0	5	1	0	1	0.112328	1	0.0159992
SEED;Regulation and Cell signaling;Orphan_regulatory_proteins;Glycine cleavage system transcriptional activator;Glycine cleavage system transcriptional activator	2	5	2	0	1	0.272727	0.179554	0.0159992
SEED;Virulence;Type III, Type IV, Type VI, ESAT secretion systems;Type_4_conjugative_transfer_system,_IncI1_type;Type_4_conjugative_transfer_system,_IncI1_type	2	3	2	16	1	0.676678	0.007231	0.0183256
SEED;Protein Metabolism;Protein Metabolism	155	163	154	161	0.246281	0.253208	0.0206093	0.0196561
SEED;Cofactors, Vitamins, Prosthetic Groups, Pigments;Tetrapyrroles;Coenzyme_B12_biosynthesis;Coenzyme_B12_biosynthesis	6	12	5	4	0.764656	0.0874111	0.340434	0.0200568
SEED;Virulence;Resistance to antibiotics and toxic compounds;Copper_homeostasis;Copper_homeostasis	3	5	6	19	0.515905	1	0.00791783	0.0240554
SEED;Amino Acids and Derivatives;Amino Acids and Derivatives	206	202	205	208	0.188612	0.576978	0.00321505	0.0288983
SEED;Carbohydrates;Monosaccharides;L-ascorbate_utilization_(and_related_gene_clusters);L-ascorbate_utilization_(and_related_gene_clusters)	6	1	9	10	0.796786	0.0223171	0.80322	0.0289266
SEED;Cell Wall and Capsule;Cell Wall and Capsule	122	125	110	122	0.0831747	0.128661	0.0182423	0.0322491
SEED;Nucleosides and Nucleotides;Nucleosides and Nucleotides	69	76	74	68	0.736012	0.564575	0.0673541	0.0341708
SEED;Fatty Acids, Lipids, and Isoprenoids;Isoprenoids;Carotenoids;Carotenoids	0	4	0	0	1	0.0537277	1	0.0365734
SEED;Fatty Acids, Lipids, and Isoprenoids;Fatty Acids, Lipids, and Isoprenoids	54	67	60	59	0.924891	0.325587	0.251913	0.0375005
SEED;Carbohydrates;Sugar alcohols;Inositol_catabolism;Inositol_catabolism	0	0	6	6	0.0332174	0.0318764	0.0424612	0.0387828
SEED;Respiration;Electron donating reactions;NiFe_hydrogenase_maturation;NiFe_hydrogenase_maturation	5	0	5	6	1	0.0633297	1	0.0387828
SEED;RNA Metabolism;RNA Metabolism	79	81	76	75	0.329896	0.420673	0.0323335	0.0421986
SEED;Virulence;Type III, Type IV, Type VI, ESAT secretion systems;Type III, Type IV, Type VI, ESAT secretion systems	12	32	14	64	1	0.00449771	1.02248e-06	0.048926
SEED;Virulence;Ton_and_Tol_transport_systems;Ton_and_Tol_transport_systems	24	30	23	22	0.561651	0.269942	0.182123	0.0494614
SEED;Motility and Chemotaxis;Flagellar motility in Prokaryota;Flagellum;Flagellum	77	42	43	79	0.000202351	0.828148	0.0863863	0.0525163
SEED;Nitrogen Metabolism;Nitrogen Metabolism	45	45	39	38	0.227764	0.325988	0.0338247	0.0591575
SEED;Carbohydrates;Di- and oligosaccharides;Beta-Glucoside_Metabolism;Beta-Glucoside_Metabolism	23	24	23	17	0.660465	0.770235	0.0559739	0.0597165
SEED;Motility and Chemotaxis;Flagellar motility in Prokaryota;Flagellar motility in Prokaryota	82	48	48	87	0.000256511	0.758441	0.11648	0.066186
SEED;RNA Metabolism;RNA processing and modification;RNA processing and modification	48	53	48	47	0.538742	0.423432	0.117954	0.0683002
SEED;Virulence;Iron Scavenging Mechanisms;Iron Scavenging Mechanisms	34	39	33	32	0.540447	0.343997	0.135924	0.0710903
SEED;Virulence;Resistance to antibiotics and toxic compounds;Cobalt-zinc-cadmium_resistance;Cation efflux system protein CusC precursor;Cation efflux system protein CusC precursor	0	0	1	5	1	1	0.0772626	0.072453
SEED;RNA Metabolism;RNA processing and modification;Queuosine-Archaeosine_Biosynthesis;Permease of the drug/metabolite transporter (DMT) superfamily;Permease of the drug/metabolite transporter (DMT) superfamily	8	11	5	5	0.405453	0.132521	0.17292	0.0740317
SEED;Amino Acids and Derivatives;Aromatic amino acids and derivatives;Aromatic amino acids and derivatives	14	16	9	10	0.210872	0.159376	0.146895	0.076111
SEED;Virulence;Iron Scavenging Mechanisms;Hemin_transport_system;Outer membrane receptor proteins, mostly Fe transport;Outer membrane receptor proteins, mostly Fe transport	0	3	0	0	1	0.111576	1	0.0836159
SEED;RNA Metabolism;RNA processing and modification;Queuosine-Archaeosine_Biosynthesis;Queuosine-Archaeosine_Biosynthesis	17	20	15	14	0.483688	0.312515	0.20214	0.0845054
SEED;Carbohydrates;Monosaccharides;Mannose_Metabolism;Mannose_Metabolism	7	9	7	4	1	0.619503	0.221543	0.0909638
SEED;DNA Metabolism;DNA repair;DNA_repair,_bacterial;SOS-response repressor and protease LexA (EC 3.4.21.88);SOS-response repressor and protease LexA (EC 3.4.21.88)	2	5	1	1	0.602338	0.112328	0.577795	0.0926649
SEED;Amino Acids and Derivatives;Lysine, threonine, methionine, and cysteine.1;Lysine, threonine, methionine, and cysteine.1	73	74	68	72	0.268719	0.353092	0.0622753	0.0935676
SEED;Cell Wall and Capsule;Peptidoglycan_Biosynthesis;Peptidoglycan_Biosynthesis	23	25	20	19	0.444257	0.370316	0.118203	0.0937595
SEED;Protein Metabolism;Selenoproteins;Selenoproteins	11	12	9	7	0.506487	0.513321	0.150439	0.106097
SEED;Nucleosides and Nucleotides;Purines;Purines	25	27	25	22	0.671832	0.676712	0.141138	0.114276
SEED;Sulfur Metabolism;Sulfur Metabolism	23	27	26	22	1	0.783069	0.289798	0.114276
SEED;Protein Metabolism;Protein biosynthesis;Protein biosynthesis	94	96	98	98	0.559188	0.7171	0.0765774	0.124736
SEED;Stress Response;Stress Response	83	81	78	82	0.23275	0.522013	0.0468235	0.131034
SEED;Carbohydrates;Monosaccharides;L-rhamnose_utilization;L-rhamnose_utilization	17	17	11	12	0.183545	0.191199	0.090543	0.133112
SEED;Carbohydrates;Aminosugars;N-Acetyl-Galactosamine_and_Galactosamine_Utilization;N-Acetyl-Galactosamine_and_Galactosamine_Utilization	4	0	5	4	1	0.0633297	0.72913	0.136866
SEED;DNA Metabolism;DNA replication;Plasmid_replication;Plasmid_replication	0	0	0	4	1	1	0.142561	0.136866
SEED;Regulation and Cell signaling;Programmed Cell Death and Toxin-antitoxin Systems;Toxin-antitoxin_replicon_stabilization_systems;Toxin-antitoxin_replicon_stabilization_systems	0	0	1	4	1	1	0.142561	0.136866
SEED;Virulence;Virulence	153	187	164	279	0.606429	0.0640163	0.00446994	0.138223
SEED;Fatty Acids, Lipids, and Isoprenoids;Isoprenoids;Isoprenoids	10	14	10	9	0.824949	0.413963	0.365446	0.13909
SEED;Respiration;Respiration	106	103	107	107	0.404583	0.834063	0.0353358	0.139794
SEED;Virulence;Resistance to antibiotics and toxic compounds;Multidrug_efflux_pump_in_Campylobacter_jejuni_(CmeABC_operon);Multidrug_efflux_pump_in_Campylobacter_jejuni_(CmeABC_operon)	5	1	5	6	1	0.220603	1	0.145731
SEED;Carbohydrates;Monosaccharides;D-gluconate_and_ketogluconates_metabolism;D-gluconate_and_ketogluconates_metabolism	5	8	4	4	0.742212	0.252383	0.507644	0.145847
SEED;Fatty Acids, Lipids, and Isoprenoids;Fatty acids;Fatty_Acid_Biosynthesis_FASII;3-oxoacyl-[acyl-carrier protein] reductase (EC 1.1.1.100);3-oxoacyl-[acyl-carrier protein] reductase (EC 1.1.1.100)	6	8	6	4	1	0.596728	0.340434	0.145847
SEED;Cofactors, Vitamins, Prosthetic Groups, Pigments;Tetrapyrroles;Tetrapyrroles	22	26	20	22	0.536052	0.300878	0.359302	0.14805
SEED;Carbohydrates;Monosaccharides;D-Sorbitol(D-Glucitol)_and_L-Sorbose_Utilization;D-Sorbitol(D-Glucitol)_and_L-Sorbose_Utilization	2	1	9	7	0.0715235	0.0223171	0.317863	0.149451
SEED;Carbohydrates;Di- and oligosaccharides;Di- and oligosaccharides	82	80	87	82	0.697289	1	0.055702	0.151574
SEED;Carbohydrates;Organic acids;Organic acids	15	14	9	10	0.151833	0.296304	0.103245	0.155733
SEED;Nitrogen Metabolism;Ammonia_assimilation;Ammonia_assimilation	14	14	11	10	0.423745	0.548604	0.146895	0.155733
SEED;Nucleosides and Nucleotides;Purines;Purine_conversions;Purine_conversions	17	18	15	14	0.483688	0.489411	0.20214	0.158305
SEED;Carbohydrates;Fermentation;Fermentation	17	19	16	15	0.604328	0.501192	0.282137	0.168186
SEED;Fatty Acids, Lipids, and Isoprenoids;Phospholipids;Phospholipids	23	29	24	25	0.77169	0.408392	0.466006	0.168625
SEED;Fatty Acids, Lipids, and Isoprenoids;Phospholipids;Glycerolipid_and_Glycerophospholipid_Metabolism_in_Bacteria;Glycerolipid_and_Glycerophospholipid_Metabolism_in_Bacteria	23	29	24	25	0.77169	0.408392	0.466006	0.168625
SEED;Miscellaneous;Miscellaneous	20	24	20	20	0.751603	0.450584	0.340173	0.170838
SEED;Protein Metabolism;Selenoproteins;Selenocysteine_metabolism;Selenocysteine_metabolism	9	9	5	5	0.283497	0.287764	0.110147	0.176132
SEED;Carbohydrates;Monosaccharides;D-galactonate_catabolism;D-galactonate_catabolism	7	9	6	5	0.782356	0.441668	0.381455	0.176132
SEED;Membrane Transport;ABC transporters;ABC transporters	14	16	12	12	0.556283	0.351408	0.240974	0.182337
SEED;Stress Response;Oxidative stress;Oxidative stress	39	44	43	42	0.911768	0.667571	0.310721	0.19009
SEED;Carbohydrates;Sugar alcohols;Ribitol,_Xylitol,_Arabitol,_Mannitol_and_Sorbitol_utilization;Ribitol,_Xylitol,_Arabitol,_Mannitol_and_Sorbitol_utilization	1	2	0	0	0.467612	0.231736	0.423708	0.191192
SEED;Carbohydrates;Sugar alcohols;Ribitol,_Xylitol,_Arabitol,_Mannitol_and_Sorbitol_utilization;Sorbitol dehydrogenase (EC 1.1.1.14);Sorbitol dehydrogenase (EC 1.1.1.14)	0	2	0	0	1	0.231736	1	0.191192
SEED;RNA Metabolism;RNA processing and modification;RNA_3'-terminal_phosphate_cyclase;RNA_3'-terminal_phosphate_cyclase	0	2	0	0	1	0.231736	1	0.191192
SEED;Cell Wall and Capsule;Peptidoglycan_Biosynthesis;Multimodular transpeptidase-transglycosylase (EC 2.4.1.129) (EC 3.4.-.-);Multimodular transpeptidase-transglycosylase (EC 2.4.1.129) (EC 3.4.-.-)	2	2	1	0	0.602338	0.611517	0.179554	0.191192
SEED;Membrane Transport;ABC transporters;ABC_transporter_branched-chain_amino_acid_(TC_3.A.1.4.1);Branched-chain amino acid ABC transporter, amino acid-binding protein (TC 3.A.1.4.1);Branched-chain amino acid ABC transporter, amino acid-binding protein (TC 3.A.1.4.1)	2	2	1	0	0.602338	0.611517	0.179554	0.191192
SEED;Carbohydrates;Monosaccharides;Mannose_Metabolism;Phosphomannomutase (EC 5.4.2.8);Phosphomannomutase (EC 5.4.2.8)	1	2	1	0	1	0.611517	0.423708	0.191192
SEED;Carbohydrates;Di- and oligosaccharides;Beta-Glucoside_Metabolism;Beta-glucoside bgl operon antiterminator, BglG family;Beta-glucoside bgl operon antiterminator, BglG family	0	2	1	0	1	0.611517	1	0.191192
SEED;Amino Acids and Derivatives;Aromatic amino acids and derivatives;Aromatic_amino_acid_degradation;Aromatic_amino_acid_degradation	5	6	3	3	0.486062	0.328055	0.296152	0.191979
SEED;Carbohydrates;CO2 fixation;CO2 fixation	18	18	19	15	0.869663	1	0.162667	0.222661
SEED;Membrane Transport;Membrane Transport	53	50	52	50	0.491317	0.920697	0.0710676	0.224541
SEED;Cofactors, Vitamins, Prosthetic Groups, Pigments;Folate and pterines;Folate and pterines	23	29	26	27	1	0.502392	0.66748	0.227582
SEED;Cell Wall and Capsule;Capsular and extracellular polysacchrides;Capsular_heptose_biosynthesis;Capsular_heptose_biosynthesis	4	7	5	4	1	0.569462	0.72913	0.228767
SEED;Nucleosides and Nucleotides;Pyrimidines;Pyrimidines	8	10	8	7	0.807666	0.638902	0.439058	0.228984
SEED;Nucleosides and Nucleotides;Pyrimidines;Pyrimidine_utilization;Pyrimidine_utilization	8	10	8	7	0.807666	0.638902	0.439058	0.228984
SEED;Carbohydrates;Monosaccharides;Xylose_utilization;Xylose_utilization	15	14	12	11	0.440745	0.695093	0.162887	0.231257
SEED;Miscellaneous;ZZ_gjo_need_homes;ZZ_gjo_need_homes	16	19	16	16	0.726325	0.501192	0.474092	0.233824
SEED;Carbohydrates;Central carbohydrate metabolism;Central carbohydrate metabolism	60	63	68	66	1	1	0.239523	0.24698
SEED;Amino Acids and Derivatives;Proline and 4-hydroxyproline;Proline and 4-hydroxyproline	8	11	8	8	0.807666	0.492452	0.615876	0.250229
SEED;Amino Acids and Derivatives;Lysine, threonine, methionine, and cysteine.1;Threonine_and_Homoserine_Biosynthesis;Threonine_and_Homoserine_Biosynthesis	11	11	9	8	0.506487	0.655687	0.24451	0.250229
SEED;Virulence;Iron Scavenging Mechanisms;Hemin_transport_system;Hemin_transport_system	8	11	10	8	1	0.827752	0.615876	0.250229
SEED;Protein Metabolism;Selenoproteins;Selenocysteine_metabolism;selenocysteine-containing;selenocysteine-containing	5	5	2	2	0.263479	0.272727	0.142161	0.251812
SEED;Motility and Chemotaxis;Bacterial_Chemotaxis;Methyl-accepting chemotaxis protein I (serine chemoreceptor protein);Methyl-accepting chemotaxis protein I (serine chemoreceptor protein)	4	5	2	2	0.427814	0.272727	0.250192	0.251812
SEED;Amino Acids and Derivatives;Proline and 4-hydroxyproline;Proline,_4-hydroxyproline_uptake_and_utilization;L-Proline/Glycine betaine transporter ProP;L-Proline/Glycine betaine transporter ProP	2	5	2	2	1	0.272727	1	0.251812
SEED;Amino Acids and Derivatives;Lysine, threonine, methionine, and cysteine.1;Threonine_and_Homoserine_Biosynthesis;Aspartate aminotransferase (EC 2.6.1.1);Aspartate aminotransferase (EC 2.6.1.1)	6	5	3	2	0.320265	0.493555	0.0783341	0.251812
SEED;Membrane Transport;ABC transporters;ABC_transporter_branched-chain_amino_acid_(TC_3.A.1.4.1);ABC_transporter_branched-chain_amino_acid_(TC_3.A.1.4.1)	4	5	3	2	0.712397	0.493555	0.250192	0.251812
SEED;Carbohydrates;Sugar alcohols;Mannitol_Utilization;Mannitol_Utilization	3	5	3	2	1	0.493555	0.656312	0.251812
SEED;Carbohydrates;Di- and oligosaccharides;Beta-Glucoside_Metabolism;6-phospho-beta-glucosidase (EC 3.2.1.86);6-phospho-beta-glucosidase (EC 3.2.1.86)	5	5	4	2	0.742212	0.746033	0.142161	0.251812
SEED;Carbohydrates;Fermentation;Butanol_Biosynthesis;Butanol_Biosynthesis	3	5	4	2	1	0.746033	0.656312	0.251812
SEED;DNA Metabolism;DNA repair;DNA repair	53	56	51	58	0.429421	0.436405	0.288008	0.255659
SEED;Carbohydrates;Di- and oligosaccharides;Sucrose_utilization;Sucrose_utilization	2	0	4	3	0.69135	0.125989	1	0.261819
SEED;Virulence;Resistance to antibiotics and toxic compounds;Cobalt-zinc-cadmium_resistance;Cobalt-zinc-cadmium resistance protein CzcA;Cobalt-zinc-cadmium resistance protein CzcA	0	0	1	3	1	1	0.267474	0.261819
SEED;Virulence;Resistance to antibiotics and toxic compounds;Cobalt-zinc-cadmium_resistance;Cobalt/zinc/cadmium efflux RND transporter, membrane fusion protein, CzcB family;Cobalt/zinc/cadmium efflux RND transporter, membrane fusion protein, CzcB family	0	0	1	3	1	1	0.267474	0.261819
SEED;Virulence;Resistance to antibiotics and toxic compounds;Cobalt-zinc-cadmium_resistance;Heavy metal sensor histidine kinase;Heavy metal sensor histidine kinase	0	0	0	3	1	1	0.267474	0.261819
SEED;Virulence;Resistance to antibiotics and toxic compounds;Cobalt-zinc-cadmium_resistance;Copper-sensing two-component system response regulator CusR;Copper-sensing two-component system response regulator CusR	0	0	1	3	1	1	0.267474	0.261819
SEED;Virulence;Resistance to antibiotics and toxic compounds;Cobalt-zinc-cadmium_resistance;Copper sensory histidine kinase CusS;Copper sensory histidine kinase CusS	0	0	1	3	1	1	0.267474	0.261819
SEED;Virulence;Resistance to antibiotics and toxic compounds;Cobalt-zinc-cadmium_resistance;Cation efflux system protein CusF precursor;Cation efflux system protein CusF precursor	0	0	1	3	1	1	0.267474	0.261819
SEED;Virulence;Resistance to antibiotics and toxic compounds;Arsenic_resistance;Arsenical resistance operon trans-acting repressor ArsD;Arsenical resistance operon trans-acting repressor ArsD	0	0	0	3	1	1	0.267474	0.261819
SEED;Virulence;Resistance to antibiotics and toxic compounds;Arsenic_resistance;Arsenical pump-driving ATPase (EC 3.6.3.16);Arsenical pump-driving ATPase (EC 3.6.3.16)	0	0	0	3	1	1	0.267474	0.261819
SEED;Virulence;Resistance to antibiotics and toxic compounds;Copper_homeostasis;Copper sensory histidine kinase CusS;Copper sensory histidine kinase CusS	0	0	1	3	1	1	0.267474	0.261819
SEED;Virulence;Resistance to antibiotics and toxic compounds;Copper_homeostasis;Copper-sensing two-component system response regulator CusR;Copper-sensing two-component system response regulator CusR	0	0	1	3	1	1	0.267474	0.261819
SEED;Virulence;Resistance to antibiotics and toxic compounds;Mercury_resistance_operon;Mercuric ion reductase (EC:1.16.1.1);Mercuric ion reductase (EC:1.16.1.1)	0	0	0	3	1	1	0.267474	0.261819
SEED;Virulence;Resistance to antibiotics and toxic compounds;Mercury_resistance_operon;Mercuric resistance operon coregulator;Mercuric resistance operon coregulator	0	0	0	3	1	1	0.267474	0.261819
SEED;Virulence;Resistance to antibiotics and toxic compounds;Mercury_resistance_operon;Mercuric transport protein, MerE;Mercuric transport protein, MerE	0	0	0	3	1	1	0.267474	0.261819
SEED;Virulence;Resistance to antibiotics and toxic compounds;Mercuric_reductase;Mercuric_reductase	0	0	0	3	1	1	0.267474	0.261819
SEED;Virulence;Resistance to antibiotics and toxic compounds;Mercuric_reductase;Mercuric ion reductase (EC:1.16.1.1);Mercuric ion reductase (EC:1.16.1.1)	0	0	0	3	1	1	0.267474	0.261819
SEED;Cell Wall and Capsule;Capsular and extracellular polysacchrides;Pseudaminic_Acid_Biosynthesis;Pseudaminic_Acid_Biosynthesis	0	0	0	3	1	1	0.267474	0.261819
SEED;Cell Wall and Capsule;Capsular and extracellular polysacchrides;Capsular_surface_virulence_antigen_loci;Capsular_surface_virulence_antigen_loci	0	0	0	3	1	1	0.267474	0.261819
SEED;Regulation and Cell signaling;Programmed Cell Death and Toxin-antitoxin Systems;Toxin-antitoxin_replicon_stabilization_systems;RelB protein (antitoxin to RelE);RelB protein (antitoxin to RelE)	0	0	1	3	1	1	0.267474	0.261819
SEED;Regulation and Cell signaling;Orphan_regulatory_proteins;Copper sensory histidine kinase CusS;Copper sensory histidine kinase CusS	0	0	1	3	1	1	0.267474	0.261819
SEED;Regulation and Cell signaling;Orphan_regulatory_proteins;Copper-sensing two-component system response regulator CusR;Copper-sensing two-component system response regulator CusR	0	0	1	3	1	1	0.267474	0.261819
SEED;Carbohydrates;Organic acids;Malonate_decarboxylase;Malonate_decarboxylase	8	8	5	5	0.405453	0.410144	0.17292	0.264042
SEED;Carbohydrates;Di- and oligosaccharides;Trehalose_Biosynthesis;Trehalose_Biosynthesis	7	8	5	5	0.565119	0.410144	0.381455	0.264042
SEED;Amino Acids and Derivatives;Proline and 4-hydroxyproline;Proline,_4-hydroxyproline_uptake_and_utilization;Proline,_4-hydroxyproline_uptake_and_utilization	5	8	5	5	1	0.410144	0.751943	0.264042
SEED;Virulence;Iron Scavenging Mechanisms;Transport_of_Iron;Transport_of_Iron	7	12	8	9	1	0.371402	1	0.271507
SEED;Virulence;Resistance to antibiotics and toxic compounds;Multidrug_Resistance_Efflux_Pumps;Multidrug_Resistance_Efflux_Pumps	17	10	18	20	0.866378	0.255456	0.739509	0.274455
SEED;Nitrogen Metabolism;Nitrate_and_nitrite_ammonification;Nitrate_and_nitrite_ammonification	22	22	20	20	0.536052	0.643616	0.21179	0.277717
SEED;Clustering-based subsystems;Clustering-based subsystems	80	75	78	81	0.335751	0.870474	0.0647273	0.290792
SEED;Cofactors, Vitamins, Prosthetic Groups, Pigments;NAD and NADP;NAD and NADP	13	13	11	10	0.541115	0.683435	0.205783	0.292572
SEED;Carbohydrates;Monosaccharides;D-galactarate,_D-glucarate_and_D-glycerate_catabolism;D-galactarate,_D-glucarate_and_D-glycerate_catabolism	6	9	6	6	1	0.441668	0.771534	0.29734
SEED;Cell Wall and Capsule;Capsular and extracellular polysacchrides;Capsular and extracellular polysacchrides	39	39	31	39	0.149363	0.230299	0.205514	0.302535
SEED;Carbohydrates;Di- and oligosaccharides;Trehalose_Uptake_and_Utilization;Maltoporin (maltose/maltodextrin high-affinity receptor, phage lambda receptor protein);Maltoporin (maltose/maltodextrin high-affinity receptor, phage lambda receptor protein)	3	5	4	3	1	0.746033	0.702896	0.309055
SEED;Carbohydrates;Di- and oligosaccharides;Maltose_and_Maltodextrin_Utilization;Maltoporin (maltose/maltodextrin high-affinity receptor, phage lambda receptor protein);Maltoporin (maltose/maltodextrin high-affinity receptor, phage lambda receptor protein)	3	5	4	3	1	0.746033	0.702896	0.309055
SEED;Virulence;Ton_and_Tol_transport_systems;TonB-dependent siderophore receptor;TonB-dependent siderophore receptor	6	5	5	3	0.764656	1	0.181493	0.309055
SEED;Virulence;Resistance to antibiotics and toxic compounds;Arsenic_resistance;Arsenate reductase (EC 1.20.4.1);Arsenate reductase (EC 1.20.4.1)	2	2	2	7	1	1	0.317863	0.314867
SEED;Motility and Chemotaxis;Motility and Chemotaxis	100	69	63	105	0.000249321	0.380415	0.0740678	0.316207
SEED;Phosphorus Metabolism;Phosphorus Metabolism	32	33	34	33	0.805295	0.902612	0.313726	0.321024
SEED;Respiration;Electron accepting reactions;Electron accepting reactions	26	26	24	25	0.480047	0.670767	0.255646	0.323339
SEED;Clustering-based subsystems;Bacterial_Cell_Division;Bacterial_Cell_Division	25	26	26	25	0.779542	0.889487	0.31567	0.323339
SEED;Carbohydrates;Monosaccharides;D-galactarate,_D-glucarate_and_D-glycerate_catabolism;Glucarate dehydratase (EC 4.2.1.40);Glucarate dehydratase (EC 4.2.1.40)	2	3	1	1	0.602338	0.357394	0.577795	0.324954
SEED;Nitrogen Metabolism;Ammonia_assimilation;Nitrogen regulation protein NR(I);Nitrogen regulation protein NR(I)	2	3	1	1	0.602338	0.357394	0.577795	0.324954
SEED;Cell Wall and Capsule;Cell wall of Mycobacteria;mycolic_acid_synthesis;acyl-CoA synthetase;acyl-CoA synthetase	2	3	1	1	0.602338	0.357394	0.577795	0.324954
SEED;Cell Wall and Capsule;Capsular and extracellular polysacchrides;CMP-N-acetylneuraminate_Biosynthesis;CMP-N-acetylneuraminate_Biosynthesis	1	3	1	1	1	0.357394	1	0.324954
SEED;Carbohydrates;Monosaccharides;D-galactonate_catabolism;D-galactonate transporter;D-galactonate transporter	3	3	2	1	0.669966	0.676678	0.317816	0.324954
SEED;Virulence;Regulation of virulence;Regulation of virulence	3	3	2	1	0.669966	0.676678	0.317816	0.324954
SEED;Virulence;Regulation of virulence;Streptococcal_Mga_Regulon;Streptococcal_Mga_Regulon	3	3	2	1	0.669966	0.676678	0.317816	0.324954
SEED;Virulence;Regulation of virulence;Streptococcal_Mga_Regulon;Two-component system response regulator;Two-component system response regulator	3	3	2	1	0.669966	0.676678	0.317816	0.324954
SEED;Regulation and Cell signaling;Two-component_regulatory_systems_in_Campylobacter;Two-component system response regulator;Two-component system response regulator	3	3	2	1	0.669966	0.676678	0.317816	0.324954
SEED;Virulence;Ton_and_Tol_transport_systems;TonB-dependent receptor;TonB-dependent receptor	2	3	2	1	1	0.676678	0.577795	0.324954
SEED;Virulence;Iron Scavenging Mechanisms;Iron_acquisition_in_Vibrio;TonB-dependent receptor;TonB-dependent receptor	2	3	2	1	1	0.676678	0.577795	0.324954
SEED;Fatty Acids, Lipids, and Isoprenoids;Phospholipids;Glycerolipid_and_Glycerophospholipid_Metabolism_in_Bacteria;Glycerate kinase (EC 2.7.1.31);Glycerate kinase (EC 2.7.1.31)	2	3	2	1	1	0.676678	0.577795	0.324954
SEED;Stress Response;Oxidative stress;Oxidative_stress;Oxidative_stress	18	20	21	18	1	1	0.399596	0.325818
SEED;Fatty Acids, Lipids, and Isoprenoids;Fatty acids;Fatty acids	22	27	25	26	1	0.676712	0.661899	0.331596
SEED;Fatty Acids, Lipids, and Isoprenoids;Fatty acids;Fatty_Acid_Biosynthesis_FASII;Fatty_Acid_Biosynthesis_FASII	22	27	25	26	1	0.676712	0.661899	0.331596
SEED;DNA Metabolism;DNA Metabolism	101	103	97	116	0.249446	0.353116	0.237735	0.335629
SEED;Virulence;Type III, Type IV, Type VI, ESAT secretion systems;Type_4_secretion_and_conjugative_transfer;Type_4_secretion_and_conjugative_transfer	0	20	2	34	0.502063	4.16273e-05	1.0505e-08	0.339392
SEED;Cell Wall and Capsule;Gram-Negative cell wall components;LOS_core_oligosaccharide_biosynthesis;LOS_core_oligosaccharide_biosynthesis	15	15	11	13	0.325927	0.432419	0.253749	0.341749
SEED;Sulfur Metabolism;Organic sulfur assimilation;Organic sulfur assimilation	13	15	14	13	1	0.714086	0.434736	0.341749
SEED;Cell Wall and Capsule;Cell wall of Mycobacteria;Cell wall of Mycobacteria	8	10	9	8	1	0.81932	0.615876	0.347487
SEED;Virulence;Iron Scavenging Mechanisms;Iron_acquisition_in_Vibrio;Iron_acquisition_in_Vibrio	19	21	18	20	0.622443	0.522675	0.422627	0.34766
SEED;RNA Metabolism;Transcription;Transcription	30	28	28	28	0.509718	0.790193	0.182251	0.348109
SEED;Amino Acids and Derivatives;Lysine, threonine, methionine, and cysteine.1;Lysine_Biosynthesis_DAP_Pathway;Dihydrodipicolinate synthase (EC 4.2.1.52);Dihydrodipicolinate synthase (EC 4.2.1.52)	2	6	2	4	1	0.165469	1	0.349423
SEED;Cell Wall and Capsule;Capsular and extracellular polysacchrides;Sialic_Acid_Metabolism;Sialic_Acid_Metabolism	9	6	3	4	0.0786845	0.328055	0.0878262	0.349423
SEED;Cell Wall and Capsule;Gram-Negative cell wall components;KDO2-Lipid_A_biosynthesis;KDO2-Lipid_A_biosynthesis	22	22	22	21	0.762385	0.880159	0.279616	0.357072
SEED;Protein Metabolism;Protein biosynthesis;Ribosome_SSU_bacterial;Ribosome_SSU_bacterial	21	22	22	21	0.878506	0.880159	0.349393	0.357072
SEED;Amino Acids and Derivatives;Lysine, threonine, methionine, and cysteine.1;Lysine_Biosynthesis_DAP_Pathway;Lysine_Biosynthesis_DAP_Pathway	7	11	6	9	0.782356	0.225274	1	0.369119
SEED;Protein Metabolism;Protein degradation;Protein degradation	24	24	20	24	0.363775	0.450584	0.307252	0.385824
SEED;Cell Wall and Capsule;Cell wall of Mycobacteria;mycolic_acid_synthesis;mycolic_acid_synthesis	4	7	4	5	1	0.372908	1	0.386438
SEED;Protein Metabolism;Protein processing and modification;Protein processing and modification	5	7	5	5	1	0.569462	0.751943	0.386438
SEED;Motility and Chemotaxis;Flagellar motility in Prokaryota;Flagellar_motility;Flagellar_motility	29	18	18	31	0.0555923	0.868274	0.361549	0.386937
SEED;Cofactors, Vitamins, Prosthetic Groups, Pigments;Folate and pterines;Molybdenum_cofactor_biosynthesis;Molybdenum_cofactor_biosynthesis	11	12	10	10	0.665033	0.670399	0.382346	0.390189
SEED;Virulence;Resistance to antibiotics and toxic compounds;Multidrug_Resistance_Efflux_Pumps;Acriflavin resistance protein;Acriflavin resistance protein	3	1	4	4	1	0.376637	1	0.394538
SEED;Metabolism of Aromatic Compounds;Metabolism of central aromatic intermediates;Catechol_branch_of_beta-ketoadipate_pathway;Catechol_branch_of_beta-ketoadipate_pathway	1	1	3	4	0.628087	0.625976	0.403777	0.394538
SEED;Cofactors, Vitamins, Prosthetic Groups, Pigments;Tetrapyrroles;Experimental_tye;Sua5 YciO YrdC YwlC family protein;Sua5 YciO YrdC YwlC family protein	2	1	2	4	1	1	1	0.394538
SEED;Clustering-based subsystems;LMPTP_YwlE_cluster;Sua5 YciO YrdC YwlC family protein;Sua5 YciO YrdC YwlC family protein	2	1	2	4	1	1	1	0.394538
SEED;DNA Metabolism;DNA replication;DNA-replication;Replicative DNA helicase (EC 3.6.1.-);Replicative DNA helicase (EC 3.6.1.-)	1	1	1	4	1	1	0.403777	0.394538
SEED;Regulation and Cell signaling;Regulation and Cell signaling	70	69	71	77	0.497609	0.798717	0.207914	0.401644
SEED;Phosphorus Metabolism;Phosphate_metabolism;Phosphate_metabolism	17	19	19	18	1	0.871549	0.495436	0.407276
SEED;Respiration;Formate_hydrogenase;Formate_hydrogenase	16	8	15	16	0.594532	0.217066	0.474092	0.410557
SEED;Cell Wall and Capsule;Gram-Negative cell wall components;Gram-Negative cell wall components	47	47	46	51	0.467167	0.677208	0.304282	0.414247
SEED;Motility and Chemotaxis;Bacterial_Chemotaxis;Dipeptide-binding ABC transporter, periplasmic substrate-binding component (TC 3.A.1.5.2);Dipeptide-binding ABC transporter, periplasmic substrate-binding component (TC 3.A.1.5.2)	3	4	2	2	0.669966	0.437234	0.656312	0.414289
SEED;Cell Wall and Capsule;Peptidoglycan_Biosynthesis;D-alanyl-D-alanine carboxypeptidase (EC 3.4.16.4);D-alanyl-D-alanine carboxypeptidase (EC 3.4.16.4)	3	4	2	2	0.669966	0.437234	0.656312	0.414289
SEED;Membrane Transport;ABC transporters;ABC_transporter_dipeptide_(TC_3.A.1.5.2);ABC_transporter_dipeptide_(TC_3.A.1.5.2)	3	4	2	2	0.669966	0.437234	0.656312	0.414289
SEED;Membrane Transport;ABC transporters;ABC_transporter_dipeptide_(TC_3.A.1.5.2);Dipeptide-binding ABC transporter, periplasmic substrate-binding component (TC 3.A.1.5.2);Dipeptide-binding ABC transporter, periplasmic substrate-binding component (TC 3.A.1.5.2)	3	4	2	2	0.669966	0.437234	0.656312	0.414289
SEED;Carbohydrates;Monosaccharides;Xylose_utilization;Xyloside transporter XynT;Xyloside transporter XynT	5	4	3	2	0.486062	0.717454	0.142161	0.414289
SEED;RNA Metabolism;Transcription;Rrf2_family_transcriptional_regulators;Rrf2_family_transcriptional_regulators	4	4	3	2	0.712397	0.717454	0.250192	0.414289
SEED;Carbohydrates;Fermentation;Butanol_Biosynthesis;Pyruvate formate-lyase (EC 2.3.1.54);Pyruvate formate-lyase (EC 2.3.1.54)	2	4	3	2	1	0.717454	1	0.414289
SEED;Cofactors, Vitamins, Prosthetic Groups, Pigments;Quinone cofactors;Quinone cofactors	26	20	20	19	0.235654	0.874606	0.0482745	0.419069
SEED;Cofactors, Vitamins, Prosthetic Groups, Pigments;NAD and NADP;NAD_regulation;NAD_regulation	8	8	6	6	0.593681	0.596728	0.288755	0.420054
SEED;Potassium metabolism;Potassium metabolism	7	8	6	6	0.782356	0.596728	0.414808	0.420054
SEED;Potassium metabolism;Glutathione-regulated_potassium-efflux_system_and_associated_functions;Glutathione-regulated_potassium-efflux_system_and_associated_functions	7	8	6	6	0.782356	0.596728	0.414808	0.420054
SEED;Metabolism of Aromatic Compounds;Metabolism of central aromatic intermediates;4-Hydroxyphenylacetic_acid_catabolic_pathway;4-Hydroxyphenylacetic_acid_catabolic_pathway	7	8	7	6	1	0.79811	0.414808	0.420054
SEED;Sulfur Metabolism;Thioredoxin-disulfide_reductase;Thioredoxin-disulfide_reductase	6	8	9	6	0.796786	1	0.771534	0.420054
SEED;Motility and Chemotaxis;Bacterial_Chemotaxis;Bacterial_Chemotaxis	28	28	22	29	0.20316	0.320657	0.347042	0.424468
SEED;Cofactors, Vitamins, Prosthetic Groups, Pigments;Thiamin_biosynthesis;Thiamin_biosynthesis	13	13	12	12	0.68958	0.841681	0.418168	0.425458
SEED;Cofactors, Vitamins, Prosthetic Groups, Pigments;Quinone cofactors;Ubiquinone_Biosynthesis;Ubiquinone_Biosynthesis	14	13	13	12	0.700245	0.847508	0.240974	0.425458
SEED;Nucleosides and Nucleotides;Detoxification.1;Nudix_proteins_(nucleoside_triphosphate_hydrolases);Nudix_proteins_(nucleoside_triphosphate_hydrolases)	12	13	15	12	0.849138	1	0.536192	0.425458
SEED;Stress Response;Bacterial_hemoglobins;diguanylate cyclase/phosphodiesterase (GGDEF & EAL domains) with PAS/PAC sensor(s);diguanylate cyclase/phosphodiesterase (GGDEF & EAL domains) with PAS/PAC sensor(s)	3	1	0	0	0.102289	0.481361	0.0760998	0.437226
SEED;Stress Response;SigmaB_stress_responce_regulation;SigmaB_stress_responce_regulation	3	1	0	0	0.102289	0.481361	0.0760998	0.437226
SEED;Carbohydrates;One-carbon Metabolism;Serine-glyoxylate_cycle;decarboxylase;decarboxylase	2	1	0	0	0.218689	0.481361	0.179554	0.437226
SEED;Carbohydrates;One-carbon Metabolism;Serine-glyoxylate_cycle;hydroxypyruvate reductase;hydroxypyruvate reductase	2	1	0	0	0.218689	0.481361	0.179554	0.437226
SEED;Carbohydrates;Monosaccharides;2-Ketogluconate_Utilization;HTH-type transcriptional regulator PtxR;HTH-type transcriptional regulator PtxR	1	1	0	0	0.467612	0.481361	0.423708	0.437226
SEED;Carbohydrates;Monosaccharides;Mannose_Metabolism;PTS system, mannose-specific IID component (EC 2.7.1.69);PTS system, mannose-specific IID component (EC 2.7.1.69)	1	1	0	0	0.467612	0.481361	0.423708	0.437226
SEED;Carbohydrates;Monosaccharides;Mannose_Metabolism;Beta-mannosidase (EC 3.2.1.25);Beta-mannosidase (EC 3.2.1.25)	1	1	0	0	0.467612	0.481361	0.423708	0.437226
SEED;Carbohydrates;Monosaccharides;L-rhamnose_utilization;L-rhamnose isomerase (EC 5.3.1.14);L-rhamnose isomerase (EC 5.3.1.14)	1	1	0	0	0.467612	0.481361	0.423708	0.437226
SEED;Carbohydrates;Monosaccharides;L-rhamnose_utilization;Predicted L-rhamnose ABC transporter, substrate-binding component;Predicted L-rhamnose ABC transporter, substrate-binding component	1	1	0	0	0.467612	0.481361	0.423708	0.437226
SEED;Carbohydrates;Monosaccharides;L-rhamnose_utilization;Predicted L-rhamnose ABC transporter, transmembrane component 1;Predicted L-rhamnose ABC transporter, transmembrane component 1	1	1	0	0	0.467612	0.481361	0.423708	0.437226
SEED;Carbohydrates;Monosaccharides;L-rhamnose_utilization;Predicted L-rhamnose ABC transporter, transmembrane component 2;Predicted L-rhamnose ABC transporter, transmembrane component 2	1	1	0	0	0.467612	0.481361	0.423708	0.437226
SEED;Carbohydrates;Monosaccharides;L-rhamnose_utilization;Predicted L-rhamnose ABC transporter, ATP-binding component;Predicted L-rhamnose ABC transporter, ATP-binding component	1	1	0	0	0.467612	0.481361	0.423708	0.437226
SEED;Carbohydrates;Organic acids;Malonate_decarboxylase;Malonyl CoA acyl carrier protein transacylase (EC 2.3.1.39);Malonyl CoA acyl carrier protein transacylase (EC 2.3.1.39)	1	1	0	0	0.467612	0.481361	0.423708	0.437226
SEED;Carbohydrates;Organic acids;Malonate_decarboxylase;Triphosphoribosyl-dephospho-CoA synthetase (EC 2.7.8.25);Triphosphoribosyl-dephospho-CoA synthetase (EC 2.7.8.25)	1	1	0	0	0.467612	0.481361	0.423708	0.437226
SEED;Carbohydrates;Organic acids;Malonate_decarboxylase;Phosphoribosyl-dephospho-CoA transferase (EC 2.7.7.-);Phosphoribosyl-dephospho-CoA transferase (EC 2.7.7.-)	1	1	0	0	0.467612	0.481361	0.423708	0.437226
SEED;Carbohydrates;CO2 fixation;Photorespiration_(oxidative_C2_cycle);2-hydroxy-3-oxopropionate reductase (EC 1.1.1.60);2-hydroxy-3-oxopropionate reductase (EC 1.1.1.60)	1	1	0	0	0.467612	0.481361	0.423708	0.437226
SEED;Carbohydrates;CO2 fixation;Photorespiration_(oxidative_C2_cycle);Malate synthase (EC 2.3.3.9);Malate synthase (EC 2.3.3.9)	1	1	0	0	0.467612	0.481361	0.423708	0.437226
SEED;Carbohydrates;Di- and oligosaccharides;Trehalose_Biosynthesis;Malto-oligosyltrehalose synthase (EC 5.4.99.15);Malto-oligosyltrehalose synthase (EC 5.4.99.15)	1	1	0	0	0.467612	0.481361	0.423708	0.437226
SEED;Carbohydrates;Di- and oligosaccharides;Beta-Glucoside_Metabolism;6-phospho-beta-glucosidase ascB (EC 3.2.1.86);6-phospho-beta-glucosidase ascB (EC 3.2.1.86)	1	1	0	0	0.467612	0.481361	0.423708	0.437226
SEED;Carbohydrates;Di- and oligosaccharides;Maltose_and_Maltodextrin_Utilization;Maltodextrin glucosidase (EC 3.2.1.20);Maltodextrin glucosidase (EC 3.2.1.20)	1	1	0	0	0.467612	0.481361	0.423708	0.437226
SEED;Cofactors, Vitamins, Prosthetic Groups, Pigments;Folate and pterines;Molybdenum_cofactor_biosynthesis;Molybdenum cofactor biosynthesis protein MoaA;Molybdenum cofactor biosynthesis protein MoaA	1	1	0	0	0.467612	0.481361	0.423708	0.437226
SEED;Cofactors, Vitamins, Prosthetic Groups, Pigments;NAD and NADP;NAD_regulation;Quinolinate phosphoribosyltransferase [decarboxylating] (EC 2.4.2.19);Quinolinate phosphoribosyltransferase [decarboxylating] (EC 2.4.2.19)	1	1	0	0	0.467612	0.481361	0.423708	0.437226
SEED;Cofactors, Vitamins, Prosthetic Groups, Pigments;NAD and NADP;NAD_regulation;Nicotinamidase (EC 3.5.1.19);Nicotinamidase (EC 3.5.1.19)	1	1	0	0	0.467612	0.481361	0.423708	0.437226
SEED;Cofactors, Vitamins, Prosthetic Groups, Pigments;Thiamin_biosynthesis;Thiamine kinase (EC 2.7.1.89);Thiamine kinase (EC 2.7.1.89)	1	1	0	0	0.467612	0.481361	0.423708	0.437226
SEED;Cofactors, Vitamins, Prosthetic Groups, Pigments;Coenzyme A;Coenzyme_A_Biosynthesis;Ketol-acid reductoisomerase (EC 1.1.1.86);Ketol-acid reductoisomerase (EC 1.1.1.86)	1	1	0	0	0.467612	0.481361	0.423708	0.437226
SEED;Cofactors, Vitamins, Prosthetic Groups, Pigments;Coenzyme A;Coenzyme_A_Biosynthesis;Pantothenate:Na+ symporter (TC 2.A.21.1.1);Pantothenate:Na+ symporter (TC 2.A.21.1.1)	1	1	0	0	0.467612	0.481361	0.423708	0.437226
SEED;Cofactors, Vitamins, Prosthetic Groups, Pigments;Pyridoxine;Pyridoxin_(Vitamin_B6)_Biosynthesis;Pyridoxine 5'-phosphate synthase (EC 2.6.99.2);Pyridoxine 5'-phosphate synthase (EC 2.6.99.2)	1	1	0	0	0.467612	0.481361	0.423708	0.437226
SEED;Virulence;Resistance to antibiotics and toxic compounds;Cobalt-zinc-cadmium_resistance;DNA-binding heavy metal response regulator;DNA-binding heavy metal response regulator	1	1	0	0	0.467612	0.481361	0.423708	0.437226
SEED;Virulence;Quorum sensing and biofilm formation;Autoinducer_2_(AI-2)_transport_and_processing_(lsrACDBFGE_operon);Autoinducer 2 (AI-2) ABC transport system, fused AI2 transporter subunits and ATP-binding component;Autoinducer 2 (AI-2) ABC transport system, fused AI2 transporter subunits and ATP-binding component	1	1	0	0	0.467612	0.481361	0.423708	0.437226
SEED;Virulence;Iron Scavenging Mechanisms;Iron_acquisition_in_Vibrio;Ferrichrome transport ATP-binding protein FhuC (TC 3.A.1.14.3);Ferrichrome transport ATP-binding protein FhuC (TC 3.A.1.14.3)	1	1	0	0	0.467612	0.481361	0.423708	0.437226
SEED;Virulence;Iron Scavenging Mechanisms;Transport_of_Iron;Iron-uptake factor PiuB;Iron-uptake factor PiuB	1	1	0	0	0.467612	0.481361	0.423708	0.437226
SEED;Sulfur Metabolism;Sulfur_oxidation;Sulfite oxidase;Sulfite oxidase	1	1	0	0	0.467612	0.481361	0.423708	0.437226
SEED;Stress Response;SigmaB_stress_responce_regulation;anti sigma b factor antagonist RsbV;anti sigma b factor antagonist RsbV	1	1	0	0	0.467612	0.481361	0.423708	0.437226
SEED;Protein Metabolism;Protein biosynthesis;Ribosome_biogenesis_bacterial;Ribosomal-protein-S5p-alanine acetyltransferase;Ribosomal-protein-S5p-alanine acetyltransferase	1	1	0	0	0.467612	0.481361	0.423708	0.437226
SEED;Protein Metabolism;Protein biosynthesis;Ribosome_biogenesis_bacterial;Ribosomal protein S6 glutaminyl transferase;Ribosomal protein S6 glutaminyl transferase	1	1	0	0	0.467612	0.481361	0.423708	0.437226
SEED;Protein Metabolism;Protein processing and modification;Ribosomal_protein_S5p_acylation;Ribosomal-protein-S5p-alanine acetyltransferase;Ribosomal-protein-S5p-alanine acetyltransferase	1	1	0	0	0.467612	0.481361	0.423708	0.437226
SEED;Protein Metabolism;Selenoproteins;Selenocysteine_metabolism;Selenide,water dikinase (EC 2.7.9.3);Selenide,water dikinase (EC 2.7.9.3)	1	1	0	0	0.467612	0.481361	0.423708	0.437226
SEED;RNA Metabolism;Transcription;Rrf2_family_transcriptional_regulators;Rrf2 family transcriptional regulator, group III;Rrf2 family transcriptional regulator, group III	1	1	0	0	0.467612	0.481361	0.423708	0.437226
SEED;Motility and Chemotaxis;Flagellar motility in Prokaryota;Flagellum;Flagellar hook-associated protein 3;Flagellar hook-associated protein 3	1	1	0	0	0.467612	0.481361	0.423708	0.437226
SEED;Amino Acids and Derivatives;Arginine; urea cycle, polyamines;Arginine_and_Ornithine_Degradation;Putrescine aminotransferase (EC 2.6.1.82);Putrescine aminotransferase (EC 2.6.1.82)	1	1	0	0	0.467612	0.481361	0.423708	0.437226
SEED;Amino Acids and Derivatives;Arginine; urea cycle, polyamines;Arginine_Biosynthesis_extended;Argininosuccinate synthase (EC 6.3.4.5);Argininosuccinate synthase (EC 6.3.4.5)	1	1	0	0	0.467612	0.481361	0.423708	0.437226
SEED;Amino Acids and Derivatives;Lysine, threonine, methionine, and cysteine.1;Methionine_Salvage;2,3-diketo-5-methylthiopentyl-1-phosphate enolase-phosphatase (EC 3.1.3.77);2,3-diketo-5-methylthiopentyl-1-phosphate enolase-phosphatase (EC 3.1.3.77)	1	1	0	0	0.467612	0.481361	0.423708	0.437226
SEED;Amino Acids and Derivatives;Lysine, threonine, methionine, and cysteine.1;Cysteine_Biosynthesis;Cysteine synthase B (EC 2.5.1.47);Cysteine synthase B (EC 2.5.1.47)	1	1	0	0	0.467612	0.481361	0.423708	0.437226
SEED;Amino Acids and Derivatives;Aromatic amino acids and derivatives;Aromatic_amino_acid_interconversions_with_aryl_acids;Aromatic_amino_acid_interconversions_with_aryl_acids	1	1	0	0	0.467612	0.481361	0.423708	0.437226
SEED;Amino Acids and Derivatives;Aromatic amino acids and derivatives;Aromatic_amino_acid_interconversions_with_aryl_acids;Phenylacetate-coenzyme A ligase (EC 6.2.1.30);Phenylacetate-coenzyme A ligase (EC 6.2.1.30)	1	1	0	0	0.467612	0.481361	0.423708	0.437226
SEED;Amino Acids and Derivatives;Aromatic amino acids and derivatives;Chorismate:_Intermediate_for_synthesis_of_PAPA_antibiotics,_PABA,_anthranilate,_3-hydroxyanthranilate_and_more.;Aminodeoxychorismate lyase (EC 4.1.3.38);Aminodeoxychorismate lyase (EC 4.1.3.38)	1	1	0	0	0.467612	0.481361	0.423708	0.437226
SEED;Amino Acids and Derivatives;Aromatic amino acids and derivatives;Phenylalanine_and_Tyrosine_Branches_from_Chorismate;Biosynthetic Aromatic amino acid aminotransferase alpha (EC 2.6.1.57);Biosynthetic Aromatic amino acid aminotransferase alpha (EC 2.6.1.57)	1	1	0	0	0.467612	0.481361	0.423708	0.437226
SEED;Amino Acids and Derivatives;Aromatic amino acids and derivatives;Aromatic_amino_acid_degradation;2,4-dihydroxyhept-2-ene-1,7-dioic acid aldolase (EC 4.1.2.-);2,4-dihydroxyhept-2-ene-1,7-dioic acid aldolase (EC 4.1.2.-)	1	1	0	0	0.467612	0.481361	0.423708	0.437226
SEED;Amino Acids and Derivatives;Aromatic amino acids and derivatives;Aromatic_amino_acid_degradation;Aromatic ring-opening dioxygenase;Aromatic ring-opening dioxygenase	1	1	0	0	0.467612	0.481361	0.423708	0.437226
SEED;Nitrogen Metabolism;Nitrosative_stress;Functional role page for Anaerobic nitric oxide reductase transcription regulator NorR;Functional role page for Anaerobic nitric oxide reductase transcription regulator NorR	1	1	0	0	0.467612	0.481361	0.423708	0.437226
SEED;Nitrogen Metabolism;Nitrate_and_nitrite_ammonification;Assimilatory nitrate reductase large subunit (EC:1.7.99.4);Assimilatory nitrate reductase large subunit (EC:1.7.99.4)	1	1	0	0	0.467612	0.481361	0.423708	0.437226
SEED;Fatty Acids, Lipids, and Isoprenoids;Isoprenoids;Isoprenoid_Biosynthesis;4-hydroxy-3-methylbut-2-enyl diphosphate reductase (EC 1.17.1.2);4-hydroxy-3-methylbut-2-enyl diphosphate reductase (EC 1.17.1.2)	1	1	0	0	0.467612	0.481361	0.423708	0.437226
SEED;Nucleosides and Nucleotides;Purines;Purine_conversions;Adenylosuccinate lyase (EC 4.3.2.2);Adenylosuccinate lyase (EC 4.3.2.2)	1	1	0	0	0.467612	0.481361	0.423708	0.437226
SEED;Nucleosides and Nucleotides;Purines;Purine_conversions;Hypoxanthine-guanine phosphoribosyltransferase (EC 2.4.2.8);Hypoxanthine-guanine phosphoribosyltransferase (EC 2.4.2.8)	1	1	0	0	0.467612	0.481361	0.423708	0.437226
SEED;Nucleosides and Nucleotides;Purines;Purine_conversions;AMP nucleosidase (EC 3.2.2.4);AMP nucleosidase (EC 3.2.2.4)	1	1	0	0	0.467612	0.481361	0.423708	0.437226
SEED;Nucleosides and Nucleotides;De_Novo_Pyrimidine_Synthesis;Orotidine 5'-phosphate decarboxylase (EC 4.1.1.23);Orotidine 5'-phosphate decarboxylase (EC 4.1.1.23)	1	1	0	0	0.467612	0.481361	0.423708	0.437226
SEED;Cell Wall and Capsule;Capsular and extracellular polysacchrides;Sialic_Acid_Metabolism;TRAP-type transport system, periplasmic component, predicted N-acetylneuraminate-binding protein;TRAP-type transport system, periplasmic component, predicted N-acetylneuraminate-binding protein	1	1	0	0	0.467612	0.481361	0.423708	0.437226
SEED;Cell Wall and Capsule;Peptidoglycan_Biosynthesis;Membrane-bound lytic murein transglycosylase B precursor (EC 3.2.1.-);Membrane-bound lytic murein transglycosylase B precursor (EC 3.2.1.-)	1	1	0	0	0.467612	0.481361	0.423708	0.437226
SEED;Cell Wall and Capsule;Gram-Negative cell wall components;KDO2-Lipid_A_biosynthesis;Oligosaccharide repeat unit polymerase Wzy;Oligosaccharide repeat unit polymerase Wzy	1	1	0	0	0.467612	0.481361	0.423708	0.437226
SEED;Metabolism of Aromatic Compounds;Peripheral pathways for catabolism of aromatic compounds;n-Phenylalkanoic_acid_degradation;n-Phenylalkanoic_acid_degradation	1	1	0	0	0.467612	0.481361	0.423708	0.437226
SEED;Metabolism of Aromatic Compounds;Peripheral pathways for catabolism of aromatic compounds;n-Phenylalkanoic_acid_degradation;Long-chain-fatty-acid--CoA ligase (EC 6.2.1.3);Long-chain-fatty-acid--CoA ligase (EC 6.2.1.3)	1	1	0	0	0.467612	0.481361	0.423708	0.437226
SEED;Metabolism of Aromatic Compounds;Metabolism of central aromatic intermediates;4-Hydroxyphenylacetic_acid_catabolic_pathway;2,4-dihydroxyhept-2-ene-1,7-dioic acid aldolase (EC 4.1.2.-);2,4-dihydroxyhept-2-ene-1,7-dioic acid aldolase (EC 4.1.2.-)	1	1	0	0	0.467612	0.481361	0.423708	0.437226
SEED;Miscellaneous;ZZ_gjo_need_homes;Transcription accessory protein (S1 RNA-binding domain);Transcription accessory protein (S1 RNA-binding domain)	1	1	0	0	0.467612	0.481361	0.423708	0.437226
SEED;Cell Division and Cell Cycle;Control of Macromolecuar Synthesis;Macromolecular_synthesis_operon;Carbamoyl-phosphate synthase small chain (EC 6.3.5.5);Carbamoyl-phosphate synthase small chain (EC 6.3.5.5)	1	1	0	0	0.467612	0.481361	0.423708	0.437226
SEED;Regulation and Cell signaling;Orphan_regulatory_proteins;Envelope stress sensory histidine kinase BaeS;Envelope stress sensory histidine kinase BaeS	1	1	0	0	0.467612	0.481361	0.423708	0.437226
SEED;Carbohydrates;Monosaccharides;D-Galacturonate_and_D-Glucuronate_Utilization;Alginate lyase precursor (EC 4.2.2.3);Alginate lyase precursor (EC 4.2.2.3)	0	1	0	0	1	0.481361	1	0.437226
SEED;Carbohydrates;Monosaccharides;D-gluconate_and_ketogluconates_metabolism;Gluconate 2-dehydrogenase (EC 1.1.99.3), membrane-bound, flavoprotein;Gluconate 2-dehydrogenase (EC 1.1.99.3), membrane-bound, flavoprotein	0	1	0	0	1	0.481361	1	0.437226
SEED;Carbohydrates;Monosaccharides;D-gluconate_and_ketogluconates_metabolism;Gluconate 2-dehydrogenase (EC 1.1.99.3), membrane-bound, cytochrome c;Gluconate 2-dehydrogenase (EC 1.1.99.3), membrane-bound, cytochrome c	0	1	0	0	1	0.481361	1	0.437226
SEED;Carbohydrates;Monosaccharides;D-gluconate_and_ketogluconates_metabolism;Gluconate 2-dehydrogenase (EC 1.1.99.3), membrane-bound, gamma subunit;Gluconate 2-dehydrogenase (EC 1.1.99.3), membrane-bound, gamma subunit	0	1	0	0	1	0.481361	1	0.437226
SEED;Carbohydrates;Monosaccharides;D-galactarate,_D-glucarate_and_D-glycerate_catabolism;D-galactarate permease;D-galactarate permease	0	1	0	0	1	0.481361	1	0.437226
SEED;Carbohydrates;Fermentation;Fermentations:_Lactate;L-lactate dehydrogenase (EC 1.1.1.27);L-lactate dehydrogenase (EC 1.1.1.27)	0	1	0	0	1	0.481361	1	0.437226
SEED;Carbohydrates;Sugar alcohols;Mannitol_Utilization;PTS system, mannitol-specific cryptic IIA component (EC 2.7.1.69);PTS system, mannitol-specific cryptic IIA component (EC 2.7.1.69)	0	1	0	0	1	0.481361	1	0.437226
SEED;Carbohydrates;Organic acids;Propionate-CoA_to_Succinate_Module;Propionate-CoA_to_Succinate_Module	0	1	0	0	1	0.481361	1	0.437226
SEED;Carbohydrates;Organic acids;Propionate-CoA_to_Succinate_Module;Aconitate hydratase 2 (EC 4.2.1.3);Aconitate hydratase 2 (EC 4.2.1.3)	0	1	0	0	1	0.481361	1	0.437226
SEED;Carbohydrates;Di- and oligosaccharides;Trehalose_Biosynthesis;Glucoamylase (EC 3.2.1.3);Glucoamylase (EC 3.2.1.3)	0	1	0	0	1	0.481361	1	0.437226
SEED;Cofactors, Vitamins, Prosthetic Groups, Pigments;Tetrapyrroles;Coenzyme_B12_biosynthesis;Cobyric acid synthase;Cobyric acid synthase	0	1	0	0	1	0.481361	1	0.437226
SEED;Cofactors, Vitamins, Prosthetic Groups, Pigments;Tetrapyrroles;Coenzyme_B12_biosynthesis;Adenosylcobinamide-phosphate guanylyltransferase (EC 2.7.7.62);Adenosylcobinamide-phosphate guanylyltransferase (EC 2.7.7.62)	0	1	0	0	1	0.481361	1	0.437226
SEED;Cofactors, Vitamins, Prosthetic Groups, Pigments;Tetrapyrroles;Coenzyme_B12_biosynthesis;Nicotinate-nucleotide--dimethylbenzimidazole phosphoribosyltransferase (EC 2.4.2.21);Nicotinate-nucleotide--dimethylbenzimidazole phosphoribosyltransferase (EC 2.4.2.21)	0	1	0	0	1	0.481361	1	0.437226
SEED;Cofactors, Vitamins, Prosthetic Groups, Pigments;Tetrapyrroles;Coenzyme_B12_biosynthesis;Alpha-ribazole-5'-phosphate phosphatase (EC 3.1.3.73);Alpha-ribazole-5'-phosphate phosphatase (EC 3.1.3.73)	0	1	0	0	1	0.481361	1	0.437226
SEED;Cofactors, Vitamins, Prosthetic Groups, Pigments;Tetrapyrroles;Coenzyme_B12_biosynthesis;Cobalamin synthase;Cobalamin synthase	0	1	0	0	1	0.481361	1	0.437226
SEED;Cofactors, Vitamins, Prosthetic Groups, Pigments;Tetrapyrroles;Cobalamin_synthesis;Cobyric acid synthase;Cobyric acid synthase	0	1	0	0	1	0.481361	1	0.437226
SEED;Cofactors, Vitamins, Prosthetic Groups, Pigments;Tetrapyrroles;Cobalamin_synthesis;Adenosylcobinamide-phosphate guanylyltransferase (EC 2.7.7.62);Adenosylcobinamide-phosphate guanylyltransferase (EC 2.7.7.62)	0	1	0	0	1	0.481361	1	0.437226
SEED;Cofactors, Vitamins, Prosthetic Groups, Pigments;Tetrapyrroles;Cobalamin_synthesis;Alpha-ribazole-5'-phosphate phosphatase (EC 3.1.3.73);Alpha-ribazole-5'-phosphate phosphatase (EC 3.1.3.73)	0	1	0	0	1	0.481361	1	0.437226
SEED;Cofactors, Vitamins, Prosthetic Groups, Pigments;Tetrapyrroles;Cobalamin_synthesis;Cobalamin synthase;Cobalamin synthase	0	1	0	0	1	0.481361	1	0.437226
SEED;Cofactors, Vitamins, Prosthetic Groups, Pigments;NAD and NADP;PnuC-like_transporters;Predicted N-ribosylNicotinamide CRP-like regulator;Predicted N-ribosylNicotinamide CRP-like regulator	0	1	0	0	1	0.481361	1	0.437226
SEED;Virulence;Resistance to antibiotics and toxic compounds;Multidrug_Resistance_Efflux_Pumps;Probable transcription regulator protein of MDR efflux pump cluster;Probable transcription regulator protein of MDR efflux pump cluster	0	1	0	0	1	0.481361	1	0.437226
SEED;Virulence;Resistance to antibiotics and toxic compounds;Aminoglycoside_adenylyltransferases;Aminoglycoside_adenylyltransferases	0	1	0	0	1	0.481361	1	0.437226
SEED;Virulence;Resistance to antibiotics and toxic compounds;Aminoglycoside_adenylyltransferases;Spectinomycin 9-O-adenylyltransferase;Spectinomycin 9-O-adenylyltransferase	0	1	0	0	1	0.481361	1	0.437226
SEED;Virulence;Resistance to antibiotics and toxic compounds;Copper_homeostasis;Cytochrome c heme lyase subunit CcmH;Cytochrome c heme lyase subunit CcmH	0	1	0	0	1	0.481361	1	0.437226
SEED;Virulence;Resistance to antibiotics and toxic compounds;Copper_homeostasis;Cytochrome c heme lyase subunit CcmF;Cytochrome c heme lyase subunit CcmF	0	1	0	0	1	0.481361	1	0.437226
SEED;Virulence;Resistance to antibiotics and toxic compounds;Integrons;Integrons	0	1	0	0	1	0.481361	1	0.437226
SEED;Virulence;Resistance to antibiotics and toxic compounds;Integrons;Integron integrase IntI1;Integron integrase IntI1	0	1	0	0	1	0.481361	1	0.437226
SEED;Virulence;Ton_and_Tol_transport_systems;Putative Ton-B dependent hemine receptor;Putative Ton-B dependent hemine receptor	0	1	0	0	1	0.481361	1	0.437226
SEED;Virulence;Ton_and_Tol_transport_systems;Putative tonB protein;Putative tonB protein	0	1	0	0	1	0.481361	1	0.437226
SEED;Virulence;Ton_and_Tol_transport_systems;Aerobactin siderophore receptor IutA;Aerobactin siderophore receptor IutA	0	1	0	0	1	0.481361	1	0.437226
SEED;Virulence;Iron Scavenging Mechanisms;Iron_acquisition_in_Vibrio;Transcriptional regulator near Vibriobactin biosynthetic gene custer;Transcriptional regulator near Vibriobactin biosynthetic gene custer	0	1	0	0	1	0.481361	1	0.437226
SEED;Virulence;Iron Scavenging Mechanisms;Iron_acquisition_in_Vibrio;Aerobactin siderophore receptor IutA;Aerobactin siderophore receptor IutA	0	1	0	0	1	0.481361	1	0.437226
SEED;Virulence;Iron Scavenging Mechanisms;Siderophore_Aerobactin;Aerobactin siderophore receptor IutA;Aerobactin siderophore receptor IutA	0	1	0	0	1	0.481361	1	0.437226
SEED;Virulence;Iron Scavenging Mechanisms;Transport_of_Iron;Iron-uptake factor PiuC;Iron-uptake factor PiuC	0	1	0	0	1	0.481361	1	0.437226
SEED;Sulfur Metabolism;Organic sulfur assimilation;Alkanesulfonate_assimilation;Putative arylsulfatase regulatory protein;Putative arylsulfatase regulatory protein	0	1	0	0	1	0.481361	1	0.437226
SEED;Sulfur Metabolism;Organic sulfur assimilation;Utilization_of_glutathione_as_a_sulphur_source;Putative glutathione transporter, ATP-binding component;Putative glutathione transporter, ATP-binding component	0	1	0	0	1	0.481361	1	0.437226
SEED;Stress Response;Oxidative stress;Glutathione:_Redox_cycle;Glutaredoxin 1;Glutaredoxin 1	0	1	0	0	1	0.481361	1	0.437226
SEED;Stress Response;Oxidative stress;Glutaredoxins;Glutaredoxin 1;Glutaredoxin 1	0	1	0	0	1	0.481361	1	0.437226
SEED;Stress Response;Osmotic stress;Choline_and_Betaine_Uptake_and_Betaine_Biosynthesis;Choline-sulfatase (EC 3.1.6.6);Choline-sulfatase (EC 3.1.6.6)	0	1	0	0	1	0.481361	1	0.437226
SEED;Protein Metabolism;Protein degradation;Proteolysis_in_bacteria,_ATP-dependent;ATP-dependent protease La (EC 3.4.21.53);ATP-dependent protease La (EC 3.4.21.53)	0	1	0	0	1	0.481361	1	0.437226
SEED;Protein Metabolism;Protein processing and modification;N-linked_Glycosylation_in_Bacteria;Lipid carrier : UDP-N-acetylgalactosaminyltransferase (EC 2.4.1.-);Lipid carrier : UDP-N-acetylgalactosaminyltransferase (EC 2.4.1.-)	0	1	0	0	1	0.481361	1	0.437226
SEED;Protein Metabolism;Secretion;Protein_secretion_by_ABC-type_exporters;Putative tonB protein;Putative tonB protein	0	1	0	0	1	0.481361	1	0.437226
SEED;Protein Metabolism;Protein folding;Periplasmic_disulfide_interchange;Cytochrome c-type biogenesis protein CcmG/DsbE, thiol:disulfide oxidoreductase;Cytochrome c-type biogenesis protein CcmG/DsbE, thiol:disulfide oxidoreductase	0	1	0	0	1	0.481361	1	0.437226
SEED;RNA Metabolism;RNA processing and modification;RNA_3'-terminal_phosphate_cyclase;Protein RtcB;Protein RtcB	0	1	0	0	1	0.481361	1	0.437226
SEED;RNA Metabolism;RNA processing and modification;RNA_3'-terminal_phosphate_cyclase;Transcriptional regulatory protein RtcR;Transcriptional regulatory protein RtcR	0	1	0	0	1	0.481361	1	0.437226
SEED;Amino Acids and Derivatives;Arginine; urea cycle, polyamines;Arginine_and_Ornithine_Degradation;Arginase (EC 3.5.3.1);Arginase (EC 3.5.3.1)	0	1	0	0	1	0.481361	1	0.437226
SEED;Amino Acids and Derivatives;Lysine, threonine, methionine, and cysteine.1;Threonine_degradation;Threonine dehydratase (EC 4.3.1.19);Threonine dehydratase (EC 4.3.1.19)	0	1	0	0	1	0.481361	1	0.437226
SEED;Amino Acids and Derivatives;Aromatic amino acids and derivatives;Aromatic_amino_acid_degradation;Tryptophanase (EC 4.1.99.1);Tryptophanase (EC 4.1.99.1)	0	1	0	0	1	0.481361	1	0.437226
SEED;Amino Acids and Derivatives;L-2-amino-thiazoline-4-carboxylic_acid-Lcysteine_conversion;L-2-amino-thiazoline-4-carboxylic_acid-Lcysteine_conversion	0	1	0	0	1	0.481361	1	0.437226
SEED;Amino Acids and Derivatives;L-2-amino-thiazoline-4-carboxylic_acid-Lcysteine_conversion;L-2-amino-thiazoline-4-carboxylic acid hydrolase (EC 3.5.2.-);L-2-amino-thiazoline-4-carboxylic acid hydrolase (EC 3.5.2.-)	0	1	0	0	1	0.481361	1	0.437226
SEED;Nitrogen Metabolism;Nitrate_and_nitrite_ammonification;Nitrite transporter NirC;Nitrite transporter NirC	0	1	0	0	1	0.481361	1	0.437226
SEED;Fatty Acids, Lipids, and Isoprenoids;Isoprenoids;Isoprenoid_Biosynthesis;Isopentenyl-diphosphate delta-isomerase, FMN-dependent (EC 5.3.3.2);Isopentenyl-diphosphate delta-isomerase, FMN-dependent (EC 5.3.3.2)	0	1	0	0	1	0.481361	1	0.437226
SEED;Fatty Acids, Lipids, and Isoprenoids;Isoprenoids;Carotenoids;Phytoene synthase (EC 2.5.1.32);Phytoene synthase (EC 2.5.1.32)	0	1	0	0	1	0.481361	1	0.437226
SEED;Fatty Acids, Lipids, and Isoprenoids;Isoprenoids;Carotenoids;Zeaxanthin glucosyl transferase;Zeaxanthin glucosyl transferase	0	1	0	0	1	0.481361	1	0.437226
SEED;Fatty Acids, Lipids, and Isoprenoids;Isoprenoids;Carotenoids;Lycopene cyclase;Lycopene cyclase	0	1	0	0	1	0.481361	1	0.437226
SEED;Fatty Acids, Lipids, and Isoprenoids;Isoprenoids;Carotenoids;Phytoene dehydrogenase (EC 1.14.99.-);Phytoene dehydrogenase (EC 1.14.99.-)	0	1	0	0	1	0.481361	1	0.437226
SEED;Nucleosides and Nucleotides;Purines;Purine_nucleotide_synthesis_regulator;Purine_nucleotide_synthesis_regulator	0	1	0	0	1	0.481361	1	0.437226
SEED;Nucleosides and Nucleotides;Purines;Purine_nucleotide_synthesis_regulator;Purine nucleotide synthesis repressor;Purine nucleotide synthesis repressor	0	1	0	0	1	0.481361	1	0.437226
SEED;Nucleosides and Nucleotides;Pyrimidines;Pyrimidine_utilization;Beta-ureidopropionase (EC 3.5.1.6);Beta-ureidopropionase (EC 3.5.1.6)	0	1	0	0	1	0.481361	1	0.437226
SEED;Nucleosides and Nucleotides;Purine_Utilization;Periplasmic aromatic aldehyde oxidoreductase, FAD binding subunit YagS;Periplasmic aromatic aldehyde oxidoreductase, FAD binding subunit YagS	0	1	0	0	1	0.481361	1	0.437226
SEED;Nucleosides and Nucleotides;Purine_Utilization;Xanthine dehydrogenase, molybdenum binding subunit (EC 1.17.1.4);Xanthine dehydrogenase, molybdenum binding subunit (EC 1.17.1.4)	0	1	0	0	1	0.481361	1	0.437226
SEED;Nucleosides and Nucleotides;Purine_Utilization;Xanthine dehydrogenase iron-sulfur subunit (EC 1.17.1.4);Xanthine dehydrogenase iron-sulfur subunit (EC 1.17.1.4)	0	1	0	0	1	0.481361	1	0.437226
SEED;Cell Wall and Capsule;Capsular and extracellular polysacchrides;Serotype_determining_Capsular_polysaccharide_biosynthesis_in_Staphylococcus;Serotype_determining_Capsular_polysaccharide_biosynthesis_in_Staphylococcus	0	1	0	0	1	0.481361	1	0.437226
SEED;Cell Wall and Capsule;Capsular and extracellular polysacchrides;Serotype_determining_Capsular_polysaccharide_biosynthesis_in_Staphylococcus;Capsular polysaccharide synthesis enzyme Cap5H;Capsular polysaccharide synthesis enzyme Cap5H	0	1	0	0	1	0.481361	1	0.437226
SEED;Cell Wall and Capsule;Capsular and extracellular polysacchrides;Capsular_heptose_biosynthesis;D-glycero-D-manno-heptose 1-phosphate guanosyltransferase;D-glycero-D-manno-heptose 1-phosphate guanosyltransferase	0	1	0	0	1	0.481361	1	0.437226
SEED;Cell Wall and Capsule;Capsular and extracellular polysacchrides;Capsular_heptose_biosynthesis;GDP-L-fucose synthetase (EC 1.1.1.271);GDP-L-fucose synthetase (EC 1.1.1.271)	0	1	0	0	1	0.481361	1	0.437226
SEED;Cell Wall and Capsule;Capsular and extracellular polysacchrides;CMP-N-acetylneuraminate_Biosynthesis;N-acetylneuraminate synthase (EC 2.5.1.56);N-acetylneuraminate synthase (EC 2.5.1.56)	0	1	0	0	1	0.481361	1	0.437226
SEED;Cell Wall and Capsule;Capsular and extracellular polysacchrides;Sialic_Acid_Metabolism;Putative sugar isomerase involved in processing of exogenous sialic acid;Putative sugar isomerase involved in processing of exogenous sialic acid	0	1	0	0	1	0.481361	1	0.437226
SEED;Cell Wall and Capsule;Peptidoglycan_Biosynthesis;Murein-DD-endopeptidase (EC 3.4.99.-);Murein-DD-endopeptidase (EC 3.4.99.-)	0	1	0	0	1	0.481361	1	0.437226
SEED;Cell Wall and Capsule;Gram-Negative cell wall components;Lipid_A_modifications;UPF0141 membrane protein YijP possibly required for phosphoethanolamine modification of lipopolysaccharide;UPF0141 membrane protein YijP possibly required for phosphoethanolamine modification of lipopolysaccharide	0	1	0	0	1	0.481361	1	0.437226
SEED;Cell Wall and Capsule;Gram-Negative cell wall components;Lipid_A-Ara4N_pathway_(_Polymyxin_resistance_);UDP-4-amino-4-deoxy-L-arabinose--oxoglutarate aminotransferase (EC 2.6.1.-);UDP-4-amino-4-deoxy-L-arabinose--oxoglutarate aminotransferase (EC 2.6.1.-)	0	1	0	0	1	0.481361	1	0.437226
SEED;Cell Wall and Capsule;Gram-Negative cell wall components;KDO2-Lipid_A_biosynthesis;UDP-N-acetylglucosamine 4-epimerase (EC 5.1.3.7);UDP-N-acetylglucosamine 4-epimerase (EC 5.1.3.7)	0	1	0	0	1	0.481361	1	0.437226
SEED;Cell Wall and Capsule;Gram-Negative cell wall components;LOS_core_oligosaccharide_biosynthesis;Lipopolysaccharide core biosynthesis protein WaaP (EC 2.7.-.-), heptosyl-I-kinase;Lipopolysaccharide core biosynthesis protein WaaP (EC 2.7.-.-), heptosyl-I-kinase	0	1	0	0	1	0.481361	1	0.437226
SEED;Cell Wall and Capsule;Gram-Negative cell wall components;LOS_core_oligosaccharide_biosynthesis;Lipopolysaccharide core biosynthesis protein RfaY;Lipopolysaccharide core biosynthesis protein RfaY	0	1	0	0	1	0.481361	1	0.437226
SEED;Cell Wall and Capsule;Gram-Negative cell wall components;LOS_core_oligosaccharide_biosynthesis;UDP-glucose:(glucosyl)lipopolysaccharide alpha-1,3-glucosyltransferase WaaO (EC 2.4.1.-);UDP-glucose:(glucosyl)lipopolysaccharide alpha-1,3-glucosyltransferase WaaO (EC 2.4.1.-)	0	1	0	0	1	0.481361	1	0.437226
SEED;Cell Wall and Capsule;Gram-Negative cell wall components;LOS_core_oligosaccharide_biosynthesis;UDP-galactose:(galactosyl) LPS alpha1,2-galactosyltransferase WaaW (EC 2.4.1.-);UDP-galactose:(galactosyl) LPS alpha1,2-galactosyltransferase WaaW (EC 2.4.1.-)	0	1	0	0	1	0.481361	1	0.437226
SEED;Cell Wall and Capsule;Gram-Negative cell wall components;LOS_core_oligosaccharide_biosynthesis;Lipopolysaccharide 1,2-N-acetylglucosaminetransferase (EC 2.4.1.56);Lipopolysaccharide 1,2-N-acetylglucosaminetransferase (EC 2.4.1.56)	0	1	0	0	1	0.481361	1	0.437226
SEED;Cell Wall and Capsule;Cell wall of Mycobacteria;linker_unit-arabinogalactan_synthesis;UDP-glucose 4-epimerase (EC 5.1.3.2);UDP-glucose 4-epimerase (EC 5.1.3.2)	0	1	0	0	1	0.481361	1	0.437226
SEED;Phages, Prophages, Transposable elements;Staphylococcal_phi-Mu50B-like_prophages;Hypothetical protein, PV83 orf 20 homolog [SA bacteriophages 11, Mu50B];Hypothetical protein, PV83 orf 20 homolog [SA bacteriophages 11, Mu50B]	0	1	0	0	1	0.481361	1	0.437226
SEED;Respiration;Electron donating reactions;Respiratory_dehydrogenases_1;D-amino acid dehydrogenase large subunit (EC 1.4.99.1);D-amino acid dehydrogenase large subunit (EC 1.4.99.1)	0	1	0	0	1	0.481361	1	0.437226
SEED;Respiration;Biogenesis_of_c-type_cytochromes;ABC transporter involved in cytochrome c biogenesis, ATPase component CcmA;ABC transporter involved in cytochrome c biogenesis, ATPase component CcmA	0	1	0	0	1	0.481361	1	0.437226
SEED;Respiration;Biogenesis_of_c-type_cytochromes;ABC transporter involved in cytochrome c biogenesis, CcmB subunit;ABC transporter involved in cytochrome c biogenesis, CcmB subunit	0	1	0	0	1	0.481361	1	0.437226
SEED;Respiration;Biogenesis_of_c-type_cytochromes;Cytochrome c-type biogenesis protein CcmC, putative heme lyase for CcmE;Cytochrome c-type biogenesis protein CcmC, putative heme lyase for CcmE	0	1	0	0	1	0.481361	1	0.437226
SEED;Respiration;Biogenesis_of_c-type_cytochromes;Cytochrome c-type biogenesis protein CcmE, heme chaperone;Cytochrome c-type biogenesis protein CcmE, heme chaperone	0	1	0	0	1	0.481361	1	0.437226
SEED;Respiration;Biogenesis_of_c-type_cytochromes;Cytochrome c-type biogenesis protein CcmD, interacts with CcmCE;Cytochrome c-type biogenesis protein CcmD, interacts with CcmCE	0	1	0	0	1	0.481361	1	0.437226
SEED;Respiration;Biogenesis_of_c-type_cytochromes;Cytochrome c heme lyase subunit CcmF;Cytochrome c heme lyase subunit CcmF	0	1	0	0	1	0.481361	1	0.437226
SEED;Respiration;Biogenesis_of_c-type_cytochromes;Cytochrome c heme lyase subunit CcmL;Cytochrome c heme lyase subunit CcmL	0	1	0	0	1	0.481361	1	0.437226
SEED;Respiration;Biogenesis_of_c-type_cytochromes;Cytochrome c heme lyase subunit CcmH;Cytochrome c heme lyase subunit CcmH	0	1	0	0	1	0.481361	1	0.437226
SEED;Respiration;Biogenesis_of_c-type_cytochromes;Cytochrome c-type biogenesis protein CcmG/DsbE, thiol:disulfide oxidoreductase;Cytochrome c-type biogenesis protein CcmG/DsbE, thiol:disulfide oxidoreductase	0	1	0	0	1	0.481361	1	0.437226
SEED;Miscellaneous;ZZ_gjo_need_homes;Protein of unknown function DUF81;Protein of unknown function DUF81	0	1	0	0	1	0.481361	1	0.437226
SEED;Miscellaneous;ZZ_gjo_need_homes;Pole remodelling regulatory diguanylate cyclase;Pole remodelling regulatory diguanylate cyclase	0	1	0	0	1	0.481361	1	0.437226
SEED;Miscellaneous;ZZ_gjo_need_homes;Pyrrolidone-carboxylate peptidase (EC 3.4.19.3);Pyrrolidone-carboxylate peptidase (EC 3.4.19.3)	0	1	0	0	1	0.481361	1	0.437226
SEED;Miscellaneous;Muconate_lactonizing_enzyme_family;L-alanine-DL-glutamate epimerase;L-alanine-DL-glutamate epimerase	0	1	0	0	1	0.481361	1	0.437226
SEED;Regulation and Cell signaling;Programmed Cell Death and Toxin-antitoxin Systems;MazEF_toxin-antitoxing_(programmed_cell_death)_system;Programmed cell death antitoxin ChpS;Programmed cell death antitoxin ChpS	0	1	0	0	1	0.481361	1	0.437226
SEED;Regulation and Cell signaling;Programmed Cell Death and Toxin-antitoxin Systems;MazEF_toxin-antitoxing_(programmed_cell_death)_system;Programmed cell death toxin ChpB;Programmed cell death toxin ChpB	0	1	0	0	1	0.481361	1	0.437226
SEED;Regulation and Cell signaling;Orphan_regulatory_proteins;Two-component oxygen-sensor histidine kinase FixL;Two-component oxygen-sensor histidine kinase FixL	0	1	0	0	1	0.481361	1	0.437226
SEED;Regulation and Cell signaling;Orphan_regulatory_proteins;Two-component nitrogen fixation transcriptional regulator FixJ;Two-component nitrogen fixation transcriptional regulator FixJ	0	1	0	0	1	0.481361	1	0.437226
SEED;Regulation and Cell signaling;cAMP_signaling_in_bacteria;Prophage Clp protease-like protein;Prophage Clp protease-like protein	0	1	0	0	1	0.481361	1	0.437226
SEED;Metabolism of Aromatic Compounds;Metabolism of central aromatic intermediates;Protocatechuate_branch_of_beta-ketoadipate_pathway;Protocatechuate_branch_of_beta-ketoadipate_pathway	0	1	3	0	0.253104	0.625976	1	0.437226
SEED;Metabolism of Aromatic Compounds;Metabolism of central aromatic intermediates;Protocatechuate_branch_of_beta-ketoadipate_pathway;4-carboxymuconolactone decarboxylase (EC 4.1.1.44);4-carboxymuconolactone decarboxylase (EC 4.1.1.44)	0	1	3	0	0.253104	0.625976	1	0.437226
SEED;Carbohydrates;Monosaccharides;L-fucose_utilization;L-fucose_utilization	1	1	1	0	1	1	0.423708	0.437226
SEED;Carbohydrates;Monosaccharides;L-fucose_utilization;L-fucose operon activator;L-fucose operon activator	1	1	1	0	1	1	0.423708	0.437226
SEED;Carbohydrates;Fermentation;Butanol_Biosynthesis;Alcohol dehydrogenase (EC 1.1.1.1); Acetaldehyde dehydrogenase (EC 1.2.1.10);Alcohol dehydrogenase (EC 1.1.1.1); Acetaldehyde dehydrogenase (EC 1.2.1.10)	1	1	1	0	1	1	0.423708	0.437226
SEED;Carbohydrates;Sugar alcohols;Mannitol_Utilization;Mannitol-1-phosphate 5-dehydrogenase (EC 1.1.1.17);Mannitol-1-phosphate 5-dehydrogenase (EC 1.1.1.17)	1	1	1	0	1	1	0.423708	0.437226
SEED;Carbohydrates;Central carbohydrate metabolism;Glycolysis_and_Gluconeogenesis,_including_Archaeal_enzymes;Glucose-6-phosphate isomerase (EC 5.3.1.9);Glucose-6-phosphate isomerase (EC 5.3.1.9)	1	1	1	0	1	1	0.423708	0.437226
SEED;Cofactors, Vitamins, Prosthetic Groups, Pigments;Tetrapyrroles;Coenzyme_B12_biosynthesis;Cobyrinic acid A,C-diamide synthase;Cobyrinic acid A,C-diamide synthase	0	1	1	0	1	1	1	0.437226
SEED;Cofactors, Vitamins, Prosthetic Groups, Pigments;Tetrapyrroles;Coenzyme_B12_biosynthesis;Outer membrane vitamin B12 receptor BtuB;Outer membrane vitamin B12 receptor BtuB	1	1	1	0	1	1	0.423708	0.437226
SEED;Cofactors, Vitamins, Prosthetic Groups, Pigments;Tetrapyrroles;Cobalamin_synthesis;Cobyrinic acid A,C-diamide synthase;Cobyrinic acid A,C-diamide synthase	0	1	1	0	1	1	1	0.437226
SEED;Cofactors, Vitamins, Prosthetic Groups, Pigments;NAD and NADP;NAD_and_NADP_cofactor_biosynthesis_global;Amidases related to nicotinamidase;Amidases related to nicotinamidase	1	1	1	0	1	1	0.423708	0.437226
SEED;Virulence;Iron Scavenging Mechanisms;Campylobacter_Iron_Metabolism;Nonheme iron-containing ferritin;Nonheme iron-containing ferritin	1	1	1	0	1	1	0.423708	0.437226
SEED;Virulence;Iron Scavenging Mechanisms;Hemin_transport_system;Hemin uptake protein HemP;Hemin uptake protein HemP	1	1	1	0	1	1	0.423708	0.437226
SEED;Virulence;Siderophore_Enterobactin;Ferric enterobactin uptake protein FepE;Ferric enterobactin uptake protein FepE	1	1	1	0	1	1	0.423708	0.437226
SEED;Stress Response;Oxidative stress;Glutathionylspermidine_and_Trypanothione;Uncharacterized GST-like protein yghU associated with glutathionylspermidine synthetase/amidase;Uncharacterized GST-like protein yghU associated with glutathionylspermidine synthetase/amidase	0	1	1	0	1	1	1	0.437226
SEED;Stress Response;Oxidative stress;Glutathione:_Non-redox_reactions;Uncharacterized GST-like protein yghU associated with glutathionylspermidine synthetase/amidase;Uncharacterized GST-like protein yghU associated with glutathionylspermidine synthetase/amidase	0	1	1	0	1	1	1	0.437226
SEED;Protein Metabolism;Protein biosynthesis;Ribosome_activity_modulation;Ribosome hibernation protein YhbH;Ribosome hibernation protein YhbH	1	1	1	0	1	1	0.423708	0.437226
SEED;RNA Metabolism;Transcription;Rrf2_family_transcriptional_regulators;Predicted transcriptional regulator of NADH dehydrogenase, Rrf2 family;Predicted transcriptional regulator of NADH dehydrogenase, Rrf2 family	1	1	1	0	1	1	0.423708	0.437226
SEED;Motility and Chemotaxis;Bacterial_Chemotaxis;Methyl-accepting chemotaxis protein IV (dipeptide chemoreceptor protein);Methyl-accepting chemotaxis protein IV (dipeptide chemoreceptor protein)	1	1	1	0	1	1	0.423708	0.437226
SEED;Amino Acids and Derivatives;Arginine; urea cycle, polyamines;Polyamine_Metabolism;Biosynthetic arginine decarboxylase (EC 4.1.1.19);Biosynthetic arginine decarboxylase (EC 4.1.1.19)	1	1	1	0	1	1	0.423708	0.437226
SEED;Amino Acids and Derivatives;Arginine; urea cycle, polyamines;Arginine_Biosynthesis_extended;Acetylglutamate kinase (EC 2.7.2.8);Acetylglutamate kinase (EC 2.7.2.8)	1	1	1	0	1	1	0.423708	0.437226
SEED;Amino Acids and Derivatives;Alanine, serine, and glycine;Glycine_Biosynthesis;Serine hydroxymethyltransferase (EC 2.1.2.1);Serine hydroxymethyltransferase (EC 2.1.2.1)	1	1	1	0	1	1	0.423708	0.437226
SEED;Nitrogen Metabolism;Ammonia_assimilation;Glutamate synthase [NADPH] large chain (EC 1.4.1.13);Glutamate synthase [NADPH] large chain (EC 1.4.1.13)	1	1	1	0	1	1	0.423708	0.437226
SEED;Clustering-based subsystems;Bacterial_Cell_Division;Cell division protein FtsH (EC 3.4.24.-);Cell division protein FtsH (EC 3.4.24.-)	1	1	1	0	1	1	0.423708	0.437226
SEED;DNA Metabolism;DNA replication;DNA-replication;DNA polymerase III delta prime subunit (EC 2.7.7.7);DNA polymerase III delta prime subunit (EC 2.7.7.7)	1	1	1	0	1	1	0.423708	0.437226
SEED;Respiration;Electron accepting reactions;Terminal_cytochrome_d_ubiquinol_oxidases;Cytochrome d ubiquinol oxidase subunit I (EC 1.10.3.-);Cytochrome d ubiquinol oxidase subunit I (EC 1.10.3.-)	1	1	1	0	1	1	0.423708	0.437226
SEED;Respiration;Electron accepting reactions;Terminal_cytochrome_oxidases;Cytochrome d ubiquinol oxidase subunit I (EC 1.10.3.-);Cytochrome d ubiquinol oxidase subunit I (EC 1.10.3.-)	1	1	1	0	1	1	0.423708	0.437226
SEED;Regulation and Cell signaling;Antibacterial peptides;Antibacterial peptides	0	1	1	0	1	1	1	0.437226
SEED;Regulation and Cell signaling;Antibacterial peptides;Bacteriocin-like_peptides_Blp;Bacteriocin-like_peptides_Blp	0	1	1	0	1	1	1	0.437226
SEED;Regulation and Cell signaling;Antibacterial peptides;Bacteriocin-like_peptides_Blp;Bacteriocin;Bacteriocin	0	1	1	0	1	1	1	0.437226
SEED;Regulation and Cell signaling;Orphan_regulatory_proteins;Putative sensor-like histidine kinase YfhK;Putative sensor-like histidine kinase YfhK	1	1	1	0	1	1	0.423708	0.437226
SEED;Phosphorus Metabolism;Phosphate_metabolism;Alkaline phosphatase (EC 3.1.3.1);Alkaline phosphatase (EC 3.1.3.1)	0	1	1	0	1	1	1	0.437226
SEED;DNA Metabolism;DNA repair;DNA_repair,_bacterial;DNA_repair,_bacterial	28	30	26	31	0.495272	0.424632	0.431396	0.437845
SEED;Protein Metabolism;Protein biosynthesis;Ribosome_biogenesis_bacterial;Ribosome_biogenesis_bacterial	14	14	12	13	0.556283	0.695093	0.335162	0.439981
SEED;Carbohydrates;One-carbon Metabolism;One-carbon Metabolism	17	14	16	13	0.604328	1	0.13854	0.439981
SEED;Carbohydrates;Central carbohydrate metabolism;Pentose_phosphate_pathway;Pentose_phosphate_pathway	12	14	15	13	0.849138	1	0.686089	0.439981
SEED;Nucleosides and Nucleotides;Detoxification.1;Detoxification.1	13	14	16	13	0.854767	1	0.434736	0.439981
SEED;Carbohydrates;Aminosugars;Chitin_and_N-acetylglucosamine_utilization;Chitin_and_N-acetylglucosamine_utilization	15	15	15	14	0.719069	0.856856	0.348796	0.45448
SEED;Protein Metabolism;Protein biosynthesis;Ribosome_LSU_bacterial;Ribosome_LSU_bacterial	31	32	33	34	0.802673	0.901209	0.450145	0.456802
SEED;Cofactors, Vitamins, Prosthetic Groups, Pigments;Coenzyme A;Coenzyme A	9	9	8	8	0.634844	0.809569	0.463211	0.471517
SEED;Cofactors, Vitamins, Prosthetic Groups, Pigments;Coenzyme A;Coenzyme_A_Biosynthesis;Coenzyme_A_Biosynthesis	9	9	8	8	0.634844	0.809569	0.463211	0.471517
SEED;Virulence;Iron Scavenging Mechanisms;Campylobacter_Iron_Metabolism;Campylobacter_Iron_Metabolism	5	9	9	8	0.437504	1	1	0.471517
SEED;Cofactors, Vitamins, Prosthetic Groups, Pigments;Biotin;Biotin	9	9	9	8	0.816831	1	0.463211	0.471517
SEED;Cofactors, Vitamins, Prosthetic Groups, Pigments;Biotin;Biotin_biosynthesis;Biotin_biosynthesis	9	9	9	8	0.816831	1	0.463211	0.471517
SEED;Fatty Acids, Lipids, and Isoprenoids;Isoprenoids;Isoprenoid_Biosynthesis;Isoprenoid_Biosynthesis	9	9	9	8	0.816831	1	0.463211	0.471517
SEED;Clustering-based subsystems;LMPTP_YwlE_cluster;LMPTP_YwlE_cluster	3	2	3	5	1	1	1	0.478563
SEED;Cell Wall and Capsule;Gram-Negative cell wall components;Lipid_A-Ara4N_pathway_(_Polymyxin_resistance_);Lipid_A-Ara4N_pathway_(_Polymyxin_resistance_)	1	2	6	6	0.130467	0.291655	0.250622	0.478985
SEED;Cell Division and Cell Cycle;Cell cycle in Prokaryota;Two_cell_division_clusters_relating_to_chromosome_partitioning;Two_cell_division_clusters_relating_to_chromosome_partitioning	3	2	2	6	0.669966	1	0.741771	0.478985
SEED;Stress Response;Oxidative stress;Glutathione:_Non-redox_reactions;Glutathione:_Non-redox_reactions	9	10	9	9	0.816831	0.81932	0.634361	0.491394
SEED;Protein Metabolism;Protein biosynthesis;Universal_GTPases;Universal_GTPases	17	17	19	17	1	1	0.388567	0.491655
SEED;Metabolism of Aromatic Compounds;Metabolism of central aromatic intermediates;Metabolism of central aromatic intermediates	16	18	21	18	0.742511	0.873088	0.605098	0.502226
SEED;Amino Acids and Derivatives;Arginine; urea cycle, polyamines;Urea_decomposition;Urea carboxylase-related aminomethyltransferase (EC 2.1.2.10);Urea carboxylase-related aminomethyltransferase (EC 2.1.2.10)	0	0	4	2	0.128117	0.125989	0.511635	0.507868
SEED;Fatty Acids, Lipids, and Isoprenoids;Polyhydroxybutyrate_metabolism;Polyhydroxybutyrate_metabolism	0	0	3	2	0.253104	0.250983	0.511635	0.507868
SEED;Carbohydrates;Sugar alcohols;Inositol_catabolism;Myo-inositol 2-dehydrogenase (EC 1.1.1.18);Myo-inositol 2-dehydrogenase (EC 1.1.1.18)	0	0	2	2	0.502063	0.500651	0.511635	0.507868
SEED;Protein Metabolism;Protein biosynthesis;Universal_GTPases;Translation elongation factor Tu;Translation elongation factor Tu	0	0	2	2	0.502063	0.500651	0.511635	0.507868
SEED;Nucleosides and Nucleotides;Hydantoin_metabolism;Hydantoin_metabolism	0	0	2	2	0.502063	0.500651	0.511635	0.507868
SEED;Virulence;Resistance to antibiotics and toxic compounds;Multidrug_Resistance_Efflux_Pumps;RND efflux system, membrane fusion protein CmeA;RND efflux system, membrane fusion protein CmeA	3	0	2	2	0.669966	0.500651	0.656312	0.507868
SEED;Virulence;Resistance to antibiotics and toxic compounds;Multidrug_efflux_pump_in_Campylobacter_jejuni_(CmeABC_operon);RND efflux system, membrane fusion protein CmeA;RND efflux system, membrane fusion protein CmeA	3	0	2	2	0.669966	0.500651	0.656312	0.507868
SEED;Carbohydrates;Monosaccharides;D-Sorbitol(D-Glucitol)_and_L-Sorbose_Utilization;Glucitol operon repressor;Glucitol operon repressor	1	0	2	2	1	0.500651	1	0.507868
SEED;Virulence;Iron Scavenging Mechanisms;Iron_acquisition_in_Vibrio;Citrate:6-N-acetyl-6-N-hydroxy-L-lysine ligase, alpha subunit (EC 6.3.2.27), aerobactin biosynthesis protein IucA;Citrate:6-N-acetyl-6-N-hydroxy-L-lysine ligase, alpha subunit (EC 6.3.2.27), aerobactin biosynthesis protein IucA	2	0	2	2	1	0.500651	1	0.507868
SEED;Virulence;Resistance to antibiotics and toxic compounds;Copper_homeostasis;Multicopper oxidase;Multicopper oxidase	0	0	0	2	1	1	0.511635	0.507868
SEED;Virulence;Resistance to antibiotics and toxic compounds;Copper_homeostasis;CopG protein;CopG protein	0	0	0	2	1	1	0.511635	0.507868
SEED;Virulence;Resistance to antibiotics and toxic compounds;Copper_homeostasis;Copper resistance protein B;Copper resistance protein B	0	0	0	2	1	1	0.511635	0.507868
SEED;Virulence;Resistance to antibiotics and toxic compounds;Copper_homeostasis;Copper resistance protein C precursor;Copper resistance protein C precursor	0	0	0	2	1	1	0.511635	0.507868
SEED;Virulence;Type III, Type IV, Type VI, ESAT secretion systems;Type_IV_pilus;Type IV pilus biogenesis protein PilP;Type IV pilus biogenesis protein PilP	1	0	1	2	1	1	1	0.507868
SEED;Stress Response;Oxidative stress;Glutathione:_Redox_cycle;Glutaredoxin;Glutaredoxin	1	0	1	2	1	1	1	0.507868
SEED;Stress Response;Oxidative stress;Glutaredoxins;Glutaredoxin;Glutaredoxin	1	0	1	2	1	1	1	0.507868
SEED;RNA Metabolism;Transcription;Transcription_initiation,_bacterial_sigma_factors;RNA polymerase sigma factor SigZ;RNA polymerase sigma factor SigZ	0	0	0	2	1	1	0.511635	0.507868
SEED;Motility and Chemotaxis;Flagellar motility in Prokaryota;Flagellum;Flagellar hook-associated protein FlgL;Flagellar hook-associated protein FlgL	1	0	1	2	1	1	1	0.507868
SEED;Amino Acids and Derivatives;Arginine; urea cycle, polyamines;Arginine_and_Ornithine_Degradation;Arginine deiminase (EC 3.5.3.6);Arginine deiminase (EC 3.5.3.6)	1	0	1	2	1	1	1	0.507868
SEED;Amino Acids and Derivatives;Lysine, threonine, methionine, and cysteine.1;Threonine_anaerobic_catabolism_gene_cluster;Threonine catabolic operon transcriptional activator TdcA;Threonine catabolic operon transcriptional activator TdcA	1	0	1	2	1	1	1	0.507868
SEED;Clustering-based subsystems;CBSS-261594.1.peg.2640;CBSS-261594.1.peg.2640	0	0	1	2	1	1	0.511635	0.507868
SEED;Clustering-based subsystems;CBSS-261594.1.peg.2640;Protein of unknown function DUF156;Protein of unknown function DUF156	0	0	1	2	1	1	0.511635	0.507868
SEED;Cell Wall and Capsule;Capsular and extracellular polysacchrides;Pseudaminic_Acid_Biosynthesis;Pseudaminic acid cytidylyltransferase (EC 2.7.7.43);Pseudaminic acid cytidylyltransferase (EC 2.7.7.43)	0	0	0	2	1	1	0.511635	0.507868
SEED;Cell Wall and Capsule;Capsular and extracellular polysacchrides;Capsular_surface_virulence_antigen_loci;Insertion element IS1 protein insA;Insertion element IS1 protein insA	0	0	0	2	1	1	0.511635	0.507868
SEED;DNA Metabolism;DNA replication;Plasmid_replication;Chromosome (plasmid) partitioning protein ParA;Chromosome (plasmid) partitioning protein ParA	0	0	0	2	1	1	0.511635	0.507868
SEED;DNA Metabolism;DNA replication;Plasmid_replication;Chromosome (plasmid) partitioning protein ParB;Chromosome (plasmid) partitioning protein ParB	0	0	0	2	1	1	0.511635	0.507868
SEED;Respiration;Electron donating reactions;NiFe_hydrogenase_maturation;[NiFe] hydrogenase metallocenter assembly protein HypF;[NiFe] hydrogenase metallocenter assembly protein HypF	1	0	1	2	1	1	1	0.507868
SEED;Cell Division and Cell Cycle;Cell cycle in Prokaryota;Bacterial_Cytoskeleton;Chromosome (plasmid) partitioning protein ParA;Chromosome (plasmid) partitioning protein ParA	0	0	0	2	1	1	0.511635	0.507868
SEED;Cell Division and Cell Cycle;Cell cycle in Prokaryota;Bacterial_Cytoskeleton;Chromosome (plasmid) partitioning protein ParB;Chromosome (plasmid) partitioning protein ParB	0	0	0	2	1	1	0.511635	0.507868
SEED;Cell Division and Cell Cycle;Cell cycle in Prokaryota;Two_cell_division_clusters_relating_to_chromosome_partitioning;Chromosome (plasmid) partitioning protein ParA;Chromosome (plasmid) partitioning protein ParA	0	0	0	2	1	1	0.511635	0.507868
SEED;Cell Division and Cell Cycle;Cell cycle in Prokaryota;Two_cell_division_clusters_relating_to_chromosome_partitioning;Chromosome (plasmid) partitioning protein ParB;Chromosome (plasmid) partitioning protein ParB	0	0	0	2	1	1	0.511635	0.507868
SEED;RNA Metabolism;Transcription;Transcription_factors_bacterial;Transcription_factors_bacterial	11	11	10	10	0.665033	0.827752	0.382346	0.510512
SEED;Carbohydrates;One-carbon Metabolism;Serine-glyoxylate_cycle;Serine-glyoxylate_cycle	14	11	11	10	0.423745	1	0.146895	0.510512
SEED;Carbohydrates;Central carbohydrate metabolism;Pyruvate_metabolism_II:_acetyl-CoA,_acetogenesis_from_pyruvate;Pyruvate_metabolism_II:_acetyl-CoA,_acetogenesis_from_pyruvate	10	11	11	10	1	1	0.504959	0.510512
SEED;Respiration;Soluble_cytochromes_and_functionally_related_electron_carriers;Soluble_cytochromes_and_functionally_related_electron_carriers	5	5	4	4	0.742212	0.746033	0.507644	0.516879
SEED;Carbohydrates;Fermentation;Fermentations:_Mixed_acid;Fermentations:_Mixed_acid	4	5	4	4	1	0.746033	0.72913	0.516879
SEED;Stress Response;Osmotic stress;Osmotic stress	4	5	4	4	1	0.746033	0.72913	0.516879
SEED;Stress Response;Osmotic stress;Choline_and_Betaine_Uptake_and_Betaine_Biosynthesis;Choline_and_Betaine_Uptake_and_Betaine_Biosynthesis	4	5	4	4	1	0.746033	0.72913	0.516879
SEED;Protein Metabolism;Protein degradation;Proteasome_bacterial;Proteasome_bacterial	4	5	4	4	1	0.746033	0.72913	0.516879
SEED;Amino Acids and Derivatives;Alanine, serine, and glycine;Serine_Biosynthesis;Serine_Biosynthesis	4	5	4	4	1	0.746033	0.72913	0.516879
SEED;Fatty Acids, Lipids, and Isoprenoids;Phospholipids;Glycerolipid_and_Glycerophospholipid_Metabolism_in_Bacteria;Alcohol dehydrogenase (EC 1.1.1.1);Alcohol dehydrogenase (EC 1.1.1.1)	3	5	4	4	1	0.746033	1	0.516879
SEED;Metabolism of Aromatic Compounds;Metabolism of central aromatic intermediates;Homogentisate_pathway_of_aromatic_compound_degradation;Homogentisate_pathway_of_aromatic_compound_degradation	4	5	4	4	1	0.746033	0.72913	0.516879
SEED;Metabolism of Aromatic Compounds;Metabolism of central aromatic intermediates;Homogentisate_pathway_of_aromatic_compound_degradation;Transcriptional regulator, IclR family;Transcriptional regulator, IclR family	4	5	4	4	1	0.746033	0.72913	0.516879
SEED;Virulence;Siderophore_Enterobactin;Siderophore_Enterobactin	12	12	12	11	0.838727	1	0.400063	0.52877
SEED;Respiration;Electron accepting reactions;Terminal_cytochrome_oxidases;Terminal_cytochrome_oxidases	12	12	12	11	0.838727	1	0.400063	0.52877
SEED;Respiration;Electron accepting reactions;Anaerobic_respiratory_reductases;Anaerobic_respiratory_reductases	12	12	10	12	0.524586	0.670399	0.536192	0.543947
SEED;Amino Acids and Derivatives;Histidine Metabolism;Histidine Metabolism	12	12	11	12	0.677899	0.835139	0.536192	0.543947
SEED;Cofactors, Vitamins, Prosthetic Groups, Pigments;Folate and pterines;Folate_Biosynthesis;Folate_Biosynthesis	11	12	11	12	0.8322	0.835139	0.674366	0.543947
SEED;Respiration;Electron donating reactions;Respiratory_Complex_I;Respiratory_Complex_I	12	12	13	12	1	1	0.536192	0.543947
SEED;Virulence;Resistance to antibiotics and toxic compounds;Multidrug_Resistance,_Tripartite_Systems_Found_in_Gram_Negative_Bacteria;Multidrug_Resistance,_Tripartite_Systems_Found_in_Gram_Negative_Bacteria	7	6	5	5	0.565119	0.767493	0.381455	0.549684
SEED;Carbohydrates;Monosaccharides;2-Ketogluconate_Utilization;2-Ketogluconate_Utilization	6	6	5	5	0.764656	0.767493	0.544141	0.549684
SEED;Amino Acids and Derivatives;Lysine, threonine, methionine, and cysteine.1;Methionine_Salvage;Methionine_Salvage	6	6	5	5	0.764656	0.767493	0.544141	0.549684
SEED;DNA Metabolism;DNA replication;DNA-replication;DNA-replication	33	34	29	38	0.310746	0.377664	0.547049	0.553547
SEED;Protein Metabolism;Protein folding;Protein folding	22	23	21	24	0.646432	0.650973	0.458766	0.55596
SEED;Regulation and Cell signaling;Orphan_regulatory_proteins;Orphan_regulatory_proteins	23	23	22	24	0.6537	0.765473	0.377679	0.55596
SEED;Respiration;Electron donating reactions;Na(+)-translocating_NADH-quinone_oxidoreductase_and_rnf-like_group_of_electron_transport_complexes;Na(+)-translocating_NADH-quinone_oxidoreductase_and_rnf-like_group_of_electron_transport_complexes	13	13	13	13	0.844642	0.847508	0.434736	0.556449
SEED;Phages, Prophages, Transposable elements;Bacteriophage structural proteins;Bacteriophage structural proteins	4	4	2	8	0.427814	0.437234	0.5757	0.568508
SEED;Phages, Prophages, Transposable elements;Bacteriophage structural proteins;Phage_capsid_proteins;Phage_capsid_proteins	4	4	2	8	0.427814	0.437234	0.5757	0.568508
SEED;Stress Response;Heat_shock_dnaK_gene_cluster_extended;Heat_shock_dnaK_gene_cluster_extended	14	14	14	14	0.850035	0.852389	0.447261	0.568883
SEED;Nucleosides and Nucleotides;Purine_Utilization;Purine_Utilization	5	7	5	6	1	0.569462	1	0.578527
SEED;Carbohydrates;Polysaccharides;Polysaccharides	7	7	6	6	0.782356	0.784376	0.414808	0.578527
SEED;Carbohydrates;Polysaccharides;Glycogen_metabolism;Glycogen_metabolism	7	7	6	6	0.782356	0.784376	0.414808	0.578527
SEED;Carbohydrates;CO2 fixation;Photorespiration_(oxidative_C2_cycle);Photorespiration_(oxidative_C2_cycle)	8	7	7	6	0.616924	1	0.288755	0.578527
SEED;Amino Acids and Derivatives;Arginine; urea cycle, polyamines;Arginine_Biosynthesis_extended;Arginine_Biosynthesis_extended	8	7	7	6	0.616924	1	0.288755	0.578527
SEED;Carbohydrates;CO2 fixation;Calvin-Benson_cycle;Calvin-Benson_cycle	5	7	7	6	0.779934	1	1	0.578527
SEED;Amino Acids and Derivatives;Lysine, threonine, methionine, and cysteine.1;Cysteine_Biosynthesis;Cysteine_Biosynthesis	15	15	13	15	0.570265	0.576523	0.460464	0.581131
SEED;Carbohydrates;Monosaccharides;D-Galacturonate_and_D-Glucuronate_Utilization;D-Galacturonate_and_D-Glucuronate_Utilization	14	15	14	15	0.850035	0.714086	0.574406	0.581131
SEED;Metabolism of Aromatic Compounds;Metabolism of Aromatic Compounds	27	26	31	28	1	0.790627	0.33951	0.58265
SEED;Protein Metabolism;Protein processing and modification;N-linked_Glycosylation_in_Bacteria;N-linked_Glycosylation_in_Bacteria	0	2	0	1	1	0.231736	1	0.584527
SEED;Regulation and Cell signaling;Programmed Cell Death and Toxin-antitoxin Systems;MazEF_toxin-antitoxing_(programmed_cell_death)_system;MazEF_toxin-antitoxing_(programmed_cell_death)_system	0	2	0	1	1	0.231736	1	0.584527
SEED;Stress Response;Bacterial_hemoglobins;Bacterial_hemoglobins	4	2	1	1	0.192378	0.611517	0.170027	0.584527
SEED;Carbohydrates;Monosaccharides;L-rhamnose_utilization;L-rhamnose operon transcriptional activator RhaR;L-rhamnose operon transcriptional activator RhaR	2	2	1	1	0.602338	0.611517	0.577795	0.584527
SEED;Carbohydrates;Monosaccharides;Xylose_utilization;Alpha-xylosidase (EC 3.2.1.-);Alpha-xylosidase (EC 3.2.1.-)	2	2	1	1	0.602338	0.611517	0.577795	0.584527
SEED;Carbohydrates;Monosaccharides;D-gluconate_and_ketogluconates_metabolism;Glucose dehydrogenase, PQQ-dependent (EC 1.1.5.2);Glucose dehydrogenase, PQQ-dependent (EC 1.1.5.2)	2	2	1	1	0.602338	0.611517	0.577795	0.584527
SEED;Carbohydrates;Di- and oligosaccharides;Trehalose_Biosynthesis;Glycogen debranching enzyme (EC 3.2.1.-);Glycogen debranching enzyme (EC 3.2.1.-)	2	2	1	1	0.602338	0.611517	0.577795	0.584527
SEED;Carbohydrates;Di- and oligosaccharides;Beta-Glucoside_Metabolism;PTS system, cellobiose-specific IIA component (EC 2.7.1.69);PTS system, cellobiose-specific IIA component (EC 2.7.1.69)	2	2	1	1	0.602338	0.611517	0.577795	0.584527
SEED;Carbohydrates;Di- and oligosaccharides;Beta-Glucoside_Metabolism;AscBF operon repressor;AscBF operon repressor	2	2	1	1	0.602338	0.611517	0.577795	0.584527
SEED;Carbohydrates;Polysaccharides;Glycogen_metabolism;Glycogen debranching enzyme (EC 3.2.1.-);Glycogen debranching enzyme (EC 3.2.1.-)	2	2	1	1	0.602338	0.611517	0.577795	0.584527
SEED;Cofactors, Vitamins, Prosthetic Groups, Pigments;Quinone cofactors;Ubiquinone_Biosynthesis;3-polyprenyl-4-hydroxybenzoate carboxy-lyase UbiX (EC 4.1.1.-);3-polyprenyl-4-hydroxybenzoate carboxy-lyase UbiX (EC 4.1.1.-)	2	2	1	1	0.602338	0.611517	0.577795	0.584527
SEED;Virulence;Resistance to antibiotics and toxic compounds;Multidrug_Resistance,_Tripartite_Systems_Found_in_Gram_Negative_Bacteria;Inner membrane component of tripartite multidrug resistance system;Inner membrane component of tripartite multidrug resistance system	2	2	1	1	0.602338	0.611517	0.577795	0.584527
SEED;Sulfur Metabolism;Sulfur_oxidation;Sulfur_oxidation	2	2	1	1	0.602338	0.611517	0.577795	0.584527
SEED;RNA Metabolism;Transcription;Transcription_factors_bacterial;Transcription elongation factor GreA;Transcription elongation factor GreA	2	2	1	1	0.602338	0.611517	0.577795	0.584527
SEED;Amino Acids and Derivatives;Alanine, serine, and glycine;Serine_Biosynthesis;Phosphoserine phosphatase (EC 3.1.3.3);Phosphoserine phosphatase (EC 3.1.3.3)	2	2	1	1	0.602338	0.611517	0.577795	0.584527
SEED;Amino Acids and Derivatives;Aromatic amino acids and derivatives;Phenylalanine_and_Tyrosine_Branches_from_Chorismate;Phenylalanine_and_Tyrosine_Branches_from_Chorismate	2	2	1	1	0.602338	0.611517	0.577795	0.584527
SEED;Nitrogen Metabolism;Ammonia_assimilation;Glutamate synthase [NADPH] small chain (EC 1.4.1.13);Glutamate synthase [NADPH] small chain (EC 1.4.1.13)	2	2	1	1	0.602338	0.611517	0.577795	0.584527
SEED;Nucleosides and Nucleotides;Purines;Purine_conversions;Deoxyguanosinetriphosphate triphosphohydrolase (EC 3.1.5.1);Deoxyguanosinetriphosphate triphosphohydrolase (EC 3.1.5.1)	2	2	1	1	0.602338	0.611517	0.577795	0.584527
SEED;Membrane Transport;Potassium_homeostasis;Glutathione-regulated potassium-efflux system ATP-binding protein;Glutathione-regulated potassium-efflux system ATP-binding protein	2	2	1	1	0.602338	0.611517	0.577795	0.584527
SEED;Respiration;Electron donating reactions;Succinate_dehydrogenase;Succinate dehydrogenase flavoprotein subunit (EC 1.3.99.1);Succinate dehydrogenase flavoprotein subunit (EC 1.3.99.1)	2	2	1	1	0.602338	0.611517	0.577795	0.584527
SEED;Regulation and Cell signaling;DNA-binding_regulatory_proteins,_strays;LysR family transcriptional regulator YnfL;LysR family transcriptional regulator YnfL	2	2	1	1	0.602338	0.611517	0.577795	0.584527
SEED;Phosphorus Metabolism;Alkylphosphonate_utilization;Protein RcsF;Protein RcsF	2	2	1	1	0.602338	0.611517	0.577795	0.584527
SEED;Potassium metabolism;Glutathione-regulated_potassium-efflux_system_and_associated_functions;Glutathione-regulated potassium-efflux system ATP-binding protein;Glutathione-regulated potassium-efflux system ATP-binding protein	2	2	1	1	0.602338	0.611517	0.577795	0.584527
SEED;Carbohydrates;Monosaccharides;Mannose_Metabolism;Mannose-1-phosphate guanylyltransferase (GDP) (EC 2.7.7.22);Mannose-1-phosphate guanylyltransferase (GDP) (EC 2.7.7.22)	1	2	1	1	1	0.611517	1	0.584527
SEED;Carbohydrates;Monosaccharides;D-galactonate_catabolism;2-dehydro-3-deoxygalactonokinase (EC 2.7.1.58);2-dehydro-3-deoxygalactonokinase (EC 2.7.1.58)	1	2	1	1	1	0.611517	1	0.584527
SEED;Carbohydrates;Monosaccharides;D-galactonate_catabolism;2-dehydro-3-deoxyphosphogalactonate aldolase (EC 4.1.2.21);2-dehydro-3-deoxyphosphogalactonate aldolase (EC 4.1.2.21)	1	2	1	1	1	0.611517	1	0.584527
SEED;Carbohydrates;Monosaccharides;L-rhamnose_utilization;Predicted rhamnose oligosaccharide ABC transport system, substrate-binding component;Predicted rhamnose oligosaccharide ABC transport system, substrate-binding component	1	2	1	1	1	0.611517	1	0.584527
SEED;Carbohydrates;Monosaccharides;D-Galacturonate_and_D-Glucuronate_Utilization;Hexuronate utilization operon transcriptional repressor ExuR;Hexuronate utilization operon transcriptional repressor ExuR	1	2	1	1	1	0.611517	1	0.584527
SEED;Carbohydrates;Fermentation;Fermentations:_Lactate;Fermentations:_Lactate	1	2	1	1	1	0.611517	1	0.584527
SEED;Carbohydrates;Sugar alcohols;Mannitol_Utilization;Mannitol operon repressor;Mannitol operon repressor	1	2	1	1	1	0.611517	1	0.584527
SEED;Carbohydrates;Central carbohydrate metabolism;Pentose_phosphate_pathway;Transketolase, C-terminal section (EC 2.2.1.1);Transketolase, C-terminal section (EC 2.2.1.1)	1	2	1	1	1	0.611517	1	0.584527
SEED;Carbohydrates;CO2 fixation;Calvin-Benson_cycle;Fructose-1,6-bisphosphatase, GlpX type (EC 3.1.3.11);Fructose-1,6-bisphosphatase, GlpX type (EC 3.1.3.11)	1	2	1	1	1	0.611517	1	0.584527
SEED;Carbohydrates;Di- and oligosaccharides;Lactose_and_Galactose_Uptake_and_Utilization;Lactose phosphotransferase system repressor;Lactose phosphotransferase system repressor	1	2	1	1	1	0.611517	1	0.584527
SEED;Carbohydrates;Aminosugars;Chitin_and_N-acetylglucosamine_utilization;Glucosamine-6-phosphate deaminase (EC 3.5.99.6);Glucosamine-6-phosphate deaminase (EC 3.5.99.6)	1	2	1	1	1	0.611517	1	0.584527
SEED;Carbohydrates;Aminosugars;Chitin_and_N-acetylglucosamine_utilization;Beta-hexosaminidase (EC 3.2.1.52);Beta-hexosaminidase (EC 3.2.1.52)	1	2	1	1	1	0.611517	1	0.584527
SEED;Cofactors, Vitamins, Prosthetic Groups, Pigments;Folate and pterines;Molybdenum_cofactor_biosynthesis;Molybdopterin-guanine dinucleotide biosynthesis protein MobA;Molybdopterin-guanine dinucleotide biosynthesis protein MobA	1	2	1	1	1	0.611517	1	0.584527
SEED;Cofactors, Vitamins, Prosthetic Groups, Pigments;Biotin;Biotin_biosynthesis;Dethiobiotin synthetase (EC 6.3.3.3);Dethiobiotin synthetase (EC 6.3.3.3)	1	2	1	1	1	0.611517	1	0.584527
SEED;Virulence;Ton_and_Tol_transport_systems;iron-chelator utilization protein;iron-chelator utilization protein	1	2	1	1	1	0.611517	1	0.584527
SEED;Sulfur Metabolism;Thioredoxin-disulfide_reductase;Alkyl hydroperoxide reductase subunit C-like protein;Alkyl hydroperoxide reductase subunit C-like protein	1	2	1	1	1	0.611517	1	0.584527
SEED;Stress Response;Oxidative stress;Glutathione:_Redox_cycle;Glutathione peroxidase (EC 1.11.1.9);Glutathione peroxidase (EC 1.11.1.9)	1	2	1	1	1	0.611517	1	0.584527
SEED;Stress Response;Oxidative stress;Rubrerythrin;Alkyl hydroperoxide reductase subunit C-like protein;Alkyl hydroperoxide reductase subunit C-like protein	1	2	1	1	1	0.611517	1	0.584527
SEED;Stress Response;Oxidative stress;Oxidative_stress;Alkyl hydroperoxide reductase subunit C-like protein;Alkyl hydroperoxide reductase subunit C-like protein	1	2	1	1	1	0.611517	1	0.584527
SEED;Stress Response;Oxidative stress;Glutathione:_Non-redox_reactions;Uncharacterized glutathione S-transferase-like protein;Uncharacterized glutathione S-transferase-like protein	1	2	1	1	1	0.611517	1	0.584527
SEED;Protein Metabolism;Protein biosynthesis;Ribosome_SSU_bacterial;SSU ribosomal protein S2p (SAe);SSU ribosomal protein S2p (SAe)	1	2	1	1	1	0.611517	1	0.584527
SEED;Protein Metabolism;Protein biosynthesis;Universal_GTPases;GTP-binding protein EngA;GTP-binding protein EngA	1	2	1	1	1	0.611517	1	0.584527
SEED;Protein Metabolism;Protein degradation;Proteasome_bacterial;Site-specific tyrosine recombinase;Site-specific tyrosine recombinase	1	2	1	1	1	0.611517	1	0.584527
SEED;Protein Metabolism;Protein folding;Peptidyl-prolyl_cis-trans_isomerase;Peptidyl-prolyl cis-trans isomerase ppiC (EC 5.2.1.8);Peptidyl-prolyl cis-trans isomerase ppiC (EC 5.2.1.8)	1	2	1	1	1	0.611517	1	0.584527
SEED;Amino Acids and Derivatives;Branched-chain amino acids;Branched-Chain_Amino_Acid_Biosynthesis;Dihydroxy-acid dehydratase (EC 4.2.1.9);Dihydroxy-acid dehydratase (EC 4.2.1.9)	1	2	1	1	1	0.611517	1	0.584527
SEED;Amino Acids and Derivatives;Arginine; urea cycle, polyamines;Arginine_and_Ornithine_Degradation;Histidine ABC transporter, histidine-binding periplasmic protein precursor HisJ (TC 3.A.1.3.1);Histidine ABC transporter, histidine-binding periplasmic protein precursor HisJ (TC 3.A.1.3.1)	1	2	1	1	1	0.611517	1	0.584527
SEED;Amino Acids and Derivatives;Aromatic amino acids and derivatives;Chorismate_Synthesis;Quinate/shikimate dehydrogenase [Pyrroloquinoline-quinone] (EC 1.1.99.25);Quinate/shikimate dehydrogenase [Pyrroloquinoline-quinone] (EC 1.1.99.25)	1	2	1	1	1	0.611517	1	0.584527
SEED;Nucleosides and Nucleotides;Purines;Purine_conversions;Inosine-uridine preferring nucleoside hydrolase (EC 3.2.2.1);Inosine-uridine preferring nucleoside hydrolase (EC 3.2.2.1)	1	2	1	1	1	0.611517	1	0.584527
SEED;Nucleosides and Nucleotides;Pyrimidines;Pyrimidine_utilization;Possible hydrolase or acyltransferase RutD in novel pyrimidine catabolism pathway;Possible hydrolase or acyltransferase RutD in novel pyrimidine catabolism pathway	1	2	1	1	1	0.611517	1	0.584527
SEED;Cell Wall and Capsule;Capsular and extracellular polysacchrides;Capsular_heptose_biosynthesis;GDP-mannose 4,6-dehydratase (EC 4.2.1.47);GDP-mannose 4,6-dehydratase (EC 4.2.1.47)	1	2	1	1	1	0.611517	1	0.584527
SEED;Cell Wall and Capsule;Capsular and extracellular polysacchrides;Colanic_acid_biosynthesis;Colanic acid biosynthesis glycosyl transferase WcaE;Colanic acid biosynthesis glycosyl transferase WcaE	1	2	1	1	1	0.611517	1	0.584527
SEED;Cell Wall and Capsule;Capsular and extracellular polysacchrides;CMP-N-acetylneuraminate_Biosynthesis;UDP-N-acetylglucosamine 2-epimerase (EC 5.1.3.14);UDP-N-acetylglucosamine 2-epimerase (EC 5.1.3.14)	1	2	1	1	1	0.611517	1	0.584527
SEED;Metabolism of Aromatic Compounds;Metabolism of central aromatic intermediates;4-Hydroxyphenylacetic_acid_catabolic_pathway;4-hydroxyphenylacetate symporter, major facilitator superfamily (MFS);4-hydroxyphenylacetate symporter, major facilitator superfamily (MFS)	1	2	1	1	1	0.611517	1	0.584527
SEED;DNA Metabolism;DNA repair;DNA_repair,_bacterial_RecFOR_pathway;ATP-dependent DNA helicase RecQ;ATP-dependent DNA helicase RecQ	1	2	1	1	1	0.611517	1	0.584527
SEED;DNA Metabolism;DNA replication;DNA-replication;ATP-dependent DNA helicase RecQ;ATP-dependent DNA helicase RecQ	1	2	1	1	1	0.611517	1	0.584527
SEED;Phages, Prophages, Transposable elements;Staphylococcal_phi-Mu50B-like_prophages;Staphylococcal_phi-Mu50B-like_prophages	1	2	1	1	1	0.611517	1	0.584527
SEED;Respiration;Biogenesis_of_c-type_cytochromes;Cytochrome c-type biogenesis protein DsbD, protein-disulfide reductase (EC 1.8.1.8);Cytochrome c-type biogenesis protein DsbD, protein-disulfide reductase (EC 1.8.1.8)	1	2	1	1	1	0.611517	1	0.584527
SEED;Miscellaneous;Muconate_lactonizing_enzyme_family;Muconate_lactonizing_enzyme_family	1	2	1	1	1	0.611517	1	0.584527
SEED;Cell Division and Cell Cycle;Cell cycle in Prokaryota;Bacterial_Cytoskeleton;Cell division protein ZipA;Cell division protein ZipA	1	2	1	1	1	0.611517	1	0.584527
SEED;Phosphorus Metabolism;Phosphate_metabolism;Inorganic pyrophosphatase (EC 3.6.1.1);Inorganic pyrophosphatase (EC 3.6.1.1)	1	2	1	1	1	0.611517	1	0.584527
SEED;Cell Wall and Capsule;Capsular and extracellular polysacchrides;Sialic_Acid_Metabolism;N-acetylneuraminic acid outer membrane channel protein NanC;N-acetylneuraminic acid outer membrane channel protein NanC	4	2	2	1	0.427814	1	0.170027	0.584527
SEED;Sulfur Metabolism;Thioredoxin-disulfide_reductase;Hydrogen peroxide-inducible genes activator;Hydrogen peroxide-inducible genes activator	1	2	3	1	0.628087	1	1	0.584527
SEED;Stress Response;Oxidative stress;Oxidative_stress;Hydrogen peroxide-inducible genes activator;Hydrogen peroxide-inducible genes activator	1	2	3	1	0.628087	1	1	0.584527
SEED;Nucleosides and Nucleotides;Detoxification.1;Nudix_proteins_(nucleoside_triphosphate_hydrolases);Nudix hydrolase family protein YffH;Nudix hydrolase family protein YffH	1	2	3	1	0.628087	1	1	0.584527
SEED;Regulation and Cell signaling;DNA-binding_regulatory_proteins,_strays;Hydrogen peroxide-inducible genes activator;Hydrogen peroxide-inducible genes activator	1	2	3	1	0.628087	1	1	0.584527
SEED;Carbohydrates;Central carbohydrate metabolism;Pentose_phosphate_pathway;Transketolase (EC 2.2.1.1);Transketolase (EC 2.2.1.1)	2	2	2	1	1	1	0.577795	0.584527
SEED;Carbohydrates;Central carbohydrate metabolism;Glycolysis_and_Gluconeogenesis,_including_Archaeal_enzymes;Glycolysis_and_Gluconeogenesis,_including_Archaeal_enzymes	2	2	3	1	1	1	0.577795	0.584527
SEED;Carbohydrates;CO2 fixation;Carboxysome;NADH dehydrogenase (EC 1.6.99.3);NADH dehydrogenase (EC 1.6.99.3)	2	2	2	1	1	1	0.577795	0.584527
SEED;Carbohydrates;Di- and oligosaccharides;Maltose_and_Maltodextrin_Utilization;Maltose regulon regulatory protein MalI (repressor for malXY);Maltose regulon regulatory protein MalI (repressor for malXY)	2	2	2	1	1	1	0.577795	0.584527
SEED;Cofactors, Vitamins, Prosthetic Groups, Pigments;NAD and NADP;PnuC-like_transporters;PnuC-like_transporters	1	2	2	1	1	1	1	0.584527
SEED;Stress Response;Oxidative stress;Oxidative_stress;Organic hydroperoxide resistance transcriptional regulator;Organic hydroperoxide resistance transcriptional regulator	1	2	2	1	1	1	1	0.584527
SEED;Stress Response;Oxidative stress;Glutathionylspermidine_and_Trypanothione;Glutathionylspermidine_and_Trypanothione	1	2	2	1	1	1	1	0.584527
SEED;Protein Metabolism;Protein biosynthesis;Universal_GTPases;GTP-binding protein Era;GTP-binding protein Era	1	2	2	1	1	1	1	0.584527
SEED;Protein Metabolism;Protein processing and modification;Ribosomal_protein_S5p_acylation;Ribosomal_protein_S5p_acylation	2	2	2	1	1	1	0.577795	0.584527
SEED;RNA Metabolism;RNA processing and modification;Wyeosine-MimG_Biosynthesis;Thioredoxin reductase (EC 1.8.1.9);Thioredoxin reductase (EC 1.8.1.9)	1	2	2	1	1	1	1	0.584527
SEED;Motility and Chemotaxis;Bacterial_Chemotaxis;Aerotaxis sensor receptor protein;Aerotaxis sensor receptor protein	1	2	2	1	1	1	1	0.584527
SEED;Amino Acids and Derivatives;Alanine, serine, and glycine;Glycine_Biosynthesis;Glycine_Biosynthesis	2	2	2	1	1	1	0.577795	0.584527
SEED;Clustering-based subsystems;Bacterial_Cell_Division;GTP-binding protein Era;GTP-binding protein Era	1	2	2	1	1	1	1	0.584527
SEED;Nucleosides and Nucleotides;Pyrimidines;Pyrimidine_utilization;Transcriptional regulator RutR of pyrimidine catabolism (TetR family);Transcriptional regulator RutR of pyrimidine catabolism (TetR family)	2	2	2	1	1	1	0.577795	0.584527
SEED;Protein Metabolism;Protein degradation;Proteolysis_in_bacteria,_ATP-dependent;Proteolysis_in_bacteria,_ATP-dependent	16	16	13	17	0.456592	0.463373	0.485644	0.601754
SEED;Carbohydrates;Sugar alcohols;Sugar alcohols	14	16	18	17	0.859539	1	0.855946	0.601754
SEED;Cofactors, Vitamins, Prosthetic Groups, Pigments;Pyridoxine;Pyridoxine	7	8	6	7	0.782356	0.596728	0.596704	0.603965
SEED;Cofactors, Vitamins, Prosthetic Groups, Pigments;Pyridoxine;Pyridoxin_(Vitamin_B6)_Biosynthesis;Pyridoxin_(Vitamin_B6)_Biosynthesis	7	8	6	7	0.782356	0.596728	0.596704	0.603965
SEED;Nitrogen Metabolism;Nitrosative_stress;Nitrosative_stress	8	8	7	7	0.616924	0.79811	0.439058	0.603965
SEED;Respiration;Electron donating reactions;Succinate_dehydrogenase;Succinate_dehydrogenase	8	8	7	7	0.616924	0.79811	0.439058	0.603965
SEED;Protein Metabolism;Protein folding;Peptidyl-prolyl_cis-trans_isomerase;Peptidyl-prolyl_cis-trans_isomerase	7	8	7	7	1	0.79811	0.596704	0.603965
SEED;Regulation and Cell signaling;cAMP_signaling_in_bacteria;cAMP_signaling_in_bacteria	9	8	8	7	0.634844	1	0.314307	0.603965
SEED;Nucleosides and Nucleotides;De_Novo_Pyrimidine_Synthesis;De_Novo_Pyrimidine_Synthesis	8	8	8	7	0.807666	1	0.439058	0.603965
SEED;Respiration;Electron accepting reactions;Terminal_cytochrome_d_ubiquinol_oxidases;Terminal_cytochrome_d_ubiquinol_oxidases	8	8	8	7	0.807666	1	0.439058	0.603965
SEED;Sulfur Metabolism;Organic sulfur assimilation;Alkanesulfonate_assimilation;Alkanesulfonate_assimilation	7	8	8	7	1	1	0.596704	0.603965
SEED;Amino Acids and Derivatives;Arginine; urea cycle, polyamines;Urea_decomposition;Urea_decomposition	14	13	23	21	0.323377	0.181409	0.864728	0.604875
SEED;Cell Wall and Capsule;Capsular and extracellular polysacchrides;Colanic_acid_biosynthesis;Colanic_acid_biosynthesis	19	17	16	18	0.399729	0.729783	0.317765	0.610505
SEED;Virulence;Adhesion;Adhesion	1	8	7	8	0.0748923	0.79811	0.0884554	0.62362
SEED;Carbohydrates;Central carbohydrate metabolism;Pyruvate_Alanine_Serine_Interconversions;Pyruvate_Alanine_Serine_Interconversions	8	8	8	8	0.807666	1	0.615876	0.62362
SEED;Virulence;Resistance to antibiotics and toxic compounds;Copper_homeostasis:_copper_tolerance;Copper_homeostasis:_copper_tolerance	8	8	8	8	0.807666	1	0.615876	0.62362
SEED;Nucleosides and Nucleotides;Purines;De_Novo_Purine_Biosynthesis;De_Novo_Purine_Biosynthesis	8	8	8	8	0.807666	1	0.615876	0.62362
SEED;Virulence;Resistance to antibiotics and toxic compounds;Arsenic_resistance;Arsenic resistance protein ArsH;Arsenic resistance protein ArsH	0	1	0	3	1	0.481361	0.267474	0.636707
SEED;Virulence;Resistance to antibiotics and toxic compounds;Mercury_resistance_operon;Mercuric resistance operon regulatory protein;Mercuric resistance operon regulatory protein	0	1	0	3	1	0.481361	0.267474	0.636707
SEED;Virulence;Resistance to antibiotics and toxic compounds;Mercury_resistance_operon;Mercuric transport protein, MerT;Mercuric transport protein, MerT	0	1	0	3	1	0.481361	0.267474	0.636707
SEED;Virulence;Resistance to antibiotics and toxic compounds;Mercury_resistance_operon;Periplasmic mercury(+2) binding protein;Periplasmic mercury(+2) binding protein	0	1	0	3	1	0.481361	0.267474	0.636707
SEED;Virulence;Type III, Type IV, Type VI, ESAT secretion systems;Type_4_secretion_and_conjugative_transfer;IncF plasmid conjugative transfer protein TraN;IncF plasmid conjugative transfer protein TraN	0	1	0	3	1	0.481361	0.267474	0.636707
SEED;Protein Metabolism;Secretion;Protein_secretion_by_ABC-type_exporters;Protein_secretion_by_ABC-type_exporters	0	1	0	3	1	0.481361	0.267474	0.636707
SEED;Carbohydrates;Monosaccharides;L-ascorbate_utilization_(and_related_gene_clusters);L-ribulose-5-phosphate 4-epimerase (EC 5.1.3.4);L-ribulose-5-phosphate 4-epimerase (EC 5.1.3.4)	2	1	3	3	1	0.625976	1	0.636707
SEED;Virulence;Resistance to antibiotics and toxic compounds;Multidrug_Resistance_Efflux_Pumps;RND efflux system, inner membrane transporter CmeB;RND efflux system, inner membrane transporter CmeB	2	1	3	3	1	0.625976	1	0.636707
SEED;Virulence;Resistance to antibiotics and toxic compounds;Multidrug_efflux_pump_in_Campylobacter_jejuni_(CmeABC_operon);RND efflux system, inner membrane transporter CmeB;RND efflux system, inner membrane transporter CmeB	2	1	3	3	1	0.625976	1	0.636707
SEED;Amino Acids and Derivatives;Arginine; urea cycle, polyamines;Arginine_Deiminase_Pathway;Arginine_Deiminase_Pathway	3	1	3	3	1	0.625976	0.702896	0.636707
SEED;Metabolism of Aromatic Compounds;Gentisare_degradation;Gentisare_degradation	3	1	3	3	1	0.625976	0.702896	0.636707
SEED;Metabolism of Aromatic Compounds;Salicylate_and_gentisate_catabolism;Salicylate_and_gentisate_catabolism	3	1	3	3	1	0.625976	0.702896	0.636707
SEED;Motility and Chemotaxis;Flagellar motility in Prokaryota;Flagellum;Flagellar M-ring protein FliF;Flagellar M-ring protein FliF	2	1	1	3	0.602338	1	1	0.636707
SEED;Virulence;Invasion and intracellular resistance;pVir_Plasmid_of_Campylobacter;Single-stranded DNA-binding protein;Single-stranded DNA-binding protein	1	1	1	3	1	1	0.642247	0.636707
SEED;Virulence;Resistance to antibiotics and toxic compounds;Cobalt-zinc-cadmium_resistance;Cobalt-zinc-cadmium resistance protein;Cobalt-zinc-cadmium resistance protein	1	1	1	3	1	1	0.642247	0.636707
SEED;Virulence;Resistance to antibiotics and toxic compounds;Arsenic_resistance;Arsenic efflux pump protein;Arsenic efflux pump protein	1	1	1	3	1	1	0.642247	0.636707
SEED;Virulence;Resistance to antibiotics and toxic compounds;Copper_homeostasis;Copper resistance protein D;Copper resistance protein D	1	1	1	3	1	1	0.642247	0.636707
SEED;Fatty Acids, Lipids, and Isoprenoids;Fatty acids;Fatty_Acid_Biosynthesis_FASII;3-oxoacyl-[acyl-carrier-protein] synthase, KASII (EC 2.3.1.41);3-oxoacyl-[acyl-carrier-protein] synthase, KASII (EC 2.3.1.41)	1	1	1	3	1	1	0.642247	0.636707
SEED;DNA Metabolism;DNA repair;DNA_repair,_bacterial;Single-stranded DNA-binding protein;Single-stranded DNA-binding protein	1	1	1	3	1	1	0.642247	0.636707
SEED;DNA Metabolism;DNA repair;DNA_repair,_bacterial_RecFOR_pathway;Single-stranded DNA-binding protein;Single-stranded DNA-binding protein	1	1	1	3	1	1	0.642247	0.636707
SEED;DNA Metabolism;DNA replication;DNA-replication;DNA primase (EC 2.7.7.-);DNA primase (EC 2.7.7.-)	1	1	1	3	1	1	0.642247	0.636707
SEED;Cell Division and Cell Cycle;Control of Macromolecuar Synthesis;Macromolecular_synthesis_operon;DNA primase (EC 2.7.7.-);DNA primase (EC 2.7.7.-)	1	1	1	3	1	1	0.642247	0.636707
SEED;Nucleosides and Nucleotides;Ribonucleotide_reduction;Ribonucleotide_reduction	9	9	8	9	0.634844	0.809569	0.634361	0.639173
SEED;Carbohydrates;Monosaccharides;L-Arabinose_utilization;L-Arabinose_utilization	9	9	9	9	0.816831	1	0.634361	0.639173
SEED;Cell Division and Cell Cycle;Cell Division and Cell Cycle	37	36	35	41	0.477357	0.721062	0.420863	0.645006
SEED;Membrane Transport;Transport_of_Zinc;Transport_of_Zinc	7	10	10	10	0.808868	1	1	0.654014
SEED;Respiration;ATP synthases;ATP synthases	9	10	11	10	1	1	0.65114	0.654014
SEED;Respiration;ATP synthases;F0F1-type_ATP_synthase;F0F1-type_ATP_synthase	9	10	11	10	1	1	0.65114	0.654014
SEED;Cofactors, Vitamins, Prosthetic Groups, Pigments;Tetrapyrroles;Coenzyme_B12_biosynthesis;Vitamin B12 ABC transporter, ATPase component BtuD;Vitamin B12 ABC transporter, ATPase component BtuD	3	3	1	2	0.34585	0.357394	0.656312	0.659191
SEED;Secondary Metabolism;Bacterial cytostatics, differentiation factors and antibiotics;Phenazine_biosynthesis;Phenazine_biosynthesis	3	3	1	2	0.34585	0.357394	0.656312	0.659191
SEED;Secondary Metabolism;Bacterial cytostatics, differentiation factors and antibiotics;Phenazine_biosynthesis;Phenazine biosynthesis protein PhzF;Phenazine biosynthesis protein PhzF	3	3	1	2	0.34585	0.357394	0.656312	0.659191
SEED;Amino Acids and Derivatives;Aromatic amino acids and derivatives;Chorismate:_Intermediate_for_synthesis_of_PAPA_antibiotics,_PABA,_anthranilate,_3-hydroxyanthranilate_and_more.;Chorismate:_Intermediate_for_synthesis_of_PAPA_antibiotics,_PABA,_anthranilate,_3-hydroxyanthranilate_and_more.	3	3	1	2	0.34585	0.357394	0.656312	0.659191
SEED;Respiration;Electron accepting reactions;Anaerobic_respiratory_reductases;Anaerobic dimethyl sulfoxide reductase chain A (EC 1.8.99.-);Anaerobic dimethyl sulfoxide reductase chain A (EC 1.8.99.-)	3	3	1	2	0.34585	0.357394	0.656312	0.659191
SEED;Virulence;Iron Scavenging Mechanisms;Iron_acquisition_in_Vibrio;Ferrichrome-iron receptor;Ferrichrome-iron receptor	3	3	2	2	0.669966	0.676678	0.656312	0.659191
SEED;Virulence;Iron Scavenging Mechanisms;Transport_of_Iron;Ferrichrome-iron receptor;Ferrichrome-iron receptor	3	3	2	2	0.669966	0.676678	0.656312	0.659191
SEED;Respiration;Soluble_cytochromes_and_functionally_related_electron_carriers;Ferredoxin;Ferredoxin	3	3	2	2	0.669966	0.676678	0.656312	0.659191
SEED;Carbohydrates;Fermentation;Fermentations:_Mixed_acid;Pyruvate formate-lyase activating enzyme (EC 1.97.1.4);Pyruvate formate-lyase activating enzyme (EC 1.97.1.4)	2	3	2	2	1	0.676678	1	0.659191
SEED;Carbohydrates;Di- and oligosaccharides;Maltose_and_Maltodextrin_Utilization;Maltose/maltodextrin transport ATP-binding protein MalK (EC 3.6.3.19);Maltose/maltodextrin transport ATP-binding protein MalK (EC 3.6.3.19)	2	3	2	2	1	0.676678	1	0.659191
SEED;Virulence;Ton_and_Tol_transport_systems;4-hydroxybenzoyl-CoA thioesterase family active site;4-hydroxybenzoyl-CoA thioesterase family active site	2	3	2	2	1	0.676678	1	0.659191
SEED;Fatty Acids, Lipids, and Isoprenoids;Phospholipids;Glycerolipid_and_Glycerophospholipid_Metabolism_in_Bacteria;Cardiolipin synthetase (EC 2.7.8.-);Cardiolipin synthetase (EC 2.7.8.-)	2	3	2	2	1	0.676678	1	0.659191
SEED;Membrane Transport;ABC transporters;ABC_transporter_branched-chain_amino_acid_(TC_3.A.1.4.1);High-affinity branched-chain amino acid transport system permease protein LivH (TC 3.A.1.4.1);High-affinity branched-chain amino acid transport system permease protein LivH (TC 3.A.1.4.1)	2	3	2	2	1	0.676678	1	0.659191
SEED;Potassium metabolism;Glutathione-regulated_potassium-efflux_system_and_associated_functions;Potassium efflux system KefA protein / Small-conductance mechanosensitive channel;Potassium efflux system KefA protein / Small-conductance mechanosensitive channel	2	3	2	2	1	0.676678	1	0.659191
SEED;Protein Metabolism;Selenoproteins;Glycine_reductase,_sarcosine_reductase_and_betaine_reductase;Glycine_reductase,_sarcosine_reductase_and_betaine_reductase	2	3	4	2	0.69135	1	1	0.659191
SEED;Protein Metabolism;Selenoproteins;Glycine_reductase,_sarcosine_reductase_and_betaine_reductase;Thioredoxin;Thioredoxin	2	3	4	2	0.69135	1	1	0.659191
SEED;Carbohydrates;Central carbohydrate metabolism;Pyruvate_metabolism_II:_acetyl-CoA,_acetogenesis_from_pyruvate;Aldehyde dehydrogenase (EC 1.2.1.3);Aldehyde dehydrogenase (EC 1.2.1.3)	2	3	3	2	1	1	1	0.659191
SEED;Amino Acids and Derivatives;Arginine; urea cycle, polyamines;Arginine_and_Ornithine_Degradation;Arginine_and_Ornithine_Degradation	25	22	23	25	0.472129	1	0.31567	0.662176
SEED;Amino Acids and Derivatives;Alanine, serine, and glycine;Alanine, serine, and glycine	25	23	28	26	1	0.676503	0.394277	0.667156
SEED;Carbohydrates;Di- and oligosaccharides;Trehalose_Uptake_and_Utilization;Trehalose_Uptake_and_Utilization	10	11	11	11	1	1	0.662623	0.668062
SEED;Carbohydrates;Di- and oligosaccharides;Lactose_and_Galactose_Uptake_and_Utilization;Lactose_and_Galactose_Uptake_and_Utilization	8	11	10	12	1	0.827752	1	0.681262
SEED;Clustering-based subsystems;Conserved_gene_cluster_associated_with_Met-tRNA_formyltransferase;Conserved_gene_cluster_associated_with_Met-tRNA_formyltransferase	12	12	11	13	0.677899	0.835139	0.686089	0.690492
SEED;Cell Division and Cell Cycle;Cell cycle in Prokaryota;Cell cycle in Prokaryota	30	29	28	33	0.509718	0.692196	0.443418	0.700398
SEED;Virulence;Invasion and intracellular resistance;Invasion and intracellular resistance	2	2	2	4	1	1	1	0.702015
SEED;Virulence;Invasion and intracellular resistance;pVir_Plasmid_of_Campylobacter;pVir_Plasmid_of_Campylobacter	2	2	2	4	1	1	1	0.702015
SEED;Amino Acids and Derivatives;Lysine, threonine, methionine, and cysteine.1;Methionine_Degradation;Methionine ABC transporter ATP-binding protein;Methionine ABC transporter ATP-binding protein	3	2	3	4	1	1	1	0.702015
SEED;Amino Acids and Derivatives;Lysine, threonine, methionine, and cysteine.1;Methionine_Biosynthesis;Methionine ABC transporter ATP-binding protein;Methionine ABC transporter ATP-binding protein	3	2	3	4	1	1	1	0.702015
SEED;DNA Metabolism;DNA repair;DNA_repair,_bacterial_MutL-MutS_system;DNA_repair,_bacterial_MutL-MutS_system	2	2	2	4	1	1	1	0.702015
SEED;Regulation and Cell signaling;Sex_pheromones_in_Enterococcus_faecalis_and_other_Firmicutes;Sex_pheromones_in_Enterococcus_faecalis_and_other_Firmicutes	3	2	3	4	1	1	1	0.702015
SEED;Sulfur Metabolism;Organic sulfur assimilation;Utilization_of_glutathione_as_a_sulphur_source;Utilization_of_glutathione_as_a_sulphur_source	3	4	3	3	1	0.717454	0.702896	0.706457
SEED;Respiration;Electron donating reactions;Respiratory_dehydrogenases_1;Respiratory_dehydrogenases_1	3	4	3	3	1	0.717454	0.702896	0.706457
SEED;Carbohydrates;CO2 fixation;Carboxysome;Carboxysome	5	4	5	3	1	1	0.296152	0.706457
SEED;RNA Metabolism;RNA processing and modification;Wyeosine-MimG_Biosynthesis;Wyeosine-MimG_Biosynthesis	3	4	4	3	1	1	0.702896	0.706457
SEED;Phosphorus Metabolism;Alkylphosphonate_utilization;Alkylphosphonate_utilization	15	14	15	15	0.719069	1	0.460464	0.70869
SEED;Secondary Metabolism;Bacterial cytostatics, differentiation factors and antibiotics;Bacterial cytostatics, differentiation factors and antibiotics	5	4	2	4	0.263479	0.437234	0.507644	0.73568
SEED;Virulence;Iron Scavenging Mechanisms;Siderophore_Aerobactin;Siderophore_Aerobactin	4	4	2	4	0.427814	0.437234	0.72913	0.73568
SEED;Fatty Acids, Lipids, and Isoprenoids;Fatty acids;Fatty_Acid_Biosynthesis_FASII;Acyl carrier protein;Acyl carrier protein	2	4	3	4	1	0.717454	1	0.73568
SEED;Fatty Acids, Lipids, and Isoprenoids;Phospholipids;Glycerolipid_and_Glycerophospholipid_Metabolism_in_Bacteria;Acyl carrier protein;Acyl carrier protein	2	4	3	4	1	0.717454	1	0.73568
SEED;Cell Wall and Capsule;Cell wall of Mycobacteria;mycolic_acid_synthesis;Acyl carrier protein;Acyl carrier protein	2	4	3	4	1	0.717454	1	0.73568
SEED;Cofactors, Vitamins, Prosthetic Groups, Pigments;Folate and pterines;p-Aminobenzoyl-Glutamate_Utilization;p-Aminobenzoyl-Glutamate_Utilization	0	4	4	4	0.128117	1	0.142561	0.73568
SEED;Clustering-based subsystems;NusA-TFII_Cluster;NusA-TFII_Cluster	5	4	4	4	0.742212	1	0.507644	0.73568
SEED;Carbohydrates;Central carbohydrate metabolism;Pyruvate_Alanine_Serine_Interconversions;Serine transporter;Serine transporter	4	4	4	4	1	1	0.72913	0.73568
SEED;Cofactors, Vitamins, Prosthetic Groups, Pigments;Riboflavin, FMN, FAD;Riboflavin,_FMN_and_FAD_metabolism;Riboflavin,_FMN_and_FAD_metabolism	4	4	5	4	1	1	0.72913	0.73568
SEED;Virulence;Resistance to antibiotics and toxic compounds;Resistance_to_fluoroquinolones;Resistance_to_fluoroquinolones	4	4	4	4	1	1	0.72913	0.73568
SEED;Stress Response;Oxidative stress;Glutathione:_Biosynthesis_and_gamma-glutamyl_cycle;Glutathione:_Biosynthesis_and_gamma-glutamyl_cycle	4	4	4	4	1	1	0.72913	0.73568
SEED;Stress Response;Detoxification;Detoxification	4	4	4	4	1	1	0.72913	0.73568
SEED;RNA Metabolism;Transcription;RNA_polymerase_bacterial;RNA_polymerase_bacterial	4	4	4	4	1	1	0.72913	0.73568
SEED;Amino Acids and Derivatives;Lysine, threonine, methionine, and cysteine.1;Threonine_degradation;Threonine_degradation	4	4	4	4	1	1	0.72913	0.73568
SEED;Amino Acids and Derivatives;Lysine, threonine, methionine, and cysteine.1;Lysine_degradation;Lysine_degradation	3	4	4	4	1	1	1	0.73568
SEED;Amino Acids and Derivatives;Lysine, threonine, methionine, and cysteine.1;Threonine_anaerobic_catabolism_gene_cluster;Serine transporter;Serine transporter	4	4	4	4	1	1	0.72913	0.73568
SEED;Amino Acids and Derivatives;Alanine, serine, and glycine;Glycine_and_Serine_Utilization;Serine transporter;Serine transporter	4	4	4	4	1	1	0.72913	0.73568
SEED;Amino Acids and Derivatives;Alanine, serine, and glycine;Alanine_biosynthesis;Alanine_biosynthesis	4	4	5	4	1	1	0.72913	0.73568
SEED;DNA Metabolism;DNA repair;2-phosphoglycolate_salvage;2-phosphoglycolate_salvage	4	4	4	4	1	1	0.72913	0.73568
SEED;DNA Metabolism;DNA repair;DNA_repair,_UvrABC_system;DNA_repair,_UvrABC_system	4	4	4	4	1	1	0.72913	0.73568
SEED;Respiration;Electron accepting reactions;Terminal_cytochrome_O_ubiquinol_oxidase;Terminal_cytochrome_O_ubiquinol_oxidase	4	4	4	4	1	1	0.72913	0.73568
SEED;Respiration;Electron donating reactions;Electron donating reactions	43	37	45	44	0.747686	0.657292	0.192243	0.7369
SEED;Amino Acids and Derivatives;Lysine, threonine, methionine, and cysteine.1;Methionine_Biosynthesis;Methionine_Biosynthesis	19	17	20	19	0.87277	0.869664	0.411241	0.737386
SEED;Membrane Transport;Potassium_homeostasis;Potassium_homeostasis	20	17	19	19	0.630832	1	0.261465	0.737386
SEED;Motility and Chemotaxis;Flagellar motility in Prokaryota;Flagellum_in_Campylobacter;Flagellum_in_Campylobacter	7	3	3	6	0.205094	1	0.414808	0.739956
SEED;Carbohydrates;Di- and oligosaccharides;Lactose_utilization;Lactose_utilization	1	3	3	6	0.628087	1	0.250622	0.739956
SEED;Carbohydrates;Organic acids;Lactate_utilization;Lactate_utilization	5	5	4	5	0.742212	0.746033	0.751943	0.75608
SEED;Metabolism of Aromatic Compounds;Aromatic_Amin_Catabolism;Aromatic_Amin_Catabolism	5	5	4	5	0.742212	0.746033	0.751943	0.75608
SEED;Cofactors, Vitamins, Prosthetic Groups, Pigments;Lipoic acid;Lipoic acid	5	5	5	5	1	1	0.751943	0.75608
SEED;Cofactors, Vitamins, Prosthetic Groups, Pigments;Lipoic acid;Lipoic_acid_metabolism;Lipoic_acid_metabolism	5	5	5	5	1	1	0.751943	0.75608
SEED;Protein Metabolism;Secretion;Twin-arginine_translocation_system;Twin-arginine_translocation_system	5	5	5	5	1	1	0.751943	0.75608
SEED;RNA Metabolism;RNA processing and modification;ATP-dependent_RNA_helicases,_bacterial;ATP-dependent_RNA_helicases,_bacterial	5	5	6	5	1	1	0.751943	0.75608
SEED;Clustering-based subsystems;Lysine, threonine, methionine, and cysteine;Lysine, threonine, methionine, and cysteine	5	5	5	5	1	1	0.751943	0.75608
SEED;Clustering-based subsystems;Lysine, threonine, methionine, and cysteine;YeiH;YeiH	5	5	5	5	1	1	0.751943	0.75608
SEED;Clustering-based subsystems;CBSS-562.2.peg.5158_SK3_including;CBSS-562.2.peg.5158_SK3_including	5	5	5	5	1	1	0.751943	0.75608
SEED;Clustering-based subsystems;CBSS-214092.1.peg.3450;CBSS-214092.1.peg.3450	5	5	6	5	1	1	0.751943	0.75608
SEED;Phosphorus Metabolism;High_affinity_phosphate_transporter_and_control_of_PHO_regulon;High_affinity_phosphate_transporter_and_control_of_PHO_regulon	5	5	5	5	1	1	0.751943	0.75608
SEED;Cell Division and Cell Cycle;Cell cycle in Prokaryota;Bacterial_Cytoskeleton;Bacterial_Cytoskeleton	20	21	19	24	0.630832	0.635816	0.7602	0.763771
SEED;Amino Acids and Derivatives;Histidine Metabolism;Histidine_Biosynthesis;Histidine_Biosynthesis	6	6	5	6	0.764656	0.767493	0.771534	0.773618
SEED;Amino Acids and Derivatives;Branched-chain amino acids;Branched-Chain_Amino_Acid_Biosynthesis;Branched-Chain_Amino_Acid_Biosynthesis	4	6	5	6	1	0.767493	1	0.773618
SEED;Virulence;Pathogenicity islands;Pathogenicity islands	6	6	8	6	0.796493	0.792427	0.771534	0.773618
SEED;Virulence;Pathogenicity islands;Staphylococcal_pathogenicity_islands_SaPI;Staphylococcal_pathogenicity_islands_SaPI	6	6	8	6	0.796493	0.792427	0.771534	0.773618
SEED;Clustering-based subsystems;Putative_hemin_transporter;Putative_hemin_transporter	8	6	6	6	0.593681	1	0.288755	0.773618
SEED;Amino Acids and Derivatives;Histidine Metabolism;Histidine_Degradation;Histidine_Degradation	6	6	6	6	1	1	0.771534	0.773618
SEED;DNA Metabolism;DNA repair;DNA_Repair_Base_Excision;DNA_Repair_Base_Excision	6	6	6	6	1	1	0.771534	0.773618
SEED;Carbohydrates;Monosaccharides;Hexose_Phosphate_Uptake_System;Hexose_Phosphate_Uptake_System	5	7	4	7	0.742212	0.372908	1	0.788766
SEED;Virulence;Adhesion;Curli_production;Curli_production	0	7	6	7	0.0332174	0.784376	0.0236009	0.788766
SEED;Carbohydrates;Sugar alcohols;Glycerol_and_Glycerol-3-phosphate_Uptake_and_Utilization;Glycerol_and_Glycerol-3-phosphate_Uptake_and_Utilization	8	7	7	7	0.616924	1	0.439058	0.788766
SEED;Virulence;Quorum sensing and biofilm formation;Autoinducer_2_(AI-2)_transport_and_processing_(lsrACDBFGE_operon);Autoinducer_2_(AI-2)_transport_and_processing_(lsrACDBFGE_operon)	8	7	7	7	0.616924	1	0.439058	0.788766
SEED;Cofactors, Vitamins, Prosthetic Groups, Pigments;NAD and NADP;NAD_and_NADP_cofactor_biosynthesis_global;NAD_and_NADP_cofactor_biosynthesis_global	8	7	8	7	0.807666	1	0.439058	0.788766
SEED;Carbohydrates;Monosaccharides;Deoxyribose_and_Deoxynucleoside_Catabolism;Deoxyribose_and_Deoxynucleoside_Catabolism	7	7	8	7	1	1	0.596704	0.788766
SEED;Cofactors, Vitamins, Prosthetic Groups, Pigments;Quinone cofactors;Menaquinone_and_Phylloquinone_Biosynthesis;Menaquinone_and_Phylloquinone_Biosynthesis	7	7	7	7	1	1	0.596704	0.788766
SEED;Carbohydrates;Di- and oligosaccharides;Maltose_and_Maltodextrin_Utilization;Maltose_and_Maltodextrin_Utilization	30	26	33	31	0.899879	0.601682	0.300078	0.79009
SEED;Regulation and Cell signaling;Two-component_regulatory_systems_in_Campylobacter;Two-component_regulatory_systems_in_Campylobacter	8	7	5	8	0.405453	0.569462	0.615876	0.801867
SEED;Stress Response;Oxidative stress;Glutathione:_Redox_cycle;Glutathione:_Redox_cycle	5	7	6	8	1	0.784376	1	0.801867
SEED;DNA Metabolism;DNA repair;DNA_repair,_bacterial_RecFOR_pathway;DNA_repair,_bacterial_RecFOR_pathway	6	7	6	8	1	0.784376	1	0.801867
SEED;RNA Metabolism;RNA processing and modification;RNA_processing_and_degradation,_bacterial;RNA_processing_and_degradation,_bacterial	8	7	8	8	0.807666	1	0.615876	0.801867
SEED;Phages, Prophages, Transposable elements;Phages, Prophages, Transposable elements	8	6	3	10	0.128286	0.328055	1	0.801972
SEED;Stress Response;Universal_stress_protein_family;Universal_stress_protein_family	7	6	7	10	1	1	1	0.801972
SEED;Protein Metabolism;Protein folding;Protein_chaperones;Protein_chaperones	9	8	7	9	0.464508	0.79811	0.634361	0.810543
SEED;Regulation and Cell signaling;Programmed Cell Death and Toxin-antitoxin Systems;Murein_hydrolase_regulation_and_cell_death;Murein_hydrolase_regulation_and_cell_death	8	8	7	9	0.616924	0.79811	0.807186	0.810543
SEED;Cofactors, Vitamins, Prosthetic Groups, Pigments;Riboflavin, FMN, FAD;Riboflavin, FMN, FAD	8	8	10	9	1	0.816688	0.807186	0.810543
SEED;Virulence;Quorum sensing and biofilm formation;Quorum sensing and biofilm formation	9	8	8	9	0.634844	1	0.634361	0.810543
SEED;DNA Metabolism;DNA_structural_proteins,_bacterial;DNA_structural_proteins,_bacterial	8	8	9	9	1	1	0.807186	0.810543
SEED;Carbohydrates;Central carbohydrate metabolism;Entner-Doudoroff_Pathway;Entner-Doudoroff_Pathway	7	7	9	11	1	0.805653	0.816205	0.813615
SEED;Carbohydrates;Central carbohydrate metabolism;Pyruvate_metabolism_I:_anaplerotic_reactions,_PEP;Pyruvate_metabolism_I:_anaplerotic_reactions,_PEP	9	9	9	10	0.816831	1	0.65114	0.818807
SEED;Secondary Metabolism;Secondary Metabolism	12	10	8	11	0.267017	0.638902	0.400063	0.826597
SEED;DNA Metabolism;DNA replication;DNA replication	38	40	34	49	0.343276	0.350398	0.827958	0.830662
SEED;RNA Metabolism;RNA processing and modification;tRNA_processing;tRNA_processing	11	11	12	13	1	1	0.836797	0.839757
SEED;Amino Acids and Derivatives;Arginine; urea cycle, polyamines;Polyamine_Metabolism;Polyamine_Metabolism	15	10	17	15	1	0.335037	0.460464	0.840758
SEED;Carbohydrates;Monosaccharides;D-ribose_utilization;D-ribose_utilization	10	12	14	14	0.68535	1	1	0.844656
SEED;Amino Acids and Derivatives;Arginine; urea cycle, polyamines;Arginine; urea cycle, polyamines	59	52	68	64	1	0.3126	0.232738	0.850826
SEED;Regulation and Cell signaling;DNA-binding_regulatory_proteins,_strays;DNA-binding_regulatory_proteins,_strays	15	14	20	16	0.73524	0.492829	0.585796	0.854179
SEED;Amino Acids and Derivatives;Branched-chain amino acids;Branched-chain amino acids	15	14	14	17	0.710034	0.852389	0.597192	0.858664
SEED;Carbohydrates;Aminosugars;Aminosugars	19	15	20	18	0.87277	0.612437	0.317765	0.861923
SEED;Carbohydrates;Monosaccharides;D-allose_utilization;D-allose_utilization	0	0	7	0	0.0170103	0.0160665	1	1
SEED;Carbohydrates;Monosaccharides;D-Tagatose_and_Galactitol_Utilization;D-Tagatose_and_Galactitol_Utilization	1	1	5	1	0.224581	0.220603	1	1
SEED;Virulence;Ton_and_Tol_transport_systems;TolA protein;TolA protein	1	2	0	2	0.467612	0.231736	1	1
SEED;DNA Metabolism;Restriction-Modification_System;Restriction-Modification_System	3	0	3	0	1	0.250983	0.0760998	1
SEED;Membrane Transport;Sugar Phosphotransferase Systems, PTS;Sugar Phosphotransferase Systems, PTS	2	2	5	2	0.459885	0.455271	1	1
SEED;Membrane Transport;Sugar Phosphotransferase Systems, PTS;Fructose_and_Mannose_Inducible_PTS;Fructose_and_Mannose_Inducible_PTS	2	2	5	2	0.459885	0.455271	1	1
SEED;Clustering-based subsystems;Putative_hemin_transporter;Putative Heme-regulated two-component response regulator;Putative Heme-regulated two-component response regulator	3	1	0	1	0.102289	0.481361	0.317816	1
SEED;Regulation and Cell signaling;cAMP_signaling_in_bacteria;Putative Heme-regulated two-component response regulator;Putative Heme-regulated two-component response regulator	3	1	0	1	0.102289	0.481361	0.317816	1
SEED;Carbohydrates;Monosaccharides;L-rhamnose_utilization;Lactaldehyde dehydrogenase involved in fucose or rhamnose utilization (EC 1.2.1.22);Lactaldehyde dehydrogenase involved in fucose or rhamnose utilization (EC 1.2.1.22)	1	1	0	1	0.467612	0.481361	1	1
SEED;Carbohydrates;Fermentation;Acetyl-CoA_fermentation_to_Butyrate;Acetyl-CoA_fermentation_to_Butyrate	1	1	0	1	0.467612	0.481361	1	1
SEED;Carbohydrates;Fermentation;Acetyl-CoA_fermentation_to_Butyrate;Ferredoxin-like protein;Ferredoxin-like protein	1	1	0	1	0.467612	0.481361	1	1
SEED;Carbohydrates;Organic acids;Lactate_utilization;D-Lactate dehydrogenase (EC 1.1.2.5);D-Lactate dehydrogenase (EC 1.1.2.5)	1	1	0	1	0.467612	0.481361	1	1
SEED;Carbohydrates;Central carbohydrate metabolism;Pyruvate_metabolism_I:_anaplerotic_reactions,_PEP;Phosphoenolpyruvate synthase (EC 2.7.9.2);Phosphoenolpyruvate synthase (EC 2.7.9.2)	1	1	0	1	0.467612	0.481361	1	1
SEED;Carbohydrates;Di- and oligosaccharides;Trehalose_Uptake_and_Utilization;Trehalase (EC 3.2.1.28);Trehalase (EC 3.2.1.28)	1	1	0	1	0.467612	0.481361	1	1
SEED;Carbohydrates;Aminosugars;Chitin_and_N-acetylglucosamine_utilization;Chitin binding protein;Chitin binding protein	1	1	0	1	0.467612	0.481361	1	1
SEED;Cofactors, Vitamins, Prosthetic Groups, Pigments;Tetrapyrroles;Experimental_tye;Coproporphyrinogen III oxidase, oxygen-independent (EC 1.3.99.22);Coproporphyrinogen III oxidase, oxygen-independent (EC 1.3.99.22)	1	1	0	1	0.467612	0.481361	1	1
SEED;Cofactors, Vitamins, Prosthetic Groups, Pigments;NAD and NADP;NAD_regulation;Quinolinate synthetase (EC 4.1.99.-);Quinolinate synthetase (EC 4.1.99.-)	1	1	0	1	0.467612	0.481361	1	1
SEED;Cofactors, Vitamins, Prosthetic Groups, Pigments;NAD and NADP;NAD_and_NADP_cofactor_biosynthesis_global;Quinolinate synthetase (EC 4.1.99.-);Quinolinate synthetase (EC 4.1.99.-)	1	1	0	1	0.467612	0.481361	1	1
SEED;Virulence;Resistance to antibiotics and toxic compounds;Arsenic_resistance;Arsenical resistance operon repressor;Arsenical resistance operon repressor	1	1	0	2	0.467612	0.481361	1	1
SEED;Virulence;Iron Scavenging Mechanisms;Iron_acquisition_in_Vibrio;Ferric hydroxamate ABC transporter (TC 3.A.1.14.3), periplasmic substrate binding protein FhuD;Ferric hydroxamate ABC transporter (TC 3.A.1.14.3), periplasmic substrate binding protein FhuD	1	1	0	1	0.467612	0.481361	1	1
SEED;Virulence;Iron Scavenging Mechanisms;Siderophore_Aerobactin;Ferric hydroxamate ABC transporter (TC 3.A.1.14.3), periplasmic substrate binding protein FhuD;Ferric hydroxamate ABC transporter (TC 3.A.1.14.3), periplasmic substrate binding protein FhuD	1	1	0	1	0.467612	0.481361	1	1
SEED;Stress Response;Oxidative stress;Glutathione:_Non-redox_reactions;Probable glutathione S-transferase (EC 2.5.1.18), YfcF homolog;Probable glutathione S-transferase (EC 2.5.1.18), YfcF homolog	1	1	0	1	0.467612	0.481361	1	1
SEED;Stress Response;Hfl_operon;RNA-binding protein Hfq;RNA-binding protein Hfq	1	1	0	1	0.467612	0.481361	1	1
SEED;Protein Metabolism;Protein biosynthesis;Translation_initiation_factors_eukaryotic_and_archaeal;Translation initiation factor SUI1;Translation initiation factor SUI1	1	1	0	1	0.467612	0.481361	1	1
SEED;RNA Metabolism;RNA processing and modification;Polyadenylation_bacterial;RNA-binding protein Hfq;RNA-binding protein Hfq	1	1	0	1	0.467612	0.481361	1	1
SEED;Secondary Metabolism;Bacterial cytostatics, differentiation factors and antibiotics;2-isocapryloyl-3R-hydroxymethyl-gamma-butyrolactone_and_other_bacterial_morphogens;2-isocapryloyl-3R-hydroxymethyl-gamma-butyrolactone_and_other_bacterial_morphogens	1	1	0	1	0.467612	0.481361	1	1
SEED;Secondary Metabolism;Bacterial cytostatics, differentiation factors and antibiotics;2-isocapryloyl-3R-hydroxymethyl-gamma-butyrolactone_and_other_bacterial_morphogens;5-Methyltetrahydrofolate--homocysteine methyltransferase;5-Methyltetrahydrofolate--homocysteine methyltransferase	1	1	0	1	0.467612	0.481361	1	1
SEED;Secondary Metabolism;Biologically active compounds in metazoan cell defence and differentiation;Biologically active compounds in metazoan cell defence and differentiation	1	1	0	1	0.467612	0.481361	1	1
SEED;Secondary Metabolism;Biologically active compounds in metazoan cell defence and differentiation;Quinolinic_acid_and_its_derivatives;Quinolinic_acid_and_its_derivatives	1	1	0	1	0.467612	0.481361	1	1
SEED;Secondary Metabolism;Biologically active compounds in metazoan cell defence and differentiation;Quinolinic_acid_and_its_derivatives;Quinolinate synthetase (EC 4.1.99.-);Quinolinate synthetase (EC 4.1.99.-)	1	1	0	1	0.467612	0.481361	1	1
SEED;Amino Acids and Derivatives;Branched-chain amino acids;Branched-Chain_Amino_Acid_Biosynthesis;Valine--pyruvate aminotransferase (EC 2.6.1.66);Valine--pyruvate aminotransferase (EC 2.6.1.66)	1	1	0	1	0.467612	0.481361	1	1
SEED;Amino Acids and Derivatives;Lysine, threonine, methionine, and cysteine.1;Lysine_Biosynthesis_DAP_Pathway;Diaminopimelate epimerase (EC 5.1.1.7);Diaminopimelate epimerase (EC 5.1.1.7)	1	1	0	1	0.467612	0.481361	1	1
SEED;Amino Acids and Derivatives;Aromatic amino acids and derivatives;Chorismate:_Intermediate_for_synthesis_of_PAPA_antibiotics,_PABA,_anthranilate,_3-hydroxyanthranilate_and_more.;Isochorismatase (EC 3.3.2.1);Isochorismatase (EC 3.3.2.1)	1	1	0	1	0.467612	0.481361	1	1
SEED;Amino Acids and Derivatives;Histidine Metabolism;Histidine_Biosynthesis;Phosphoribosylformimino-5-aminoimidazole carboxamide ribotide isomerase (EC 5.3.1.16);Phosphoribosylformimino-5-aminoimidazole carboxamide ribotide isomerase (EC 5.3.1.16)	1	1	0	1	0.467612	0.481361	1	1
SEED;Clustering-based subsystems;Conserved_gene_cluster_associated_with_Met-tRNA_formyltransferase;Helicase PriA essential for oriC/DnaA-independent DNA replication;Helicase PriA essential for oriC/DnaA-independent DNA replication	1	1	0	1	0.467612	0.481361	1	1
SEED;Fatty Acids, Lipids, and Isoprenoids;Phospholipids;Glycerolipid_and_Glycerophospholipid_Metabolism_in_Bacteria;Aldehyde dehydrogenase B (EC 1.2.1.22);Aldehyde dehydrogenase B (EC 1.2.1.22)	1	1	0	1	0.467612	0.481361	1	1
SEED;Nucleosides and Nucleotides;De_Novo_Pyrimidine_Synthesis;Uracil phosphoribosyltransferase (EC 2.4.2.9);Uracil phosphoribosyltransferase (EC 2.4.2.9)	1	1	0	1	0.467612	0.481361	1	1
SEED;Nucleosides and Nucleotides;Ribonucleotide_reduction;Ribonucleotide reductase of class Ib (aerobic), alpha subunit (EC 1.17.4.1);Ribonucleotide reductase of class Ib (aerobic), alpha subunit (EC 1.17.4.1)	1	1	0	1	0.467612	0.481361	1	1
SEED;Cell Wall and Capsule;Capsular and extracellular polysacchrides;Sialic_Acid_Metabolism;N-acetylmannosamine kinase (EC 2.7.1.60);N-acetylmannosamine kinase (EC 2.7.1.60)	1	1	0	1	0.467612	0.481361	1	1
SEED;Cell Wall and Capsule;Gram-Negative cell wall components;Lipid_A_modifications;Transcriptional regulatory protein PhoP;Transcriptional regulatory protein PhoP	1	1	0	2	0.467612	0.481361	1	1
SEED;Cell Wall and Capsule;Gram-Negative cell wall components;LOS_core_oligosaccharide_biosynthesis;UDP-glucose:(heptosyl) LPS alpha1,3-glucosyltransferase WaaG (EC 2.4.1.-);UDP-glucose:(heptosyl) LPS alpha1,3-glucosyltransferase WaaG (EC 2.4.1.-)	1	1	0	1	0.467612	0.481361	1	1
SEED;Metabolism of Aromatic Compounds;Aromatic_Amin_Catabolism;Aldehyde dehydrogenase (EC 1.2.1.3), PaaZ;Aldehyde dehydrogenase (EC 1.2.1.3), PaaZ	1	1	0	1	0.467612	0.481361	1	1
SEED;DNA Metabolism;DNA replication;DNA-replication;DNA polymerase III theta subunit (EC 2.7.7.7);DNA polymerase III theta subunit (EC 2.7.7.7)	1	1	0	2	0.467612	0.481361	1	1
SEED;DNA Metabolism;DNA replication;DNA-replication;Primosomal replication protein N;Primosomal replication protein N	1	1	0	1	0.467612	0.481361	1	1
SEED;DNA Metabolism;DNA replication;DNA-replication;DNA polymerase II (EC 2.7.7.7);DNA polymerase II (EC 2.7.7.7)	1	1	0	1	0.467612	0.481361	1	1
SEED;DNA Metabolism;DNA replication;DNA-replication;Helicase PriA essential for oriC/DnaA-independent DNA replication;Helicase PriA essential for oriC/DnaA-independent DNA replication	1	1	0	1	0.467612	0.481361	1	1
SEED;Phages, Prophages, Transposable elements;Bacteriophage structural proteins;Phage_capsid_proteins;Phage major capsid protein;Phage major capsid protein	1	1	0	2	0.467612	0.481361	1	1
SEED;Respiration;Formate_hydrogenase;Formate dehydrogenase N gamma subunit (EC 1.2.1.2);Formate dehydrogenase N gamma subunit (EC 1.2.1.2)	1	1	0	1	0.467612	0.481361	1	1
SEED;Cell Division and Cell Cycle;Cell cycle in Prokaryota;Bacterial_Cytoskeleton;Z-ring-associated protein ZapA;Z-ring-associated protein ZapA	1	1	0	1	0.467612	0.481361	1	1
SEED;Regulation and Cell signaling;Programmed Cell Death and Toxin-antitoxin Systems;Murein_hydrolase_regulation_and_cell_death;Preprotein translocase subunit SecG (TC 3.A.5.1.1);Preprotein translocase subunit SecG (TC 3.A.5.1.1)	1	1	0	1	0.467612	0.481361	1	1
SEED;Virulence;Resistance to antibiotics and toxic compounds;Methicillin_resistance_in_Staphylococci;Methicillin_resistance_in_Staphylococci	0	1	0	1	1	0.481361	1	1
SEED;Virulence;Resistance to antibiotics and toxic compounds;Methicillin_resistance_in_Staphylococci;Undecaprenyl-phosphate N-acetylglucosaminyl 1-phosphate transferase (EC 2.7.8.-);Undecaprenyl-phosphate N-acetylglucosaminyl 1-phosphate transferase (EC 2.7.8.-)	0	1	0	1	1	0.481361	1	1
SEED;Virulence;Adhesion;Curli_production;Curli production assembly/transport component CsgE;Curli production assembly/transport component CsgE	0	1	0	1	1	0.481361	1	1
SEED;Virulence;Type III, Type IV, Type VI, ESAT secretion systems;Type_4_secretion_and_conjugative_transfer;IncF plasmid conjugative transfer pilin protein TraA;IncF plasmid conjugative transfer pilin protein TraA	0	1	0	1	1	0.481361	1	1
SEED;Virulence;Type III, Type IV, Type VI, ESAT secretion systems;Type_4_secretion_and_conjugative_transfer;IncF plasmid conjugative transfer pilus assembly protein TraL;IncF plasmid conjugative transfer pilus assembly protein TraL	0	1	0	2	1	0.481361	0.511635	1
SEED;Virulence;Type III, Type IV, Type VI, ESAT secretion systems;Type_4_secretion_and_conjugative_transfer;IncF plasmid conjugative transfer pilus assembly protein TraE;IncF plasmid conjugative transfer pilus assembly protein TraE	0	1	0	1	1	0.481361	1	1
SEED;Virulence;Type III, Type IV, Type VI, ESAT secretion systems;Type_4_secretion_and_conjugative_transfer;IncF plasmid conjugative transfer pilus assembly protein TraK;IncF plasmid conjugative transfer pilus assembly protein TraK	0	1	0	2	1	0.481361	0.511635	1
SEED;Virulence;Type III, Type IV, Type VI, ESAT secretion systems;Type_4_secretion_and_conjugative_transfer;IncF plasmid conjugative transfer pilus assembly protein TraB;IncF plasmid conjugative transfer pilus assembly protein TraB	0	1	0	2	1	0.481361	0.511635	1
SEED;Virulence;Type III, Type IV, Type VI, ESAT secretion systems;Type_4_secretion_and_conjugative_transfer;IncF plasmid conjugative transfer pilus assembly protein TraV;IncF plasmid conjugative transfer pilus assembly protein TraV	0	1	0	1	1	0.481361	1	1
SEED;Virulence;Type III, Type IV, Type VI, ESAT secretion systems;Type_4_secretion_and_conjugative_transfer;IncF plasmid conjugative transfer pilus assembly protein TraC;IncF plasmid conjugative transfer pilus assembly protein TraC	0	1	0	2	1	0.481361	0.511635	1
SEED;Virulence;Type III, Type IV, Type VI, ESAT secretion systems;Type_4_secretion_and_conjugative_transfer;IncF plasmid conjugative transfer protein TrbI;IncF plasmid conjugative transfer protein TrbI	0	1	0	1	1	0.481361	1	1
SEED;Virulence;Type III, Type IV, Type VI, ESAT secretion systems;Type_4_secretion_and_conjugative_transfer;IncF plasmid conjugative transfer pilus assembly protein TraW;IncF plasmid conjugative transfer pilus assembly protein TraW	0	1	0	1	1	0.481361	1	1
SEED;Virulence;Type III, Type IV, Type VI, ESAT secretion systems;Type_4_secretion_and_conjugative_transfer;IncF plasmid conjugative transfer pilus assembly protein TraU;IncF plasmid conjugative transfer pilus assembly protein TraU	0	1	0	2	1	0.481361	0.511635	1
SEED;Virulence;Type III, Type IV, Type VI, ESAT secretion systems;Type_4_secretion_and_conjugative_transfer;IncF plasmid conjugative transfer protein TrbC;IncF plasmid conjugative transfer protein TrbC	0	1	0	1	1	0.481361	1	1
SEED;Virulence;Type III, Type IV, Type VI, ESAT secretion systems;Type_4_secretion_and_conjugative_transfer;IncF plasmid conjugative transfer pilus assembly protein TraF;IncF plasmid conjugative transfer pilus assembly protein TraF	0	1	0	1	1	0.481361	1	1
SEED;Virulence;Type III, Type IV, Type VI, ESAT secretion systems;Type_4_secretion_and_conjugative_transfer;IncF plasmid conjugative transfer protein TrbB;IncF plasmid conjugative transfer protein TrbB	0	1	0	1	1	0.481361	1	1
SEED;Virulence;Type III, Type IV, Type VI, ESAT secretion systems;Type_4_secretion_and_conjugative_transfer;IncF plasmid conjugative transfer pilus assembly protein TraH;IncF plasmid conjugative transfer pilus assembly protein TraH	0	1	0	2	1	0.481361	0.511635	1
SEED;Virulence;Type III, Type IV, Type VI, ESAT secretion systems;Type_4_secretion_and_conjugative_transfer;IncF plasmid conjugative transfer protein TraG;IncF plasmid conjugative transfer protein TraG	0	1	0	2	1	0.481361	0.511635	1
SEED;Virulence;Type III, Type IV, Type VI, ESAT secretion systems;Type_4_secretion_and_conjugative_transfer;IncF plasmid conjugative transfer surface exclusion protein TraT;IncF plasmid conjugative transfer surface exclusion protein TraT	0	1	0	1	1	0.481361	1	1
SEED;Virulence;Type III, Type IV, Type VI, ESAT secretion systems;Type_4_secretion_and_conjugative_transfer;IncF plasmid conjugative transfer protein TraD;IncF plasmid conjugative transfer protein TraD	0	1	0	2	1	0.481361	0.511635	1
SEED;Stress Response;Oxidative stress;Glutathione:_Redox_cycle;Glutaredoxin 2;Glutaredoxin 2	0	1	0	2	1	0.481361	0.511635	1
SEED;Stress Response;Oxidative stress;Glutaredoxins;Glutaredoxin 2;Glutaredoxin 2	0	1	0	2	1	0.481361	0.511635	1
SEED;Protein Metabolism;Protein biosynthesis;Ribosome_LSU_bacterial;LSU ribosomal protein L36p;LSU ribosomal protein L36p	0	1	0	2	1	0.481361	0.511635	1
SEED;Protein Metabolism;Protein processing and modification;N-linked_Glycosylation_in_Bacteria;UDP-N-acetylglucosamine 4,6-dehydratase (EC 4.2.1.-);UDP-N-acetylglucosamine 4,6-dehydratase (EC 4.2.1.-)	0	1	0	1	1	0.481361	1	1
SEED;Cell Wall and Capsule;Gram-Positive cell wall components;Teichoic_and_lipoteichoic_acids_biosynthesis;Undecaprenyl-phosphate N-acetylglucosaminyl 1-phosphate transferase (EC 2.7.8.-);Undecaprenyl-phosphate N-acetylglucosaminyl 1-phosphate transferase (EC 2.7.8.-)	0	1	0	1	1	0.481361	1	1
SEED;Phages, Prophages, Transposable elements;Bacteriophage structural proteins;Phage_capsid_proteins;Phage capsid scaffolding protein;Phage capsid scaffolding protein	0	1	0	2	1	0.481361	0.511635	1
SEED;Phages, Prophages, Transposable elements;Bacteriophage structural proteins;Phage_capsid_proteins;Major capsid protein;Major capsid protein	0	1	0	2	1	0.481361	0.511635	1
SEED;Carbohydrates;Monosaccharides;D-Sorbitol(D-Glucitol)_and_L-Sorbose_Utilization;PTS system, glucitol/sorbitol-specific IIC component (EC 2.7.1.69);PTS system, glucitol/sorbitol-specific IIC component (EC 2.7.1.69)	0	0	2	0	0.502063	0.500651	1	1
SEED;Carbohydrates;Monosaccharides;D-Tagatose_and_Galactitol_Utilization;PTS system, galactitol-specific IIA component (EC 2.7.1.69);PTS system, galactitol-specific IIA component (EC 2.7.1.69)	0	0	2	0	0.502063	0.500651	1	1
SEED;Carbohydrates;Monosaccharides;D-Tagatose_and_Galactitol_Utilization;PTS system, galactitol-specific IIC component (EC 2.7.1.69);PTS system, galactitol-specific IIC component (EC 2.7.1.69)	0	0	2	0	0.502063	0.500651	1	1
SEED;Carbohydrates;One-carbon Metabolism;Formaldehyde_assimilation:_Ribulose_monophosphate_pathway;Formaldehyde_assimilation:_Ribulose_monophosphate_pathway	0	0	2	0	0.502063	0.500651	1	1
SEED;Carbohydrates;One-carbon Metabolism;Formaldehyde_assimilation:_Ribulose_monophosphate_pathway;6-phospho-3-hexuloisomerase;6-phospho-3-hexuloisomerase	0	0	2	0	0.502063	0.500651	1	1
SEED;Fatty Acids, Lipids, and Isoprenoids;Polyhydroxybutyrate_metabolism;D-beta-hydroxybutyrate dehydrogenase (EC 1.1.1.30);D-beta-hydroxybutyrate dehydrogenase (EC 1.1.1.30)	0	0	2	1	0.502063	0.500651	1	1
SEED;Nucleosides and Nucleotides;Purines;Xanthosine_utilization_(xap_region);Xanthosine_utilization_(xap_region)	0	0	2	0	0.502063	0.500651	1	1
SEED;Nucleosides and Nucleotides;Purines;Purine_conversions;Guanine deaminase (EC 3.5.4.3);Guanine deaminase (EC 3.5.4.3)	0	0	2	1	0.502063	0.500651	1	1
SEED;Metabolism of Aromatic Compounds;Peripheral pathways for catabolism of aromatic compounds;Salicylate_ester_degradation;Salicylate_ester_degradation	0	0	2	1	0.502063	0.500651	1	1
SEED;Metabolism of Aromatic Compounds;Peripheral pathways for catabolism of aromatic compounds;Salicylate_ester_degradation;Salicylate hydroxylase (EC 1.14.13.1);Salicylate hydroxylase (EC 1.14.13.1)	0	0	2	1	0.502063	0.500651	1	1
SEED;Carbohydrates;Di- and oligosaccharides;Maltose_and_Maltodextrin_Utilization;Zinc-type alcohol dehydrogenase YcjQ;Zinc-type alcohol dehydrogenase YcjQ	1	0	2	1	1	0.500651	1	1
SEED;Respiration;Electron donating reactions;Membrane-bound_Ni,_Fe-hydrogenase;Membrane-bound_Ni,_Fe-hydrogenase	1	0	2	1	1	0.500651	1	1
SEED;Respiration;Electron donating reactions;Membrane-bound_Ni,_Fe-hydrogenase;Hydrogenase nickel incorporation protein hypB;Hydrogenase nickel incorporation protein hypB	1	0	2	1	1	0.500651	1	1
SEED;Regulation and Cell signaling;DNA-binding_regulatory_proteins,_strays;LysR family transcriptional regulator STM3121;LysR family transcriptional regulator STM3121	1	0	2	1	1	0.500651	1	1
SEED;Metabolism of Aromatic Compounds;Peripheral pathways for catabolism of aromatic compounds;Peripheral pathways for catabolism of aromatic compounds	6	3	6	5	1	0.510386	0.544141	1
SEED;Protein Metabolism;Protein degradation;Proteolysis_in_bacteria,_ATP-dependent;ClpB protein;ClpB protein	3	2	1	3	0.34585	0.611517	0.702896	1
SEED;Protein Metabolism;Protein folding;Protein_chaperones;ClpB protein;ClpB protein	3	2	1	3	0.34585	0.611517	0.702896	1
SEED;Motility and Chemotaxis;Flagellar motility in Prokaryota;Flagellum;Flagellar hook-length control protein FliK;Flagellar hook-length control protein FliK	3	2	1	2	0.34585	0.611517	0.656312	1
SEED;Cell Wall and Capsule;Capsular and extracellular polysacchrides;Colanic_acid_biosynthesis;Low molecular weight protein-tyrosine-phosphatase Wzb (EC 3.1.3.48);Low molecular weight protein-tyrosine-phosphatase Wzb (EC 3.1.3.48)	3	2	1	2	0.34585	0.611517	0.656312	1
SEED;Carbohydrates;Monosaccharides;Hexose_Phosphate_Uptake_System;Transcriptional regulatory protein UhpA;Transcriptional regulatory protein UhpA	2	2	1	2	0.602338	0.611517	1	1
SEED;Protein Metabolism;Protein degradation;Proteolysis_in_bacteria,_ATP-dependent;ATP-dependent Clp protease proteolytic subunit (EC 3.4.21.92);ATP-dependent Clp protease proteolytic subunit (EC 3.4.21.92)	2	2	1	3	0.602338	0.611517	1	1
SEED;Motility and Chemotaxis;Flagellar motility in Prokaryota;Flagellar_motility;Chemotaxis regulator - transmits chemoreceptor signals to flagelllar motor components CheY;Chemotaxis regulator - transmits chemoreceptor signals to flagelllar motor components CheY	2	2	1	2	0.602338	0.611517	1	1
SEED;Motility and Chemotaxis;Bacterial_Chemotaxis;Chemotaxis regulator - transmits chemoreceptor signals to flagelllar motor components CheY;Chemotaxis regulator - transmits chemoreceptor signals to flagelllar motor components CheY	2	2	1	2	0.602338	0.611517	1	1
SEED;Amino Acids and Derivatives;Lysine, threonine, methionine, and cysteine.1;Cysteine_Biosynthesis;Sulfate permease;Sulfate permease	2	2	1	3	0.602338	0.611517	1	1
SEED;Regulation and Cell signaling;Two-component_regulatory_systems_in_Campylobacter;Chemotaxis regulator - transmits chemoreceptor signals to flagelllar motor components CheY;Chemotaxis regulator - transmits chemoreceptor signals to flagelllar motor components CheY	2	2	1	2	0.602338	0.611517	1	1
SEED;Carbohydrates;Monosaccharides;Hexose_Phosphate_Uptake_System;Hexose phosphate uptake regulatory protein UhpC;Hexose phosphate uptake regulatory protein UhpC	1	2	1	2	1	0.611517	1	1
SEED;Carbohydrates;Monosaccharides;Hexose_Phosphate_Uptake_System;Sensor histidine protein kinase UhpB, glucose-6-phosphate specific (EC 2.7.13.3);Sensor histidine protein kinase UhpB, glucose-6-phosphate specific (EC 2.7.13.3)	1	2	1	2	1	0.611517	1	1
SEED;Carbohydrates;Di- and oligosaccharides;Maltose_and_Maltodextrin_Utilization;Maltose/maltodextrin ABC transporter, substrate binding periplasmic protein MalE;Maltose/maltodextrin ABC transporter, substrate binding periplasmic protein MalE	1	2	1	2	1	0.611517	1	1
SEED;Cofactors, Vitamins, Prosthetic Groups, Pigments;Folate and pterines;Folate_Biosynthesis;Dihydropteroate synthase (EC 2.5.1.15);Dihydropteroate synthase (EC 2.5.1.15)	1	2	1	2	1	0.611517	1	1
SEED;Cofactors, Vitamins, Prosthetic Groups, Pigments;Pyridoxine;Pyridoxin_(Vitamin_B6)_Biosynthesis;4-hydroxythreonine-4-phosphate dehydrogenase (EC 1.1.1.262);4-hydroxythreonine-4-phosphate dehydrogenase (EC 1.1.1.262)	1	2	1	2	1	0.611517	1	1
SEED;Virulence;Type III, Type IV, Type VI, ESAT secretion systems;Type_4_conjugative_transfer_system,_IncI1_type;IncI1 plasmid conjugative transfer putative membrane protein PilT;IncI1 plasmid conjugative transfer putative membrane protein PilT	1	2	1	3	1	0.611517	0.642247	1
SEED;Virulence;Iron Scavenging Mechanisms;Iron_acquisition_in_Vibrio;Ferric iron ABC transporter, iron-binding protein;Ferric iron ABC transporter, iron-binding protein	0	2	1	2	1	0.611517	0.511635	1
SEED;Virulence;Iron Scavenging Mechanisms;Campylobacter_Iron_Metabolism;Ferric iron ABC transporter, iron-binding protein;Ferric iron ABC transporter, iron-binding protein	0	2	1	2	1	0.611517	0.511635	1
SEED;Virulence;Iron Scavenging Mechanisms;Transport_of_Iron;Ferric iron ABC transporter, iron-binding protein;Ferric iron ABC transporter, iron-binding protein	0	2	1	2	1	0.611517	0.511635	1
SEED;Motility and Chemotaxis;Flagellar motility in Prokaryota;Flagellar_motility;Flagellin;Flagellin	0	2	1	2	1	0.611517	0.511635	1
SEED;Motility and Chemotaxis;Bacterial_Chemotaxis;Maltose/maltodextrin ABC transporter, substrate binding periplasmic protein MalE;Maltose/maltodextrin ABC transporter, substrate binding periplasmic protein MalE	1	2	1	2	1	0.611517	1	1
SEED;DNA Metabolism;DNA repair;DNA_repair,_bacterial;Methyl-directed repair DNA adenine methylase (EC 2.1.1.72);Methyl-directed repair DNA adenine methylase (EC 2.1.1.72)	1	2	1	3	1	0.611517	0.642247	1
SEED;DNA Metabolism;DNA replication;DNA-replication;DNA replication protein DnaC;DNA replication protein DnaC	1	2	1	2	1	0.611517	1	1
SEED;Amino Acids and Derivatives;Arginine; urea cycle, polyamines;Polyamine_Metabolism;Carbamate kinase (EC 2.7.2.2);Carbamate kinase (EC 2.7.2.2)	2	1	3	2	1	0.625976	1	1
SEED;Regulation and Cell signaling;Programmed Cell Death and Toxin-antitoxin Systems;Programmed Cell Death and Toxin-antitoxin Systems	8	10	8	14	0.807666	0.638902	0.668551	1
SEED;Amino Acids and Derivatives;Lysine, threonine, methionine, and cysteine.1;Methionine_Degradation;Methionine_Degradation	11	9	12	11	1	0.667997	0.520427	1
SEED;RNA Metabolism;RNA processing and modification;Polyadenylation_bacterial;Polyadenylation_bacterial	3	3	2	3	0.669966	0.676678	0.702896	1
SEED;Respiration;Electron accepting reactions;Anaerobic_respiratory_reductases;Anaerobic dimethyl sulfoxide reductase chain C (EC 1.8.99.-);Anaerobic dimethyl sulfoxide reductase chain C (EC 1.8.99.-)	3	3	2	3	0.669966	0.676678	0.702896	1
SEED;Amino Acids and Derivatives;Alanine, serine, and glycine;Glycine_and_Serine_Utilization;Glycine_and_Serine_Utilization	14	11	15	15	1	0.695087	0.574406	1
SEED;Virulence;Pathogenicity islands;Staphylococcal_pathogenicity_islands_SaPI;Methionine ABC transporter substrate-binding protein;Methionine ABC transporter substrate-binding protein	3	3	5	3	0.731043	0.727983	0.702896	1
SEED;Amino Acids and Derivatives;Lysine, threonine, methionine, and cysteine.1;Methionine_Degradation;Methionine ABC transporter substrate-binding protein;Methionine ABC transporter substrate-binding protein	3	3	5	3	0.731043	0.727983	0.702896	1
SEED;Amino Acids and Derivatives;Lysine, threonine, methionine, and cysteine.1;Methionine_Biosynthesis;Methionine ABC transporter substrate-binding protein;Methionine ABC transporter substrate-binding protein	3	3	5	3	0.731043	0.727983	0.702896	1
SEED;Cell Wall and Capsule;Cell wall of Mycobacteria;linker_unit-arabinogalactan_synthesis;linker_unit-arabinogalactan_synthesis	4	3	5	3	1	0.727983	0.466604	1
SEED;Stress Response;Oxidative stress;Glutaredoxins;Glutaredoxins	4	5	4	7	1	0.746033	0.768796	1
SEED;Carbohydrates;Di- and oligosaccharides;Beta-Glucoside_Metabolism;PTS system, cellobiose-specific IIC component (EC 2.7.1.69);PTS system, cellobiose-specific IIC component (EC 2.7.1.69)	5	4	6	5	1	0.755503	0.751943	1
SEED;Protein Metabolism;Secretion;Secretion	5	6	5	8	1	0.767493	1	1
SEED;Cell Wall and Capsule;Gram-Negative cell wall components;Lipid_A_modifications;Lipid_A_modifications	9	8	7	11	0.464508	0.79811	0.824231	1
SEED;RNA Metabolism;Transcription;Transcription_initiation,_bacterial_sigma_factors;Transcription_initiation,_bacterial_sigma_factors	11	9	11	12	0.8322	0.82608	0.674366	1
SEED;Cofactors, Vitamins, Prosthetic Groups, Pigments;Quinone cofactors;Pyrroloquinoline_Quinone_biosynthesis;Pyrroloquinoline_Quinone_biosynthesis	5	0	0	0	0.0223871	1	0.0136756	1
SEED;Cofactors, Vitamins, Prosthetic Groups, Pigments;Quinone cofactors;Coenzyme_PQQ_synthesis;Coenzyme_PQQ_synthesis	4	0	0	0	0.0478502	1	0.0322578	1
SEED;Membrane Transport;Transport_of_Manganese;Transport_of_Manganese	6	2	2	2	0.157792	1	0.0783341	1
SEED;DNA Metabolism;Restriction-Modification_System;Type III restriction-modification system methylation subunit (EC 2.1.1.72);Type III restriction-modification system methylation subunit (EC 2.1.1.72)	2	0	0	0	0.218689	1	0.179554	1
SEED;Phages, Prophages, Transposable elements;IbrA_and_IbrB:_co-activators_of_prophage_gene_expression;IbrA_and_IbrB:_co-activators_of_prophage_gene_expression	2	0	0	1	0.218689	1	0.577795	1
SEED;Motility and Chemotaxis;Flagellar motility in Prokaryota;Flagellar_motility;Flagellar motor rotation protein MotB;Flagellar motor rotation protein MotB	3	1	1	2	0.34585	1	0.656312	1
SEED;Motility and Chemotaxis;Flagellar motility in Prokaryota;Flagellum;Flagellar motor rotation protein MotB;Flagellar motor rotation protein MotB	3	1	1	2	0.34585	1	0.656312	1
SEED;Carbohydrates;Monosaccharides;L-ascorbate_utilization_(and_related_gene_clusters);Ascorbate-specific PTS system, EIIC component;Ascorbate-specific PTS system, EIIC component	1	0	0	1	0.467612	1	1	1
SEED;Carbohydrates;Fermentation;Acetoin,_butanediol_metabolism;Alpha-acetolactate decarboxylase (EC 4.1.1.5);Alpha-acetolactate decarboxylase (EC 4.1.1.5)	1	0	0	0	0.467612	1	0.423708	1
SEED;Carbohydrates;Sugar alcohols;Ribitol,_Xylitol,_Arabitol,_Mannitol_and_Sorbitol_utilization;Fructokinase (EC 2.7.1.4);Fructokinase (EC 2.7.1.4)	1	0	0	0	0.467612	1	0.423708	1
SEED;Carbohydrates;Organic acids;Tricarballylate_Utilization;Tricarballylate_Utilization	1	0	0	0	0.467612	1	0.423708	1
SEED;Carbohydrates;Organic acids;Tricarballylate_Utilization;TcuC: integral membrane protein used to transport tricarballylate across the cell membrane;TcuC: integral membrane protein used to transport tricarballylate across the cell membrane	1	0	0	0	0.467612	1	0.423708	1
SEED;Carbohydrates;Organic acids;Propionyl-CoA_to_Succinyl-CoA_Module;Propionyl-CoA_to_Succinyl-CoA_Module	1	0	0	0	0.467612	1	0.423708	1
SEED;Carbohydrates;Organic acids;Propionyl-CoA_to_Succinyl-CoA_Module;Na+/H+-dicarboxylate symporters;Na+/H+-dicarboxylate symporters	1	0	0	0	0.467612	1	0.423708	1
SEED;Carbohydrates;Central carbohydrate metabolism;TCA_Cycle;Citrate lyase gamma chain, acyl carrier protein (EC 4.1.3.6);Citrate lyase gamma chain, acyl carrier protein (EC 4.1.3.6)	1	0	0	0	0.467612	1	0.423708	1
SEED;Carbohydrates;Di- and oligosaccharides;Fructooligosaccharides(FOS)_and_Raffinose_Utilization;Alpha-mannosidase (EC 3.2.1.24);Alpha-mannosidase (EC 3.2.1.24)	1	0	0	0	0.467612	1	0.423708	1
SEED;Cofactors, Vitamins, Prosthetic Groups, Pigments;Quinone cofactors;Pyrroloquinoline_Quinone_biosynthesis;Coenzyme PQQ synthesis protein B;Coenzyme PQQ synthesis protein B	1	0	0	0	0.467612	1	0.423708	1
SEED;Cofactors, Vitamins, Prosthetic Groups, Pigments;Quinone cofactors;Pyrroloquinoline_Quinone_biosynthesis;Coenzyme PQQ synthesis protein C;Coenzyme PQQ synthesis protein C	1	0	0	0	0.467612	1	0.423708	1
SEED;Cofactors, Vitamins, Prosthetic Groups, Pigments;Quinone cofactors;Pyrroloquinoline_Quinone_biosynthesis;Coenzyme PQQ synthesis protein D;Coenzyme PQQ synthesis protein D	1	0	0	0	0.467612	1	0.423708	1
SEED;Cofactors, Vitamins, Prosthetic Groups, Pigments;Quinone cofactors;Pyrroloquinoline_Quinone_biosynthesis;Coenzyme PQQ synthesis protein E;Coenzyme PQQ synthesis protein E	1	0	0	0	0.467612	1	0.423708	1
SEED;Cofactors, Vitamins, Prosthetic Groups, Pigments;Quinone cofactors;Pyrroloquinoline_Quinone_biosynthesis;Microsomal dipeptidase (EC 3.4.13.19);Microsomal dipeptidase (EC 3.4.13.19)	1	0	0	0	0.467612	1	0.423708	1
SEED;Cofactors, Vitamins, Prosthetic Groups, Pigments;Quinone cofactors;Coenzyme_PQQ_synthesis;Coenzyme PQQ synthesis protein B;Coenzyme PQQ synthesis protein B	1	0	0	0	0.467612	1	0.423708	1
SEED;Cofactors, Vitamins, Prosthetic Groups, Pigments;Quinone cofactors;Coenzyme_PQQ_synthesis;Coenzyme PQQ synthesis protein C;Coenzyme PQQ synthesis protein C	1	0	0	0	0.467612	1	0.423708	1
SEED;Cofactors, Vitamins, Prosthetic Groups, Pigments;Quinone cofactors;Coenzyme_PQQ_synthesis;Coenzyme PQQ synthesis protein D;Coenzyme PQQ synthesis protein D	1	0	0	0	0.467612	1	0.423708	1
SEED;Cofactors, Vitamins, Prosthetic Groups, Pigments;Quinone cofactors;Coenzyme_PQQ_synthesis;Coenzyme PQQ synthesis protein E;Coenzyme PQQ synthesis protein E	1	0	0	0	0.467612	1	0.423708	1
SEED;Virulence;Iron Scavenging Mechanisms;Heme,_hemin_uptake_and_utilization_systems_in_GramPositives;Iron compound ABC uptake transporter ATP-binding protein PiaD;Iron compound ABC uptake transporter ATP-binding protein PiaD	1	0	0	0	0.467612	1	0.423708	1
SEED;Virulence;Iron Scavenging Mechanisms;Iron_acquisition_in_Vibrio;Ferric hydroxamate outer membrane receptor FhuA;Ferric hydroxamate outer membrane receptor FhuA	1	0	0	1	0.467612	1	1	1
SEED;Virulence;Iron Scavenging Mechanisms;Iron_acquisition_in_Vibrio;Ferric uptake regulation protein FUR;Ferric uptake regulation protein FUR	1	0	0	0	0.467612	1	0.423708	1
SEED;Virulence;Iron Scavenging Mechanisms;Siderophore_Aerobactin;Ferric hydroxamate outer membrane receptor FhuA;Ferric hydroxamate outer membrane receptor FhuA	1	0	0	1	0.467612	1	1	1
SEED;Virulence;Iron Scavenging Mechanisms;Transport_of_Iron;Ferric uptake regulation protein FUR;Ferric uptake regulation protein FUR	1	0	0	0	0.467612	1	0.423708	1
SEED;Stress Response;Oxidative stress;Oxidative_stress;Ferric uptake regulation protein FUR;Ferric uptake regulation protein FUR	1	0	0	0	0.467612	1	0.423708	1
SEED;Stress Response;SigmaB_stress_responce_regulation;Serine phosphatase RsbU, regulator of sigma subunit;Serine phosphatase RsbU, regulator of sigma subunit	1	0	0	0	0.467612	1	0.423708	1
SEED;Stress Response;SigmaB_stress_responce_regulation;Serine-protein kinase rsbW (EC 2.7.11.1);Serine-protein kinase rsbW (EC 2.7.11.1)	1	0	0	0	0.467612	1	0.423708	1
SEED;Stress Response;Acid stress;Acid stress	1	0	0	1	0.467612	1	1	1
SEED;Stress Response;Acid stress;Acid_resistance_mechanisms;Acid_resistance_mechanisms	1	0	0	1	0.467612	1	1	1
SEED;Stress Response;Acid stress;Acid_resistance_mechanisms;Arginine/agmatine antiporter;Arginine/agmatine antiporter	1	0	0	1	0.467612	1	1	1
SEED;RNA Metabolism;Group_II_intron-associated_genes;Group_II_intron-associated_genes	1	0	0	0	0.467612	1	0.423708	1
SEED;RNA Metabolism;Group_II_intron-associated_genes;Retron-type reverse transcriptase;Retron-type reverse transcriptase	1	0	0	0	0.467612	1	0.423708	1
SEED;Motility and Chemotaxis;Flagellar motility in Prokaryota;Flagellar_motility;Motility accessory factor;Motility accessory factor	1	0	0	0	0.467612	1	0.423708	1
SEED;Motility and Chemotaxis;Flagellar motility in Prokaryota;Flagellum_in_Campylobacter;Flagellin protein FlaA;Flagellin protein FlaA	1	0	0	0	0.467612	1	0.423708	1
SEED;Motility and Chemotaxis;Flagellar motility in Prokaryota;Flagellum;Flagellar biosynthesis protein FliC;Flagellar biosynthesis protein FliC	1	0	0	0	0.467612	1	0.423708	1
SEED;Motility and Chemotaxis;Flagellar motility in Prokaryota;Flagellum;Flagellin protein FlaA;Flagellin protein FlaA	1	0	0	0	0.467612	1	0.423708	1
SEED;Motility and Chemotaxis;Flagellar motility in Prokaryota;Flagellum;Negative regulator of flagellin synthesis FlgM;Negative regulator of flagellin synthesis FlgM	1	0	0	0	0.467612	1	0.423708	1
SEED;Amino Acids and Derivatives;Arginine; urea cycle, polyamines;Polyamine_Metabolism;Arginine/agmatine antiporter;Arginine/agmatine antiporter	1	0	0	1	0.467612	1	1	1
SEED;Amino Acids and Derivatives;Arginine; urea cycle, polyamines;Polyamine_Metabolism;DNA-binding response regulator, LuxR family, near polyamine transporter;DNA-binding response regulator, LuxR family, near polyamine transporter	1	0	0	0	0.467612	1	0.423708	1
SEED;Amino Acids and Derivatives;Arginine; urea cycle, polyamines;Arginine_and_Ornithine_Degradation;Arginine/agmatine antiporter;Arginine/agmatine antiporter	1	0	0	1	0.467612	1	1	1
SEED;Amino Acids and Derivatives;Lysine, threonine, methionine, and cysteine.1;Methionine_Degradation;Adenosylhomocysteinase (EC 3.3.1.1);Adenosylhomocysteinase (EC 3.3.1.1)	1	0	0	0	0.467612	1	0.423708	1
SEED;Clustering-based subsystems;Type III secretion system related;CBSS-343509.6.peg.2644;COG0840: Methyl-accepting chemotaxis protein;COG0840: Methyl-accepting chemotaxis protein	1	0	0	0	0.467612	1	0.423708	1
SEED;Clustering-based subsystems;Bacterial_RNA-metabolizing_Zn-dependent_hydrolases;Ferric uptake regulation protein FUR;Ferric uptake regulation protein FUR	1	0	0	0	0.467612	1	0.423708	1
SEED;Cell Wall and Capsule;Capsular and extracellular polysacchrides;Sialic_Acid_Metabolism;Sialic acid transporter (permease) NanT;Sialic acid transporter (permease) NanT	1	0	0	0	0.467612	1	0.423708	1
SEED;Cell Wall and Capsule;Gram-Negative cell wall components;LOS_core_oligosaccharide_biosynthesis;Beta-1,4-galactosyltransferase;Beta-1,4-galactosyltransferase	1	0	0	0	0.467612	1	0.423708	1
SEED;Cell Wall and Capsule;Gram-Negative cell wall components;LOS_core_oligosaccharide_biosynthesis;Putative two-domain glycosyltransferase;Putative two-domain glycosyltransferase	1	0	0	1	0.467612	1	1	1
SEED;Metabolism of Aromatic Compounds;Peripheral pathways for catabolism of aromatic compounds;Phenylpropanoid_compound_degradation;Protein involved in meta-pathway of phenol degradation;Protein involved in meta-pathway of phenol degradation	1	0	0	0	0.467612	1	0.423708	1
SEED;DNA Metabolism;DNA repair;DNA_repair,_bacterial;Recombinational DNA repair protein RecT (prophage associated);Recombinational DNA repair protein RecT (prophage associated)	1	0	0	0	0.467612	1	0.423708	1
SEED;DNA Metabolism;Restriction-Modification_System;Putative DNA-binding protein in cluster with Type I restriction-modification system;Putative DNA-binding protein in cluster with Type I restriction-modification system	1	0	0	0	0.467612	1	0.423708	1
SEED;Phages, Prophages, Transposable elements;IbrA_and_IbrB:_co-activators_of_prophage_gene_expression;Co-activator of prophage gene expression IbrA;Co-activator of prophage gene expression IbrA	1	0	0	0	0.467612	1	0.423708	1
SEED;Phages, Prophages, Transposable elements;IbrA_and_IbrB:_co-activators_of_prophage_gene_expression;Co-activator of prophage gene expression IbrB;Co-activator of prophage gene expression IbrB	1	0	0	1	0.467612	1	1	1
SEED;Phages, Prophages, Transposable elements;Listeria_phi-A118-like_prophages;Listeria_phi-A118-like_prophages	1	0	0	0	0.467612	1	0.423708	1
SEED;Phages, Prophages, Transposable elements;Listeria_phi-A118-like_prophages;Recombinational DNA repair protein RecT (prophage associated);Recombinational DNA repair protein RecT (prophage associated)	1	0	0	0	0.467612	1	0.423708	1
SEED;Membrane Transport;Transport_of_Manganese;Manganese ABC transporter, periplasmic-binding protein SitA;Manganese ABC transporter, periplasmic-binding protein SitA	1	0	0	0	0.467612	1	0.423708	1
SEED;Membrane Transport;Transport_of_Manganese;Manganese ABC transporter, ATP-binding protein SitB;Manganese ABC transporter, ATP-binding protein SitB	1	0	0	0	0.467612	1	0.423708	1
SEED;Membrane Transport;Transport_of_Manganese;Manganese ABC transporter, inner membrane permease protein SitC;Manganese ABC transporter, inner membrane permease protein SitC	1	0	0	0	0.467612	1	0.423708	1
SEED;Membrane Transport;Transport_of_Manganese;Manganese ABC transporter, inner membrane permease protein SitD;Manganese ABC transporter, inner membrane permease protein SitD	1	0	0	0	0.467612	1	0.423708	1
SEED;Respiration;Electron donating reactions;NiFe_hydrogenase_maturation;[NiFe] hydrogenase metallocenter assembly protein HybG;[NiFe] hydrogenase metallocenter assembly protein HybG	1	0	0	0	0.467612	1	0.423708	1
SEED;Cell Division and Cell Cycle;Cell cycle in Prokaryota;Cyanobacterial_Circadian_Clock;Cyanobacterial_Circadian_Clock	1	0	0	0	0.467612	1	0.423708	1
SEED;Cell Division and Cell Cycle;Cell cycle in Prokaryota;Cyanobacterial_Circadian_Clock;Circadian input kinase A;Circadian input kinase A	1	0	0	0	0.467612	1	0.423708	1
SEED;Cell Division and Cell Cycle;Cell cycle in Prokaryota;Two_cell_division_clusters_relating_to_chromosome_partitioning;Chromosome partition protein smc;Chromosome partition protein smc	1	0	0	0	0.467612	1	0.423708	1
SEED;Regulation and Cell signaling;Orphan_regulatory_proteins;Transcriptional regulatory protein CitB, DpiA;Transcriptional regulatory protein CitB, DpiA	1	0	0	0	0.467612	1	0.423708	1
SEED;Regulation and Cell signaling;Orphan_regulatory_proteins;Hybrid sensory histidine kinase in two-component regulatory system with EvgA;Hybrid sensory histidine kinase in two-component regulatory system with EvgA	1	0	0	0	0.467612	1	0.423708	1
SEED;Regulation and Cell signaling;Two-component_regulatory_systems_in_Campylobacter;Putative two-component response regulator;Putative two-component response regulator	1	0	0	1	0.467612	1	1	1
SEED;Virulence;Iron Scavenging Mechanisms;Iron_acquisition_in_Vibrio;Ferric iron ABC transporter, permease protein;Ferric iron ABC transporter, permease protein	0	2	2	2	0.502063	1	0.511635	1
SEED;Virulence;Iron Scavenging Mechanisms;Campylobacter_Iron_Metabolism;Ferric iron ABC transporter, permease protein;Ferric iron ABC transporter, permease protein	0	2	2	2	0.502063	1	0.511635	1
SEED;Virulence;Iron Scavenging Mechanisms;Transport_of_Iron;Ferric iron ABC transporter, permease protein;Ferric iron ABC transporter, permease protein	0	2	2	2	0.502063	1	0.511635	1
SEED;Stress Response;Hfl_operon;Hfl_operon	6	4	4	5	0.530186	1	0.544141	1
SEED;Amino Acids and Derivatives;Branched-chain amino acids;Leucine_Biosynthesis;Leucine_Biosynthesis	8	6	6	8	0.593681	1	0.615876	1
SEED;Carbohydrates;Sugar alcohols;Glycerol_and_Glycerol-3-phosphate_Uptake_and_Utilization;Glycerol-3-phosphate regulon repressor, DeoR family;Glycerol-3-phosphate regulon repressor, DeoR family	2	1	1	1	0.602338	1	0.577795	1
SEED;Carbohydrates;Aminosugars;Chitin_and_N-acetylglucosamine_utilization;N-acetylglucosamine-6-phosphate deacetylase (EC 3.5.1.25);N-acetylglucosamine-6-phosphate deacetylase (EC 3.5.1.25)	2	1	1	1	0.602338	1	0.577795	1
SEED;Cofactors, Vitamins, Prosthetic Groups, Pigments;Quinone cofactors;Ubiquinone_Biosynthesis;3-demethylubiquinone-9 3-methyltransferase (EC 2.1.1.64);3-demethylubiquinone-9 3-methyltransferase (EC 2.1.1.64)	2	1	1	1	0.602338	1	0.577795	1
SEED;Virulence;Resistance to antibiotics and toxic compounds;Multidrug_Resistance_Efflux_Pumps;Transcription repressor of multidrug efflux pump acrAB operon, TetR (AcrR) family;Transcription repressor of multidrug efflux pump acrAB operon, TetR (AcrR) family	2	1	1	1	0.602338	1	0.577795	1
SEED;Virulence;Resistance to antibiotics and toxic compounds;Multidrug_Resistance_Efflux_Pumps;Multidrug-efflux transporter, major facilitator superfamily (MFS) (TC 2.A.1);Multidrug-efflux transporter, major facilitator superfamily (MFS) (TC 2.A.1)	2	1	1	1	0.602338	1	0.577795	1
SEED;Virulence;Iron Scavenging Mechanisms;Campylobacter_Iron_Metabolism;Magnesium and cobalt transport protein CorA;Magnesium and cobalt transport protein CorA	2	1	1	1	0.602338	1	0.577795	1
SEED;Stress Response;Hfl_operon;GTP-binding protein HflX;GTP-binding protein HflX	2	1	1	1	0.602338	1	0.577795	1
SEED;Protein Metabolism;Protein biosynthesis;Translation_initiation_factors_eukaryotic_and_archaeal;Translation initiation factor 2;Translation initiation factor 2	2	1	1	1	0.602338	1	0.577795	1
SEED;Protein Metabolism;Protein biosynthesis;Universal_GTPases;Translation initiation factor 2;Translation initiation factor 2	2	1	1	1	0.602338	1	0.577795	1
SEED;Protein Metabolism;Protein biosynthesis;Universal_GTPases;GTP-binding protein HflX;GTP-binding protein HflX	2	1	1	1	0.602338	1	0.577795	1
SEED;Protein Metabolism;Protein degradation;Protein_degradation;Asp-X dipeptidase;Asp-X dipeptidase	2	1	1	1	0.602338	1	0.577795	1
SEED;RNA Metabolism;Transcription;Transcription_initiation,_bacterial_sigma_factors;RNA polymerase sigma factor RpoE;RNA polymerase sigma factor RpoE	2	1	1	1	0.602338	1	0.577795	1
SEED;RNA Metabolism;Transcription;Transcription_initiation,_bacterial_sigma_factors;RNA polymerase sigma factor for flagellar operon;RNA polymerase sigma factor for flagellar operon	2	1	1	2	0.602338	1	1	1
SEED;RNA Metabolism;RNA processing and modification;RNA_processing_and_degradation,_bacterial;Ribonuclease III (EC 3.1.26.3);Ribonuclease III (EC 3.1.26.3)	2	1	1	1	0.602338	1	0.577795	1
SEED;Motility and Chemotaxis;Flagellar motility in Prokaryota;Flagellar_motility;Flagellar biosynthesis protein FlhA;Flagellar biosynthesis protein FlhA	2	1	1	2	0.602338	1	1	1
SEED;Motility and Chemotaxis;Flagellar motility in Prokaryota;Flagellar_motility;Flagellar biosynthesis protein FlhB;Flagellar biosynthesis protein FlhB	2	1	1	2	0.602338	1	1	1
SEED;Motility and Chemotaxis;Flagellar motility in Prokaryota;Flagellar_motility;Flagellum-specific ATP synthase FliI;Flagellum-specific ATP synthase FliI	2	1	1	2	0.602338	1	1	1
SEED;Motility and Chemotaxis;Flagellar motility in Prokaryota;Flagellar_motility;Flagellar biosynthesis protein FliR;Flagellar biosynthesis protein FliR	2	1	1	2	0.602338	1	1	1
SEED;Motility and Chemotaxis;Flagellar motility in Prokaryota;Flagellar_motility;Flagellar basal-body rod modification protein FlgD;Flagellar basal-body rod modification protein FlgD	2	1	1	2	0.602338	1	1	1
SEED;Motility and Chemotaxis;Flagellar motility in Prokaryota;Flagellar_motility;Flagellar L-ring protein FlgH;Flagellar L-ring protein FlgH	2	1	1	2	0.602338	1	1	1
SEED;Motility and Chemotaxis;Flagellar motility in Prokaryota;Flagellar_motility;Flagellar motor rotation protein MotA;Flagellar motor rotation protein MotA	2	1	1	2	0.602338	1	1	1
SEED;Motility and Chemotaxis;Flagellar motility in Prokaryota;Flagellar_motility;Flagellar motor switch protein FliM;Flagellar motor switch protein FliM	2	1	1	2	0.602338	1	1	1
SEED;Motility and Chemotaxis;Flagellar motility in Prokaryota;Flagellar_motility;Flagellar motor switch protein FliN;Flagellar motor switch protein FliN	2	1	1	2	0.602338	1	1	1
SEED;Motility and Chemotaxis;Flagellar motility in Prokaryota;Flagellar_motility;RNA polymerase sigma factor for flagellar operon;RNA polymerase sigma factor for flagellar operon	2	1	1	2	0.602338	1	1	1
SEED;Motility and Chemotaxis;Flagellar motility in Prokaryota;Flagellum_in_Campylobacter;Flagellar basal-body rod protein FlgB;Flagellar basal-body rod protein FlgB	2	1	1	2	0.602338	1	1	1
SEED;Motility and Chemotaxis;Flagellar motility in Prokaryota;Flagellum_in_Campylobacter;Flagellar basal-body rod protein FlgC;Flagellar basal-body rod protein FlgC	2	1	1	2	0.602338	1	1	1
SEED;Motility and Chemotaxis;Flagellar motility in Prokaryota;Flagellum_in_Campylobacter;Flagellar hook-basal body complex protein FliE;Flagellar hook-basal body complex protein FliE	2	1	1	2	0.602338	1	1	1
SEED;Motility and Chemotaxis;Flagellar motility in Prokaryota;Flagellum;Flagellar basal-body P-ring formation protein FlgA;Flagellar basal-body P-ring formation protein FlgA	2	1	1	2	0.602338	1	1	1
SEED;Motility and Chemotaxis;Flagellar motility in Prokaryota;Flagellum;Flagellar basal-body rod protein FlgB;Flagellar basal-body rod protein FlgB	2	1	1	2	0.602338	1	1	1
SEED;Motility and Chemotaxis;Flagellar motility in Prokaryota;Flagellum;Flagellar basal-body rod protein FlgC;Flagellar basal-body rod protein FlgC	2	1	1	2	0.602338	1	1	1
SEED;Motility and Chemotaxis;Flagellar motility in Prokaryota;Flagellum;Flagellar basal-body rod modification protein FlgD;Flagellar basal-body rod modification protein FlgD	2	1	1	2	0.602338	1	1	1
SEED;Motility and Chemotaxis;Flagellar motility in Prokaryota;Flagellum;Flagellar hook protein FlgE;Flagellar hook protein FlgE	2	1	1	2	0.602338	1	1	1
SEED;Motility and Chemotaxis;Flagellar motility in Prokaryota;Flagellum;Flagellar basal-body rod protein FlgF;Flagellar basal-body rod protein FlgF	2	1	1	2	0.602338	1	1	1
SEED;Motility and Chemotaxis;Flagellar motility in Prokaryota;Flagellum;Flagellar basal-body rod protein FlgG;Flagellar basal-body rod protein FlgG	2	1	1	2	0.602338	1	1	1
SEED;Motility and Chemotaxis;Flagellar motility in Prokaryota;Flagellum;Flagellar L-ring protein FlgH;Flagellar L-ring protein FlgH	2	1	1	2	0.602338	1	1	1
SEED;Motility and Chemotaxis;Flagellar motility in Prokaryota;Flagellum;Flagellar P-ring protein FlgI;Flagellar P-ring protein FlgI	2	1	1	2	0.602338	1	1	1
SEED;Motility and Chemotaxis;Flagellar motility in Prokaryota;Flagellum;Flagellar hook-associated protein FlgK;Flagellar hook-associated protein FlgK	2	1	1	2	0.602338	1	1	1
SEED;Motility and Chemotaxis;Flagellar motility in Prokaryota;Flagellum;Flagellar biosynthesis protein FlhA;Flagellar biosynthesis protein FlhA	2	1	1	2	0.602338	1	1	1
SEED;Motility and Chemotaxis;Flagellar motility in Prokaryota;Flagellum;Flagellar hook-basal body complex protein FliE;Flagellar hook-basal body complex protein FliE	2	1	1	2	0.602338	1	1	1
SEED;Motility and Chemotaxis;Flagellar motility in Prokaryota;Flagellum;Flagellar assembly protein FliH;Flagellar assembly protein FliH	2	1	1	2	0.602338	1	1	1
SEED;Motility and Chemotaxis;Flagellar motility in Prokaryota;Flagellum;Flagellum-specific ATP synthase FliI;Flagellum-specific ATP synthase FliI	2	1	1	2	0.602338	1	1	1
SEED;Motility and Chemotaxis;Flagellar motility in Prokaryota;Flagellum;Flagellar protein FliJ;Flagellar protein FliJ	2	1	1	2	0.602338	1	1	1
SEED;Motility and Chemotaxis;Flagellar motility in Prokaryota;Flagellum;Flagellar motor switch protein FliM;Flagellar motor switch protein FliM	2	1	1	2	0.602338	1	1	1
SEED;Motility and Chemotaxis;Flagellar motility in Prokaryota;Flagellum;Flagellar motor switch protein FliN;Flagellar motor switch protein FliN	2	1	1	2	0.602338	1	1	1
SEED;Motility and Chemotaxis;Flagellar motility in Prokaryota;Flagellum;Flagellar biosynthesis protein FliP;Flagellar biosynthesis protein FliP	2	1	1	2	0.602338	1	1	1
SEED;Motility and Chemotaxis;Flagellar motility in Prokaryota;Flagellum;Flagellar biosynthesis protein FliQ;Flagellar biosynthesis protein FliQ	2	1	1	2	0.602338	1	1	1
SEED;Motility and Chemotaxis;Flagellar motility in Prokaryota;Flagellum;Flagellar biosynthesis protein FliR;Flagellar biosynthesis protein FliR	2	1	1	2	0.602338	1	1	1
SEED;Motility and Chemotaxis;Flagellar motility in Prokaryota;Flagellum;Flagellar hook-associated protein FliD;Flagellar hook-associated protein FliD	2	1	1	2	0.602338	1	1	1
SEED;Motility and Chemotaxis;Flagellar motility in Prokaryota;Flagellum;Flagellar biosynthesis protein FliS;Flagellar biosynthesis protein FliS	2	1	1	2	0.602338	1	1	1
SEED;Motility and Chemotaxis;Flagellar motility in Prokaryota;Flagellum;Flagellar biosynthesis protein FlhB;Flagellar biosynthesis protein FlhB	2	1	1	2	0.602338	1	1	1
SEED;Motility and Chemotaxis;Flagellar motility in Prokaryota;Flagellum;RNA polymerase sigma factor for flagellar operon;RNA polymerase sigma factor for flagellar operon	2	1	1	2	0.602338	1	1	1
SEED;Motility and Chemotaxis;Flagellar motility in Prokaryota;Flagellum;Flagellar motor rotation protein MotA;Flagellar motor rotation protein MotA	2	1	1	2	0.602338	1	1	1
SEED;Motility and Chemotaxis;Flagellar motility in Prokaryota;Flagellum;Flagellar biosynthesis protein FliL;Flagellar biosynthesis protein FliL	2	1	1	2	0.602338	1	1	1
SEED;Motility and Chemotaxis;Bacterial_Chemotaxis;Methyl-accepting chemotaxis protein III (ribose and galactose chemoreceptor protein);Methyl-accepting chemotaxis protein III (ribose and galactose chemoreceptor protein)	2	1	1	1	0.602338	1	0.577795	1
SEED;Motility and Chemotaxis;Bacterial_Chemotaxis;Flagellar motor switch protein FliM;Flagellar motor switch protein FliM	2	1	1	2	0.602338	1	1	1
SEED;Motility and Chemotaxis;Bacterial_Chemotaxis;Flagellar motor switch protein FliN;Flagellar motor switch protein FliN	2	1	1	2	0.602338	1	1	1
SEED;Amino Acids and Derivatives;Branched-chain amino acids;Leucine_Biosynthesis;3-isopropylmalate dehydratase large subunit (EC 4.2.1.33);3-isopropylmalate dehydratase large subunit (EC 4.2.1.33)	2	1	1	2	0.602338	1	1	1
SEED;Amino Acids and Derivatives;Lysine, threonine, methionine, and cysteine.1;Methionine_Biosynthesis;Transcriptional activator MetR;Transcriptional activator MetR	2	1	1	1	0.602338	1	0.577795	1
SEED;Amino Acids and Derivatives;Glutamine, glutamate, aspartate, asparagine; ammonia assimilation;Glutamine,_Glutamate,_Aspartate_and_Asparagine_Biosynthesis;L-asparaginase (EC 3.5.1.1);L-asparaginase (EC 3.5.1.1)	2	1	1	1	0.602338	1	0.577795	1
SEED;Clustering-based subsystems;NusA-TFII_Cluster;Translation initiation factor 2;Translation initiation factor 2	2	1	1	1	0.602338	1	0.577795	1
SEED;Clustering-based subsystems;Type III secretion system related;Type III secretion system related	2	1	1	2	0.602338	1	1	1
SEED;Clustering-based subsystems;Type III secretion system related;CBSS-343509.6.peg.2644;CBSS-343509.6.peg.2644	2	1	1	2	0.602338	1	1	1
SEED;Cell Wall and Capsule;Capsular and extracellular polysacchrides;Sialic_Acid_Metabolism;Sialic acid utilization regulator, RpiR family;Sialic acid utilization regulator, RpiR family	2	1	1	1	0.602338	1	0.577795	1
SEED;Cell Wall and Capsule;Gram-Negative cell wall components;Lipid_A_modifications;Lipid A acylation protein PagP, palmitoyltransferase;Lipid A acylation protein PagP, palmitoyltransferase	2	1	1	2	0.602338	1	1	1
SEED;Cell Wall and Capsule;UDP-N-acetylmuramate_from_Fructose-6-phosphate_Biosynthesis;N-acetylmuramic acid 6-phosphate etherase (EC 4.2.-.-);N-acetylmuramic acid 6-phosphate etherase (EC 4.2.-.-)	2	1	1	1	0.602338	1	0.577795	1
SEED;DNA Metabolism;DNA repair;DNA_repair,_bacterial;DNA repair protein RecN;DNA repair protein RecN	2	1	1	1	0.602338	1	0.577795	1
SEED;DNA Metabolism;DNA replication;DNA-replication;DNA repair protein RecN;DNA repair protein RecN	2	1	1	1	0.602338	1	0.577795	1
SEED;Phages, Prophages, Transposable elements;Bacteriophage structural proteins;Phage_capsid_proteins;Phage head completion protein;Phage head completion protein	2	1	1	2	0.602338	1	1	1
SEED;Membrane Transport;Potassium_homeostasis;Glutathione-regulated potassium-efflux system protein KefC;Glutathione-regulated potassium-efflux system protein KefC	2	1	1	1	0.602338	1	0.577795	1
SEED;Respiration;Formate_hydrogenase;Formate hydrogenlyase transcriptional activator;Formate hydrogenlyase transcriptional activator	2	0	1	1	0.602338	1	0.577795	1
SEED;Regulation and Cell signaling;Orphan_regulatory_proteins;Two-component system response regulator QseB;Two-component system response regulator QseB	2	1	1	2	0.602338	1	1	1
SEED;Carbohydrates;Fermentation;Acetoin,_butanediol_metabolism;Acetoin,_butanediol_metabolism	8	6	7	7	0.616924	1	0.439058	1
SEED;Carbohydrates;Monosaccharides;D-ribose_utilization;Ribose ABC transport system, periplasmic ribose-binding protein RbsB (TC 3.A.1.2.1);Ribose ABC transport system, periplasmic ribose-binding protein RbsB (TC 3.A.1.2.1)	1	2	3	3	0.628087	1	0.642247	1
SEED;Amino Acids and Derivatives;Branched-chain amino acids;Branched-Chain_Amino_Acid_Biosynthesis;Leucine-responsive regulatory protein, regulator for leucine (or lrp) regulon and high-affinity branched-chain amino acid transport system;Leucine-responsive regulatory protein, regulator for leucine (or lrp) regulon and high-affinity branched-chain amino acid transport system	1	2	3	3	0.628087	1	0.642247	1
SEED;Amino Acids and Derivatives;Glutamine, glutamate, aspartate, asparagine; ammonia assimilation;Glutamine,_Glutamate,_Aspartate_and_Asparagine_Biosynthesis;Leucine-responsive regulatory protein, regulator for leucine (or lrp) regulon and high-affinity branched-chain amino acid transport system;Leucine-responsive regulatory protein, regulator for leucine (or lrp) regulon and high-affinity branc…	1	2	3	3	0.628087	1	0.642247	1
SEED;Virulence;Resistance to antibiotics and toxic compounds;Multidrug_Resistance,_Tripartite_Systems_Found_in_Gram_Negative_Bacteria;Outer membrane component of tripartite multidrug resistance system;Outer membrane component of tripartite multidrug resistance system	3	2	2	2	0.669966	1	0.656312	1
SEED;Stress Response;Oxidative stress;Oxidative_stress;Paraquat-inducible protein B;Paraquat-inducible protein B	3	2	2	2	0.669966	1	0.656312	1
SEED;Stress Response;Oxidative stress;Glutathione:_Non-redox_reactions;Glutathione S-transferase (EC 2.5.1.18);Glutathione S-transferase (EC 2.5.1.18)	3	2	2	3	0.669966	1	0.702896	1
SEED;Stress Response;Universal_stress_protein_family;Universal stress protein G;Universal stress protein G	3	2	2	3	0.669966	1	0.702896	1
SEED;Protein Metabolism;Protein biosynthesis;Translation_initiation_factors_eukaryotic_and_archaeal;Translation_initiation_factors_eukaryotic_and_archaeal	3	2	2	2	0.669966	1	0.656312	1
SEED;Amino Acids and Derivatives;Branched-chain amino acids;Leucine_Biosynthesis;2-isopropylmalate synthase (EC 2.3.3.13);2-isopropylmalate synthase (EC 2.3.3.13)	3	2	2	2	0.669966	1	0.656312	1
SEED;Nitrogen Metabolism;Ammonia_assimilation;Nitrogen regulatory protein P-II;Nitrogen regulatory protein P-II	3	2	2	2	0.669966	1	0.656312	1
SEED;Nitrogen Metabolism;Nitrate_and_nitrite_ammonification;Nitrate/nitrite transporter;Nitrate/nitrite transporter	3	2	2	2	0.669966	1	0.656312	1
SEED;Cell Wall and Capsule;Capsular and extracellular polysacchrides;Colanic_acid_biosynthesis;Polysaccharide export lipoprotein Wza;Polysaccharide export lipoprotein Wza	3	2	2	3	0.669966	1	0.702896	1
SEED;Cell Wall and Capsule;Capsular and extracellular polysacchrides;Colanic_acid_biosynthesis;Tyrosine-protein kinase Wzc (EC 2.7.10.2);Tyrosine-protein kinase Wzc (EC 2.7.10.2)	3	2	2	3	0.669966	1	0.702896	1
SEED;Cell Wall and Capsule;Gram-Negative cell wall components;KDO2-Lipid_A_biosynthesis;Lipid A biosynthesis lauroyl acyltransferase (EC 2.3.1.-);Lipid A biosynthesis lauroyl acyltransferase (EC 2.3.1.-)	3	2	2	2	0.669966	1	0.656312	1
SEED;Cell Wall and Capsule;Gram-Negative cell wall components;LOS_core_oligosaccharide_biosynthesis;ADP-heptose--lipooligosaccharide heptosyltransferase II (EC 2.4.1.-);ADP-heptose--lipooligosaccharide heptosyltransferase II (EC 2.4.1.-)	3	1	2	1	0.669966	1	0.317816	1
SEED;Metabolism of Aromatic Compounds;Peripheral pathways for catabolism of aromatic compounds;Phenylpropanoid_compound_degradation;Phenylpropanoid_compound_degradation	3	1	2	2	0.669966	1	0.656312	1
SEED;Cofactors, Vitamins, Prosthetic Groups, Pigments;Tetrapyrroles;Experimental_tye;Experimental_tye	15	13	14	17	0.710034	1	0.597192	1
SEED;Protein Metabolism;Protein degradation;Protein_degradation;Protein_degradation	4	3	3	3	0.712397	1	0.466604	1
SEED;Cell Wall and Capsule;UDP-N-acetylmuramate_from_Fructose-6-phosphate_Biosynthesis;UDP-N-acetylmuramate_from_Fructose-6-phosphate_Biosynthesis	4	3	3	4	0.712397	1	0.72913	1
SEED;Carbohydrates;Di- and oligosaccharides;Fructooligosaccharides(FOS)_and_Raffinose_Utilization;Fructooligosaccharides(FOS)_and_Raffinose_Utilization	5	3	4	5	0.742212	1	0.751943	1
SEED;Carbohydrates;Central carbohydrate metabolism;TCA_Cycle;TCA_Cycle	7	6	6	7	0.782356	1	0.596704	1
SEED;Clustering-based subsystems;Bacterial_RNA-metabolizing_Zn-dependent_hydrolases;Bacterial_RNA-metabolizing_Zn-dependent_hydrolases	7	6	6	7	0.782356	1	0.596704	1
SEED;Virulence;Type III, Type IV, Type VI, ESAT secretion systems;Type_IV_pilus;Type_IV_pilus	8	7	8	10	0.807666	1	1	1
SEED;Carbohydrates;Monosaccharides;2-Ketogluconate_Utilization;2-ketogluconate utilization repressor PtxS;2-ketogluconate utilization repressor PtxS	1	1	1	1	1	1	1	1
SEED;Carbohydrates;Monosaccharides;2-Ketogluconate_Utilization;Epimerase KguE;Epimerase KguE	1	1	1	1	1	1	1	1
SEED;Carbohydrates;Monosaccharides;2-Ketogluconate_Utilization;2-ketogluconate kinase (EC 2.7.1.13);2-ketogluconate kinase (EC 2.7.1.13)	1	1	1	1	1	1	1	1
SEED;Carbohydrates;Monosaccharides;2-Ketogluconate_Utilization;2-ketogluconate transporter;2-ketogluconate transporter	1	1	1	1	1	1	1	1
SEED;Carbohydrates;Monosaccharides;2-Ketogluconate_Utilization;2-ketogluconate 6-phosphate reductase (EC 1.1.1.43);2-ketogluconate 6-phosphate reductase (EC 1.1.1.43)	1	1	1	1	1	1	1	1
SEED;Carbohydrates;Monosaccharides;Mannose_Metabolism;Mannose-6-phosphate isomerase (EC 5.3.1.8);Mannose-6-phosphate isomerase (EC 5.3.1.8)	1	1	2	1	1	1	1	1
SEED;Carbohydrates;Monosaccharides;Mannose_Metabolism;PTS system, mannose-specific IIA component (EC 2.7.1.69);PTS system, mannose-specific IIA component (EC 2.7.1.69)	0	0	1	0	1	1	1	1
SEED;Carbohydrates;Monosaccharides;Mannose_Metabolism;PTS system, mannose-specific IIC component (EC 2.7.1.69);PTS system, mannose-specific IIC component (EC 2.7.1.69)	1	1	1	1	1	1	1	1
SEED;Carbohydrates;Monosaccharides;Mannose_Metabolism;GDP-mannose mannosyl hydrolase (EC 3.6.1.-);GDP-mannose mannosyl hydrolase (EC 3.6.1.-)	1	1	1	1	1	1	1	1
SEED;Carbohydrates;Monosaccharides;D-Sorbitol(D-Glucitol)_and_L-Sorbose_Utilization;PTS system, glucitol/sorbitol-specific IIB component and second of two IIC components (EC 2.7.1.69);PTS system, glucitol/sorbitol-specific IIB component and second of two IIC components (EC 2.7.1.69)	0	0	1	1	1	1	1	1
SEED;Carbohydrates;Monosaccharides;D-Sorbitol(D-Glucitol)_and_L-Sorbose_Utilization;PTS system, glucitol/sorbitol-specific IIA component (EC 2.7.1.69);PTS system, glucitol/sorbitol-specific IIA component (EC 2.7.1.69)	0	0	1	1	1	1	1	1
SEED;Carbohydrates;Monosaccharides;D-Sorbitol(D-Glucitol)_and_L-Sorbose_Utilization;Sorbitol-6-phosphate 2-dehydrogenase (EC 1.1.1.140);Sorbitol-6-phosphate 2-dehydrogenase (EC 1.1.1.140)	0	0	1	1	1	1	1	1
SEED;Carbohydrates;Monosaccharides;D-Sorbitol(D-Glucitol)_and_L-Sorbose_Utilization;Glucitol operon activator protein;Glucitol operon activator protein	0	0	1	1	1	1	1	1
SEED;Carbohydrates;Monosaccharides;D-Sorbitol(D-Glucitol)_and_L-Sorbose_Utilization;Glucitol operon GutQ protein;Glucitol operon GutQ protein	1	1	1	1	1	1	1	1
SEED;Carbohydrates;Monosaccharides;D-galactonate_catabolism;Galactonate dehydratase (EC 4.2.1.6);Galactonate dehydratase (EC 4.2.1.6)	1	1	1	1	1	1	1	1
SEED;Carbohydrates;Monosaccharides;D-galactonate_catabolism;D-Galactonate repressor DgoR;D-Galactonate repressor DgoR	1	1	1	1	1	1	1	1
SEED;Carbohydrates;Monosaccharides;Hexose_Phosphate_Uptake_System;Hexose phosphate transport protein UhpT;Hexose phosphate transport protein UhpT	1	1	1	1	1	1	1	1
SEED;Carbohydrates;Monosaccharides;L-ascorbate_utilization_(and_related_gene_clusters);Ascorbate utilization transcriptional regulator UlaR, HTH-type;Ascorbate utilization transcriptional regulator UlaR, HTH-type	1	0	1	1	1	1	1	1
SEED;Carbohydrates;Monosaccharides;L-ascorbate_utilization_(and_related_gene_clusters);3-keto-L-gulonate 6-phosphate decarboxylase;3-keto-L-gulonate 6-phosphate decarboxylase	1	0	1	1	1	1	1	1
SEED;Carbohydrates;Monosaccharides;L-ascorbate_utilization_(and_related_gene_clusters);L-xylulose 5-phosphate 3-epimerase (EC 5.1.3.-);L-xylulose 5-phosphate 3-epimerase (EC 5.1.3.-)	1	0	1	1	1	1	1	1
SEED;Carbohydrates;Monosaccharides;L-ascorbate_utilization_(and_related_gene_clusters);3-keto-L-gulonate 6-phosphate decarboxylase homolog;3-keto-L-gulonate 6-phosphate decarboxylase homolog	0	0	1	1	1	1	1	1
SEED;Carbohydrates;Monosaccharides;L-ascorbate_utilization_(and_related_gene_clusters);L-xylulose 5-phosphate 3-epimerase (EC 5.1.3.-) homolog;L-xylulose 5-phosphate 3-epimerase (EC 5.1.3.-) homolog	0	0	1	1	1	1	1	1
SEED;Carbohydrates;Monosaccharides;L-ascorbate_utilization_(and_related_gene_clusters);3-dehydro-L-gulonate 2-dehydrogenase (EC 1.1.1.130);3-dehydro-L-gulonate 2-dehydrogenase (EC 1.1.1.130)	0	0	1	1	1	1	1	1
SEED;Carbohydrates;Monosaccharides;L-rhamnose_utilization;Rhamnulokinase (EC 2.7.1.5);Rhamnulokinase (EC 2.7.1.5)	1	1	1	1	1	1	1	1
SEED;Carbohydrates;Monosaccharides;L-rhamnose_utilization;Rhamnulose-1-phosphate aldolase (EC 4.1.2.19);Rhamnulose-1-phosphate aldolase (EC 4.1.2.19)	1	1	1	1	1	1	1	1
SEED;Carbohydrates;Monosaccharides;L-rhamnose_utilization;L-rhamnose mutarotase;L-rhamnose mutarotase	1	1	1	1	1	1	1	1
SEED;Carbohydrates;Monosaccharides;L-rhamnose_utilization;L-rhamnose-proton symporter;L-rhamnose-proton symporter	1	0	1	1	1	1	1	1
SEED;Carbohydrates;Monosaccharides;L-rhamnose_utilization;L-rhamnose operon regulatory protein RhaS;L-rhamnose operon regulatory protein RhaS	1	1	1	1	1	1	1	1
SEED;Carbohydrates;Monosaccharides;L-rhamnose_utilization;Rhamnogalacturonide transporter RhiT;Rhamnogalacturonide transporter RhiT	1	1	1	2	1	1	1	1
SEED;Carbohydrates;Monosaccharides;L-rhamnose_utilization;Rhamnogalacturonides degradation protein RhiN;Rhamnogalacturonides degradation protein RhiN	1	1	1	1	1	1	1	1
SEED;Carbohydrates;Monosaccharides;L-rhamnose_utilization;Lactaldehyde reductase (EC 1.1.1.77);Lactaldehyde reductase (EC 1.1.1.77)	0	0	1	0	1	1	1	1
SEED;Carbohydrates;Monosaccharides;L-rhamnose_utilization;Predicted rhamnose oligosaccharide ABC transport system, permease component 2;Predicted rhamnose oligosaccharide ABC transport system, permease component 2	1	1	1	1	1	1	1	1
SEED;Carbohydrates;Monosaccharides;L-Arabinose_utilization;Arabinose operon regulatory protein;Arabinose operon regulatory protein	1	1	1	1	1	1	1	1
SEED;Carbohydrates;Monosaccharides;L-Arabinose_utilization;Ribulokinase (EC 2.7.1.16);Ribulokinase (EC 2.7.1.16)	1	1	1	1	1	1	1	1
SEED;Carbohydrates;Monosaccharides;L-Arabinose_utilization;L-arabinose isomerase (EC 5.3.1.4);L-arabinose isomerase (EC 5.3.1.4)	1	1	1	1	1	1	1	1
SEED;Carbohydrates;Monosaccharides;L-Arabinose_utilization;L-arabinose transport system permease protein (TC 3.A.1.2.2);L-arabinose transport system permease protein (TC 3.A.1.2.2)	1	1	1	1	1	1	1	1
SEED;Carbohydrates;Monosaccharides;L-Arabinose_utilization;Arabinose-proton symporter;Arabinose-proton symporter	2	2	2	2	1	1	1	1
SEED;Carbohydrates;Monosaccharides;L-Arabinose_utilization;Protein AraJ precursor;Protein AraJ precursor	1	1	1	1	1	1	1	1
SEED;Carbohydrates;Monosaccharides;L-Arabinose_utilization;Possible GPH family transporter (TC 2.A.2) for arabinosides;Possible GPH family transporter (TC 2.A.2) for arabinosides	1	1	1	1	1	1	1	1
SEED;Carbohydrates;Monosaccharides;L-Arabinose_utilization;Alpha-L-arabinofuranosidase II precursor (EC 3.2.1.55);Alpha-L-arabinofuranosidase II precursor (EC 3.2.1.55)	1	1	1	1	1	1	1	1
SEED;Carbohydrates;Monosaccharides;D-Galacturonate_and_D-Glucuronate_Utilization;Hexuronate transporter;Hexuronate transporter	2	2	2	2	1	1	1	1
SEED;Carbohydrates;Monosaccharides;D-Galacturonate_and_D-Glucuronate_Utilization;Altronate hydrolase (EC 4.2.1.7);Altronate hydrolase (EC 4.2.1.7)	1	1	1	1	1	1	1	1
SEED;Carbohydrates;Monosaccharides;D-Galacturonate_and_D-Glucuronate_Utilization;Altronate oxidoreductase (EC 1.1.1.58);Altronate oxidoreductase (EC 1.1.1.58)	1	1	1	1	1	1	1	1
SEED;Carbohydrates;Monosaccharides;D-Galacturonate_and_D-Glucuronate_Utilization;Uronate isomerase (EC 5.3.1.12);Uronate isomerase (EC 5.3.1.12)	1	1	1	2	1	1	1	1
SEED;Carbohydrates;Monosaccharides;D-Galacturonate_and_D-Glucuronate_Utilization;Uxu operon transcriptional regulator;Uxu operon transcriptional regulator	1	0	1	1	1	1	1	1
SEED;Carbohydrates;Monosaccharides;D-Galacturonate_and_D-Glucuronate_Utilization;Mannonate dehydratase (EC 4.2.1.8);Mannonate dehydratase (EC 4.2.1.8)	1	1	1	1	1	1	1	1
SEED;Carbohydrates;Monosaccharides;D-Galacturonate_and_D-Glucuronate_Utilization;D-mannonate oxidoreductase (EC 1.1.1.57);D-mannonate oxidoreductase (EC 1.1.1.57)	1	1	1	1	1	1	1	1
SEED;Carbohydrates;Monosaccharides;D-Galacturonate_and_D-Glucuronate_Utilization;2-dehydro-3-deoxygluconate kinase (EC 2.7.1.45);2-dehydro-3-deoxygluconate kinase (EC 2.7.1.45)	1	1	1	1	1	1	1	1
SEED;Carbohydrates;Monosaccharides;D-Galacturonate_and_D-Glucuronate_Utilization;Transcriptional regulator KdgR, KDG operon repressor;Transcriptional regulator KdgR, KDG operon repressor	1	1	1	1	1	1	1	1
SEED;Carbohydrates;Monosaccharides;D-Galacturonate_and_D-Glucuronate_Utilization;2-keto-3-deoxygluconate permease (KDG permease);2-keto-3-deoxygluconate permease (KDG permease)	1	1	1	1	1	1	1	1
SEED;Carbohydrates;Monosaccharides;D-Galacturonate_and_D-Glucuronate_Utilization;Pectin degradation protein KdgF;Pectin degradation protein KdgF	1	1	1	1	1	1	1	1
SEED;Carbohydrates;Monosaccharides;D-Galacturonate_and_D-Glucuronate_Utilization;Gluconokinase (EC 2.7.1.12);Gluconokinase (EC 2.7.1.12)	1	1	1	1	1	1	1	1
SEED;Carbohydrates;Monosaccharides;Xylose_utilization;Xylose isomerase (EC 5.3.1.5);Xylose isomerase (EC 5.3.1.5)	1	1	1	1	1	1	1	1
SEED;Carbohydrates;Monosaccharides;Xylose_utilization;Xylulose kinase (EC 2.7.1.17);Xylulose kinase (EC 2.7.1.17)	1	1	1	1	1	1	1	1
SEED;Carbohydrates;Monosaccharides;Xylose_utilization;Xylose activator XylR (AraC family);Xylose activator XylR (AraC family)	1	1	1	1	1	1	1	1
SEED;Carbohydrates;Monosaccharides;Xylose_utilization;Xylose ABC transporter, periplasmic xylose-binding protein XylF;Xylose ABC transporter, periplasmic xylose-binding protein XylF	1	1	1	1	1	1	1	1
SEED;Carbohydrates;Monosaccharides;Xylose_utilization;D-xylose transport ATP-binding protein XylG;D-xylose transport ATP-binding protein XylG	1	1	1	1	1	1	1	1
SEED;Carbohydrates;Monosaccharides;Xylose_utilization;Xylose ABC transporter, permease protein XylH;Xylose ABC transporter, permease protein XylH	1	1	1	1	1	1	1	1
SEED;Carbohydrates;Monosaccharides;Xylose_utilization;Beta-xylosidase (EC 3.2.1.37);Beta-xylosidase (EC 3.2.1.37)	2	2	2	2	1	1	1	1
SEED;Carbohydrates;Monosaccharides;D-gluconate_and_ketogluconates_metabolism;Gluconate utilization system Gnt-I transcriptional repressor;Gluconate utilization system Gnt-I transcriptional repressor	1	1	1	1	1	1	1	1
SEED;Carbohydrates;Monosaccharides;D-gluconate_and_ketogluconates_metabolism;High-affinity gluconate transporter GntT;High-affinity gluconate transporter GntT	1	1	1	1	1	1	1	1
SEED;Carbohydrates;Monosaccharides;D-gluconate_and_ketogluconates_metabolism;Low-affinity gluconate/H+ symporter GntU;Low-affinity gluconate/H+ symporter GntU	1	1	1	1	1	1	1	1
SEED;Carbohydrates;Monosaccharides;D-Tagatose_and_Galactitol_Utilization;6-phosphofructokinase (EC 2.7.1.11);6-phosphofructokinase (EC 2.7.1.11)	1	1	1	1	1	1	1	1
SEED;Carbohydrates;Monosaccharides;Fructose_utilization;Fructose_utilization	2	2	2	3	1	1	1	1
SEED;Carbohydrates;Monosaccharides;Fructose_utilization;1-phosphofructokinase (EC 2.7.1.56);1-phosphofructokinase (EC 2.7.1.56)	1	1	1	2	1	1	1	1
SEED;Carbohydrates;Monosaccharides;Fructose_utilization;Fructose repressor FruR, LacI family;Fructose repressor FruR, LacI family	1	1	1	1	1	1	1	1
SEED;Carbohydrates;Monosaccharides;D-galactarate,_D-glucarate_and_D-glycerate_catabolism;Sugar diacid utilization regulator SdaR;Sugar diacid utilization regulator SdaR	1	1	1	1	1	1	1	1
SEED;Carbohydrates;Monosaccharides;D-galactarate,_D-glucarate_and_D-glycerate_catabolism;2-dehydro-3-deoxyglucarate aldolase (EC 4.1.2.20);2-dehydro-3-deoxyglucarate aldolase (EC 4.1.2.20)	1	1	1	1	1	1	1	1
SEED;Carbohydrates;Monosaccharides;D-galactarate,_D-glucarate_and_D-glycerate_catabolism;D-galactarate dehydratase (EC 4.2.1.42);D-galactarate dehydratase (EC 4.2.1.42)	1	1	1	1	1	1	1	1
SEED;Carbohydrates;Monosaccharides;D-galactarate,_D-glucarate_and_D-glycerate_catabolism;D-glucarate permease;D-glucarate permease	1	2	2	2	1	1	1	1
SEED;Carbohydrates;Monosaccharides;D-ribose_utilization;Ribokinase (EC 2.7.1.15);Ribokinase (EC 2.7.1.15)	1	1	1	1	1	1	1	1
SEED;Carbohydrates;Monosaccharides;D-ribose_utilization;Ribose ABC transport system, ATP-binding protein RbsA (TC 3.A.1.2.1);Ribose ABC transport system, ATP-binding protein RbsA (TC 3.A.1.2.1)	2	3	3	3	1	1	1	1
SEED;Carbohydrates;Monosaccharides;D-ribose_utilization;Ribose ABC transport system, permease protein RbsC (TC 3.A.1.2.1);Ribose ABC transport system, permease protein RbsC (TC 3.A.1.2.1)	2	3	3	3	1	1	1	1
SEED;Carbohydrates;Monosaccharides;D-ribose_utilization;Ribose ABC transport system, high affinity permease RbsD (TC 3.A.1.2.1);Ribose ABC transport system, high affinity permease RbsD (TC 3.A.1.2.1)	1	1	1	1	1	1	1	1
SEED;Carbohydrates;Monosaccharides;D-ribose_utilization;Ribose operon repressor;Ribose operon repressor	3	2	3	3	1	1	0.702896	1
SEED;Carbohydrates;Monosaccharides;Deoxyribose_and_Deoxynucleoside_Catabolism;Thymidine phosphorylase (EC 2.4.2.4);Thymidine phosphorylase (EC 2.4.2.4)	1	1	1	1	1	1	1	1
SEED;Carbohydrates;Monosaccharides;Deoxyribose_and_Deoxynucleoside_Catabolism;Phosphopentomutase (EC 5.4.2.7);Phosphopentomutase (EC 5.4.2.7)	1	1	1	1	1	1	1	1
SEED;Carbohydrates;Monosaccharides;Deoxyribose_and_Deoxynucleoside_Catabolism;Deoxyribose-phosphate aldolase (EC 4.1.2.4);Deoxyribose-phosphate aldolase (EC 4.1.2.4)	1	1	1	1	1	1	1	1
SEED;Carbohydrates;Monosaccharides;Deoxyribose_and_Deoxynucleoside_Catabolism;Nucleoside permease NupC;Nucleoside permease NupC	2	2	3	2	1	1	1	1
SEED;Carbohydrates;Monosaccharides;Deoxyribose_and_Deoxynucleoside_Catabolism;Putative deoxyribonuclease YjjV;Putative deoxyribonuclease YjjV	1	1	1	1	1	1	1	1
SEED;Carbohydrates;Monosaccharides;Deoxyribose_and_Deoxynucleoside_Catabolism;Deoxyribose operon repressor, DeoR family;Deoxyribose operon repressor, DeoR family	1	1	1	1	1	1	1	1
SEED;Carbohydrates;Monosaccharides;D-allose_utilization;D-allose kinase (EC 2.7.1.55);D-allose kinase (EC 2.7.1.55)	0	0	1	0	1	1	1	1
SEED;Carbohydrates;Monosaccharides;D-allose_utilization;D-allose-6-phosphate isomerase (EC 5.3.1.-);D-allose-6-phosphate isomerase (EC 5.3.1.-)	0	0	1	0	1	1	1	1
SEED;Carbohydrates;Monosaccharides;D-allose_utilization;D-allulose-6-phosphate 3-epimerase (EC 5.1.3.-), row_id 1016;D-allulose-6-phosphate 3-epimerase (EC 5.1.3.-), row_id 1016	0	0	1	0	1	1	1	1
SEED;Carbohydrates;Monosaccharides;D-allose_utilization;D-allose ABC transporter, substrate-binding component;D-allose ABC transporter, substrate-binding component	0	0	1	0	1	1	1	1
SEED;Carbohydrates;Monosaccharides;D-allose_utilization;D-allose ABC transporter, ATPase component;D-allose ABC transporter, ATPase component	0	0	1	0	1	1	1	1
SEED;Carbohydrates;Monosaccharides;D-allose_utilization;D-allose ABC transporter, permease component;D-allose ABC transporter, permease component	0	0	1	0	1	1	1	1
SEED;Carbohydrates;Monosaccharides;D-allose_utilization;Transcriptional regulator of D-allose utilization, RpiR family;Transcriptional regulator of D-allose utilization, RpiR family	0	0	1	0	1	1	1	1
SEED;Carbohydrates;Fermentation;Acetoin,_butanediol_metabolism;Acetolactate synthase large subunit (EC 2.2.1.6);Acetolactate synthase large subunit (EC 2.2.1.6)	3	3	3	3	1	1	0.702896	1
SEED;Carbohydrates;Fermentation;Acetoin,_butanediol_metabolism;Acetolactate synthase small subunit (EC 2.2.1.6);Acetolactate synthase small subunit (EC 2.2.1.6)	3	3	3	3	1	1	0.702896	1
SEED;Carbohydrates;Fermentation;Acetoin,_butanediol_metabolism;Acetolactate synthase, catabolic (EC 2.2.1.6);Acetolactate synthase, catabolic (EC 2.2.1.6)	1	0	1	1	1	1	1	1
SEED;Carbohydrates;Fermentation;Fermentations:_Lactate;D-lactate dehydrogenase (EC 1.1.1.28);D-lactate dehydrogenase (EC 1.1.1.28)	1	1	1	1	1	1	1	1
SEED;Carbohydrates;Fermentation;Fermentations:_Mixed_acid;Formate efflux transporter (TC 2.A.44 family);Formate efflux transporter (TC 2.A.44 family)	1	1	1	1	1	1	1	1
SEED;Carbohydrates;Fermentation;Fermentations:_Mixed_acid;Sugar/maltose fermentation stimulation protein homolog;Sugar/maltose fermentation stimulation protein homolog	1	1	1	1	1	1	1	1
SEED;Carbohydrates;Sugar alcohols;Ethanolamine_utilization;Ethanolamine_utilization	2	2	2	2	1	1	1	1
SEED;Carbohydrates;Sugar alcohols;Ethanolamine_utilization;Phosphate acetyltransferase (EC 2.3.1.8);Phosphate acetyltransferase (EC 2.3.1.8)	1	1	1	1	1	1	1	1
SEED;Carbohydrates;Sugar alcohols;Ethanolamine_utilization;Acetate kinase (EC 2.7.2.1);Acetate kinase (EC 2.7.2.1)	1	1	1	1	1	1	1	1
SEED;Carbohydrates;Sugar alcohols;Inositol_catabolism;Inosose dehydratase (EC 4.2.1.44);Inosose dehydratase (EC 4.2.1.44)	0	0	1	1	1	1	1	1
SEED;Carbohydrates;Sugar alcohols;Inositol_catabolism;uncharacterized domain;uncharacterized domain	0	0	1	1	1	1	1	1
SEED;Carbohydrates;Sugar alcohols;Inositol_catabolism;Methylmalonate-semialdehyde dehydrogenase [inositol] (EC 1.2.1.27);Methylmalonate-semialdehyde dehydrogenase [inositol] (EC 1.2.1.27)	0	0	1	1	1	1	1	1
SEED;Carbohydrates;Sugar alcohols;Inositol_catabolism;Predicted transcriptional regulator of the myo-inositol catabolic operon;Predicted transcriptional regulator of the myo-inositol catabolic operon	0	0	1	1	1	1	1	1
SEED;Carbohydrates;Sugar alcohols;Glycerol_fermenation_to_1,3-propanediol;Glycerol_fermenation_to_1,3-propanediol	1	1	1	1	1	1	1	1
SEED;Carbohydrates;Sugar alcohols;Glycerol_fermenation_to_1,3-propanediol;Glycerol uptake facilitator protein;Glycerol uptake facilitator protein	1	1	1	1	1	1	1	1
SEED;Carbohydrates;Sugar alcohols;Mannitol_Utilization;Phosphocarrier protein of PTS system;Phosphocarrier protein of PTS system	1	1	1	1	1	1	1	1
SEED;Carbohydrates;Sugar alcohols;Glycerol_and_Glycerol-3-phosphate_Uptake_and_Utilization;Glycerophosphoryl diester phosphodiesterase, periplasmic (EC 3.1.4.46);Glycerophosphoryl diester phosphodiesterase, periplasmic (EC 3.1.4.46)	1	1	1	1	1	1	1	1
SEED;Carbohydrates;Sugar alcohols;Glycerol_and_Glycerol-3-phosphate_Uptake_and_Utilization;Glycerol-3-phosphate transporter;Glycerol-3-phosphate transporter	1	1	1	1	1	1	1	1
SEED;Carbohydrates;Sugar alcohols;Glycerol_and_Glycerol-3-phosphate_Uptake_and_Utilization;Glycerol uptake facilitator protein;Glycerol uptake facilitator protein	1	1	1	1	1	1	1	1
SEED;Carbohydrates;Sugar alcohols;Glycerol_and_Glycerol-3-phosphate_Uptake_and_Utilization;Glycerophosphoryl diester phosphodiesterase (EC 3.1.4.46);Glycerophosphoryl diester phosphodiesterase (EC 3.1.4.46)	1	1	1	1	1	1	1	1
SEED;Carbohydrates;Sugar alcohols;Glycerol_and_Glycerol-3-phosphate_Uptake_and_Utilization;GlpG protein (membrane protein of glp regulon);GlpG protein (membrane protein of glp regulon)	1	1	1	1	1	1	1	1
SEED;Carbohydrates;Sugar alcohols;Glycerol_and_Glycerol-3-phosphate_Uptake_and_Utilization;Glycerol-3-phosphate ABC transporter, periplasmic glycerol-3-phosphate-binding protein (TC 3.A.1.1.3);Glycerol-3-phosphate ABC transporter, periplasmic glycerol-3-phosphate-binding protein (TC 3.A.1.1.3)	1	1	1	1	1	1	1	1
SEED;Carbohydrates;Organic acids;Malonate_decarboxylase;Malonate decarboxylase alpha subunit;Malonate decarboxylase alpha subunit	1	1	1	1	1	1	1	1
SEED;Carbohydrates;Organic acids;Malonate_decarboxylase;Malonate decarboxylase beta subunit;Malonate decarboxylase beta subunit	1	1	1	1	1	1	1	1
SEED;Carbohydrates;Organic acids;Malonate_decarboxylase;Malonate decarboxylase gamma subunit;Malonate decarboxylase gamma subunit	1	1	1	1	1	1	1	1
SEED;Carbohydrates;Organic acids;Malonate_decarboxylase;Malonate decarboxylase delta subunit;Malonate decarboxylase delta subunit	1	1	1	1	1	1	1	1
SEED;Carbohydrates;Organic acids;Malonate_decarboxylase;Malonate utilization transcriptional regulator;Malonate utilization transcriptional regulator	1	1	1	1	1	1	1	1
SEED;Carbohydrates;Organic acids;Lactate_utilization;L-lactate dehydrogenase (EC 1.1.2.3);L-lactate dehydrogenase (EC 1.1.2.3)	1	1	1	1	1	1	1	1
SEED;Carbohydrates;Organic acids;Lactate_utilization;L-lactate permease;L-lactate permease	1	1	1	1	1	1	1	1
SEED;Carbohydrates;Organic acids;Lactate_utilization;Lactate-responsive regulator LldR in Enterobacteria, GntR family;Lactate-responsive regulator LldR in Enterobacteria, GntR family	1	1	1	1	1	1	1	1
SEED;Carbohydrates;Organic acids;Lactate_utilization;Lactate-responsive regulator LldR in Firmicutes, GntR family;Lactate-responsive regulator LldR in Firmicutes, GntR family	1	1	1	1	1	1	1	1
SEED;Carbohydrates;Central carbohydrate metabolism;Pentose_phosphate_pathway;Glucose-6-phosphate 1-dehydrogenase (EC 1.1.1.49);Glucose-6-phosphate 1-dehydrogenase (EC 1.1.1.49)	1	1	1	1	1	1	1	1
SEED;Carbohydrates;Central carbohydrate metabolism;Pentose_phosphate_pathway;6-phosphogluconolactonase (EC 3.1.1.31);6-phosphogluconolactonase (EC 3.1.1.31)	1	1	1	1	1	1	1	1
SEED;Carbohydrates;Central carbohydrate metabolism;Pentose_phosphate_pathway;6-phosphogluconate dehydrogenase, decarboxylating (EC 1.1.1.44);6-phosphogluconate dehydrogenase, decarboxylating (EC 1.1.1.44)	1	1	1	1	1	1	1	1
SEED;Carbohydrates;Central carbohydrate metabolism;Pentose_phosphate_pathway;Ribose 5-phosphate isomerase A (EC 5.3.1.6);Ribose 5-phosphate isomerase A (EC 5.3.1.6)	1	1	1	1	1	1	1	1
SEED;Carbohydrates;Central carbohydrate metabolism;Pentose_phosphate_pathway;Ribulose-phosphate 3-epimerase (EC 5.1.3.1);Ribulose-phosphate 3-epimerase (EC 5.1.3.1)	1	1	2	1	1	1	1	1
SEED;Carbohydrates;Central carbohydrate metabolism;Pentose_phosphate_pathway;Transketolase, N-terminal section (EC 2.2.1.1);Transketolase, N-terminal section (EC 2.2.1.1)	1	2	2	2	1	1	1	1
SEED;Carbohydrates;Central carbohydrate metabolism;Pentose_phosphate_pathway;Transaldolase (EC 2.2.1.2);Transaldolase (EC 2.2.1.2)	2	2	3	3	1	1	1	1
SEED;Carbohydrates;Central carbohydrate metabolism;Pentose_phosphate_pathway;Ribose-phosphate pyrophosphokinase (EC 2.7.6.1);Ribose-phosphate pyrophosphokinase (EC 2.7.6.1)	1	1	1	1	1	1	1	1
SEED;Carbohydrates;Central carbohydrate metabolism;Pyruvate_metabolism_II:_acetyl-CoA,_acetogenesis_from_pyruvate;Pyruvate dehydrogenase E1 component (EC 1.2.4.1);Pyruvate dehydrogenase E1 component (EC 1.2.4.1)	1	1	1	1	1	1	1	1
SEED;Carbohydrates;Central carbohydrate metabolism;Pyruvate_metabolism_II:_acetyl-CoA,_acetogenesis_from_pyruvate;Dihydrolipoamide acetyltransferase component of pyruvate dehydrogenase complex (EC 2.3.1.12);Dihydrolipoamide acetyltransferase component of pyruvate dehydrogenase complex (EC 2.3.1.12)	1	1	1	1	1	1	1	1
SEED;Carbohydrates;Central carbohydrate metabolism;Pyruvate_metabolism_II:_acetyl-CoA,_acetogenesis_from_pyruvate;Pyruvate oxidase [ubiquinone, cytochrome] (EC 1.2.2.2);Pyruvate oxidase [ubiquinone, cytochrome] (EC 1.2.2.2)	1	1	1	1	1	1	1	1
SEED;Carbohydrates;Central carbohydrate metabolism;Pyruvate_metabolism_II:_acetyl-CoA,_acetogenesis_from_pyruvate;Acylphosphate phosphohydrolase (EC 3.6.1.7), putative;Acylphosphate phosphohydrolase (EC 3.6.1.7), putative	1	1	1	1	1	1	1	1
SEED;Carbohydrates;Central carbohydrate metabolism;Pyruvate_metabolism_II:_acetyl-CoA,_acetogenesis_from_pyruvate;Acetate permease ActP (cation/acetate symporter);Acetate permease ActP (cation/acetate symporter)	1	1	1	1	1	1	1	1
SEED;Carbohydrates;Central carbohydrate metabolism;Pyruvate_metabolism_II:_acetyl-CoA,_acetogenesis_from_pyruvate;Putative membrane protein, clustering with ActP;Putative membrane protein, clustering with ActP	1	1	1	1	1	1	1	1
SEED;Carbohydrates;Central carbohydrate metabolism;Pyruvate_metabolism_II:_acetyl-CoA,_acetogenesis_from_pyruvate;Acetyl-coenzyme A synthetase (EC 6.2.1.1);Acetyl-coenzyme A synthetase (EC 6.2.1.1)	1	1	1	1	1	1	1	1
SEED;Carbohydrates;Central carbohydrate metabolism;Pyruvate_metabolism_II:_acetyl-CoA,_acetogenesis_from_pyruvate;Protein acetyltransferase;Protein acetyltransferase	1	1	1	1	1	1	1	1
SEED;Carbohydrates;Central carbohydrate metabolism;Methylglyoxal_Metabolism;Methylglyoxal_Metabolism	3	3	4	3	1	1	0.702896	1
SEED;Carbohydrates;Central carbohydrate metabolism;Methylglyoxal_Metabolism;Methylglyoxal synthase (EC 4.2.3.3);Methylglyoxal synthase (EC 4.2.3.3)	1	1	1	1	1	1	1	1
SEED;Carbohydrates;Central carbohydrate metabolism;Methylglyoxal_Metabolism;Lactoylglutathione lyase (EC 4.4.1.5);Lactoylglutathione lyase (EC 4.4.1.5)	1	1	2	1	1	1	1	1
SEED;Carbohydrates;Central carbohydrate metabolism;Methylglyoxal_Metabolism;Hydroxyacylglutathione hydrolase (EC 3.1.2.6);Hydroxyacylglutathione hydrolase (EC 3.1.2.6)	1	1	1	1	1	1	1	1
SEED;Carbohydrates;Central carbohydrate metabolism;Pyruvate_metabolism_I:_anaplerotic_reactions,_PEP;Pyruvate kinase (EC 2.7.1.40);Pyruvate kinase (EC 2.7.1.40)	2	2	2	2	1	1	1	1
SEED;Carbohydrates;Central carbohydrate metabolism;Pyruvate_metabolism_I:_anaplerotic_reactions,_PEP;Phosphoenolpyruvate carboxylase (EC 4.1.1.31);Phosphoenolpyruvate carboxylase (EC 4.1.1.31)	1	1	1	1	1	1	1	1
SEED;Carbohydrates;Central carbohydrate metabolism;Pyruvate_metabolism_I:_anaplerotic_reactions,_PEP;Phosphoenolpyruvate carboxykinase [ATP] (EC 4.1.1.49);Phosphoenolpyruvate carboxykinase [ATP] (EC 4.1.1.49)	1	1	1	1	1	1	1	1
SEED;Carbohydrates;Central carbohydrate metabolism;Pyruvate_metabolism_I:_anaplerotic_reactions,_PEP;NAD-dependent malic enzyme (EC 1.1.1.38);NAD-dependent malic enzyme (EC 1.1.1.38)	1	1	1	1	1	1	1	1
SEED;Carbohydrates;Central carbohydrate metabolism;Pyruvate_metabolism_I:_anaplerotic_reactions,_PEP;NADP-dependent malic enzyme (EC 1.1.1.40);NADP-dependent malic enzyme (EC 1.1.1.40)	1	1	1	1	1	1	1	1
SEED;Carbohydrates;Central carbohydrate metabolism;Pyruvate_metabolism_I:_anaplerotic_reactions,_PEP;Positive regulator of Tartrate dehydrogenase/decarboxylase/D-malic enzyme;Positive regulator of Tartrate dehydrogenase/decarboxylase/D-malic enzyme	0	1	1	1	1	1	1	1
SEED;Carbohydrates;Central carbohydrate metabolism;Pyruvate_metabolism_I:_anaplerotic_reactions,_PEP;Malate Na(+) symporter;Malate Na(+) symporter	1	0	1	1	1	1	1	1
SEED;Carbohydrates;Central carbohydrate metabolism;Pyruvate_metabolism_I:_anaplerotic_reactions,_PEP;Aerobic C4-dicarboxylate transporter for fumarate, L-malate, D-malate, succunate;Aerobic C4-dicarboxylate transporter for fumarate, L-malate, D-malate, succunate	1	1	1	1	1	1	1	1
SEED;Carbohydrates;Central carbohydrate metabolism;Entner-Doudoroff_Pathway;Glucokinase (EC 2.7.1.2);Glucokinase (EC 2.7.1.2)	1	1	1	1	1	1	1	1
SEED;Carbohydrates;Central carbohydrate metabolism;Entner-Doudoroff_Pathway;Phosphogluconate dehydratase (EC 4.2.1.12);Phosphogluconate dehydratase (EC 4.2.1.12)	1	1	1	1	1	1	1	1
SEED;Carbohydrates;Central carbohydrate metabolism;Entner-Doudoroff_Pathway;NAD-dependent glyceraldehyde-3-phosphate dehydrogenase (EC 1.2.1.12);NAD-dependent glyceraldehyde-3-phosphate dehydrogenase (EC 1.2.1.12)	2	2	3	3	1	1	1	1
SEED;Carbohydrates;Central carbohydrate metabolism;Entner-Doudoroff_Pathway;Phosphoglycerate kinase (EC 2.7.2.3);Phosphoglycerate kinase (EC 2.7.2.3)	1	1	1	1	1	1	1	1
SEED;Carbohydrates;Central carbohydrate metabolism;Entner-Doudoroff_Pathway;Phosphoglycerate mutase (EC 5.4.2.1);Phosphoglycerate mutase (EC 5.4.2.1)	1	1	1	2	1	1	1	1
SEED;Carbohydrates;Central carbohydrate metabolism;Entner-Doudoroff_Pathway;Enolase (EC 4.2.1.11);Enolase (EC 4.2.1.11)	1	1	1	2	1	1	1	1
SEED;Carbohydrates;Central carbohydrate metabolism;Entner-Doudoroff_Pathway;Gluconolactonase (EC 3.1.1.17);Gluconolactonase (EC 3.1.1.17)	0	0	1	1	1	1	1	1
SEED;Carbohydrates;Central carbohydrate metabolism;Dihydroxyacetone_kinases;Dihydroxyacetone_kinases	1	1	1	1	1	1	1	1
SEED;Carbohydrates;Central carbohydrate metabolism;Dihydroxyacetone_kinases;Dihydroxyacetone kinase, ATP-dependent (EC 2.7.1.29);Dihydroxyacetone kinase, ATP-dependent (EC 2.7.1.29)	1	1	1	1	1	1	1	1
SEED;Carbohydrates;Central carbohydrate metabolism;Pyruvate:ferredoxin_oxidoreductase;Pyruvate:ferredoxin_oxidoreductase	1	1	1	1	1	1	1	1
SEED;Carbohydrates;Central carbohydrate metabolism;Pyruvate:ferredoxin_oxidoreductase;Pyruvate-flavodoxin oxidoreductase (EC 1.2.7.-);Pyruvate-flavodoxin oxidoreductase (EC 1.2.7.-)	1	1	1	1	1	1	1	1
SEED;Carbohydrates;Central carbohydrate metabolism;Glycolysis_and_Gluconeogenesis,_including_Archaeal_enzymes;Glucose-6-phosphate isomerase, archaeal (EC 5.3.1.9);Glucose-6-phosphate isomerase, archaeal (EC 5.3.1.9)	0	0	1	0	1	1	1	1
SEED;Carbohydrates;Central carbohydrate metabolism;Glycolysis_and_Gluconeogenesis,_including_Archaeal_enzymes;6-phosphofructokinase class II (EC 2.7.1.11);6-phosphofructokinase class II (EC 2.7.1.11)	1	1	1	1	1	1	1	1
SEED;Carbohydrates;Central carbohydrate metabolism;Glycolate,_glyoxylate_interconversions;Glycolate,_glyoxylate_interconversions	0	1	1	1	1	1	1	1
SEED;Carbohydrates;Central carbohydrate metabolism;Glycolate,_glyoxylate_interconversions;Transcriptional regulator, LysR family, in glycolate utilization operon;Transcriptional regulator, LysR family, in glycolate utilization operon	0	1	1	1	1	1	1	1
SEED;Carbohydrates;Central carbohydrate metabolism;Pyruvate_Alanine_Serine_Interconversions;Alanine racemase, biosynthetic (EC 5.1.1.1);Alanine racemase, biosynthetic (EC 5.1.1.1)	1	1	1	1	1	1	1	1
SEED;Carbohydrates;Central carbohydrate metabolism;Pyruvate_Alanine_Serine_Interconversions;Alanine racemase, catabolic (EC 5.1.1.1);Alanine racemase, catabolic (EC 5.1.1.1)	1	1	1	1	1	1	1	1
SEED;Carbohydrates;Central carbohydrate metabolism;Pyruvate_Alanine_Serine_Interconversions;D-amino acid dehydrogenase small subunit (EC 1.4.99.1);D-amino acid dehydrogenase small subunit (EC 1.4.99.1)	1	1	1	1	1	1	1	1
SEED;Carbohydrates;Central carbohydrate metabolism;Pyruvate_Alanine_Serine_Interconversions;D-serine/D-alanine/glycine transporter;D-serine/D-alanine/glycine transporter	1	1	1	1	1	1	1	1
SEED;Carbohydrates;Central carbohydrate metabolism;TCA_Cycle;2-oxoglutarate dehydrogenase E1 component (EC 1.2.4.2);2-oxoglutarate dehydrogenase E1 component (EC 1.2.4.2)	1	1	1	2	1	1	1	1
SEED;Carbohydrates;Central carbohydrate metabolism;TCA_Cycle;Fumarate hydratase class II (EC 4.2.1.2);Fumarate hydratase class II (EC 4.2.1.2)	1	1	1	1	1	1	1	1
SEED;Carbohydrates;Central carbohydrate metabolism;TCA_Cycle;Malate:quinone oxidoreductase (EC 1.1.99.16);Malate:quinone oxidoreductase (EC 1.1.99.16)	1	1	1	1	1	1	1	1
SEED;Carbohydrates;Central carbohydrate metabolism;TCA_Cycle;Dihydrolipoamide succinyltransferase component (E2) of 2-oxoglutarate dehydrogenase complex (EC 2.3.1.61);Dihydrolipoamide succinyltransferase component (E2) of 2-oxoglutarate dehydrogenase complex (EC 2.3.1.61)	1	1	1	1	1	1	1	1
SEED;Carbohydrates;Central carbohydrate metabolism;TCA_Cycle;Isocitrate dehydrogenase [NADP] (EC 1.1.1.42);Isocitrate dehydrogenase [NADP] (EC 1.1.1.42)	1	1	1	1	1	1	1	1
SEED;Carbohydrates;Central carbohydrate metabolism;TCA_Cycle;Transcriptional regulator of succinyl CoA synthetase operon;Transcriptional regulator of succinyl CoA synthetase operon	1	1	1	1	1	1	1	1
SEED;Carbohydrates;CO2 fixation;Carboxysome;Carbonic anhydrase (EC 4.2.1.1);Carbonic anhydrase (EC 4.2.1.1)	3	2	3	2	1	1	0.656312	1
SEED;Carbohydrates;CO2 fixation;Photorespiration_(oxidative_C2_cycle);Phosphoglycolate phosphatase (EC 3.1.3.18);Phosphoglycolate phosphatase (EC 3.1.3.18)	1	1	1	1	1	1	1	1
SEED;Carbohydrates;CO2 fixation;Photorespiration_(oxidative_C2_cycle);Catalase (EC 1.11.1.6);Catalase (EC 1.11.1.6)	1	1	2	1	1	1	1	1
SEED;Carbohydrates;CO2 fixation;Photorespiration_(oxidative_C2_cycle);2-oxoglutarate/malate translocator;2-oxoglutarate/malate translocator	1	0	1	1	1	1	1	1
SEED;Carbohydrates;CO2 fixation;Photorespiration_(oxidative_C2_cycle);Glycine cleavage system H protein;Glycine cleavage system H protein	1	1	1	1	1	1	1	1
SEED;Carbohydrates;CO2 fixation;Photorespiration_(oxidative_C2_cycle);Aminomethyltransferase (glycine cleavage system T protein) (EC 2.1.2.10);Aminomethyltransferase (glycine cleavage system T protein) (EC 2.1.2.10)	1	1	1	1	1	1	1	1
SEED;Carbohydrates;CO2 fixation;Photorespiration_(oxidative_C2_cycle);Glycine dehydrogenase [decarboxylating] (glycine cleavage system P protein) (EC 1.4.4.2);Glycine dehydrogenase [decarboxylating] (glycine cleavage system P protein) (EC 1.4.4.2)	1	1	1	1	1	1	1	1
SEED;Carbohydrates;CO2 fixation;Calvin-Benson_cycle;Fructose-bisphosphate aldolase class I (EC 4.1.2.13);Fructose-bisphosphate aldolase class I (EC 4.1.2.13)	1	1	1	1	1	1	1	1
SEED;Carbohydrates;CO2 fixation;Calvin-Benson_cycle;Fructose-bisphosphate aldolase class II (EC 4.1.2.13);Fructose-bisphosphate aldolase class II (EC 4.1.2.13)	1	2	2	2	1	1	1	1
SEED;Carbohydrates;CO2 fixation;Calvin-Benson_cycle;Fructose-1,6-bisphosphatase, type I (EC 3.1.3.11);Fructose-1,6-bisphosphatase, type I (EC 3.1.3.11)	1	1	2	1	1	1	1	1
SEED;Carbohydrates;CO2 fixation;Calvin-Benson_cycle;Phosphoribulokinase (EC 2.7.1.19) homolog, function unknown;Phosphoribulokinase (EC 2.7.1.19) homolog, function unknown	1	1	1	1	1	1	1	1
SEED;Carbohydrates;Di- and oligosaccharides;Lactose_utilization;Transcriptional repressor of the lac operon;Transcriptional repressor of the lac operon	0	1	1	2	1	1	0.511635	1
SEED;Carbohydrates;Di- and oligosaccharides;Lactose_utilization;Beta-galactosidase (EC 3.2.1.23);Beta-galactosidase (EC 3.2.1.23)	1	2	2	3	1	1	0.642247	1
SEED;Carbohydrates;Di- and oligosaccharides;Lactose_utilization;Lactose permease;Lactose permease	0	0	0	1	1	1	1	1
SEED;Carbohydrates;Di- and oligosaccharides;Trehalose_Biosynthesis;Alpha,alpha-trehalose-phosphate synthase [UDP-forming] (EC 2.4.1.15);Alpha,alpha-trehalose-phosphate synthase [UDP-forming] (EC 2.4.1.15)	1	1	1	1	1	1	1	1
SEED;Carbohydrates;Di- and oligosaccharides;Trehalose_Biosynthesis;Trehalose-6-phosphate phosphatase (EC 3.1.3.12);Trehalose-6-phosphate phosphatase (EC 3.1.3.12)	1	1	1	1	1	1	1	1
SEED;Carbohydrates;Di- and oligosaccharides;Trehalose_Biosynthesis;Malto-oligosyltrehalose trehalohydrolase (EC 3.2.1.141);Malto-oligosyltrehalose trehalohydrolase (EC 3.2.1.141)	1	1	1	1	1	1	1	1
SEED;Carbohydrates;Di- and oligosaccharides;Trehalose_Biosynthesis;1,4-alpha-glucan (glycogen) branching enzyme, GH-13-type (EC 2.4.1.18);1,4-alpha-glucan (glycogen) branching enzyme, GH-13-type (EC 2.4.1.18)	1	1	1	1	1	1	1	1
SEED;Carbohydrates;Di- and oligosaccharides;Trehalose_Uptake_and_Utilization;Trehalose operon transcriptional repressor;Trehalose operon transcriptional repressor	1	1	1	1	1	1	1	1
SEED;Carbohydrates;Di- and oligosaccharides;Trehalose_Uptake_and_Utilization;Trehalose-6-phosphate hydrolase (EC 3.2.1.93);Trehalose-6-phosphate hydrolase (EC 3.2.1.93)	1	1	1	1	1	1	1	1
SEED;Carbohydrates;Di- and oligosaccharides;Trehalose_Uptake_and_Utilization;Cytoplasmic trehalase (EC 3.2.1.28);Cytoplasmic trehalase (EC 3.2.1.28)	1	1	1	1	1	1	1	1
SEED;Carbohydrates;Di- and oligosaccharides;Trehalose_Uptake_and_Utilization;Maltose-6'-phosphate glucosidase (EC 3.2.1.122);Maltose-6'-phosphate glucosidase (EC 3.2.1.122)	1	1	2	2	1	1	1	1
SEED;Carbohydrates;Di- and oligosaccharides;Trehalose_Uptake_and_Utilization;Beta-phosphoglucomutase (EC 5.4.2.6);Beta-phosphoglucomutase (EC 5.4.2.6)	1	0	1	1	1	1	1	1
SEED;Carbohydrates;Di- and oligosaccharides;Trehalose_Uptake_and_Utilization;PTS system, glucose-specific IIA component (EC 2.7.1.69);PTS system, glucose-specific IIA component (EC 2.7.1.69)	1	1	1	1	1	1	1	1
SEED;Carbohydrates;Di- and oligosaccharides;Sucrose_utilization;Sucrose-6-phosphate hydrolase (EC 3.2.1.26);Sucrose-6-phosphate hydrolase (EC 3.2.1.26)	1	0	1	1	1	1	1	1
SEED;Carbohydrates;Di- and oligosaccharides;Sucrose_utilization;Sucrose operon repressor ScrR, LacI family;Sucrose operon repressor ScrR, LacI family	1	0	1	1	1	1	1	1
SEED;Carbohydrates;Di- and oligosaccharides;Sucrose_utilization;Sucrose specific transcriptional regulator CscR, LacI family;Sucrose specific transcriptional regulator CscR, LacI family	0	0	1	1	1	1	1	1
SEED;Carbohydrates;Di- and oligosaccharides;Sucrose_utilization;Sucrose permease, major facilitator superfamily;Sucrose permease, major facilitator superfamily	0	0	1	0	1	1	1	1
SEED;Carbohydrates;Di- and oligosaccharides;Beta-Glucoside_Metabolism;Beta-glucosidase (EC 3.2.1.21);Beta-glucosidase (EC 3.2.1.21)	2	2	3	2	1	1	1	1
SEED;Carbohydrates;Di- and oligosaccharides;Beta-Glucoside_Metabolism;PTS system, cellobiose-specific IIB component (EC 2.7.1.69);PTS system, cellobiose-specific IIB component (EC 2.7.1.69)	2	2	3	2	1	1	1	1
SEED;Carbohydrates;Di- and oligosaccharides;Beta-Glucoside_Metabolism;Cellobiose phosphotransferase system YdjC-like protein;Cellobiose phosphotransferase system YdjC-like protein	1	1	1	1	1	1	1	1
SEED;Carbohydrates;Di- and oligosaccharides;Beta-Glucoside_Metabolism;Negative transcriptional regulator of cel operon;Negative transcriptional regulator of cel operon	1	1	1	1	1	1	1	1
SEED;Carbohydrates;Di- and oligosaccharides;Beta-Glucoside_Metabolism;PTS system, arbutin-, cellobiose-, and salicin-specific IIBC component (EC 2.7.1.69);PTS system, arbutin-, cellobiose-, and salicin-specific IIBC component (EC 2.7.1.69)	1	1	1	1	1	1	1	1
SEED;Carbohydrates;Di- and oligosaccharides;Beta-Glucoside_Metabolism;Periplasmic beta-glucosidase (EC 3.2.1.21);Periplasmic beta-glucosidase (EC 3.2.1.21)	1	1	1	1	1	1	1	1
SEED;Carbohydrates;Di- and oligosaccharides;Maltose_and_Maltodextrin_Utilization;Maltose/maltodextrin ABC transporter, permease protein MalF;Maltose/maltodextrin ABC transporter, permease protein MalF	1	2	2	2	1	1	1	1
SEED;Carbohydrates;Di- and oligosaccharides;Maltose_and_Maltodextrin_Utilization;Maltose/maltodextrin ABC transporter, permease protein MalG;Maltose/maltodextrin ABC transporter, permease protein MalG	1	2	2	2	1	1	1	1
SEED;Carbohydrates;Di- and oligosaccharides;Maltose_and_Maltodextrin_Utilization;Multiple sugar ABC transporter, ATP-binding protein;Multiple sugar ABC transporter, ATP-binding protein	1	0	1	1	1	1	1	1
SEED;Carbohydrates;Di- and oligosaccharides;Maltose_and_Maltodextrin_Utilization;Maltose operon periplasmic protein MalM;Maltose operon periplasmic protein MalM	1	1	1	1	1	1	1	1
SEED;Carbohydrates;Di- and oligosaccharides;Maltose_and_Maltodextrin_Utilization;Transcriptional activator of maltose regulon, MalT;Transcriptional activator of maltose regulon, MalT	1	1	1	1	1	1	1	1
SEED;Carbohydrates;Di- and oligosaccharides;Maltose_and_Maltodextrin_Utilization;Maltose operon transcriptional repressor MalR, LacI family;Maltose operon transcriptional repressor MalR, LacI family	1	1	1	1	1	1	1	1
SEED;Carbohydrates;Di- and oligosaccharides;Maltose_and_Maltodextrin_Utilization;Alpha-glucosidase (EC 3.2.1.20);Alpha-glucosidase (EC 3.2.1.20)	1	1	1	1	1	1	1	1
SEED;Carbohydrates;Di- and oligosaccharides;Maltose_and_Maltodextrin_Utilization;Periplasmic alpha-amylase (EC 3.2.1.1);Periplasmic alpha-amylase (EC 3.2.1.1)	1	1	1	1	1	1	1	1
SEED;Carbohydrates;Di- and oligosaccharides;Maltose_and_Maltodextrin_Utilization;Transcriptional regulator YcjW, LacI family, possibly involved in maltodextrin utilization pathway;Transcriptional regulator YcjW, LacI family, possibly involved in maltodextrin utilization pathway	1	0	1	1	1	1	1	1
SEED;Carbohydrates;Di- and oligosaccharides;Maltose_and_Maltodextrin_Utilization;Putative oxidoreductase YcjS (EC 1.-.-.-), NADH-binding;Putative oxidoreductase YcjS (EC 1.-.-.-), NADH-binding	1	0	1	1	1	1	1	1
SEED;Carbohydrates;Di- and oligosaccharides;Maltose_and_Maltodextrin_Utilization;Sugar phosphate isomerases/epimerases family protein YcjR;Sugar phosphate isomerases/epimerases family protein YcjR	1	0	1	1	1	1	1	1
SEED;Carbohydrates;Di- and oligosaccharides;Maltose_and_Maltodextrin_Utilization;Putative sucrose phosphorylase (EC 2.4.1.7);Putative sucrose phosphorylase (EC 2.4.1.7)	1	0	1	1	1	1	1	1
SEED;Carbohydrates;Di- and oligosaccharides;Maltose_and_Maltodextrin_Utilization;Inner membrane ABC transporter permease protein YcjP;Inner membrane ABC transporter permease protein YcjP	1	0	1	1	1	1	1	1
SEED;Carbohydrates;Di- and oligosaccharides;Maltose_and_Maltodextrin_Utilization;Inner membrane ABC transporter permease protein YcjO;Inner membrane ABC transporter permease protein YcjO	1	0	1	1	1	1	1	1
SEED;Carbohydrates;Di- and oligosaccharides;Maltose_and_Maltodextrin_Utilization;ABC-type sugar transport system, periplasmic binding protein YcjN;ABC-type sugar transport system, periplasmic binding protein YcjN	1	0	1	1	1	1	1	1
SEED;Carbohydrates;Di- and oligosaccharides;Maltose_and_Maltodextrin_Utilization;Maltose regulon modulator;Maltose regulon modulator	1	1	1	1	1	1	1	1
SEED;Carbohydrates;Di- and oligosaccharides;Maltose_and_Maltodextrin_Utilization;Mlc, transcriptional repressor of MalT (the transcriptional activator of maltose regulon) and manXYZ operon;Mlc, transcriptional repressor of MalT (the transcriptional activator of maltose regulon) and manXYZ operon	1	1	1	1	1	1	1	1
SEED;Carbohydrates;Di- and oligosaccharides;Maltose_and_Maltodextrin_Utilization;Maltose O-acetyltransferase (EC 2.3.1.79);Maltose O-acetyltransferase (EC 2.3.1.79)	1	0	1	1	1	1	1	1
SEED;Carbohydrates;Di- and oligosaccharides;Maltose_and_Maltodextrin_Utilization;Cytoplasmic alpha-amylase (EC 3.2.1.1);Cytoplasmic alpha-amylase (EC 3.2.1.1)	1	1	1	1	1	1	1	1
SEED;Carbohydrates;Di- and oligosaccharides;Maltose_and_Maltodextrin_Utilization;Aldose 1-epimerase (EC 5.1.3.3);Aldose 1-epimerase (EC 5.1.3.3)	1	1	1	1	1	1	1	1
SEED;Carbohydrates;Di- and oligosaccharides;Fructooligosaccharides(FOS)_and_Raffinose_Utilization;Multiple sugar ABC transporter, ATP-binding protein;Multiple sugar ABC transporter, ATP-binding protein	1	0	1	1	1	1	1	1
SEED;Carbohydrates;Di- and oligosaccharides;Fructooligosaccharides(FOS)_and_Raffinose_Utilization;Raffinose operon transcriptional regulatory protein RafR;Raffinose operon transcriptional regulatory protein RafR	1	1	1	1	1	1	1	1
SEED;Carbohydrates;Di- and oligosaccharides;Fructooligosaccharides(FOS)_and_Raffinose_Utilization;Raffinose permease;Raffinose permease	2	2	2	2	1	1	1	1
SEED;Carbohydrates;Di- and oligosaccharides;Fructooligosaccharides(FOS)_and_Raffinose_Utilization;Lactose permease;Lactose permease	0	0	0	1	1	1	1	1
SEED;Carbohydrates;Di- and oligosaccharides;Lactose_and_Galactose_Uptake_and_Utilization;Lactose permease;Lactose permease	0	0	0	1	1	1	1	1
SEED;Carbohydrates;Di- and oligosaccharides;Lactose_and_Galactose_Uptake_and_Utilization;Transcriptional repressor of the lac operon;Transcriptional repressor of the lac operon	0	1	1	2	1	1	0.511635	1
SEED;Carbohydrates;Di- and oligosaccharides;Lactose_and_Galactose_Uptake_and_Utilization;Galactose permease;Galactose permease	0	1	1	1	1	1	1	1
SEED;Carbohydrates;Di- and oligosaccharides;Lactose_and_Galactose_Uptake_and_Utilization;Galactokinase (EC 2.7.1.6);Galactokinase (EC 2.7.1.6)	1	1	1	1	1	1	1	1
SEED;Carbohydrates;Di- and oligosaccharides;Lactose_and_Galactose_Uptake_and_Utilization;Galactose-1-phosphate uridylyltransferase (EC 2.7.7.10);Galactose-1-phosphate uridylyltransferase (EC 2.7.7.10)	1	1	1	1	1	1	1	1
SEED;Carbohydrates;Di- and oligosaccharides;Lactose_and_Galactose_Uptake_and_Utilization;Galactose operon repressor, GalR-LacI family of transcriptional regulators;Galactose operon repressor, GalR-LacI family of transcriptional regulators	1	1	1	1	1	1	1	1
SEED;Carbohydrates;Di- and oligosaccharides;Lactose_and_Galactose_Uptake_and_Utilization;Galactose/methyl galactoside ABC transport system, ATP-binding protein MglA (EC 3.6.3.17);Galactose/methyl galactoside ABC transport system, ATP-binding protein MglA (EC 3.6.3.17)	1	1	1	1	1	1	1	1
SEED;Carbohydrates;Di- and oligosaccharides;Lactose_and_Galactose_Uptake_and_Utilization;Galactose/methyl galactoside ABC transport system, permease protein MglC (TC 3.A.1.2.3);Galactose/methyl galactoside ABC transport system, permease protein MglC (TC 3.A.1.2.3)	1	1	1	1	1	1	1	1
SEED;Carbohydrates;Di- and oligosaccharides;Lactose_and_Galactose_Uptake_and_Utilization;Galactose/methyl galactoside ABC transport system, D-galactose-binding periplasmic protein MglB (TC 3.A.1.2.3);Galactose/methyl galactoside ABC transport system, D-galactose-binding periplasmic protein MglB (TC 3.A.1.2.3)	1	1	1	1	1	1	1	1
SEED;Carbohydrates;Di- and oligosaccharides;Lactose_and_Galactose_Uptake_and_Utilization;Mgl repressor and galactose ultrainduction factor GalS, HTH-type transcriptional regulator;Mgl repressor and galactose ultrainduction factor GalS, HTH-type transcriptional regulator	1	1	1	1	1	1	1	1
SEED;Carbohydrates;One-carbon Metabolism;One-carbon_metabolism_by_tetrahydropterines;One-carbon_metabolism_by_tetrahydropterines	3	3	3	3	1	1	0.702896	1
SEED;Carbohydrates;One-carbon Metabolism;One-carbon_metabolism_by_tetrahydropterines;Formyltetrahydrofolate deformylase (EC 3.5.1.10);Formyltetrahydrofolate deformylase (EC 3.5.1.10)	1	1	1	1	1	1	1	1
SEED;Carbohydrates;One-carbon Metabolism;One-carbon_metabolism_by_tetrahydropterines;5,10-methylenetetrahydrofolate reductase (EC 1.5.1.20);5,10-methylenetetrahydrofolate reductase (EC 1.5.1.20)	1	1	1	1	1	1	1	1
SEED;Carbohydrates;One-carbon Metabolism;One-carbon_metabolism_by_tetrahydropterines;5-formyltetrahydrofolate cyclo-ligase (EC 6.3.3.2);5-formyltetrahydrofolate cyclo-ligase (EC 6.3.3.2)	1	1	1	1	1	1	1	1
SEED;Carbohydrates;One-carbon Metabolism;Serine-glyoxylate_cycle;Malate dehydrogenase (EC 1.1.1.37);Malate dehydrogenase (EC 1.1.1.37)	1	1	1	1	1	1	1	1
SEED;Carbohydrates;One-carbon Metabolism;Serine-glyoxylate_cycle;Phosphoglyceromutase;Phosphoglyceromutase	2	2	2	2	1	1	1	1
SEED;Carbohydrates;One-carbon Metabolism;Serine-glyoxylate_cycle;Isocitrate lyase (EC 4.1.3.1);Isocitrate lyase (EC 4.1.3.1)	1	1	1	1	1	1	1	1
SEED;Carbohydrates;One-carbon Metabolism;Serine-glyoxylate_cycle;Fumarate hydratase class I, aerobic (EC 4.2.1.2);Fumarate hydratase class I, aerobic (EC 4.2.1.2)	1	1	1	1	1	1	1	1
SEED;Carbohydrates;One-carbon Metabolism;Serine-glyoxylate_cycle;Succinyl-CoA ligase [ADP-forming] alpha chain (EC 6.2.1.5);Succinyl-CoA ligase [ADP-forming] alpha chain (EC 6.2.1.5)	1	1	2	1	1	1	1	1
SEED;Carbohydrates;One-carbon Metabolism;Serine-glyoxylate_cycle;Succinyl-CoA ligase [ADP-forming] beta chain (EC 6.2.1.5);Succinyl-CoA ligase [ADP-forming] beta chain (EC 6.2.1.5)	1	1	1	1	1	1	1	1
SEED;Carbohydrates;One-carbon Metabolism;Serine-glyoxylate_cycle;Citrate synthase (si) (EC 2.3.3.1);Citrate synthase (si) (EC 2.3.3.1)	1	1	1	1	1	1	1	1
SEED;Carbohydrates;One-carbon Metabolism;Serine-glyoxylate_cycle;Aconitate hydratase (EC 4.2.1.3);Aconitate hydratase (EC 4.2.1.3)	1	1	1	1	1	1	1	1
SEED;Carbohydrates;One-carbon Metabolism;Serine-glyoxylate_cycle;Fumarate hydratase class I, anaerobic (EC 4.2.1.2);Fumarate hydratase class I, anaerobic (EC 4.2.1.2)	1	0	1	1	1	1	1	1
SEED;Carbohydrates;Polysaccharides;Glycogen_metabolism;Glucose-1-phosphate adenylyltransferase (EC 2.7.7.27);Glucose-1-phosphate adenylyltransferase (EC 2.7.7.27)	1	1	1	1	1	1	1	1
SEED;Carbohydrates;Polysaccharides;Glycogen_metabolism;Glycogen synthase, ADP-glucose transglucosylase (EC 2.4.1.21);Glycogen synthase, ADP-glucose transglucosylase (EC 2.4.1.21)	1	1	1	1	1	1	1	1
SEED;Carbohydrates;Polysaccharides;Glycogen_metabolism;Glycogen phosphorylase (EC 2.4.1.1);Glycogen phosphorylase (EC 2.4.1.1)	1	1	1	1	1	1	1	1
SEED;Carbohydrates;Polysaccharides;Glycogen_metabolism;Maltodextrin phosphorylase (EC 2.4.1.1);Maltodextrin phosphorylase (EC 2.4.1.1)	1	1	1	1	1	1	1	1
SEED;Carbohydrates;Polysaccharides;Glycogen_metabolism;4-alpha-glucanotransferase (amylomaltase) (EC 2.4.1.25);4-alpha-glucanotransferase (amylomaltase) (EC 2.4.1.25)	1	1	1	1	1	1	1	1
SEED;Carbohydrates;Aminosugars;Chitin_and_N-acetylglucosamine_utilization;N-acetylglucosamine-6P-responsive transcriptional repressor NagC, ROK family;N-acetylglucosamine-6P-responsive transcriptional repressor NagC, ROK family	1	1	2	1	1	1	1	1
SEED;Carbohydrates;Aminosugars;Chitin_and_N-acetylglucosamine_utilization;Chitinase (EC 3.2.1.14);Chitinase (EC 3.2.1.14)	2	1	2	2	1	1	1	1
SEED;Carbohydrates;Aminosugars;Chitin_and_N-acetylglucosamine_utilization;N-acetylglucosamine-regulated outer membrane porin;N-acetylglucosamine-regulated outer membrane porin	1	1	1	1	1	1	1	1
SEED;Carbohydrates;Aminosugars;Chitin_and_N-acetylglucosamine_utilization;Phosphatase NagD predicted to act in N-acetylglucosamine utilization subsystem;Phosphatase NagD predicted to act in N-acetylglucosamine utilization subsystem	1	1	1	1	1	1	1	1
SEED;Carbohydrates;Aminosugars;Chitin_and_N-acetylglucosamine_utilization;PTS system, chitobiose-specific IIB component (EC 2.7.1.69);PTS system, chitobiose-specific IIB component (EC 2.7.1.69)	1	1	1	1	1	1	1	1
SEED;Carbohydrates;Aminosugars;Chitin_and_N-acetylglucosamine_utilization;PTS system, chitobiose-specific IIC component (EC 2.7.1.69);PTS system, chitobiose-specific IIC component (EC 2.7.1.69)	1	1	1	1	1	1	1	1
SEED;Carbohydrates;Aminosugars;Chitin_and_N-acetylglucosamine_utilization;PTS system, chitobiose-specific IIA component (EC 2.7.1.69);PTS system, chitobiose-specific IIA component (EC 2.7.1.69)	1	1	2	1	1	1	1	1
SEED;Carbohydrates;Aminosugars;Chitin_and_N-acetylglucosamine_utilization;Chitobiose-specific regulator ChbR, AraC family;Chitobiose-specific regulator ChbR, AraC family	1	1	1	1	1	1	1	1
SEED;Carbohydrates;Aminosugars;Chitin_and_N-acetylglucosamine_utilization;Chitobiose-specific 6-phospho-beta-glucosidase ChbF (EC 3.2.1.86);Chitobiose-specific 6-phospho-beta-glucosidase ChbF (EC 3.2.1.86)	1	1	1	1	1	1	1	1
SEED;Carbohydrates;Aminosugars;N-Acetyl-Galactosamine_and_Galactosamine_Utilization;PTS system, N-acetylgalactosamine-specific IIB component (EC 2.7.1.69);PTS system, N-acetylgalactosamine-specific IIB component (EC 2.7.1.69)	1	0	1	1	1	1	1	1
SEED;Carbohydrates;Aminosugars;N-Acetyl-Galactosamine_and_Galactosamine_Utilization;PTS system, N-acetylgalactosamine-specific IIC component (EC 2.7.1.69);PTS system, N-acetylgalactosamine-specific IIC component (EC 2.7.1.69)	1	0	1	1	1	1	1	1
SEED;Carbohydrates;Aminosugars;N-Acetyl-Galactosamine_and_Galactosamine_Utilization;PTS system, N-acetylgalactosamine-specific IID component (EC 2.7.1.69);PTS system, N-acetylgalactosamine-specific IID component (EC 2.7.1.69)	1	0	1	1	1	1	1	1
SEED;Carbohydrates;Aminosugars;N-Acetyl-Galactosamine_and_Galactosamine_Utilization;PTS system, N-acetylgalactosamine- and galactosamine-specific IIA component (EC 2.7.1.69);PTS system, N-acetylgalactosamine- and galactosamine-specific IIA component (EC 2.7.1.69)	1	0	1	1	1	1	1	1
SEED;Carbohydrates;Aminosugars;N-Acetyl-Galactosamine_and_Galactosamine_Utilization;Transcriptional repressor of aga operon;Transcriptional repressor of aga operon	0	0	1	0	1	1	1	1
SEED;Carbohydrates;Glycoside hydrolases;Glycoside hydrolases	3	2	3	3	1	1	0.702896	1
SEED;Carbohydrates;Glycoside hydrolases;Predicted_carbohydrate_hydrolases;Predicted_carbohydrate_hydrolases	3	2	3	3	1	1	0.702896	1
SEED;Carbohydrates;Glycoside hydrolases;Predicted_carbohydrate_hydrolases;COG1649 predicted glycoside hydrolase;COG1649 predicted glycoside hydrolase	1	1	1	1	1	1	1	1
SEED;Carbohydrates;Glycoside hydrolases;Predicted_carbohydrate_hydrolases;Polysaccharide deacetylase;Polysaccharide deacetylase	2	1	2	2	1	1	1	1
SEED;Cofactors, Vitamins, Prosthetic Groups, Pigments;Quinone cofactors;Menaquinone_and_Phylloquinone_Biosynthesis;Menaquinone-specific isochorismate synthase (EC 5.4.4.2);Menaquinone-specific isochorismate synthase (EC 5.4.4.2)	1	1	1	1	1	1	1	1
SEED;Cofactors, Vitamins, Prosthetic Groups, Pigments;Quinone cofactors;Menaquinone_and_Phylloquinone_Biosynthesis;2-succinyl-5-enolpyruvyl-6-hydroxy-3-cyclohexene-1-carboxylic-acid synthase (EC 2.2.1.9);2-succinyl-5-enolpyruvyl-6-hydroxy-3-cyclohexene-1-carboxylic-acid synthase (EC 2.2.1.9)	1	1	1	1	1	1	1	1
SEED;Cofactors, Vitamins, Prosthetic Groups, Pigments;Quinone cofactors;Menaquinone_and_Phylloquinone_Biosynthesis;2-succinyl-6-hydroxy-2,4-cyclohexadiene-1-carboxylate synthase (EC 4.2.99.20);2-succinyl-6-hydroxy-2,4-cyclohexadiene-1-carboxylate synthase (EC 4.2.99.20)	1	1	1	1	1	1	1	1
SEED;Cofactors, Vitamins, Prosthetic Groups, Pigments;Quinone cofactors;Menaquinone_and_Phylloquinone_Biosynthesis;O-succinylbenzoate-CoA synthase (EC 4.2.1.-);O-succinylbenzoate-CoA synthase (EC 4.2.1.-)	1	1	1	1	1	1	1	1
SEED;Cofactors, Vitamins, Prosthetic Groups, Pigments;Quinone cofactors;Menaquinone_and_Phylloquinone_Biosynthesis;O-succinylbenzoic acid--CoA ligase (EC 6.2.1.26);O-succinylbenzoic acid--CoA ligase (EC 6.2.1.26)	1	1	1	1	1	1	1	1
SEED;Cofactors, Vitamins, Prosthetic Groups, Pigments;Quinone cofactors;Menaquinone_and_Phylloquinone_Biosynthesis;Naphthoate synthase (EC 4.1.3.36);Naphthoate synthase (EC 4.1.3.36)	1	1	1	1	1	1	1	1
SEED;Cofactors, Vitamins, Prosthetic Groups, Pigments;Quinone cofactors;Menaquinone_and_Phylloquinone_Biosynthesis;1,4-dihydroxy-2-naphthoate octaprenyltransferase (EC 2.5.1.-);1,4-dihydroxy-2-naphthoate octaprenyltransferase (EC 2.5.1.-)	1	1	1	1	1	1	1	1
SEED;Cofactors, Vitamins, Prosthetic Groups, Pigments;Quinone cofactors;Menaquinone_Biosynthesis_via_Futalosine;Menaquinone_Biosynthesis_via_Futalosine	1	1	1	1	1	1	1	1
SEED;Cofactors, Vitamins, Prosthetic Groups, Pigments;Quinone cofactors;Menaquinone_Biosynthesis_via_Futalosine;Protein YigP (COG3165) clustered with ubiquinone biosynthetic genes;Protein YigP (COG3165) clustered with ubiquinone biosynthetic genes	1	1	1	1	1	1	1	1
SEED;Cofactors, Vitamins, Prosthetic Groups, Pigments;Quinone cofactors;Ubiquinone_Biosynthesis;Chorismate--pyruvate lyase (EC 4.1.3.40);Chorismate--pyruvate lyase (EC 4.1.3.40)	1	1	1	1	1	1	1	1
SEED;Cofactors, Vitamins, Prosthetic Groups, Pigments;Quinone cofactors;Ubiquinone_Biosynthesis;4-hydroxybenzoate polyprenyltransferase (EC 2.5.1.-);4-hydroxybenzoate polyprenyltransferase (EC 2.5.1.-)	1	1	1	1	1	1	1	1
SEED;Cofactors, Vitamins, Prosthetic Groups, Pigments;Quinone cofactors;Ubiquinone_Biosynthesis;3-polyprenyl-4-hydroxybenzoate carboxy-lyase (EC 4.1.1.-);3-polyprenyl-4-hydroxybenzoate carboxy-lyase (EC 4.1.1.-)	2	2	3	2	1	1	1	1
SEED;Cofactors, Vitamins, Prosthetic Groups, Pigments;Quinone cofactors;Ubiquinone_Biosynthesis;Ubiquinone biosynthesis monooxygenase UbiB;Ubiquinone biosynthesis monooxygenase UbiB	1	1	1	1	1	1	1	1
SEED;Cofactors, Vitamins, Prosthetic Groups, Pigments;Quinone cofactors;Ubiquinone_Biosynthesis;2-octaprenyl-6-methoxyphenol hydroxylase (EC 1.14.13.-);2-octaprenyl-6-methoxyphenol hydroxylase (EC 1.14.13.-)	1	1	1	1	1	1	1	1
SEED;Cofactors, Vitamins, Prosthetic Groups, Pigments;Quinone cofactors;Ubiquinone_Biosynthesis;2-octaprenyl-3-methyl-6-methoxy-1,4-benzoquinol hydroxylase (EC 1.14.13.-);2-octaprenyl-3-methyl-6-methoxy-1,4-benzoquinol hydroxylase (EC 1.14.13.-)	2	2	2	2	1	1	1	1
SEED;Cofactors, Vitamins, Prosthetic Groups, Pigments;Quinone cofactors;Ubiquinone_Biosynthesis;Protein YigP (COG3165) clustered with ubiquinone biosynthetic genes;Protein YigP (COG3165) clustered with ubiquinone biosynthetic genes	1	1	1	1	1	1	1	1
SEED;Cofactors, Vitamins, Prosthetic Groups, Pigments;Quinone cofactors;Ubiquinone_Biosynthesis;NAD(P)H-flavin reductase (EC 1.5.1.29) (EC 1.16.1.3);NAD(P)H-flavin reductase (EC 1.5.1.29) (EC 1.16.1.3)	1	1	1	1	1	1	1	1
SEED;Cofactors, Vitamins, Prosthetic Groups, Pigments;Riboflavin, FMN, FAD;Riboflavin,_FMN_and_FAD_metabolism;GTP cyclohydrolase II (EC 3.5.4.25);GTP cyclohydrolase II (EC 3.5.4.25)	1	1	1	1	1	1	1	1
SEED;Cofactors, Vitamins, Prosthetic Groups, Pigments;Riboflavin, FMN, FAD;Riboflavin,_FMN_and_FAD_metabolism;3,4-dihydroxy-2-butanone 4-phosphate synthase;3,4-dihydroxy-2-butanone 4-phosphate synthase	1	1	1	1	1	1	1	1
SEED;Cofactors, Vitamins, Prosthetic Groups, Pigments;Riboflavin, FMN, FAD;Riboflavin,_FMN_and_FAD_metabolism;6,7-dimethyl-8-ribityllumazine synthase (EC 2.5.1.9);6,7-dimethyl-8-ribityllumazine synthase (EC 2.5.1.9)	1	1	2	1	1	1	1	1
SEED;Cofactors, Vitamins, Prosthetic Groups, Pigments;Riboflavin, FMN, FAD;Riboflavin,_FMN_and_FAD_metabolism;Riboflavin synthase alpha chain (EC 2.5.1.9);Riboflavin synthase alpha chain (EC 2.5.1.9)	1	1	1	1	1	1	1	1
SEED;Cofactors, Vitamins, Prosthetic Groups, Pigments;Riboflavin, FMN, FAD;Flavodoxin;Flavodoxin	3	3	4	3	1	1	0.702896	1
SEED;Cofactors, Vitamins, Prosthetic Groups, Pigments;Riboflavin, FMN, FAD;Flavodoxin;Flavodoxin;Flavodoxin	3	3	4	3	1	1	0.702896	1
SEED;Cofactors, Vitamins, Prosthetic Groups, Pigments;Riboflavin, FMN, FAD;Flavodoxin;Flavodoxin 2;Flavodoxin 2	0	0	0	1	1	1	1	1
SEED;Cofactors, Vitamins, Prosthetic Groups, Pigments;Riboflavin, FMN, FAD;Flavodoxin;Hypothetical flavoprotein YqcA (clustered with tRNA pseudouridine synthase C);Hypothetical flavoprotein YqcA (clustered with tRNA pseudouridine synthase C)	1	1	1	1	1	1	1	1
SEED;Cofactors, Vitamins, Prosthetic Groups, Pigments;Folate and pterines;Molybdenum_cofactor_biosynthesis;Molybdopterin biosynthesis protein MoeA;Molybdopterin biosynthesis protein MoeA	1	1	1	1	1	1	1	1
SEED;Cofactors, Vitamins, Prosthetic Groups, Pigments;Folate and pterines;Molybdenum_cofactor_biosynthesis;Molybdopterin biosynthesis protein MoeB;Molybdopterin biosynthesis protein MoeB	1	1	1	1	1	1	1	1
SEED;Cofactors, Vitamins, Prosthetic Groups, Pigments;Folate and pterines;Molybdenum_cofactor_biosynthesis;Molybdenum cofactor biosynthesis protein MoaB;Molybdenum cofactor biosynthesis protein MoaB	1	1	1	1	1	1	1	1
SEED;Cofactors, Vitamins, Prosthetic Groups, Pigments;Folate and pterines;Molybdenum_cofactor_biosynthesis;Molybdenum cofactor biosynthesis protein MoaC;Molybdenum cofactor biosynthesis protein MoaC	1	1	1	1	1	1	1	1
SEED;Cofactors, Vitamins, Prosthetic Groups, Pigments;Folate and pterines;Molybdenum_cofactor_biosynthesis;Molybdenum cofactor biosynthesis protein MoaD;Molybdenum cofactor biosynthesis protein MoaD	1	1	1	1	1	1	1	1
SEED;Cofactors, Vitamins, Prosthetic Groups, Pigments;Folate and pterines;Molybdenum_cofactor_biosynthesis;Molybdenum cofactor biosynthesis protein MoaE;Molybdenum cofactor biosynthesis protein MoaE	1	1	1	1	1	1	1	1
SEED;Cofactors, Vitamins, Prosthetic Groups, Pigments;Folate and pterines;Molybdenum_cofactor_biosynthesis;Molybdopterin-guanine dinucleotide biosynthesis protein MobB;Molybdopterin-guanine dinucleotide biosynthesis protein MobB	1	1	1	1	1	1	1	1
SEED;Cofactors, Vitamins, Prosthetic Groups, Pigments;Folate and pterines;Molybdenum_cofactor_biosynthesis;Molybdate-binding domain of ModE;Molybdate-binding domain of ModE	1	1	1	1	1	1	1	1
SEED;Cofactors, Vitamins, Prosthetic Groups, Pigments;Folate and pterines;Molybdenum_cofactor_biosynthesis;Molybdopterin biosynthesis Mog protein, molybdochelatase;Molybdopterin biosynthesis Mog protein, molybdochelatase	1	1	1	1	1	1	1	1
SEED;Cofactors, Vitamins, Prosthetic Groups, Pigments;Folate and pterines;Pterin_biosynthesis;Pterin_biosynthesis	1	1	1	1	1	1	1	1
SEED;Cofactors, Vitamins, Prosthetic Groups, Pigments;Folate and pterines;Pterin_biosynthesis;GTP cyclohydrolase I (EC 3.5.4.16) type 1;GTP cyclohydrolase I (EC 3.5.4.16) type 1	1	1	1	1	1	1	1	1
SEED;Cofactors, Vitamins, Prosthetic Groups, Pigments;Folate and pterines;Folate_Biosynthesis;Dihydroneopterin aldolase (EC 4.1.2.25);Dihydroneopterin aldolase (EC 4.1.2.25)	1	1	1	1	1	1	1	1
SEED;Cofactors, Vitamins, Prosthetic Groups, Pigments;Folate and pterines;Folate_Biosynthesis;Dihydroneopterin triphosphate epimerase;Dihydroneopterin triphosphate epimerase	1	1	1	1	1	1	1	1
SEED;Cofactors, Vitamins, Prosthetic Groups, Pigments;Folate and pterines;Folate_Biosynthesis;2-amino-4-hydroxy-6-hydroxymethyldihydropteridine pyrophosphokinase (EC 2.7.6.3);2-amino-4-hydroxy-6-hydroxymethyldihydropteridine pyrophosphokinase (EC 2.7.6.3)	1	1	1	1	1	1	1	1
SEED;Cofactors, Vitamins, Prosthetic Groups, Pigments;Folate and pterines;Folate_Biosynthesis;Dihydrofolate reductase (EC 1.5.1.3);Dihydrofolate reductase (EC 1.5.1.3)	1	1	1	1	1	1	1	1
SEED;Cofactors, Vitamins, Prosthetic Groups, Pigments;Folate and pterines;Folate_Biosynthesis;FolM Alternative dihydrofolate reductase 1;FolM Alternative dihydrofolate reductase 1	1	1	1	1	1	1	1	1
SEED;Cofactors, Vitamins, Prosthetic Groups, Pigments;Folate and pterines;Folate_Biosynthesis;Thymidylate synthase (EC 2.1.1.45);Thymidylate synthase (EC 2.1.1.45)	1	1	1	1	1	1	1	1
SEED;Cofactors, Vitamins, Prosthetic Groups, Pigments;Folate and pterines;Folate_Biosynthesis;Methionyl-tRNA formyltransferase (EC 2.1.2.9);Methionyl-tRNA formyltransferase (EC 2.1.2.9)	1	1	1	1	1	1	1	1
SEED;Cofactors, Vitamins, Prosthetic Groups, Pigments;Folate and pterines;Folate_Biosynthesis;Thymidine kinase (EC 2.7.1.21);Thymidine kinase (EC 2.7.1.21)	1	1	1	1	1	1	1	1
SEED;Cofactors, Vitamins, Prosthetic Groups, Pigments;Folate and pterines;Folate_Biosynthesis;Nucleoside triphosphate pyrophosphohydrolase MazG;Nucleoside triphosphate pyrophosphohydrolase MazG	1	1	1	1	1	1	1	1
SEED;Cofactors, Vitamins, Prosthetic Groups, Pigments;Folate and pterines;Folate_Biosynthesis;Dihydroneopterin triphosphate pyrophosphohydolase type 2;Dihydroneopterin triphosphate pyrophosphohydolase type 2	1	1	1	1	1	1	1	1
SEED;Cofactors, Vitamins, Prosthetic Groups, Pigments;Folate and pterines;p-Aminobenzoyl-Glutamate_Utilization;Aminobenzoyl-glutamate transport protein;Aminobenzoyl-glutamate transport protein	0	1	1	1	1	1	1	1
SEED;Cofactors, Vitamins, Prosthetic Groups, Pigments;Folate and pterines;p-Aminobenzoyl-Glutamate_Utilization;Catalyzes the cleavage of p-aminobenzoyl-glutamate to p-aminobenzoate and glutamate, subunit A;Catalyzes the cleavage of p-aminobenzoyl-glutamate to p-aminobenzoate and glutamate, subunit A	0	1	1	1	1	1	1	1
SEED;Cofactors, Vitamins, Prosthetic Groups, Pigments;Folate and pterines;p-Aminobenzoyl-Glutamate_Utilization;Catalyzes the cleavage of p-aminobenzoyl-glutamate to p-aminobenzoate and glutamate, subunit B;Catalyzes the cleavage of p-aminobenzoyl-glutamate to p-aminobenzoate and glutamate, subunit B	0	1	1	1	1	1	1	1
SEED;Cofactors, Vitamins, Prosthetic Groups, Pigments;Folate and pterines;p-Aminobenzoyl-Glutamate_Utilization;Regulatory protein (induces abgABT, used to catabolize p-aminobenzoyl-glutamate);Regulatory protein (induces abgABT, used to catabolize p-aminobenzoyl-glutamate)	0	1	1	1	1	1	1	1
SEED;Cofactors, Vitamins, Prosthetic Groups, Pigments;Lipoic acid;Lipoic_acid_metabolism;Proposed lipoate regulatory protein YbeD;Proposed lipoate regulatory protein YbeD	1	1	1	1	1	1	1	1
SEED;Cofactors, Vitamins, Prosthetic Groups, Pigments;Lipoic acid;Lipoic_acid_metabolism;Lipoate synthase;Lipoate synthase	1	1	1	1	1	1	1	1
SEED;Cofactors, Vitamins, Prosthetic Groups, Pigments;Lipoic acid;Lipoic_acid_metabolism;Octanoate-[acyl-carrier-protein]-protein-N-octanoyltransferase;Octanoate-[acyl-carrier-protein]-protein-N-octanoyltransferase	1	1	1	1	1	1	1	1
SEED;Cofactors, Vitamins, Prosthetic Groups, Pigments;Lipoic acid;Lipoic_acid_metabolism;Lipoate-protein ligase A;Lipoate-protein ligase A	2	2	2	2	1	1	1	1
SEED;Cofactors, Vitamins, Prosthetic Groups, Pigments;Tetrapyrroles;Experimental_tye;Glutamyl-tRNA reductase (EC 1.2.1.70);Glutamyl-tRNA reductase (EC 1.2.1.70)	1	1	1	1	1	1	1	1
SEED;Cofactors, Vitamins, Prosthetic Groups, Pigments;Tetrapyrroles;Experimental_tye;Glutamate-1-semialdehyde aminotransferase (EC 5.4.3.8);Glutamate-1-semialdehyde aminotransferase (EC 5.4.3.8)	1	1	1	1	1	1	1	1
SEED;Cofactors, Vitamins, Prosthetic Groups, Pigments;Tetrapyrroles;Experimental_tye;Porphobilinogen synthase (EC 4.2.1.24);Porphobilinogen synthase (EC 4.2.1.24)	1	1	1	1	1	1	1	1
SEED;Cofactors, Vitamins, Prosthetic Groups, Pigments;Tetrapyrroles;Experimental_tye;Porphobilinogen deaminase (EC 2.5.1.61);Porphobilinogen deaminase (EC 2.5.1.61)	1	1	1	1	1	1	1	1
SEED;Cofactors, Vitamins, Prosthetic Groups, Pigments;Tetrapyrroles;Experimental_tye;Uroporphyrinogen-III synthase (EC 4.2.1.75);Uroporphyrinogen-III synthase (EC 4.2.1.75)	1	1	1	1	1	1	1	1
SEED;Cofactors, Vitamins, Prosthetic Groups, Pigments;Tetrapyrroles;Experimental_tye;Uroporphyrinogen III decarboxylase (EC 4.1.1.37);Uroporphyrinogen III decarboxylase (EC 4.1.1.37)	1	1	1	1	1	1	1	1
SEED;Cofactors, Vitamins, Prosthetic Groups, Pigments;Tetrapyrroles;Experimental_tye;Coproporphyrinogen III oxidase, aerobic (EC 1.3.3.3);Coproporphyrinogen III oxidase, aerobic (EC 1.3.3.3)	1	0	1	1	1	1	1	1
SEED;Cofactors, Vitamins, Prosthetic Groups, Pigments;Tetrapyrroles;Experimental_tye;Protoporphyrinogen IX oxidase, oxygen-independent, HemG (EC 1.3.-.-);Protoporphyrinogen IX oxidase, oxygen-independent, HemG (EC 1.3.-.-)	1	1	1	1	1	1	1	1
SEED;Cofactors, Vitamins, Prosthetic Groups, Pigments;Tetrapyrroles;Experimental_tye;Ferrochelatase, protoheme ferro-lyase (EC 4.99.1.1);Ferrochelatase, protoheme ferro-lyase (EC 4.99.1.1)	1	1	1	1	1	1	1	1
SEED;Cofactors, Vitamins, Prosthetic Groups, Pigments;Tetrapyrroles;Experimental_tye;Homolog of E. coli HemY protein;Homolog of E. coli HemY protein	1	1	1	1	1	1	1	1
SEED;Cofactors, Vitamins, Prosthetic Groups, Pigments;Tetrapyrroles;Experimental_tye;Protein of unknown function DUF414;Protein of unknown function DUF414	1	1	1	1	1	1	1	1
SEED;Cofactors, Vitamins, Prosthetic Groups, Pigments;Tetrapyrroles;Experimental_tye;Ribonuclease D (EC 3.1.26.3);Ribonuclease D (EC 3.1.26.3)	1	1	1	1	1	1	1	1
SEED;Cofactors, Vitamins, Prosthetic Groups, Pigments;Tetrapyrroles;Heme_and_Siroheme_Biosynthesis;Heme_and_Siroheme_Biosynthesis	2	2	2	2	1	1	1	1
SEED;Cofactors, Vitamins, Prosthetic Groups, Pigments;Tetrapyrroles;Heme_and_Siroheme_Biosynthesis;Radical SAM family enzyme, similar to coproporphyrinogen III oxidase, oxygen-independent, clustered with nucleoside-triphosphatase RdgB;Radical SAM family enzyme, similar to coproporphyrinogen III oxidase, oxygen-independent, clustered with nucleoside-triphosphatase RdgB	1	1	1	1	1	1	1	1
SEED;Cofactors, Vitamins, Prosthetic Groups, Pigments;Tetrapyrroles;Heme_and_Siroheme_Biosynthesis;Protoporphyrinogen IX oxidase, oxygen-independent, HemG (EC 1.3.-.-);Protoporphyrinogen IX oxidase, oxygen-independent, HemG (EC 1.3.-.-)	1	1	1	1	1	1	1	1
SEED;Cofactors, Vitamins, Prosthetic Groups, Pigments;Tetrapyrroles;Coenzyme_B12_biosynthesis;Cob(I)alamin adenosyltransferase (EC 2.5.1.17);Cob(I)alamin adenosyltransferase (EC 2.5.1.17)	1	1	1	1	1	1	1	1
SEED;Cofactors, Vitamins, Prosthetic Groups, Pigments;Tetrapyrroles;Coenzyme_B12_biosynthesis;Vitamin B12 ABC transporter, B12-binding component BtuF;Vitamin B12 ABC transporter, B12-binding component BtuF	1	1	1	1	1	1	1	1
SEED;Cofactors, Vitamins, Prosthetic Groups, Pigments;NAD and NADP;NAD_regulation;L-aspartate oxidase (EC 1.4.3.16);L-aspartate oxidase (EC 1.4.3.16)	1	1	1	1	1	1	1	1
SEED;Cofactors, Vitamins, Prosthetic Groups, Pigments;NAD and NADP;NAD_regulation;NAD synthetase (EC 6.3.1.5);NAD synthetase (EC 6.3.1.5)	1	1	1	1	1	1	1	1
SEED;Cofactors, Vitamins, Prosthetic Groups, Pigments;NAD and NADP;NAD_regulation;Nicotinate phosphoribosyltransferase (EC 2.4.2.11);Nicotinate phosphoribosyltransferase (EC 2.4.2.11)	1	1	1	1	1	1	1	1
SEED;Cofactors, Vitamins, Prosthetic Groups, Pigments;NAD and NADP;NAD_regulation;Ribosyl nicotinamide transporter, PnuC-like;Ribosyl nicotinamide transporter, PnuC-like	1	1	2	1	1	1	1	1
SEED;Cofactors, Vitamins, Prosthetic Groups, Pigments;NAD and NADP;NAD_regulation;NadR transcriptional regulator;NadR transcriptional regulator	1	1	1	1	1	1	1	1
SEED;Cofactors, Vitamins, Prosthetic Groups, Pigments;NAD and NADP;PnuC-like_transporters;Ribosyl nicotinamide transporter, PnuC-like;Ribosyl nicotinamide transporter, PnuC-like	1	1	2	1	1	1	1	1
SEED;Cofactors, Vitamins, Prosthetic Groups, Pigments;NAD and NADP;NAD_and_NADP_cofactor_biosynthesis_global;NAD kinase (EC 2.7.1.23);NAD kinase (EC 2.7.1.23)	1	1	1	1	1	1	1	1
SEED;Cofactors, Vitamins, Prosthetic Groups, Pigments;NAD and NADP;NAD_and_NADP_cofactor_biosynthesis_global;Ribosyl nicotinamide transporter, PnuC-like;Ribosyl nicotinamide transporter, PnuC-like	1	1	2	1	1	1	1	1
SEED;Cofactors, Vitamins, Prosthetic Groups, Pigments;NAD and NADP;NAD_and_NADP_cofactor_biosynthesis_global;ADP-ribose pyrophosphatase (EC 3.6.1.13);ADP-ribose pyrophosphatase (EC 3.6.1.13)	1	1	1	1	1	1	1	1
SEED;Cofactors, Vitamins, Prosthetic Groups, Pigments;NAD and NADP;NAD_and_NADP_cofactor_biosynthesis_global;NadR transcriptional regulator;NadR transcriptional regulator	1	1	1	1	1	1	1	1
SEED;Cofactors, Vitamins, Prosthetic Groups, Pigments;NAD and NADP;NAD_and_NADP_cofactor_biosynthesis_global;Nicotinamidase/isochorismatase family protein;Nicotinamidase/isochorismatase family protein	1	1	1	1	1	1	1	1
SEED;Cofactors, Vitamins, Prosthetic Groups, Pigments;NAD and NADP;NAD_and_NADP_cofactor_biosynthesis_global;Nicotinamidase family protein YcaC;Nicotinamidase family protein YcaC	1	0	1	1	1	1	1	1
SEED;Cofactors, Vitamins, Prosthetic Groups, Pigments;Thiamin_biosynthesis;Thiamin biosynthesis protein ThiC;Thiamin biosynthesis protein ThiC	1	1	1	1	1	1	1	1
SEED;Cofactors, Vitamins, Prosthetic Groups, Pigments;Thiamin_biosynthesis;Thiazole biosynthesis protein ThiG;Thiazole biosynthesis protein ThiG	1	1	1	1	1	1	1	1
SEED;Cofactors, Vitamins, Prosthetic Groups, Pigments;Thiamin_biosynthesis;Thiazole biosynthesis protein ThiH;Thiazole biosynthesis protein ThiH	1	1	1	1	1	1	1	1
SEED;Cofactors, Vitamins, Prosthetic Groups, Pigments;Thiamin_biosynthesis;Sulfur carrier protein ThiS;Sulfur carrier protein ThiS	1	1	1	1	1	1	1	1
SEED;Cofactors, Vitamins, Prosthetic Groups, Pigments;Thiamin_biosynthesis;Sulfur carrier protein adenylyltransferase ThiF;Sulfur carrier protein adenylyltransferase ThiF	1	1	1	1	1	1	1	1
SEED;Cofactors, Vitamins, Prosthetic Groups, Pigments;Thiamin_biosynthesis;Phosphomethylpyrimidine kinase (EC 2.7.4.7);Phosphomethylpyrimidine kinase (EC 2.7.4.7)	1	1	1	1	1	1	1	1
SEED;Cofactors, Vitamins, Prosthetic Groups, Pigments;Thiamin_biosynthesis;Hydroxyethylthiazole kinase (EC 2.7.1.50);Hydroxyethylthiazole kinase (EC 2.7.1.50)	1	1	1	1	1	1	1	1
SEED;Cofactors, Vitamins, Prosthetic Groups, Pigments;Thiamin_biosynthesis;Thiamin-phosphate pyrophosphorylase (EC 2.5.1.3);Thiamin-phosphate pyrophosphorylase (EC 2.5.1.3)	1	1	1	1	1	1	1	1
SEED;Cofactors, Vitamins, Prosthetic Groups, Pigments;Thiamin_biosynthesis;Thiamine-monophosphate kinase (EC 2.7.4.16);Thiamine-monophosphate kinase (EC 2.7.4.16)	1	1	1	1	1	1	1	1
SEED;Cofactors, Vitamins, Prosthetic Groups, Pigments;Thiamin_biosynthesis;Thiamin ABC transporter, substrate-binding component;Thiamin ABC transporter, substrate-binding component	1	1	1	1	1	1	1	1
SEED;Cofactors, Vitamins, Prosthetic Groups, Pigments;Thiamin_biosynthesis;Thiamin ABC transporter, transmembrane component;Thiamin ABC transporter, transmembrane component	1	1	1	1	1	1	1	1
SEED;Cofactors, Vitamins, Prosthetic Groups, Pigments;Thiamin_biosynthesis;Thiamin ABC transporter, ATPase component;Thiamin ABC transporter, ATPase component	1	1	1	1	1	1	1	1
SEED;Cofactors, Vitamins, Prosthetic Groups, Pigments;Coenzyme A;Coenzyme_A_Biosynthesis;Aspartate 1-decarboxylase (EC 4.1.1.11);Aspartate 1-decarboxylase (EC 4.1.1.11)	1	1	1	1	1	1	1	1
SEED;Cofactors, Vitamins, Prosthetic Groups, Pigments;Coenzyme A;Coenzyme_A_Biosynthesis;3-methyl-2-oxobutanoate hydroxymethyltransferase (EC 2.1.2.11);3-methyl-2-oxobutanoate hydroxymethyltransferase (EC 2.1.2.11)	1	1	1	1	1	1	1	1
SEED;Cofactors, Vitamins, Prosthetic Groups, Pigments;Coenzyme A;Coenzyme_A_Biosynthesis;2-dehydropantoate 2-reductase (EC 1.1.1.169);2-dehydropantoate 2-reductase (EC 1.1.1.169)	1	1	2	2	1	1	1	1
SEED;Cofactors, Vitamins, Prosthetic Groups, Pigments;Coenzyme A;Coenzyme_A_Biosynthesis;Pantoate--beta-alanine ligase (EC 6.3.2.1);Pantoate--beta-alanine ligase (EC 6.3.2.1)	1	1	1	1	1	1	1	1
SEED;Cofactors, Vitamins, Prosthetic Groups, Pigments;Coenzyme A;Coenzyme_A_Biosynthesis;Pantothenate kinase (EC 2.7.1.33);Pantothenate kinase (EC 2.7.1.33)	1	1	1	1	1	1	1	1
SEED;Cofactors, Vitamins, Prosthetic Groups, Pigments;Coenzyme A;Coenzyme_A_Biosynthesis;Phosphopantetheine adenylyltransferase (EC 2.7.7.3);Phosphopantetheine adenylyltransferase (EC 2.7.7.3)	1	1	1	1	1	1	1	1
SEED;Cofactors, Vitamins, Prosthetic Groups, Pigments;Coenzyme A;Coenzyme_A_Biosynthesis;Dephospho-CoA kinase (EC 2.7.1.24);Dephospho-CoA kinase (EC 2.7.1.24)	1	1	1	1	1	1	1	1
SEED;Cofactors, Vitamins, Prosthetic Groups, Pigments;Pyridoxine;Pyridoxin_(Vitamin_B6)_Biosynthesis;Erythronate-4-phosphate dehydrogenase (EC 1.1.1.290);Erythronate-4-phosphate dehydrogenase (EC 1.1.1.290)	1	1	1	1	1	1	1	1
SEED;Cofactors, Vitamins, Prosthetic Groups, Pigments;Pyridoxine;Pyridoxin_(Vitamin_B6)_Biosynthesis;Pyridoxamine 5'-phosphate oxidase (EC 1.4.3.5);Pyridoxamine 5'-phosphate oxidase (EC 1.4.3.5)	1	1	1	1	1	1	1	1
SEED;Cofactors, Vitamins, Prosthetic Groups, Pigments;Pyridoxine;Pyridoxin_(Vitamin_B6)_Biosynthesis;Pyridoxal kinase (EC 2.7.1.35);Pyridoxal kinase (EC 2.7.1.35)	2	2	2	2	1	1	1	1
SEED;Cofactors, Vitamins, Prosthetic Groups, Pigments;Pyridoxine;Pyridoxin_(Vitamin_B6)_Biosynthesis;D-erythrose-4-phosphate dehydrogenase (EC 1.2.1.72);D-erythrose-4-phosphate dehydrogenase (EC 1.2.1.72)	1	1	1	1	1	1	1	1
SEED;Cofactors, Vitamins, Prosthetic Groups, Pigments;Biotin;Biotin_biosynthesis;Biotin operon repressor;Biotin operon repressor	1	1	1	1	1	1	1	1
SEED;Cofactors, Vitamins, Prosthetic Groups, Pigments;Biotin;Biotin_biosynthesis;8-amino-7-oxononanoate synthase (EC 2.3.1.47);8-amino-7-oxononanoate synthase (EC 2.3.1.47)	1	1	1	1	1	1	1	1
SEED;Cofactors, Vitamins, Prosthetic Groups, Pigments;Biotin;Biotin_biosynthesis;Adenosylmethionine-8-amino-7-oxononanoate aminotransferase (EC 2.6.1.62);Adenosylmethionine-8-amino-7-oxononanoate aminotransferase (EC 2.6.1.62)	1	1	1	1	1	1	1	1
SEED;Cofactors, Vitamins, Prosthetic Groups, Pigments;Biotin;Biotin_biosynthesis;Biotin synthase (EC 2.8.1.6);Biotin synthase (EC 2.8.1.6)	1	1	1	1	1	1	1	1
SEED;Cofactors, Vitamins, Prosthetic Groups, Pigments;Biotin;Biotin_biosynthesis;Biotin synthesis protein bioC;Biotin synthesis protein bioC	3	2	3	2	1	1	0.656312	1
SEED;Cofactors, Vitamins, Prosthetic Groups, Pigments;Biotin;Biotin_biosynthesis;Biotin synthesis protein bioH;Biotin synthesis protein bioH	1	1	1	1	1	1	1	1
SEED;Virulence;Invasion and intracellular resistance;pVir_Plasmid_of_Campylobacter;DNA topoisomerase I (EC 5.99.1.2);DNA topoisomerase I (EC 5.99.1.2)	1	1	1	1	1	1	1	1
SEED;Virulence;Resistance to antibiotics and toxic compounds;Resistance_to_fluoroquinolones;Topoisomerase IV subunit A (EC 5.99.1.-);Topoisomerase IV subunit A (EC 5.99.1.-)	1	1	1	1	1	1	1	1
SEED;Virulence;Resistance to antibiotics and toxic compounds;Resistance_to_fluoroquinolones;Topoisomerase IV subunit B (EC 5.99.1.-);Topoisomerase IV subunit B (EC 5.99.1.-)	1	1	1	1	1	1	1	1
SEED;Virulence;Resistance to antibiotics and toxic compounds;Resistance_to_fluoroquinolones;DNA gyrase subunit A (EC 5.99.1.3);DNA gyrase subunit A (EC 5.99.1.3)	1	1	1	1	1	1	1	1
SEED;Virulence;Resistance to antibiotics and toxic compounds;Resistance_to_fluoroquinolones;DNA gyrase subunit B (EC 5.99.1.3);DNA gyrase subunit B (EC 5.99.1.3)	1	1	1	1	1	1	1	1
SEED;Virulence;Resistance to antibiotics and toxic compounds;Copper_homeostasis:_copper_tolerance;Suppression of copper sensitivity: putative copper binding protein ScsA;Suppression of copper sensitivity: putative copper binding protein ScsA	1	1	1	1	1	1	1	1
SEED;Virulence;Resistance to antibiotics and toxic compounds;Copper_homeostasis:_copper_tolerance;Membrane protein, suppressor for copper-sensitivity ScsB;Membrane protein, suppressor for copper-sensitivity ScsB	1	1	1	1	1	1	1	1
SEED;Virulence;Resistance to antibiotics and toxic compounds;Copper_homeostasis:_copper_tolerance;Secreted protein, suppressor for copper-sensitivity ScsC;Secreted protein, suppressor for copper-sensitivity ScsC	1	1	1	1	1	1	1	1
SEED;Virulence;Resistance to antibiotics and toxic compounds;Copper_homeostasis:_copper_tolerance;Membrane protein, suppressor for copper-sensitivity ScsD;Membrane protein, suppressor for copper-sensitivity ScsD	1	1	1	1	1	1	1	1
SEED;Virulence;Resistance to antibiotics and toxic compounds;Copper_homeostasis:_copper_tolerance;Periplasmic divalent cation tolerance protein cutA;Periplasmic divalent cation tolerance protein cutA	1	1	1	1	1	1	1	1
SEED;Virulence;Resistance to antibiotics and toxic compounds;Copper_homeostasis:_copper_tolerance;Cytoplasmic copper homeostasis protein cutC;Cytoplasmic copper homeostasis protein cutC	1	1	1	1	1	1	1	1
SEED;Virulence;Resistance to antibiotics and toxic compounds;Copper_homeostasis:_copper_tolerance;Copper homeostasis protein CutE;Copper homeostasis protein CutE	1	1	1	1	1	1	1	1
SEED;Virulence;Resistance to antibiotics and toxic compounds;Copper_homeostasis:_copper_tolerance;Magnesium and cobalt efflux protein CorC;Magnesium and cobalt efflux protein CorC	1	1	1	1	1	1	1	1
SEED;Virulence;Resistance to antibiotics and toxic compounds;Streptothricin_resistance;Streptothricin_resistance	1	0	1	0	1	1	0.423708	1
SEED;Virulence;Resistance to antibiotics and toxic compounds;Streptothricin_resistance;Streptothricin acetyltransferase, Streptomyces lavendulae type;Streptothricin acetyltransferase, Streptomyces lavendulae type	1	0	1	0	1	1	0.423708	1
SEED;Virulence;Resistance to antibiotics and toxic compounds;Fosfomycin_resistance;Fosfomycin_resistance	1	1	1	1	1	1	1	1
SEED;Virulence;Resistance to antibiotics and toxic compounds;Fosfomycin_resistance;Fosfomycin resistance protein FosA;Fosfomycin resistance protein FosA	1	1	1	1	1	1	1	1
SEED;Virulence;Resistance to antibiotics and toxic compounds;Multidrug_Resistance_Efflux_Pumps;RND efflux system, outer membrane lipoprotein CmeC;RND efflux system, outer membrane lipoprotein CmeC	0	0	0	1	1	1	1	1
SEED;Virulence;Resistance to antibiotics and toxic compounds;Multidrug_Resistance_Efflux_Pumps;Multi antimicrobial extrusion protein (Na(+)/drug antiporter), MATE family of MDR efflux pumps;Multi antimicrobial extrusion protein (Na(+)/drug antiporter), MATE family of MDR efflux pumps	1	1	1	1	1	1	1	1
SEED;Virulence;Resistance to antibiotics and toxic compounds;Multidrug_Resistance_Efflux_Pumps;Macrolide-specific efflux protein MacA;Macrolide-specific efflux protein MacA	1	1	1	2	1	1	1	1
SEED;Virulence;Resistance to antibiotics and toxic compounds;Multidrug_Resistance_Efflux_Pumps;Macrolide export ATP-binding/permease protein MacB (EC 3.6.3.-);Macrolide export ATP-binding/permease protein MacB (EC 3.6.3.-)	1	1	1	2	1	1	1	1
SEED;Virulence;Resistance to antibiotics and toxic compounds;Multidrug_Resistance_Efflux_Pumps;RND efflux system, outer membrane lipoprotein, NodT family;RND efflux system, outer membrane lipoprotein, NodT family	0	0	1	1	1	1	1	1
SEED;Virulence;Resistance to antibiotics and toxic compounds;Multidrug_Resistance_Efflux_Pumps;Type I secretion outer membrane protein, TolC precursor;Type I secretion outer membrane protein, TolC precursor	1	1	1	1	1	1	1	1
SEED;Virulence;Resistance to antibiotics and toxic compounds;Multidrug_Resistance_Efflux_Pumps;Membrane fusion protein of RND family multidrug efflux pump;Membrane fusion protein of RND family multidrug efflux pump	1	1	2	1	1	1	1	1
SEED;Virulence;Resistance to antibiotics and toxic compounds;Cobalt-zinc-cadmium_resistance;Cobalt-zinc-cadmium resistance protein CzcD;Cobalt-zinc-cadmium resistance protein CzcD	0	0	0	1	1	1	1	1
SEED;Virulence;Resistance to antibiotics and toxic compounds;Cobalt-zinc-cadmium_resistance;Zinc transporter ZitB;Zinc transporter ZitB	1	1	1	1	1	1	1	1
SEED;Virulence;Resistance to antibiotics and toxic compounds;Cobalt-zinc-cadmium_resistance;Probable Co/Zn/Cd efflux system membrane fusion protein;Probable Co/Zn/Cd efflux system membrane fusion protein	1	0	1	0	1	1	0.423708	1
SEED;Virulence;Resistance to antibiotics and toxic compounds;Cobalt-zinc-cadmium_resistance;Transcriptional regulator, MerR family;Transcriptional regulator, MerR family	3	3	4	3	1	1	0.702896	1
SEED;Virulence;Resistance to antibiotics and toxic compounds;Arsenic_resistance;Arsenical-resistance protein ACR3;Arsenical-resistance protein ACR3	0	0	0	1	1	1	1	1
SEED;Virulence;Resistance to antibiotics and toxic compounds;Copper_homeostasis;Cu(I)-responsive transcriptional regulator;Cu(I)-responsive transcriptional regulator	1	1	2	1	1	1	1	1
SEED;Virulence;Resistance to antibiotics and toxic compounds;Copper_homeostasis;Blue copper oxidase CueO precursor;Blue copper oxidase CueO precursor	1	1	1	1	1	1	1	1
SEED;Virulence;Resistance to antibiotics and toxic compounds;Multidrug_efflux_pump_in_Campylobacter_jejuni_(CmeABC_operon);RND efflux system, outer membrane lipoprotein CmeC;RND efflux system, outer membrane lipoprotein CmeC	0	0	0	1	1	1	1	1
SEED;Virulence;Resistance to antibiotics and toxic compounds;Mercury_resistance_operon;Mercuric transport protein, MerC;Mercuric transport protein, MerC	0	0	0	1	1	1	1	1
SEED;Virulence;Resistance to antibiotics and toxic compounds;Multidrug_Resistance,_Tripartite_Systems_Found_in_Gram_Negative_Bacteria;Membrane fusion component of tripartite multidrug resistance system;Membrane fusion component of tripartite multidrug resistance system	1	1	1	1	1	1	1	1
SEED;Virulence;Resistance to antibiotics and toxic compounds;Multidrug_Resistance,_Tripartite_Systems_Found_in_Gram_Negative_Bacteria;Transcription repressor of tripartite multidrug resistance system;Transcription repressor of tripartite multidrug resistance system	1	1	1	1	1	1	1	1
SEED;Virulence;Resistance to antibiotics and toxic compounds;Beta-lactamase;Beta-lactamase	3	3	4	3	1	1	0.702896	1
SEED;Virulence;Resistance to antibiotics and toxic compounds;Beta-lactamase;Beta-lactamase;Beta-lactamase	3	3	4	3	1	1	0.702896	1
SEED;Virulence;Adhesion;Curli_production;Transcriptional regulator CsgD for 2nd curli operon;Transcriptional regulator CsgD for 2nd curli operon	0	1	1	1	1	1	1	1
SEED;Virulence;Adhesion;Curli_production;Major curlin subunit precursor CsgA;Major curlin subunit precursor CsgA	0	1	1	1	1	1	1	1
SEED;Virulence;Adhesion;Curli_production;Minor curlin subunit CsgB, nucleation component of curlin monomers;Minor curlin subunit CsgB, nucleation component of curlin monomers	0	1	1	1	1	1	1	1
SEED;Virulence;Adhesion;Curli_production;Curli production assembly/transport component CsgF;Curli production assembly/transport component CsgF	0	1	1	1	1	1	1	1
SEED;Virulence;Adhesion;Curli_production;Curli production assembly/transport component CsgG;Curli production assembly/transport component CsgG	0	1	1	1	1	1	1	1
SEED;Virulence;Adhesion;Curli_production;Putative curli production protein CsgC;Putative curli production protein CsgC	0	1	1	1	1	1	1	1
SEED;Virulence;Adhesion;Streptococcus_pyogenes_recombinatorial_zone;Streptococcus_pyogenes_recombinatorial_zone	1	1	1	1	1	1	1	1
SEED;Virulence;Adhesion;Streptococcus_pyogenes_recombinatorial_zone;Signal peptidase I;Signal peptidase I	1	1	1	1	1	1	1	1
SEED;Virulence;Type III, Type IV, Type VI, ESAT secretion systems;Type_4_secretion_and_conjugative_transfer;Conjugative signal peptidase TrhF;Conjugative signal peptidase TrhF	0	0	0	1	1	1	1	1
SEED;Virulence;Type III, Type IV, Type VI, ESAT secretion systems;Type_4_secretion_and_conjugative_transfer;IncF plasmid conjugative transfer DNA-nicking and unwinding protein TraI;IncF plasmid conjugative transfer DNA-nicking and unwinding protein TraI	0	1	1	1	1	1	1	1
SEED;Virulence;Type III, Type IV, Type VI, ESAT secretion systems;Type_4_secretion_and_conjugative_transfer;IncF plasmid conjugative transfer pilin acetylase TraX;IncF plasmid conjugative transfer pilin acetylase TraX	0	1	1	1	1	1	1	1
SEED;Virulence;Type III, Type IV, Type VI, ESAT secretion systems;Type_4_secretion_and_conjugative_transfer;Conjugative transfer protein TrbJ;Conjugative transfer protein TrbJ	0	0	0	1	1	1	1	1
SEED;Virulence;Type III, Type IV, Type VI, ESAT secretion systems;Type_4_secretion_and_conjugative_transfer;Conjugative transfer protein TrbL;Conjugative transfer protein TrbL	0	0	0	1	1	1	1	1
SEED;Virulence;Type III, Type IV, Type VI, ESAT secretion systems;Type_4_secretion_and_conjugative_transfer;IncW plasmid conjugative relaxase protein TrwC (TraI homolog);IncW plasmid conjugative relaxase protein TrwC (TraI homolog)	0	0	0	1	1	1	1	1
SEED;Virulence;Type III, Type IV, Type VI, ESAT secretion systems;Mannose-sensitive_hemagglutinin_type_4_pilus;Mannose-sensitive_hemagglutinin_type_4_pilus	0	0	0	1	1	1	1	1
SEED;Virulence;Type III, Type IV, Type VI, ESAT secretion systems;Mannose-sensitive_hemagglutinin_type_4_pilus;MSHA biogenesis protein MshM;MSHA biogenesis protein MshM	0	0	0	1	1	1	1	1
SEED;Virulence;Type III, Type IV, Type VI, ESAT secretion systems;Type_III_secretion_system_orphans;Type_III_secretion_system_orphans	2	2	2	3	1	1	1	1
SEED;Virulence;Type III, Type IV, Type VI, ESAT secretion systems;Type_III_secretion_system_orphans;BarA sensory histidine kinase (= VarS = GacS);BarA sensory histidine kinase (= VarS = GacS)	1	1	1	1	1	1	1	1
SEED;Virulence;Type III, Type IV, Type VI, ESAT secretion systems;Type_III_secretion_system_orphans;BarA-associated response regulator UvrY (= GacA = SirA);BarA-associated response regulator UvrY (= GacA = SirA)	1	1	1	2	1	1	1	1
SEED;Virulence;Type III, Type IV, Type VI, ESAT secretion systems;Type_4_conjugative_transfer_system,_IncI1_type;IncI1 plasmid conjugative transfer protein PilL;IncI1 plasmid conjugative transfer protein PilL	0	0	0	1	1	1	1	1
SEED;Virulence;Type III, Type IV, Type VI, ESAT secretion systems;Type_4_conjugative_transfer_system,_IncI1_type;IncI1 plasmid conjugative transfer protein PilM;IncI1 plasmid conjugative transfer protein PilM	0	0	0	1	1	1	1	1
SEED;Virulence;Type III, Type IV, Type VI, ESAT secretion systems;Type_4_conjugative_transfer_system,_IncI1_type;IncI1 plasmid conjugative transfer lipoprotein PilN;IncI1 plasmid conjugative transfer lipoprotein PilN	0	0	0	1	1	1	1	1
SEED;Virulence;Type III, Type IV, Type VI, ESAT secretion systems;Type_4_conjugative_transfer_system,_IncI1_type;IncI1 plasmid pilus assembly protein PilO;IncI1 plasmid pilus assembly protein PilO	0	0	0	1	1	1	1	1
SEED;Virulence;Type III, Type IV, Type VI, ESAT secretion systems;Type_4_conjugative_transfer_system,_IncI1_type;IncI1 plasmid conjugative transfer ATPase PilQ;IncI1 plasmid conjugative transfer ATPase PilQ	0	0	0	1	1	1	1	1
SEED;Virulence;Type III, Type IV, Type VI, ESAT secretion systems;Type_4_conjugative_transfer_system,_IncI1_type;IncI1 plasmid conjugative transfer inner membrane protein PilR;IncI1 plasmid conjugative transfer inner membrane protein PilR	0	0	0	1	1	1	1	1
SEED;Virulence;Type III, Type IV, Type VI, ESAT secretion systems;Type_4_conjugative_transfer_system,_IncI1_type;IncI1 plasmid conjugative transfer prepilin PilS;IncI1 plasmid conjugative transfer prepilin PilS	0	0	0	1	1	1	1	1
SEED;Virulence;Type III, Type IV, Type VI, ESAT secretion systems;Type_4_conjugative_transfer_system,_IncI1_type;Type-IV sectretion leader peptidase/N-methyltransferase;Type-IV sectretion leader peptidase/N-methyltransferase	0	0	0	1	1	1	1	1
SEED;Virulence;Type III, Type IV, Type VI, ESAT secretion systems;Type_4_conjugative_transfer_system,_IncI1_type;IncI1 plasmid conjugative transfer pilus-tip adhesin protein PilV;IncI1 plasmid conjugative transfer pilus-tip adhesin protein PilV	0	0	0	1	1	1	1	1
SEED;Virulence;Type III, Type IV, Type VI, ESAT secretion systems;Type_4_conjugative_transfer_system,_IncI1_type;Shufflon-specific DNA recombinase;Shufflon-specific DNA recombinase	0	0	0	1	1	1	1	1
SEED;Virulence;Type III, Type IV, Type VI, ESAT secretion systems;Type_4_conjugative_transfer_system,_IncI1_type;IncI1 plasmid conjugative transfer protein TraE;IncI1 plasmid conjugative transfer protein TraE	0	0	0	1	1	1	1	1
SEED;Virulence;Type III, Type IV, Type VI, ESAT secretion systems;Type_4_conjugative_transfer_system,_IncI1_type;IncI1 plasmid conjugative transfer protein TraF;IncI1 plasmid conjugative transfer protein TraF	1	1	1	2	1	1	1	1
SEED;Virulence;Type III, Type IV, Type VI, ESAT secretion systems;Type_IV_pilus;Type IV pilin PilA;Type IV pilin PilA	1	1	1	1	1	1	1	1
SEED;Virulence;Type III, Type IV, Type VI, ESAT secretion systems;Type_IV_pilus;Type IV fimbrial assembly, ATPase PilB;Type IV fimbrial assembly, ATPase PilB	1	1	1	1	1	1	1	1
SEED;Virulence;Type III, Type IV, Type VI, ESAT secretion systems;Type_IV_pilus;Type IV fimbrial assembly protein PilC;Type IV fimbrial assembly protein PilC	1	1	1	1	1	1	1	1
SEED;Virulence;Type III, Type IV, Type VI, ESAT secretion systems;Type_IV_pilus;Type IV pilus biogenesis protein PilQ;Type IV pilus biogenesis protein PilQ	1	1	1	2	1	1	1	1
SEED;Virulence;Type III, Type IV, Type VI, ESAT secretion systems;Type_IV_pilus;Type IV pilus biogenesis protein PilM;Type IV pilus biogenesis protein PilM	1	1	1	1	1	1	1	1
SEED;Virulence;Type III, Type IV, Type VI, ESAT secretion systems;Type_IV_pilus;Type IV pilus biogenesis protein PilN;Type IV pilus biogenesis protein PilN	1	1	1	1	1	1	1	1
SEED;Virulence;Type III, Type IV, Type VI, ESAT secretion systems;Type_IV_pilus;Type IV pilus biogenesis protein PilO;Type IV pilus biogenesis protein PilO	1	1	1	1	1	1	1	1
SEED;Virulence;Quorum sensing and biofilm formation;Quorum_sensing_regulation_in_Pseudomonas;Quorum_sensing_regulation_in_Pseudomonas	1	1	1	2	1	1	1	1
SEED;Virulence;Quorum sensing and biofilm formation;Quorum_sensing_regulation_in_Pseudomonas;BarA-associated response regulator UvrY (= GacA = SirA);BarA-associated response regulator UvrY (= GacA = SirA)	1	1	1	2	1	1	1	1
SEED;Virulence;Quorum sensing and biofilm formation;Autoinducer_2_(AI-2)_transport_and_processing_(lsrACDBFGE_operon);Autoinducer 2 (AI-2) kinase LsrK (EC 2.7.1.-);Autoinducer 2 (AI-2) kinase LsrK (EC 2.7.1.-)	1	0	1	1	1	1	1	1
SEED;Virulence;Quorum sensing and biofilm formation;Autoinducer_2_(AI-2)_transport_and_processing_(lsrACDBFGE_operon);LsrR, transcriptional repressor of lsr operon;LsrR, transcriptional repressor of lsr operon	1	1	1	1	1	1	1	1
SEED;Virulence;Quorum sensing and biofilm formation;Autoinducer_2_(AI-2)_transport_and_processing_(lsrACDBFGE_operon);Autoinducer 2 (AI-2) ABC transport system, periplasmic AI-2 binding protein LsrB;Autoinducer 2 (AI-2) ABC transport system, periplasmic AI-2 binding protein LsrB	1	1	1	1	1	1	1	1
SEED;Virulence;Quorum sensing and biofilm formation;Autoinducer_2_(AI-2)_transport_and_processing_(lsrACDBFGE_operon);Autoinducer 2 (AI-2) ABC transport system, membrane channel protein LsrC;Autoinducer 2 (AI-2) ABC transport system, membrane channel protein LsrC	1	1	1	1	1	1	1	1
SEED;Virulence;Quorum sensing and biofilm formation;Autoinducer_2_(AI-2)_transport_and_processing_(lsrACDBFGE_operon);Autoinducer 2 (AI-2) ABC transport system, membrane channel protein LsrD;Autoinducer 2 (AI-2) ABC transport system, membrane channel protein LsrD	1	1	1	1	1	1	1	1
SEED;Virulence;Quorum sensing and biofilm formation;Autoinducer_2_(AI-2)_transport_and_processing_(lsrACDBFGE_operon);Autoinducer 2 (AI-2) aldolase LsrF (EC 4.2.1.-);Autoinducer 2 (AI-2) aldolase LsrF (EC 4.2.1.-)	1	1	1	1	1	1	1	1
SEED;Virulence;Quorum sensing and biofilm formation;Autoinducer_2_(AI-2)_transport_and_processing_(lsrACDBFGE_operon);Autoinducer 2 (AI-2) modifying protein LsrG;Autoinducer 2 (AI-2) modifying protein LsrG	1	1	1	1	1	1	1	1
SEED;Virulence;Ton_and_Tol_transport_systems;Ferric siderophore transport system, periplasmic binding protein TonB;Ferric siderophore transport system, periplasmic binding protein TonB	1	1	2	1	1	1	1	1
SEED;Virulence;Ton_and_Tol_transport_systems;Biopolymer transport protein ExbD/TolR;Biopolymer transport protein ExbD/TolR	1	1	1	1	1	1	1	1
SEED;Virulence;Ton_and_Tol_transport_systems;MotA/TolQ/ExbB proton channel family protein;MotA/TolQ/ExbB proton channel family protein	2	2	2	2	1	1	1	1
SEED;Virulence;Ton_and_Tol_transport_systems;tolB protein precursor, periplasmic protein involved in the tonb-independent uptake of group A colicins;tolB protein precursor, periplasmic protein involved in the tonb-independent uptake of group A colicins	1	1	1	1	1	1	1	1
SEED;Virulence;Ton_and_Tol_transport_systems;Tol biopolymer transport system, TolR protein;Tol biopolymer transport system, TolR protein	1	1	1	1	1	1	1	1
SEED;Virulence;Ton_and_Tol_transport_systems;Peptidoglycan-associated lipoprotein precursor;Peptidoglycan-associated lipoprotein precursor	1	1	1	1	1	1	1	1
SEED;Virulence;Ton_and_Tol_transport_systems;TPR repeat containing exported protein;TPR repeat containing exported protein	1	1	1	1	1	1	1	1
SEED;Virulence;Ton_and_Tol_transport_systems;Colicin I receptor precursor;Colicin I receptor precursor	0	0	0	1	1	1	1	1
SEED;Virulence;Ton_and_Tol_transport_systems;Outer membrane ferripyoverdine receptor;Outer membrane ferripyoverdine receptor	1	1	1	1	1	1	1	1
SEED;Virulence;Ton_and_Tol_transport_systems;Type I secretion outer membrane protein, TolC precursor;Type I secretion outer membrane protein, TolC precursor	1	1	1	1	1	1	1	1
SEED;Virulence;Ton_and_Tol_transport_systems;Protein-L-isoaspartate O-methyltransferase (EC 2.1.1.77);Protein-L-isoaspartate O-methyltransferase (EC 2.1.1.77)	1	1	1	1	1	1	1	1
SEED;Virulence;Ton_and_Tol_transport_systems;TonB-dependent hemin , ferrichrome receptor;TonB-dependent hemin , ferrichrome receptor	1	1	1	1	1	1	1	1
SEED;Virulence;Iron Scavenging Mechanisms;Heme,_hemin_uptake_and_utilization_systems_in_GramPositives;Heme,_hemin_uptake_and_utilization_systems_in_GramPositives	3	2	3	2	1	1	0.656312	1
SEED;Virulence;Iron Scavenging Mechanisms;Heme,_hemin_uptake_and_utilization_systems_in_GramPositives;Hemin transport protein HmuS;Hemin transport protein HmuS	1	1	2	1	1	1	1	1
SEED;Virulence;Iron Scavenging Mechanisms;Heme,_hemin_uptake_and_utilization_systems_in_GramPositives;Hypothetical protein DUF454;Hypothetical protein DUF454	1	1	1	1	1	1	1	1
SEED;Virulence;Iron Scavenging Mechanisms;Iron_acquisition_in_Vibrio;Ferric hydroxamate ABC transporter (TC 3.A.1.14.3), ATP-binding protein FhuC;Ferric hydroxamate ABC transporter (TC 3.A.1.14.3), ATP-binding protein FhuC	1	1	1	1	1	1	1	1
SEED;Virulence;Iron Scavenging Mechanisms;Iron_acquisition_in_Vibrio;Ferric hydroxamate ABC transporter (TC 3.A.1.14.3), permease component FhuB;Ferric hydroxamate ABC transporter (TC 3.A.1.14.3), permease component FhuB	1	1	1	1	1	1	1	1
SEED;Virulence;Iron Scavenging Mechanisms;Iron_acquisition_in_Vibrio;Ferrous iron transport protein A;Ferrous iron transport protein A	1	1	1	1	1	1	1	1
SEED;Virulence;Iron Scavenging Mechanisms;Iron_acquisition_in_Vibrio;Ferrous iron transport protein B;Ferrous iron transport protein B	1	1	1	1	1	1	1	1
SEED;Virulence;Iron Scavenging Mechanisms;Iron_acquisition_in_Vibrio;Ferric iron ABC transporter, ATP-binding protein;Ferric iron ABC transporter, ATP-binding protein	0	1	1	1	1	1	1	1
SEED;Virulence;Iron Scavenging Mechanisms;Iron_acquisition_in_Vibrio;N6-hydroxylysine O-acetyltransferase (EC 2.3.1.102), aerobactin biosynthesis protein IucB;N6-hydroxylysine O-acetyltransferase (EC 2.3.1.102), aerobactin biosynthesis protein IucB	1	0	1	1	1	1	1	1
SEED;Virulence;Iron Scavenging Mechanisms;Iron_acquisition_in_Vibrio;L-lysine 6-monooxygenase [NADPH] (EC 1.14.13.59), aerobactin biosynthesis protein IucD;L-lysine 6-monooxygenase [NADPH] (EC 1.14.13.59), aerobactin biosynthesis protein IucD	1	0	1	1	1	1	1	1
SEED;Virulence;Iron Scavenging Mechanisms;Iron_acquisition_in_Vibrio;Bacterioferritin;Bacterioferritin	1	1	1	1	1	1	1	1
SEED;Virulence;Iron Scavenging Mechanisms;Iron_acquisition_in_Vibrio;Bacterioferritin-associated ferredoxin;Bacterioferritin-associated ferredoxin	1	1	1	1	1	1	1	1
SEED;Virulence;Iron Scavenging Mechanisms;Siderophore_Pyoverdine;Siderophore_Pyoverdine	1	1	1	1	1	1	1	1
SEED;Virulence;Iron Scavenging Mechanisms;Siderophore_Pyoverdine;Outer membrane ferripyoverdine receptor;Outer membrane ferripyoverdine receptor	1	1	1	1	1	1	1	1
SEED;Virulence;Iron Scavenging Mechanisms;Siderophore_Aerobactin;Ferric hydroxamate ABC transporter (TC 3.A.1.14.3), ATP-binding protein FhuC;Ferric hydroxamate ABC transporter (TC 3.A.1.14.3), ATP-binding protein FhuC	1	1	1	1	1	1	1	1
SEED;Virulence;Iron Scavenging Mechanisms;Siderophore_Aerobactin;Ferric hydroxamate ABC transporter (TC 3.A.1.14.3), permease component FhuB;Ferric hydroxamate ABC transporter (TC 3.A.1.14.3), permease component FhuB	1	1	1	1	1	1	1	1
SEED;Virulence;Iron Scavenging Mechanisms;Campylobacter_Iron_Metabolism;Ferrous iron transport protein B;Ferrous iron transport protein B	1	1	1	1	1	1	1	1
SEED;Virulence;Iron Scavenging Mechanisms;Campylobacter_Iron_Metabolism;Ferric siderophore transport system, periplasmic binding protein TonB;Ferric siderophore transport system, periplasmic binding protein TonB	1	1	2	1	1	1	1	1
SEED;Virulence;Iron Scavenging Mechanisms;Campylobacter_Iron_Metabolism;Ferric uptake regulation protein;Ferric uptake regulation protein	0	1	1	1	1	1	1	1
SEED;Virulence;Iron Scavenging Mechanisms;Transport_of_Iron;Ferrous iron transport protein B;Ferrous iron transport protein B	1	1	1	1	1	1	1	1
SEED;Virulence;Iron Scavenging Mechanisms;Transport_of_Iron;Ferrous iron transport protein A;Ferrous iron transport protein A	1	1	1	1	1	1	1	1
SEED;Virulence;Iron Scavenging Mechanisms;Transport_of_Iron;Ferric iron ABC transporter, ATP-binding protein;Ferric iron ABC transporter, ATP-binding protein	0	1	1	1	1	1	1	1
SEED;Virulence;Iron Scavenging Mechanisms;Hemin_transport_system;Periplasmic hemin-binding protein;Periplasmic hemin-binding protein	1	1	1	1	1	1	1	1
SEED;Virulence;Iron Scavenging Mechanisms;Hemin_transport_system;Hemin transport protein HmuS;Hemin transport protein HmuS	1	1	2	1	1	1	1	1
SEED;Virulence;Iron Scavenging Mechanisms;Hemin_transport_system;ABC-type hemin transport system, ATPase component;ABC-type hemin transport system, ATPase component	1	1	1	1	1	1	1	1
SEED;Virulence;Iron Scavenging Mechanisms;Hemin_transport_system;Ferric siderophore transport system, periplasmic binding protein TonB;Ferric siderophore transport system, periplasmic binding protein TonB	1	1	2	1	1	1	1	1
SEED;Virulence;Iron Scavenging Mechanisms;Hemin_transport_system;TonB-dependent hemin , ferrichrome receptor;TonB-dependent hemin , ferrichrome receptor	1	1	1	1	1	1	1	1
SEED;Virulence;Iron Scavenging Mechanisms;Hemin_transport_system;hemin ABC transporter, permease protein;hemin ABC transporter, permease protein	2	2	2	3	1	1	1	1
SEED;Virulence;Pathogenicity islands;Staphylococcal_pathogenicity_islands_SaPI;SSU ribosomal protein S18p;SSU ribosomal protein S18p	1	1	1	1	1	1	1	1
SEED;Virulence;Pathogenicity islands;Staphylococcal_pathogenicity_islands_SaPI;Heat shock protein 60 family chaperone GroEL;Heat shock protein 60 family chaperone GroEL	1	1	1	1	1	1	1	1
SEED;Virulence;Pathogenicity islands;Staphylococcal_pathogenicity_islands_SaPI;tmRNA-binding protein SmpB;tmRNA-binding protein SmpB	1	1	1	1	1	1	1	1
SEED;Virulence;Detection;Detection	2	2	2	2	1	1	1	1
SEED;Virulence;Detection;MLST;MLST	2	2	2	2	1	1	1	1
SEED;Virulence;Detection;MLST;Guanylate kinase (EC 2.7.4.8);Guanylate kinase (EC 2.7.4.8)	1	1	1	1	1	1	1	1
SEED;Virulence;Detection;MLST;Triosephosphate isomerase (EC 5.3.1.1);Triosephosphate isomerase (EC 5.3.1.1)	1	1	1	1	1	1	1	1
SEED;Virulence;Siderophore_Enterobactin;Isochorismate synthase (EC 5.4.4.2) [enterobactin] siderophore;Isochorismate synthase (EC 5.4.4.2) [enterobactin] siderophore	1	1	1	1	1	1	1	1
SEED;Virulence;Siderophore_Enterobactin;Apo-aryl carrier domain of EntB;Apo-aryl carrier domain of EntB	1	1	1	1	1	1	1	1
SEED;Virulence;Siderophore_Enterobactin;2,3-dihydro-2,3-dihydroxybenzoate dehydrogenase (EC 1.3.1.28) [enterobactin] siderophore;2,3-dihydro-2,3-dihydroxybenzoate dehydrogenase (EC 1.3.1.28) [enterobactin] siderophore	2	2	2	2	1	1	1	1
SEED;Virulence;Siderophore_Enterobactin;2,3-dihydroxybenzoate-AMP ligase (EC 2.7.7.58) [enterobactin] siderophore;2,3-dihydroxybenzoate-AMP ligase (EC 2.7.7.58) [enterobactin] siderophore	1	1	1	1	1	1	1	1
SEED;Virulence;Siderophore_Enterobactin;4'-phosphopantetheinyl transferase (EC 2.7.8.-) [enterobactin] siderophore;4'-phosphopantetheinyl transferase (EC 2.7.8.-) [enterobactin] siderophore	1	1	1	1	1	1	1	1
SEED;Virulence;Siderophore_Enterobactin;Proofreading thioesterase in enterobactin biosynthesis EntH;Proofreading thioesterase in enterobactin biosynthesis EntH	1	1	1	1	1	1	1	1
SEED;Virulence;Siderophore_Enterobactin;FIG005032: Putative cytoplasmic protein YbdZ in enterobactin biosynthesis operon;FIG005032: Putative cytoplasmic protein YbdZ in enterobactin biosynthesis operon	1	1	1	1	1	1	1	1
SEED;Virulence;Siderophore_Enterobactin;Enterobactin exporter EntS;Enterobactin exporter EntS	1	1	1	1	1	1	1	1
SEED;Virulence;Siderophore_Enterobactin;Enterobactin esterase;Enterobactin esterase	1	1	1	1	1	1	1	1
SEED;Virulence;Siderophore_Enterobactin;Outer membrane receptor for ferric enterobactin and colicins B, D;Outer membrane receptor for ferric enterobactin and colicins B, D	1	1	1	1	1	1	1	1
SEED;Virulence;Pseudomonas_quinolone_signal_PQS;Pseudomonas_quinolone_signal_PQS	1	1	1	2	1	1	1	1
SEED;Virulence;Pseudomonas_quinolone_signal_PQS;BarA-associated response regulator UvrY (= GacA = SirA);BarA-associated response regulator UvrY (= GacA = SirA)	1	1	1	2	1	1	1	1
SEED;Sulfur Metabolism;Sulfate_reduction-associated_complexes;Sulfate_reduction-associated_complexes	1	1	1	1	1	1	1	1
SEED;Sulfur Metabolism;Sulfate_reduction-associated_complexes;tRNA 2-thiouridine synthesizing protein E (EC 2.8.1.-);tRNA 2-thiouridine synthesizing protein E (EC 2.8.1.-)	1	1	1	1	1	1	1	1
SEED;Sulfur Metabolism;Organic sulfur assimilation;Alkanesulfonate_assimilation;Alkanesulfonates-binding protein;Alkanesulfonates-binding protein	1	1	1	1	1	1	1	1
SEED;Sulfur Metabolism;Organic sulfur assimilation;Alkanesulfonate_assimilation;Alkanesulfonate monooxygenase (EC 1.14.14.5);Alkanesulfonate monooxygenase (EC 1.14.14.5)	1	1	1	1	1	1	1	1
SEED;Sulfur Metabolism;Organic sulfur assimilation;Alkanesulfonate_assimilation;Alkanesulfonates ABC transporter ATP-binding protein;Alkanesulfonates ABC transporter ATP-binding protein	1	1	1	1	1	1	1	1
SEED;Sulfur Metabolism;Organic sulfur assimilation;Alkanesulfonate_assimilation;FMN reductase (EC 1.5.1.29);FMN reductase (EC 1.5.1.29)	1	1	1	1	1	1	1	1
SEED;Sulfur Metabolism;Organic sulfur assimilation;Alkanesulfonate_assimilation;Alkanesulfonates transport system permease protein;Alkanesulfonates transport system permease protein	1	1	1	1	1	1	1	1
SEED;Sulfur Metabolism;Organic sulfur assimilation;Alkanesulfonate_assimilation;Arylsulfatase (EC 3.1.6.1);Arylsulfatase (EC 3.1.6.1)	1	1	1	1	1	1	1	1
SEED;Sulfur Metabolism;Organic sulfur assimilation;Alkanesulfonate_assimilation;Alpha-ketoglutarate-dependent taurine dioxygenase (EC 1.14.11.17);Alpha-ketoglutarate-dependent taurine dioxygenase (EC 1.14.11.17)	1	1	2	1	1	1	1	1
SEED;Sulfur Metabolism;Organic sulfur assimilation;Alkanesulfonates_Utilization;Alkanesulfonates_Utilization	3	3	3	3	1	1	0.702896	1
SEED;Sulfur Metabolism;Organic sulfur assimilation;Alkanesulfonates_Utilization;Alkanesulfonates-binding protein;Alkanesulfonates-binding protein	1	1	1	1	1	1	1	1
SEED;Sulfur Metabolism;Organic sulfur assimilation;Alkanesulfonates_Utilization;Alkanesulfonates ABC transporter ATP-binding protein;Alkanesulfonates ABC transporter ATP-binding protein	1	1	1	1	1	1	1	1
SEED;Sulfur Metabolism;Organic sulfur assimilation;Alkanesulfonates_Utilization;Alkanesulfonates transport system permease protein;Alkanesulfonates transport system permease protein	1	1	1	1	1	1	1	1
SEED;Sulfur Metabolism;Organic sulfur assimilation;Utilization_of_glutathione_as_a_sulphur_source;Putative glutathione transporter, permease component;Putative glutathione transporter, permease component	2	2	2	2	1	1	1	1
SEED;Sulfur Metabolism;Organic sulfur assimilation;Utilization_of_glutathione_as_a_sulphur_source;Putative glutathione transporter,solute-binding component;Putative glutathione transporter,solute-binding component	1	1	1	1	1	1	1	1
SEED;Sulfur Metabolism;Organic sulfur assimilation;Taurine_Utilization;Taurine_Utilization	3	3	3	3	1	1	0.702896	1
SEED;Sulfur Metabolism;Organic sulfur assimilation;Taurine_Utilization;Taurine-binding periplasmic protein TauA;Taurine-binding periplasmic protein TauA	1	1	1	1	1	1	1	1
SEED;Sulfur Metabolism;Organic sulfur assimilation;Taurine_Utilization;Taurine transport ATP-binding protein TauB;Taurine transport ATP-binding protein TauB	1	1	1	1	1	1	1	1
SEED;Sulfur Metabolism;Organic sulfur assimilation;Taurine_Utilization;Taurine transport system permease protein TauC;Taurine transport system permease protein TauC	1	1	1	1	1	1	1	1
SEED;Sulfur Metabolism;Thioredoxin-disulfide_reductase;Alkyl hydroperoxide reductase protein F (EC 1.6.4.-);Alkyl hydroperoxide reductase protein F (EC 1.6.4.-)	1	1	1	1	1	1	1	1
SEED;Sulfur Metabolism;Thioredoxin-disulfide_reductase;Alkyl hydroperoxide reductase protein C (EC 1.6.4.-);Alkyl hydroperoxide reductase protein C (EC 1.6.4.-)	1	1	2	1	1	1	1	1
SEED;Sulfur Metabolism;Thioredoxin-disulfide_reductase;Thiol peroxidase, Tpx-type (EC 1.11.1.15);Thiol peroxidase, Tpx-type (EC 1.11.1.15)	1	1	1	1	1	1	1	1
SEED;Sulfur Metabolism;Thioredoxin-disulfide_reductase;Thiol peroxidase, Bcp-type (EC 1.11.1.15);Thiol peroxidase, Bcp-type (EC 1.11.1.15)	1	1	1	1	1	1	1	1
SEED;Sulfur Metabolism;Galactosylceramide_and_Sulfatide_metabolism;Galactosylceramide_and_Sulfatide_metabolism	1	1	1	1	1	1	1	1
SEED;Sulfur Metabolism;Galactosylceramide_and_Sulfatide_metabolism;Alpha-galactosidase (EC 3.2.1.22);Alpha-galactosidase (EC 3.2.1.22)	1	1	1	1	1	1	1	1
SEED;Sulfur Metabolism;Sulfur_oxidation;Regulatory protein SoxS;Regulatory protein SoxS	1	1	1	1	1	1	1	1
SEED;Stress Response;Oxidative stress;Glutathione:_Redox_cycle;Glutathione reductase (EC 1.8.1.7);Glutathione reductase (EC 1.8.1.7)	1	1	2	1	1	1	1	1
SEED;Stress Response;Oxidative stress;Glutathione:_Redox_cycle;Glutaredoxin 3;Glutaredoxin 3	1	1	1	1	1	1	1	1
SEED;Stress Response;Oxidative stress;Glutathione:_Redox_cycle;Glutaredoxin-like protein NrdH, required for reduction of Ribonucleotide reductase class Ib;Glutaredoxin-like protein NrdH, required for reduction of Ribonucleotide reductase class Ib	1	1	1	1	1	1	1	1
SEED;Stress Response;Oxidative stress;Glutathione:_Biosynthesis_and_gamma-glutamyl_cycle;Glutamate--cysteine ligase (EC 6.3.2.2);Glutamate--cysteine ligase (EC 6.3.2.2)	1	1	1	1	1	1	1	1
SEED;Stress Response;Oxidative stress;Glutathione:_Biosynthesis_and_gamma-glutamyl_cycle;Glutathione synthetase (EC 6.3.2.3);Glutathione synthetase (EC 6.3.2.3)	1	1	1	1	1	1	1	1
SEED;Stress Response;Oxidative stress;Glutathione:_Biosynthesis_and_gamma-glutamyl_cycle;Gamma-glutamyltranspeptidase (EC 2.3.2.2);Gamma-glutamyltranspeptidase (EC 2.3.2.2)	2	2	2	2	1	1	1	1
SEED;Stress Response;Oxidative stress;Rubrerythrin;Rubrerythrin	0	0	0	0	1	1	1	1
SEED;Stress Response;Oxidative stress;Oxidative_stress;Nitrite-sensitive transcriptional repressor NsrR;Nitrite-sensitive transcriptional repressor NsrR	1	1	1	1	1	1	1	1
SEED;Stress Response;Oxidative stress;Oxidative_stress;Non-specific DNA-binding protein Dps;Non-specific DNA-binding protein Dps	1	1	1	2	1	1	1	1
SEED;Stress Response;Oxidative stress;Oxidative_stress;Redox-sensitive transcriptional activator SoxR;Redox-sensitive transcriptional activator SoxR	1	1	1	1	1	1	1	1
SEED;Stress Response;Oxidative stress;Oxidative_stress;Regulatory protein SoxS;Regulatory protein SoxS	1	1	1	1	1	1	1	1
SEED;Stress Response;Oxidative stress;Oxidative_stress;Ferric uptake regulation protein;Ferric uptake regulation protein	0	1	1	1	1	1	1	1
SEED;Stress Response;Oxidative stress;Oxidative_stress;Fumarate and nitrate reduction regulatory protein;Fumarate and nitrate reduction regulatory protein	1	1	2	1	1	1	1	1
SEED;Stress Response;Oxidative stress;Oxidative_stress;Paraquat-inducible protein A;Paraquat-inducible protein A	2	2	2	2	1	1	1	1
SEED;Stress Response;Oxidative stress;Oxidative_stress;Zinc uptake regulation protein ZUR;Zinc uptake regulation protein ZUR	1	1	1	1	1	1	1	1
SEED;Stress Response;Oxidative stress;Oxidative_stress;Organic hydroperoxide resistance protein;Organic hydroperoxide resistance protein	1	1	1	1	1	1	1	1
SEED;Stress Response;Oxidative stress;Oxidative_stress;Superoxide dismutase [Fe] (EC 1.15.1.1);Superoxide dismutase [Fe] (EC 1.15.1.1)	1	1	1	1	1	1	1	1
SEED;Stress Response;Oxidative stress;Oxidative_stress;Superoxide dismutase [Cu-Zn] precursor (EC 1.15.1.1);Superoxide dismutase [Cu-Zn] precursor (EC 1.15.1.1)	1	1	1	1	1	1	1	1
SEED;Stress Response;Oxidative stress;Glutaredoxins;Glutaredoxin 3;Glutaredoxin 3	1	1	1	1	1	1	1	1
SEED;Stress Response;Oxidative stress;Glutaredoxins;Probable monothiol glutaredoxin GrlA;Probable monothiol glutaredoxin GrlA	1	1	1	1	1	1	1	1
SEED;Stress Response;Oxidative stress;Glutaredoxins;Glutaredoxin-like protein NrdH, required for reduction of Ribonucleotide reductase class Ib;Glutaredoxin-like protein NrdH, required for reduction of Ribonucleotide reductase class Ib	1	1	1	1	1	1	1	1
SEED;Stress Response;Oxidative stress;Redox-dependent_regulation_of_nucleus_processes;Redox-dependent_regulation_of_nucleus_processes	1	1	1	1	1	1	1	1
SEED;Stress Response;Oxidative stress;Redox-dependent_regulation_of_nucleus_processes;NAD-dependent deacetylase;NAD-dependent deacetylase	1	1	1	1	1	1	1	1
SEED;Stress Response;Oxidative stress;Glutathionylspermidine_and_Trypanothione;Similarity with glutathionylspermidine synthase (EC 6.3.1.8), group 1;Similarity with glutathionylspermidine synthase (EC 6.3.1.8), group 1	1	1	1	1	1	1	1	1
SEED;Stress Response;Oxidative stress;Glutathione:_Non-redox_reactions;Glutathione S-transferase, omega (EC 2.5.1.18);Glutathione S-transferase, omega (EC 2.5.1.18)	1	1	1	1	1	1	1	1
SEED;Stress Response;Oxidative stress;Glutathione:_Non-redox_reactions;Glutathione S-transferase, unnamed subgroup 2 (EC 2.5.1.18);Glutathione S-transferase, unnamed subgroup 2 (EC 2.5.1.18)	0	0	1	0	1	1	1	1
SEED;Stress Response;Oxidative stress;Glutathione:_Non-redox_reactions;Probable glutathione S-transferase (EC 2.5.1.18), YfcG homolog;Probable glutathione S-transferase (EC 2.5.1.18), YfcG homolog	1	1	1	1	1	1	1	1
SEED;Stress Response;Oxidative stress;Glutathione:_Non-redox_reactions;Uncharacterized GST-like protein yncG;Uncharacterized GST-like protein yncG	1	1	1	1	1	1	1	1
SEED;Stress Response;Oxidative stress;Glutathione:_Non-redox_reactions;Uncharacterized GST-like protein yibF;Uncharacterized GST-like protein yibF	1	1	1	1	1	1	1	1
SEED;Stress Response;Osmotic stress;Choline_and_Betaine_Uptake_and_Betaine_Biosynthesis;Choline dehydrogenase (EC 1.1.99.1);Choline dehydrogenase (EC 1.1.99.1)	1	1	1	1	1	1	1	1
SEED;Stress Response;Osmotic stress;Choline_and_Betaine_Uptake_and_Betaine_Biosynthesis;Betaine aldehyde dehydrogenase (EC 1.2.1.8);Betaine aldehyde dehydrogenase (EC 1.2.1.8)	1	1	1	1	1	1	1	1
SEED;Stress Response;Osmotic stress;Choline_and_Betaine_Uptake_and_Betaine_Biosynthesis;High-affinity choline uptake protein BetT;High-affinity choline uptake protein BetT	1	1	1	1	1	1	1	1
SEED;Stress Response;Osmotic stress;Choline_and_Betaine_Uptake_and_Betaine_Biosynthesis;HTH-type transcriptional regulator BetI;HTH-type transcriptional regulator BetI	1	1	1	1	1	1	1	1
SEED;Stress Response;Universal_stress_protein_family;Universal stress protein A;Universal stress protein A	1	1	1	2	1	1	1	1
SEED;Stress Response;Universal_stress_protein_family;Universal stress protein C;Universal stress protein C	1	1	1	1	1	1	1	1
SEED;Stress Response;Universal_stress_protein_family;Universal stress protein B;Universal stress protein B	1	1	1	1	1	1	1	1
SEED;Stress Response;Universal_stress_protein_family;Universal stress protein E;Universal stress protein E	1	1	1	1	1	1	1	1
SEED;Stress Response;Universal_stress_protein_family;Universal stress protein F;Universal stress protein F	0	0	1	1	1	1	1	1
SEED;Stress Response;Universal_stress_protein_family;Universal stress protein family;Universal stress protein family	0	0	0	1	1	1	1	1
SEED;Stress Response;Bacterial_hemoglobins;Flavohemoprotein;Flavohemoprotein	1	1	1	1	1	1	1	1
SEED;Stress Response;Heat_shock_dnaK_gene_cluster_extended;UPF0269 protein yggX;UPF0269 protein yggX	1	1	1	1	1	1	1	1
SEED;Stress Response;Heat_shock_dnaK_gene_cluster_extended;Tetrapyrrole (Corrin-Porphyrin) methylase family protein UPF0011;Tetrapyrrole (Corrin-Porphyrin) methylase family protein UPF0011	1	1	1	1	1	1	1	1
SEED;Stress Response;Heat_shock_dnaK_gene_cluster_extended;Ribonuclease PH (EC 2.7.7.56);Ribonuclease PH (EC 2.7.7.56)	1	1	1	1	1	1	1	1
SEED;Stress Response;Heat_shock_dnaK_gene_cluster_extended;Nucleoside 5-triphosphatase RdgB (dHAPTP, dITP, XTP-specific) (EC 3.6.1.15);Nucleoside 5-triphosphatase RdgB (dHAPTP, dITP, XTP-specific) (EC 3.6.1.15)	1	1	1	1	1	1	1	1
SEED;Stress Response;Heat_shock_dnaK_gene_cluster_extended;Translation elongation factor LepA;Translation elongation factor LepA	1	1	1	1	1	1	1	1
SEED;Stress Response;Heat_shock_dnaK_gene_cluster_extended;Radical SAM family enzyme, similar to coproporphyrinogen III oxidase, oxygen-independent, clustered with nucleoside-triphosphatase RdgB;Radical SAM family enzyme, similar to coproporphyrinogen III oxidase, oxygen-independent, clustered with nucleoside-triphosphatase RdgB	1	1	1	1	1	1	1	1
SEED;Stress Response;Heat_shock_dnaK_gene_cluster_extended;Ribosomal RNA small subunit methyltransferase E (EC 2.1.1.-);Ribosomal RNA small subunit methyltransferase E (EC 2.1.1.-)	1	1	1	1	1	1	1	1
SEED;Stress Response;Heat_shock_dnaK_gene_cluster_extended;Ribosomal protein L11 methyltransferase (EC 2.1.1.-);Ribosomal protein L11 methyltransferase (EC 2.1.1.-)	1	1	1	1	1	1	1	1
SEED;Stress Response;Heat_shock_dnaK_gene_cluster_extended;Chaperone protein DnaJ;Chaperone protein DnaJ	1	1	1	1	1	1	1	1
SEED;Stress Response;Heat_shock_dnaK_gene_cluster_extended;Chaperone protein DnaK;Chaperone protein DnaK	1	1	1	1	1	1	1	1
SEED;Stress Response;Heat_shock_dnaK_gene_cluster_extended;Heat shock protein GrpE;Heat shock protein GrpE	1	1	1	1	1	1	1	1
SEED;Stress Response;Heat_shock_dnaK_gene_cluster_extended;tmRNA-binding protein SmpB;tmRNA-binding protein SmpB	1	1	1	1	1	1	1	1
SEED;Stress Response;Heat_shock_dnaK_gene_cluster_extended;Ribosome-associated heat shock protein implicated in the recycling of the 50S subunit (S4 paralog);Ribosome-associated heat shock protein implicated in the recycling of the 50S subunit (S4 paralog)	1	1	1	1	1	1	1	1
SEED;Stress Response;Heat_shock_dnaK_gene_cluster_extended;RNA polymerase sigma factor RpoH;RNA polymerase sigma factor RpoH	1	1	1	1	1	1	1	1
SEED;Stress Response;Detoxification;Glutathione-dependent_pathway_of_formaldehyde_detoxification;Glutathione-dependent_pathway_of_formaldehyde_detoxification	3	3	3	3	1	1	0.702896	1
SEED;Stress Response;Detoxification;Glutathione-dependent_pathway_of_formaldehyde_detoxification;S-(hydroxymethyl)glutathione dehydrogenase (EC 1.1.1.284);S-(hydroxymethyl)glutathione dehydrogenase (EC 1.1.1.284)	1	1	1	1	1	1	1	1
SEED;Stress Response;Detoxification;Glutathione-dependent_pathway_of_formaldehyde_detoxification;S-formylglutathione hydrolase (EC 3.1.2.12);S-formylglutathione hydrolase (EC 3.1.2.12)	1	1	1	1	1	1	1	1
SEED;Stress Response;Detoxification;Glutathione-dependent_pathway_of_formaldehyde_detoxification;Uncharacterized protein YaiN in in formaldehyde detoxification operon;Uncharacterized protein YaiN in in formaldehyde detoxification operon	1	1	1	1	1	1	1	1
SEED;Stress Response;Detoxification;D-tyrosyl-tRNA(Tyr)_deacylase;D-tyrosyl-tRNA(Tyr)_deacylase	1	1	1	1	1	1	1	1
SEED;Stress Response;Detoxification;D-tyrosyl-tRNA(Tyr)_deacylase;D-tyrosyl-tRNA(Tyr) deacylase;D-tyrosyl-tRNA(Tyr) deacylase	1	1	1	1	1	1	1	1
SEED;Stress Response;Hfl_operon;HflK protein;HflK protein	1	1	1	1	1	1	1	1
SEED;Stress Response;Hfl_operon;HflC protein;HflC protein	1	1	1	1	1	1	1	1
SEED;Stress Response;Hfl_operon;Putative inner membrane protein YjeT (clustered with HflC);Putative inner membrane protein YjeT (clustered with HflC)	1	0	1	1	1	1	1	1
SEED;Stress Response;Sugar-phosphate_stress_regulation;Sugar-phosphate_stress_regulation	1	1	1	1	1	1	1	1
SEED;Stress Response;Sugar-phosphate_stress_regulation;SgrR, sugar-phosphate stress, transcriptional activator of SgrS small RNA;SgrR, sugar-phosphate stress, transcriptional activator of SgrS small RNA	1	1	1	1	1	1	1	1
SEED;Protein Metabolism;Protein biosynthesis;tRNA_aminoacylation,_Glu_and_Gln;tRNA_aminoacylation,_Glu_and_Gln	2	2	3	2	1	1	1	1
SEED;Protein Metabolism;Protein biosynthesis;tRNA_aminoacylation,_Glu_and_Gln;Glutamyl-tRNA synthetase (EC 6.1.1.17);Glutamyl-tRNA synthetase (EC 6.1.1.17)	1	1	2	1	1	1	1	1
SEED;Protein Metabolism;Protein biosynthesis;tRNA_aminoacylation,_Glu_and_Gln;Glutaminyl-tRNA synthetase (EC 6.1.1.18);Glutaminyl-tRNA synthetase (EC 6.1.1.18)	1	1	1	1	1	1	1	1
SEED;Protein Metabolism;Protein biosynthesis;tRNA_aminoacylation,_Asp_and_Asn;tRNA_aminoacylation,_Asp_and_Asn	2	2	2	2	1	1	1	1
SEED;Protein Metabolism;Protein biosynthesis;tRNA_aminoacylation,_Asp_and_Asn;Aspartyl-tRNA synthetase (EC 6.1.1.12);Aspartyl-tRNA synthetase (EC 6.1.1.12)	1	1	1	1	1	1	1	1
SEED;Protein Metabolism;Protein biosynthesis;tRNA_aminoacylation,_Asp_and_Asn;Asparaginyl-tRNA synthetase (EC 6.1.1.22);Asparaginyl-tRNA synthetase (EC 6.1.1.22)	1	1	1	1	1	1	1	1
SEED;Protein Metabolism;Protein biosynthesis;Ribosome_SSU_bacterial;SSU ribosomal protein S1p;SSU ribosomal protein S1p	1	1	1	1	1	1	1	1
SEED;Protein Metabolism;Protein biosynthesis;Ribosome_SSU_bacterial;SSU ribosomal protein S3p (S3e);SSU ribosomal protein S3p (S3e)	1	1	1	1	1	1	1	1
SEED;Protein Metabolism;Protein biosynthesis;Ribosome_SSU_bacterial;SSU ribosomal protein S4p (S9e);SSU ribosomal protein S4p (S9e)	1	1	1	1	1	1	1	1
SEED;Protein Metabolism;Protein biosynthesis;Ribosome_SSU_bacterial;SSU ribosomal protein S5p (S2e);SSU ribosomal protein S5p (S2e)	1	1	2	1	1	1	1	1
SEED;Protein Metabolism;Protein biosynthesis;Ribosome_SSU_bacterial;SSU ribosomal protein S6p;SSU ribosomal protein S6p	1	1	1	1	1	1	1	1
SEED;Protein Metabolism;Protein biosynthesis;Ribosome_SSU_bacterial;SSU ribosomal protein S7p (S5e);SSU ribosomal protein S7p (S5e)	1	1	1	1	1	1	1	1
SEED;Protein Metabolism;Protein biosynthesis;Ribosome_SSU_bacterial;SSU ribosomal protein S8p (S15Ae);SSU ribosomal protein S8p (S15Ae)	1	1	1	1	1	1	1	1
SEED;Protein Metabolism;Protein biosynthesis;Ribosome_SSU_bacterial;SSU ribosomal protein S9p (S16e);SSU ribosomal protein S9p (S16e)	1	1	1	1	1	1	1	1
SEED;Protein Metabolism;Protein biosynthesis;Ribosome_SSU_bacterial;SSU ribosomal protein S10p (S20e);SSU ribosomal protein S10p (S20e)	1	1	1	1	1	1	1	1
SEED;Protein Metabolism;Protein biosynthesis;Ribosome_SSU_bacterial;SSU ribosomal protein S11p (S14e);SSU ribosomal protein S11p (S14e)	1	1	1	1	1	1	1	1
SEED;Protein Metabolism;Protein biosynthesis;Ribosome_SSU_bacterial;SSU ribosomal protein S12p (S23e);SSU ribosomal protein S12p (S23e)	1	1	1	1	1	1	1	1
SEED;Protein Metabolism;Protein biosynthesis;Ribosome_SSU_bacterial;SSU ribosomal protein S13p (S18e);SSU ribosomal protein S13p (S18e)	1	1	1	1	1	1	1	1
SEED;Protein Metabolism;Protein biosynthesis;Ribosome_SSU_bacterial;SSU ribosomal protein S14p (S29e);SSU ribosomal protein S14p (S29e)	1	1	1	1	1	1	1	1
SEED;Protein Metabolism;Protein biosynthesis;Ribosome_SSU_bacterial;SSU ribosomal protein S15p (S13e);SSU ribosomal protein S15p (S13e)	1	1	1	1	1	1	1	1
SEED;Protein Metabolism;Protein biosynthesis;Ribosome_SSU_bacterial;SSU ribosomal protein S16p;SSU ribosomal protein S16p	1	1	1	1	1	1	1	1
SEED;Protein Metabolism;Protein biosynthesis;Ribosome_SSU_bacterial;SSU ribosomal protein S17p (S11e);SSU ribosomal protein S17p (S11e)	1	1	1	1	1	1	1	1
SEED;Protein Metabolism;Protein biosynthesis;Ribosome_SSU_bacterial;SSU ribosomal protein S18p;SSU ribosomal protein S18p	1	1	1	1	1	1	1	1
SEED;Protein Metabolism;Protein biosynthesis;Ribosome_SSU_bacterial;SSU ribosomal protein S19p (S15e);SSU ribosomal protein S19p (S15e)	1	1	1	1	1	1	1	1
SEED;Protein Metabolism;Protein biosynthesis;Ribosome_SSU_bacterial;SSU ribosomal protein S20p;SSU ribosomal protein S20p	1	1	1	1	1	1	1	1
SEED;Protein Metabolism;Protein biosynthesis;Ribosome_SSU_bacterial;SSU ribosomal protein S21p;SSU ribosomal protein S21p	1	1	1	1	1	1	1	1
SEED;Protein Metabolism;Protein biosynthesis;Translation_elongation_factors_eukaryotic_and_archaeal;Translation_elongation_factors_eukaryotic_and_archaeal	1	1	1	1	1	1	1	1
SEED;Protein Metabolism;Protein biosynthesis;Translation_elongation_factors_eukaryotic_and_archaeal;Translation elongation factor P;Translation elongation factor P	1	1	1	1	1	1	1	1
SEED;Protein Metabolism;Protein biosynthesis;Translation_elongation_factor_G_family;Translation_elongation_factor_G_family	2	2	2	2	1	1	1	1
SEED;Protein Metabolism;Protein biosynthesis;Translation_elongation_factor_G_family;Translation elongation factor G;Translation elongation factor G	2	2	2	2	1	1	1	1
SEED;Protein Metabolism;Protein biosynthesis;Ribosome_LSU_bacterial;LSU ribosomal protein L1p (L10Ae);LSU ribosomal protein L1p (L10Ae)	1	1	1	1	1	1	1	1
SEED;Protein Metabolism;Protein biosynthesis;Ribosome_LSU_bacterial;LSU ribosomal protein L2p (L8e);LSU ribosomal protein L2p (L8e)	1	1	1	1	1	1	1	1
SEED;Protein Metabolism;Protein biosynthesis;Ribosome_LSU_bacterial;LSU ribosomal protein L3p (L3e);LSU ribosomal protein L3p (L3e)	1	1	2	1	1	1	1	1
SEED;Protein Metabolism;Protein biosynthesis;Ribosome_LSU_bacterial;LSU ribosomal protein L4p (L1e);LSU ribosomal protein L4p (L1e)	1	1	1	1	1	1	1	1
SEED;Protein Metabolism;Protein biosynthesis;Ribosome_LSU_bacterial;LSU ribosomal protein L5p (L11e);LSU ribosomal protein L5p (L11e)	1	1	1	1	1	1	1	1
SEED;Protein Metabolism;Protein biosynthesis;Ribosome_LSU_bacterial;LSU ribosomal protein L6p (L9e);LSU ribosomal protein L6p (L9e)	1	1	1	1	1	1	1	1
SEED;Protein Metabolism;Protein biosynthesis;Ribosome_LSU_bacterial;LSU ribosomal protein L9p;LSU ribosomal protein L9p	1	1	1	1	1	1	1	1
SEED;Protein Metabolism;Protein biosynthesis;Ribosome_LSU_bacterial;LSU ribosomal protein L10p (P0);LSU ribosomal protein L10p (P0)	1	1	1	1	1	1	1	1
SEED;Protein Metabolism;Protein biosynthesis;Ribosome_LSU_bacterial;LSU ribosomal protein L11p (L12e);LSU ribosomal protein L11p (L12e)	1	1	1	1	1	1	1	1
SEED;Protein Metabolism;Protein biosynthesis;Ribosome_LSU_bacterial;LSU ribosomal protein L13p (L13Ae);LSU ribosomal protein L13p (L13Ae)	1	1	1	1	1	1	1	1
SEED;Protein Metabolism;Protein biosynthesis;Ribosome_LSU_bacterial;LSU ribosomal protein L14p (L23e);LSU ribosomal protein L14p (L23e)	1	1	1	1	1	1	1	1
SEED;Protein Metabolism;Protein biosynthesis;Ribosome_LSU_bacterial;LSU ribosomal protein L15p (L27Ae);LSU ribosomal protein L15p (L27Ae)	1	1	1	1	1	1	1	1
SEED;Protein Metabolism;Protein biosynthesis;Ribosome_LSU_bacterial;LSU ribosomal protein L16p (L10e);LSU ribosomal protein L16p (L10e)	1	1	1	1	1	1	1	1
SEED;Protein Metabolism;Protein biosynthesis;Ribosome_LSU_bacterial;LSU ribosomal protein L17p;LSU ribosomal protein L17p	1	1	1	1	1	1	1	1
SEED;Protein Metabolism;Protein biosynthesis;Ribosome_LSU_bacterial;LSU ribosomal protein L18p (L5e);LSU ribosomal protein L18p (L5e)	1	1	1	1	1	1	1	1
SEED;Protein Metabolism;Protein biosynthesis;Ribosome_LSU_bacterial;LSU ribosomal protein L19p;LSU ribosomal protein L19p	1	1	1	1	1	1	1	1
SEED;Protein Metabolism;Protein biosynthesis;Ribosome_LSU_bacterial;LSU ribosomal protein L20p;LSU ribosomal protein L20p	1	1	1	1	1	1	1	1
SEED;Protein Metabolism;Protein biosynthesis;Ribosome_LSU_bacterial;LSU ribosomal protein L21p;LSU ribosomal protein L21p	1	1	1	1	1	1	1	1
SEED;Protein Metabolism;Protein biosynthesis;Ribosome_LSU_bacterial;LSU ribosomal protein L22p (L17e);LSU ribosomal protein L22p (L17e)	1	1	1	1	1	1	1	1
SEED;Protein Metabolism;Protein biosynthesis;Ribosome_LSU_bacterial;LSU ribosomal protein L23p (L23Ae);LSU ribosomal protein L23p (L23Ae)	1	1	1	1	1	1	1	1
SEED;Protein Metabolism;Protein biosynthesis;Ribosome_LSU_bacterial;LSU ribosomal protein L24p (L26e);LSU ribosomal protein L24p (L26e)	1	1	1	1	1	1	1	1
SEED;Protein Metabolism;Protein biosynthesis;Ribosome_LSU_bacterial;LSU ribosomal protein L25p;LSU ribosomal protein L25p	1	1	1	1	1	1	1	1
SEED;Protein Metabolism;Protein biosynthesis;Ribosome_LSU_bacterial;LSU ribosomal protein L27p;LSU ribosomal protein L27p	1	1	1	1	1	1	1	1
SEED;Protein Metabolism;Protein biosynthesis;Ribosome_LSU_bacterial;LSU ribosomal protein L28p;LSU ribosomal protein L28p	1	1	1	1	1	1	1	1
SEED;Protein Metabolism;Protein biosynthesis;Ribosome_LSU_bacterial;LSU ribosomal protein L29p (L35e);LSU ribosomal protein L29p (L35e)	1	1	1	1	1	1	1	1
SEED;Protein Metabolism;Protein biosynthesis;Ribosome_LSU_bacterial;LSU ribosomal protein L30p (L7e);LSU ribosomal protein L30p (L7e)	1	1	1	1	1	1	1	1
SEED;Protein Metabolism;Protein biosynthesis;Ribosome_LSU_bacterial;LSU ribosomal protein L31p;LSU ribosomal protein L31p	2	2	2	2	1	1	1	1
SEED;Protein Metabolism;Protein biosynthesis;Ribosome_LSU_bacterial;LSU ribosomal protein L32p;LSU ribosomal protein L32p	1	1	1	1	1	1	1	1
SEED;Protein Metabolism;Protein biosynthesis;Ribosome_LSU_bacterial;LSU ribosomal protein L33p;LSU ribosomal protein L33p	1	1	1	1	1	1	1	1
SEED;Protein Metabolism;Protein biosynthesis;Ribosome_LSU_bacterial;LSU ribosomal protein L34p;LSU ribosomal protein L34p	0	0	1	1	1	1	1	1
SEED;Protein Metabolism;Protein biosynthesis;Ribosome_LSU_bacterial;LSU ribosomal protein L35p;LSU ribosomal protein L35p	1	1	1	1	1	1	1	1
SEED;Protein Metabolism;Protein biosynthesis;Ribosome_activity_modulation;Ribosome_activity_modulation	3	3	3	4	1	1	1	1
SEED;Protein Metabolism;Protein biosynthesis;Ribosome_activity_modulation;Ribosome modulation factor;Ribosome modulation factor	0	0	0	1	1	1	1	1
SEED;Protein Metabolism;Protein biosynthesis;Ribosome_activity_modulation;Stationary-phase-induced ribosome-associated protein;Stationary-phase-induced ribosome-associated protein	1	1	1	1	1	1	1	1
SEED;Protein Metabolism;Protein biosynthesis;Ribosome_activity_modulation;Ribosomal subunit interface protein;Ribosomal subunit interface protein	1	1	1	2	1	1	1	1
SEED;Protein Metabolism;Protein biosynthesis;Programmed_frameshift;Programmed_frameshift	1	1	1	2	1	1	1	1
SEED;Protein Metabolism;Protein biosynthesis;Programmed_frameshift;Peptide chain release factor 2;Peptide chain release factor 2	1	1	1	2	1	1	1	1
SEED;Protein Metabolism;Protein biosynthesis;Translation_initiation_factors_eukaryotic_and_archaeal;Translation initiation factor SUI1-related protein;Translation initiation factor SUI1-related protein	0	0	1	0	1	1	1	1
SEED;Protein Metabolism;Protein biosynthesis;Ribosome_biogenesis_bacterial;Ribosomal-protein-S18p-alanine acetyltransferase (EC 2.3.1.-);Ribosomal-protein-S18p-alanine acetyltransferase (EC 2.3.1.-)	1	1	1	2	1	1	1	1
SEED;Protein Metabolism;Protein biosynthesis;Ribosome_biogenesis_bacterial;Inactive homolog of metal-dependent proteases, putative molecular chaperone;Inactive homolog of metal-dependent proteases, putative molecular chaperone	1	1	1	1	1	1	1	1
SEED;Protein Metabolism;Protein biosynthesis;Ribosome_biogenesis_bacterial;Ribosomal-protein-L7p-serine acetyltransferase;Ribosomal-protein-L7p-serine acetyltransferase	1	1	1	1	1	1	1	1
SEED;Protein Metabolism;Protein biosynthesis;Ribosome_biogenesis_bacterial;Ribosomal protein L11 methyltransferase (EC 2.1.1.-);Ribosomal protein L11 methyltransferase (EC 2.1.1.-)	1	1	1	1	1	1	1	1
SEED;Protein Metabolism;Protein biosynthesis;Ribosome_biogenesis_bacterial;16S rRNA processing protein RimM;16S rRNA processing protein RimM	1	1	1	1	1	1	1	1
SEED;Protein Metabolism;Protein biosynthesis;Ribosome_biogenesis_bacterial;Ribosomal large subunit pseudouridine synthase A (EC 4.2.1.70);Ribosomal large subunit pseudouridine synthase A (EC 4.2.1.70)	2	2	2	2	1	1	1	1
SEED;Protein Metabolism;Protein biosynthesis;Ribosome_biogenesis_bacterial;Ribosomal large subunit pseudouridine synthase C (EC 4.2.1.70);Ribosomal large subunit pseudouridine synthase C (EC 4.2.1.70)	1	1	1	1	1	1	1	1
SEED;Protein Metabolism;Protein biosynthesis;Ribosome_biogenesis_bacterial;Ribosomal large subunit pseudouridine synthase D (EC 4.2.1.70);Ribosomal large subunit pseudouridine synthase D (EC 4.2.1.70)	1	1	1	1	1	1	1	1
SEED;Protein Metabolism;Protein biosynthesis;Ribosome_biogenesis_bacterial;LSU m3Psi1915 methyltransferase RlmH;LSU m3Psi1915 methyltransferase RlmH	1	1	1	1	1	1	1	1
SEED;Protein Metabolism;Protein biosynthesis;Ribosome_biogenesis_bacterial;LSU m5C1962 methyltransferase RlmI;LSU m5C1962 methyltransferase RlmI	1	1	1	1	1	1	1	1
SEED;Protein Metabolism;Protein biosynthesis;Ribosome_biogenesis_bacterial;Dimethyladenosine transferase (EC 2.1.1.-);Dimethyladenosine transferase (EC 2.1.1.-)	1	1	1	1	1	1	1	1
SEED;Protein Metabolism;Protein biosynthesis;Universal_GTPases;Translation elongation factor G;Translation elongation factor G	2	2	2	2	1	1	1	1
SEED;Protein Metabolism;Protein biosynthesis;Universal_GTPases;GTP-binding protein TypA/BipA;GTP-binding protein TypA/BipA	1	1	1	1	1	1	1	1
SEED;Protein Metabolism;Protein biosynthesis;Universal_GTPases;Signal recognition particle, subunit Ffh SRP54 (TC 3.A.5.1.1);Signal recognition particle, subunit Ffh SRP54 (TC 3.A.5.1.1)	1	1	1	1	1	1	1	1
SEED;Protein Metabolism;Protein biosynthesis;Universal_GTPases;Signal recognition particle receptor protein FtsY (=alpha subunit) (TC 3.A.5.1.1);Signal recognition particle receptor protein FtsY (=alpha subunit) (TC 3.A.5.1.1)	1	1	1	1	1	1	1	1
SEED;Protein Metabolism;Protein biosynthesis;Universal_GTPases;GTP-binding protein EngB;GTP-binding protein EngB	1	1	1	1	1	1	1	1
SEED;Protein Metabolism;Protein biosynthesis;Universal_GTPases;Ribosome small subunit-stimulated GTPase EngC;Ribosome small subunit-stimulated GTPase EngC	1	1	1	1	1	1	1	1
SEED;Protein Metabolism;Protein biosynthesis;Universal_GTPases;Translation elongation factor LepA;Translation elongation factor LepA	1	1	1	1	1	1	1	1
SEED;Protein Metabolism;Protein biosynthesis;Universal_GTPases;COG0536: GTP-binding protein Obg;COG0536: GTP-binding protein Obg	1	1	2	1	1	1	1	1
SEED;Protein Metabolism;Protein biosynthesis;Universal_GTPases;GTPase and tRNA-U34 5-formylation enzyme TrmE;GTPase and tRNA-U34 5-formylation enzyme TrmE	1	1	1	1	1	1	1	1
SEED;Protein Metabolism;Protein biosynthesis;Universal_GTPases;GTP-binding and nucleic acid-binding protein YchF;GTP-binding and nucleic acid-binding protein YchF	1	1	1	1	1	1	1	1
SEED;Protein Metabolism;Protein biosynthesis;Trans-translation_by_stalled_ribosomes;Trans-translation_by_stalled_ribosomes	1	1	1	1	1	1	1	1
SEED;Protein Metabolism;Protein biosynthesis;Trans-translation_by_stalled_ribosomes;tmRNA-binding protein SmpB;tmRNA-binding protein SmpB	1	1	1	1	1	1	1	1
SEED;Protein Metabolism;Protein degradation;Protein_degradation;Leucyl/phenylalanyl-tRNA--protein transferase (EC 2.3.2.6);Leucyl/phenylalanyl-tRNA--protein transferase (EC 2.3.2.6)	1	1	1	1	1	1	1	1
SEED;Protein Metabolism;Protein degradation;Protein_degradation;Oligopeptidase A (EC 3.4.24.70);Oligopeptidase A (EC 3.4.24.70)	1	1	1	1	1	1	1	1
SEED;Protein Metabolism;Protein degradation;Proteolysis_in_bacteria,_ATP-dependent;ATP-dependent Clp protease ATP-binding subunit ClpX;ATP-dependent Clp protease ATP-binding subunit ClpX	1	1	1	1	1	1	1	1
SEED;Protein Metabolism;Protein degradation;Proteolysis_in_bacteria,_ATP-dependent;ATP-dependent Clp protease adaptor protein ClpS;ATP-dependent Clp protease adaptor protein ClpS	1	1	1	1	1	1	1	1
SEED;Protein Metabolism;Protein degradation;Proteolysis_in_bacteria,_ATP-dependent;ATP-dependent Clp protease ATP-binding subunit ClpA;ATP-dependent Clp protease ATP-binding subunit ClpA	1	1	1	1	1	1	1	1
SEED;Protein Metabolism;Protein degradation;Proteolysis_in_bacteria,_ATP-dependent;ATP-dependent hsl protease ATP-binding subunit HslU;ATP-dependent hsl protease ATP-binding subunit HslU	1	1	1	1	1	1	1	1
SEED;Protein Metabolism;Protein degradation;Proteolysis_in_bacteria,_ATP-dependent;ATP-dependent protease HslV (EC 3.4.25.-);ATP-dependent protease HslV (EC 3.4.25.-)	1	1	1	1	1	1	1	1
SEED;Protein Metabolism;Protein degradation;Proteolysis_in_bacteria,_ATP-dependent;ATP-dependent protease La (EC 3.4.21.53) Type I;ATP-dependent protease La (EC 3.4.21.53) Type I	1	1	1	1	1	1	1	1
SEED;Protein Metabolism;Protein degradation;Proteolysis_in_bacteria,_ATP-dependent;ATP-dependent protease La (EC 3.4.21.53) Type II;ATP-dependent protease La (EC 3.4.21.53) Type II	1	1	1	1	1	1	1	1
SEED;Protein Metabolism;Protein degradation;Proteolysis_in_bacteria,_ATP-dependent;ClpXP protease specificity-enhancing factor;ClpXP protease specificity-enhancing factor	1	1	1	1	1	1	1	1
SEED;Protein Metabolism;Protein degradation;Proteolysis_in_bacteria,_ATP-dependent;Outer membrane stress sensor protease DegS;Outer membrane stress sensor protease DegS	1	1	1	1	1	1	1	1
SEED;Protein Metabolism;Protein degradation;Proteolysis_in_bacteria,_ATP-dependent;Outer membrane stress sensor protease DegQ, serine protease;Outer membrane stress sensor protease DegQ, serine protease	1	1	1	1	1	1	1	1
SEED;Protein Metabolism;Protein degradation;Proteolysis_in_bacteria,_ATP-dependent;ATPase, AFG1 family;ATPase, AFG1 family	1	1	1	1	1	1	1	1
SEED;Protein Metabolism;Protein degradation;Putative_TldE-TldD_proteolytic_complex;Putative_TldE-TldD_proteolytic_complex	3	3	3	3	1	1	0.702896	1
SEED;Protein Metabolism;Protein degradation;Putative_TldE-TldD_proteolytic_complex;FIG138315: Putative alpha helix protein;FIG138315: Putative alpha helix protein	1	1	1	1	1	1	1	1
SEED;Protein Metabolism;Protein degradation;Putative_TldE-TldD_proteolytic_complex;TldE/PmbA protein, part of proposed TldE/TldD proteolytic complex (PMID 12029038);TldE/PmbA protein, part of proposed TldE/TldD proteolytic complex (PMID 12029038)	1	1	1	1	1	1	1	1
SEED;Protein Metabolism;Protein degradation;Putative_TldE-TldD_proteolytic_complex;TldD protein, part of proposed TldE/TldD proteolytic complex (PMID 12029038);TldD protein, part of proposed TldE/TldD proteolytic complex (PMID 12029038)	1	1	1	1	1	1	1	1
SEED;Protein Metabolism;Protein degradation;Proteasome_bacterial;ATP-dependent hsl protease ATP-binding subunit HslU;ATP-dependent hsl protease ATP-binding subunit HslU	1	1	1	1	1	1	1	1
SEED;Protein Metabolism;Protein degradation;Proteasome_bacterial;ATP-dependent protease HslV (EC 3.4.25.-);ATP-dependent protease HslV (EC 3.4.25.-)	1	1	1	1	1	1	1	1
SEED;Protein Metabolism;Protein degradation;Proteasome_bacterial;ATP-dependent Clp protease ATP-binding subunit ClpX;ATP-dependent Clp protease ATP-binding subunit ClpX	1	1	1	1	1	1	1	1
SEED;Protein Metabolism;Protein processing and modification;Ribosomal_protein_S12p_Asp_methylthiotransferase;Ribosomal_protein_S12p_Asp_methylthiotransferase	3	3	3	3	1	1	0.702896	1
SEED;Protein Metabolism;Protein processing and modification;Ribosomal_protein_S12p_Asp_methylthiotransferase;SSU ribosomal protein S12p (S23e);SSU ribosomal protein S12p (S23e)	1	1	1	1	1	1	1	1
SEED;Protein Metabolism;Protein processing and modification;Ribosomal_protein_S12p_Asp_methylthiotransferase;Ribosomal protein S12p Asp88 (E. coli) methylthiotransferase;Ribosomal protein S12p Asp88 (E. coli) methylthiotransferase	1	1	1	1	1	1	1	1
SEED;Protein Metabolism;Protein processing and modification;Ribosomal_protein_S12p_Asp_methylthiotransferase;tRNA-i(6)A37 methylthiotransferase;tRNA-i(6)A37 methylthiotransferase	1	1	1	1	1	1	1	1
SEED;Protein Metabolism;Protein processing and modification;Ribosomal_protein_S5p_acylation;SSU ribosomal protein S5p (S2e);SSU ribosomal protein S5p (S2e)	1	1	2	1	1	1	1	1
SEED;Protein Metabolism;Secretion;Twin-arginine_translocation_system;Twin-arginine translocation protein TatA;Twin-arginine translocation protein TatA	1	1	1	1	1	1	1	1
SEED;Protein Metabolism;Secretion;Twin-arginine_translocation_system;Twin-arginine translocation protein TatB;Twin-arginine translocation protein TatB	1	1	1	1	1	1	1	1
SEED;Protein Metabolism;Secretion;Twin-arginine_translocation_system;Twin-arginine translocation protein TatC;Twin-arginine translocation protein TatC	1	1	1	1	1	1	1	1
SEED;Protein Metabolism;Secretion;Twin-arginine_translocation_system;Twin-arginine translocation protein TatE;Twin-arginine translocation protein TatE	1	1	1	1	1	1	1	1
SEED;Protein Metabolism;Secretion;Twin-arginine_translocation_system;Deoxyribonuclease TatD;Deoxyribonuclease TatD	1	1	1	1	1	1	1	1
SEED;Protein Metabolism;Secretion;Protein_secretion_by_ABC-type_exporters;ABC exporter for hemopore HasA, membrane fusion protein (MFP) family component HasE;ABC exporter for hemopore HasA, membrane fusion protein (MFP) family component HasE	0	0	0	1	1	1	1	1
SEED;Protein Metabolism;Secretion;Protein_secretion_by_ABC-type_exporters;ABC exporter for hemopore HasA, outer membrane component HasF;ABC exporter for hemopore HasA, outer membrane component HasF	0	0	0	1	1	1	1	1
SEED;Protein Metabolism;Secretion;Protein_secretion_by_ABC-type_exporters;ABC-type protease exporter, ATP-binding component PrtD/AprD;ABC-type protease exporter, ATP-binding component PrtD/AprD	0	0	0	1	1	1	1	1
SEED;Protein Metabolism;Protein folding;Protein_chaperones;Chaperone protein DnaJ;Chaperone protein DnaJ	1	1	1	1	1	1	1	1
SEED;Protein Metabolism;Protein folding;Protein_chaperones;Chaperone protein DnaK;Chaperone protein DnaK	1	1	1	1	1	1	1	1
SEED;Protein Metabolism;Protein folding;Protein_chaperones;Heat shock protein GrpE;Heat shock protein GrpE	1	1	1	1	1	1	1	1
SEED;Protein Metabolism;Protein folding;Protein_chaperones;Chaperone protein HscA;Chaperone protein HscA	1	1	1	1	1	1	1	1
SEED;Protein Metabolism;Protein folding;Protein_chaperones;Chaperone protein HscB;Chaperone protein HscB	1	1	1	1	1	1	1	1
SEED;Protein Metabolism;Protein folding;Protein_chaperones;Chaperone protein HtpG;Chaperone protein HtpG	1	1	1	1	1	1	1	1
SEED;Protein Metabolism;Protein folding;Periplasmic_disulfide_interchange;Periplasmic_disulfide_interchange	4	5	5	6	1	1	1	1
SEED;Protein Metabolism;Protein folding;Periplasmic_disulfide_interchange;Periplasmic thiol:disulfide interchange protein DsbA;Periplasmic thiol:disulfide interchange protein DsbA	1	1	2	2	1	1	1	1
SEED;Protein Metabolism;Protein folding;Periplasmic_disulfide_interchange;Periplasmic thiol:disulfide oxidoreductase DsbB, required for DsbA reoxidation;Periplasmic thiol:disulfide oxidoreductase DsbB, required for DsbA reoxidation	1	1	1	1	1	1	1	1
SEED;Protein Metabolism;Protein folding;Periplasmic_disulfide_interchange;Thiol:disulfide interchange protein DsbC;Thiol:disulfide interchange protein DsbC	1	1	1	2	1	1	1	1
SEED;Protein Metabolism;Protein folding;Periplasmic_disulfide_interchange;Thiol:disulfide interchange protein DsbG precursor;Thiol:disulfide interchange protein DsbG precursor	1	1	1	1	1	1	1	1
SEED;Protein Metabolism;Protein folding;Peptidyl-prolyl_cis-trans_isomerase;Peptidyl-prolyl cis-trans isomerase ppiA precursor (EC 5.2.1.8);Peptidyl-prolyl cis-trans isomerase ppiA precursor (EC 5.2.1.8)	1	1	1	1	1	1	1	1
SEED;Protein Metabolism;Protein folding;Peptidyl-prolyl_cis-trans_isomerase;Peptidyl-prolyl cis-trans isomerase ppiB (EC 5.2.1.8);Peptidyl-prolyl cis-trans isomerase ppiB (EC 5.2.1.8)	1	1	1	1	1	1	1	1
SEED;Protein Metabolism;Protein folding;Peptidyl-prolyl_cis-trans_isomerase;Peptidyl-prolyl cis-trans isomerase ppiD (EC 5.2.1.8);Peptidyl-prolyl cis-trans isomerase ppiD (EC 5.2.1.8)	1	1	1	1	1	1	1	1
SEED;Protein Metabolism;Protein folding;Peptidyl-prolyl_cis-trans_isomerase;Survival protein SurA precursor (Peptidyl-prolyl cis-trans isomerase SurA) (EC 5.2.1.8);Survival protein SurA precursor (Peptidyl-prolyl cis-trans isomerase SurA) (EC 5.2.1.8)	1	1	1	1	1	1	1	1
SEED;Protein Metabolism;Protein folding;Peptidyl-prolyl_cis-trans_isomerase;FKBP-type peptidyl-prolyl cis-trans isomerase slpA (EC 5.2.1.8);FKBP-type peptidyl-prolyl cis-trans isomerase slpA (EC 5.2.1.8)	1	1	1	1	1	1	1	1
SEED;Protein Metabolism;Protein folding;Peptidyl-prolyl_cis-trans_isomerase;FKBP-type peptidyl-prolyl cis-trans isomerase fklB (EC 5.2.1.8);FKBP-type peptidyl-prolyl cis-trans isomerase fklB (EC 5.2.1.8)	1	1	1	1	1	1	1	1
SEED;Protein Metabolism;Protein folding;GroEL_GroES;GroEL_GroES	2	2	2	2	1	1	1	1
SEED;Protein Metabolism;Protein folding;GroEL_GroES;Heat shock protein 60 family chaperone GroEL;Heat shock protein 60 family chaperone GroEL	1	1	1	1	1	1	1	1
SEED;Protein Metabolism;Protein folding;GroEL_GroES;Heat shock protein 60 family co-chaperone GroES;Heat shock protein 60 family co-chaperone GroES	1	1	1	1	1	1	1	1
SEED;Protein Metabolism;Selenoproteins;Selenocysteine_metabolism;L-seryl-tRNA(Sec) selenium transferase (EC 2.9.1.1);L-seryl-tRNA(Sec) selenium transferase (EC 2.9.1.1)	1	1	1	1	1	1	1	1
SEED;Protein Metabolism;Selenoproteins;Selenocysteine_metabolism;Selenocysteine-specific translation elongation factor;Selenocysteine-specific translation elongation factor	1	1	1	1	1	1	1	1
SEED;Protein Metabolism;Selenoproteins;Selenocysteine_metabolism;Selenophosphate-dependent tRNA 2-selenouridine synthase;Selenophosphate-dependent tRNA 2-selenouridine synthase	1	1	1	1	1	1	1	1
SEED;RNA Metabolism;Transcription;Rrf2_family_transcriptional_regulators;Nitrite-sensitive transcriptional repressor NsrR;Nitrite-sensitive transcriptional repressor NsrR	1	1	1	1	1	1	1	1
SEED;RNA Metabolism;Transcription;Rrf2_family_transcriptional_regulators;Iron-sulfur cluster regulator IscR;Iron-sulfur cluster regulator IscR	1	1	1	1	1	1	1	1
SEED;RNA Metabolism;Transcription;RNA_polymerase_bacterial;DNA-directed RNA polymerase beta' subunit (EC 2.7.7.6);DNA-directed RNA polymerase beta' subunit (EC 2.7.7.6)	1	1	1	1	1	1	1	1
SEED;RNA Metabolism;Transcription;RNA_polymerase_bacterial;DNA-directed RNA polymerase beta subunit (EC 2.7.7.6);DNA-directed RNA polymerase beta subunit (EC 2.7.7.6)	1	1	1	1	1	1	1	1
SEED;RNA Metabolism;Transcription;RNA_polymerase_bacterial;DNA-directed RNA polymerase alpha subunit (EC 2.7.7.6);DNA-directed RNA polymerase alpha subunit (EC 2.7.7.6)	1	1	1	1	1	1	1	1
SEED;RNA Metabolism;Transcription;RNA_polymerase_bacterial;DNA-directed RNA polymerase omega subunit (EC 2.7.7.6);DNA-directed RNA polymerase omega subunit (EC 2.7.7.6)	1	1	1	1	1	1	1	1
SEED;RNA Metabolism;Transcription;Transcription_factors_cyanobacterial_RpoD-like_sigma_factors;Transcription_factors_cyanobacterial_RpoD-like_sigma_factors	1	1	1	1	1	1	1	1
SEED;RNA Metabolism;Transcription;Transcription_factors_cyanobacterial_RpoD-like_sigma_factors;RNA polymerase sigma factor RpoD;RNA polymerase sigma factor RpoD	1	1	1	1	1	1	1	1
SEED;RNA Metabolism;Transcription;Transcription_factors_bacterial;Regulator of nucleoside diphosphate kinase;Regulator of nucleoside diphosphate kinase	1	1	1	1	1	1	1	1
SEED;RNA Metabolism;Transcription;Transcription_factors_bacterial;Transcription elongation factor GreB;Transcription elongation factor GreB	1	1	1	1	1	1	1	1
SEED;RNA Metabolism;Transcription;Transcription_factors_bacterial;Transcription termination factor Rho;Transcription termination factor Rho	1	1	1	1	1	1	1	1
SEED;RNA Metabolism;Transcription;Transcription_factors_bacterial;COG0779: clustered with transcription termination protein NusA;COG0779: clustered with transcription termination protein NusA	1	1	1	1	1	1	1	1
SEED;RNA Metabolism;Transcription;Transcription_factors_bacterial;Transcription termination protein NusA;Transcription termination protein NusA	1	1	1	1	1	1	1	1
SEED;RNA Metabolism;Transcription;Transcription_factors_bacterial;Transcription termination protein NusB;Transcription termination protein NusB	1	1	1	1	1	1	1	1
SEED;RNA Metabolism;Transcription;Transcription_factors_bacterial;Transcription antitermination protein NusG;Transcription antitermination protein NusG	1	1	1	1	1	1	1	1
SEED;RNA Metabolism;Transcription;Transcription_factors_bacterial;Transcriptional activator RfaH;Transcriptional activator RfaH	1	1	1	1	1	1	1	1
SEED;RNA Metabolism;Transcription;Transcription_factors_bacterial;Transcription-repair coupling factor;Transcription-repair coupling factor	1	1	1	1	1	1	1	1
SEED;RNA Metabolism;Transcription;Transcription_initiation,_bacterial_sigma_factors;RNA polymerase sigma factor RpoD;RNA polymerase sigma factor RpoD	1	1	1	1	1	1	1	1
SEED;RNA Metabolism;Transcription;Transcription_initiation,_bacterial_sigma_factors;Sigma factor RpoE negative regulatory protein RseA;Sigma factor RpoE negative regulatory protein RseA	1	1	1	1	1	1	1	1
SEED;RNA Metabolism;Transcription;Transcription_initiation,_bacterial_sigma_factors;Sigma factor RpoE negative regulatory protein RseB precursor;Sigma factor RpoE negative regulatory protein RseB precursor	1	1	1	1	1	1	1	1
SEED;RNA Metabolism;Transcription;Transcription_initiation,_bacterial_sigma_factors;Sigma factor RpoE regulatory protein RseC;Sigma factor RpoE regulatory protein RseC	1	1	1	1	1	1	1	1
SEED;RNA Metabolism;Transcription;Transcription_initiation,_bacterial_sigma_factors;RNA polymerase sigma factor RpoH;RNA polymerase sigma factor RpoH	1	1	1	1	1	1	1	1
SEED;RNA Metabolism;Transcription;Transcription_initiation,_bacterial_sigma_factors;RNA polymerase sigma-54 factor RpoN;RNA polymerase sigma-54 factor RpoN	1	1	2	1	1	1	1	1
SEED;RNA Metabolism;Transcription;Transcription_initiation,_bacterial_sigma_factors;RNA polymerase sigma factor RpoS;RNA polymerase sigma factor RpoS	1	1	1	1	1	1	1	1
SEED;RNA Metabolism;Transcription;Transcription_initiation,_bacterial_sigma_factors;RNA polymerase sigma-70 factor;RNA polymerase sigma-70 factor	0	0	1	0	1	1	1	1
SEED;RNA Metabolism;RNA processing and modification;Wyeosine-MimG_Biosynthesis;tRNA (Guanine37-N1) -methyltransferase (EC 2.1.1.31);tRNA (Guanine37-N1) -methyltransferase (EC 2.1.1.31)	1	1	1	1	1	1	1	1
SEED;RNA Metabolism;RNA processing and modification;Wyeosine-MimG_Biosynthesis;Iron-sulfur cluster assembly scaffold protein IscU;Iron-sulfur cluster assembly scaffold protein IscU	1	1	1	1	1	1	1	1
SEED;RNA Metabolism;RNA processing and modification;Polyadenylation_bacterial;Poly(A) polymerase (EC 2.7.7.19);Poly(A) polymerase (EC 2.7.7.19)	1	1	1	1	1	1	1	1
SEED;RNA Metabolism;RNA processing and modification;Polyadenylation_bacterial;Polyribonucleotide nucleotidyltransferase (EC 2.7.7.8);Polyribonucleotide nucleotidyltransferase (EC 2.7.7.8)	1	1	1	1	1	1	1	1
SEED;RNA Metabolism;RNA processing and modification;RNA_processing_and_degradation,_bacterial;Ribonuclease I precursor (EC 3.1.27.6);Ribonuclease I precursor (EC 3.1.27.6)	1	1	1	1	1	1	1	1
SEED;RNA Metabolism;RNA processing and modification;RNA_processing_and_degradation,_bacterial;Exoribonuclease II (EC 3.1.13.1);Exoribonuclease II (EC 3.1.13.1)	1	1	1	1	1	1	1	1
SEED;RNA Metabolism;RNA processing and modification;RNA_processing_and_degradation,_bacterial;3'-to-5' exoribonuclease RNase R;3'-to-5' exoribonuclease RNase R	1	1	1	1	1	1	1	1
SEED;RNA Metabolism;RNA processing and modification;RNA_processing_and_degradation,_bacterial;Cytoplasmic axial filament protein CafA and Ribonuclease G (EC 3.1.4.-);Cytoplasmic axial filament protein CafA and Ribonuclease G (EC 3.1.4.-)	1	1	1	2	1	1	1	1
SEED;RNA Metabolism;RNA processing and modification;RNA_processing_and_degradation,_bacterial;Ribonuclease E inhibitor RraA;Ribonuclease E inhibitor RraA	1	1	1	1	1	1	1	1
SEED;RNA Metabolism;RNA processing and modification;RNA_processing_and_degradation,_bacterial;Ribonuclease E inhibitor RraB;Ribonuclease E inhibitor RraB	1	1	2	1	1	1	1	1
SEED;RNA Metabolism;RNA processing and modification;ATP-dependent_RNA_helicases,_bacterial;Cold-shock DEAD-box protein A;Cold-shock DEAD-box protein A	1	1	1	1	1	1	1	1
SEED;RNA Metabolism;RNA processing and modification;ATP-dependent_RNA_helicases,_bacterial;ATP-dependent RNA helicase DbpA;ATP-dependent RNA helicase DbpA	1	1	1	1	1	1	1	1
SEED;RNA Metabolism;RNA processing and modification;ATP-dependent_RNA_helicases,_bacterial;ATP-dependent RNA helicase RhlB;ATP-dependent RNA helicase RhlB	1	1	1	1	1	1	1	1
SEED;RNA Metabolism;RNA processing and modification;ATP-dependent_RNA_helicases,_bacterial;ATP-dependent RNA helicase RhlE;ATP-dependent RNA helicase RhlE	1	1	2	1	1	1	1	1
SEED;RNA Metabolism;RNA processing and modification;ATP-dependent_RNA_helicases,_bacterial;ATP-dependent RNA helicase SrmB;ATP-dependent RNA helicase SrmB	1	1	1	1	1	1	1	1
SEED;RNA Metabolism;RNA processing and modification;Ribonuclease_H;Ribonuclease_H	1	1	1	1	1	1	1	1
SEED;RNA Metabolism;RNA processing and modification;Ribonuclease_H;Ribonuclease HI (EC 3.1.26.4);Ribonuclease HI (EC 3.1.26.4)	1	1	1	1	1	1	1	1
SEED;RNA Metabolism;RNA processing and modification;tRNA_processing;Ribonuclease P protein component (EC 3.1.26.5);Ribonuclease P protein component (EC 3.1.26.5)	1	1	1	1	1	1	1	1
SEED;RNA Metabolism;RNA processing and modification;tRNA_processing;Ribonuclease BN (EC 3.1.-.-);Ribonuclease BN (EC 3.1.-.-)	1	1	1	1	1	1	1	1
SEED;RNA Metabolism;RNA processing and modification;tRNA_processing;Ribonuclease T (EC 3.1.13.-);Ribonuclease T (EC 3.1.13.-)	1	1	1	1	1	1	1	1
SEED;RNA Metabolism;RNA processing and modification;tRNA_processing;Ribonuclease Z (EC 3.1.26.11);Ribonuclease Z (EC 3.1.26.11)	1	1	1	1	1	1	1	1
SEED;RNA Metabolism;RNA processing and modification;tRNA_processing;tRNA delta(2)-isopentenylpyrophosphate transferase (EC 2.5.1.8);tRNA delta(2)-isopentenylpyrophosphate transferase (EC 2.5.1.8)	1	1	1	1	1	1	1	1
SEED;RNA Metabolism;RNA processing and modification;tRNA_processing;tRNA-i(6)A37 methylthiotransferase;tRNA-i(6)A37 methylthiotransferase	1	1	1	1	1	1	1	1
SEED;RNA Metabolism;RNA processing and modification;tRNA_processing;tRNA pseudouridine synthase A (EC 4.2.1.70);tRNA pseudouridine synthase A (EC 4.2.1.70)	2	2	2	2	1	1	1	1
SEED;RNA Metabolism;RNA processing and modification;tRNA_processing;tRNA pseudouridine synthase B (EC 4.2.1.70);tRNA pseudouridine synthase B (EC 4.2.1.70)	1	1	1	1	1	1	1	1
SEED;RNA Metabolism;RNA processing and modification;tRNA_processing;tRNA pseudouridine 13 synthase (EC 4.2.1.-);tRNA pseudouridine 13 synthase (EC 4.2.1.-)	1	1	1	1	1	1	1	1
SEED;RNA Metabolism;RNA processing and modification;tRNA_processing;tRNA(Ile)-lysidine synthetase;tRNA(Ile)-lysidine synthetase	1	1	1	2	1	1	1	1
SEED;RNA Metabolism;RNA processing and modification;tRNA_processing;tRNA-specific adenosine-34 deaminase (EC 3.5.4.-);tRNA-specific adenosine-34 deaminase (EC 3.5.4.-)	0	0	1	1	1	1	1	1
SEED;RNA Metabolism;RNA processing and modification;Queuosine-Archaeosine_Biosynthesis;Dihydroneopterin triphosphate pyrophosphohydolase type 2;Dihydroneopterin triphosphate pyrophosphohydolase type 2	1	1	1	1	1	1	1	1
SEED;RNA Metabolism;RNA processing and modification;Queuosine-Archaeosine_Biosynthesis;Queuosine biosynthesis QueD, PTPS-I;Queuosine biosynthesis QueD, PTPS-I	1	1	1	1	1	1	1	1
SEED;RNA Metabolism;RNA processing and modification;Queuosine-Archaeosine_Biosynthesis;Queuosine Biosynthesis QueC ATPase;Queuosine Biosynthesis QueC ATPase	1	1	1	1	1	1	1	1
SEED;RNA Metabolism;RNA processing and modification;Queuosine-Archaeosine_Biosynthesis;Queuosine Biosynthesis QueE Radical SAM;Queuosine Biosynthesis QueE Radical SAM	1	1	2	1	1	1	1	1
SEED;RNA Metabolism;RNA processing and modification;Queuosine-Archaeosine_Biosynthesis;NADPH dependent preQ0 reductase;NADPH dependent preQ0 reductase	1	1	1	1	1	1	1	1
SEED;RNA Metabolism;RNA processing and modification;Queuosine-Archaeosine_Biosynthesis;tRNA-guanine transglycosylase (EC 2.4.2.29);tRNA-guanine transglycosylase (EC 2.4.2.29)	1	1	1	1	1	1	1	1
SEED;RNA Metabolism;RNA processing and modification;Queuosine-Archaeosine_Biosynthesis;S-adenosylmethionine:tRNA ribosyltransferase-isomerase (EC 5.-.-.-);S-adenosylmethionine:tRNA ribosyltransferase-isomerase (EC 5.-.-.-)	1	1	1	1	1	1	1	1
SEED;RNA Metabolism;RNA processing and modification;Queuosine-Archaeosine_Biosynthesis;glutamyl-Q-tRNA synthetase;glutamyl-Q-tRNA synthetase	1	1	1	1	1	1	1	1
SEED;RNA Metabolism;RNA processing and modification;Queuosine-Archaeosine_Biosynthesis;Putative preQ0 transporter;Putative preQ0 transporter	1	1	1	1	1	1	1	1
SEED;Motility and Chemotaxis;Flagellar motility in Prokaryota;Flagellar_motility;Signal transduction histidine kinase CheA (EC 2.7.3.-);Signal transduction histidine kinase CheA (EC 2.7.3.-)	1	1	1	2	1	1	1	1
SEED;Motility and Chemotaxis;Flagellar motility in Prokaryota;Flagellar_motility;Chemotaxis protein CheV (EC 2.7.3.-);Chemotaxis protein CheV (EC 2.7.3.-)	1	1	1	1	1	1	1	1
SEED;Motility and Chemotaxis;Flagellar motility in Prokaryota;Flagellar_motility;RNA polymerase sigma-54 factor RpoN;RNA polymerase sigma-54 factor RpoN	1	1	2	1	1	1	1	1
SEED;Motility and Chemotaxis;Flagellar motility in Prokaryota;Flagellar_motility;Predicted signal transduction protein;Predicted signal transduction protein	0	0	1	1	1	1	1	1
SEED;Motility and Chemotaxis;Flagellar motility in Prokaryota;Flagellum;Flagellar biosynthesis protein FlgN;Flagellar biosynthesis protein FlgN	1	1	1	2	1	1	1	1
SEED;Motility and Chemotaxis;Flagellar motility in Prokaryota;Flagellum;Flagellar motor switch protein FliG;Flagellar motor switch protein FliG	2	1	2	2	1	1	1	1
SEED;Motility and Chemotaxis;Flagellar motility in Prokaryota;Flagellum;Flagellar biosynthesis protein FliZ;Flagellar biosynthesis protein FliZ	1	1	1	1	1	1	1	1
SEED;Motility and Chemotaxis;Flagellar motility in Prokaryota;Flagellum;Flagellar biosynthesis protein FliT;Flagellar biosynthesis protein FliT	1	1	1	1	1	1	1	1
SEED;Motility and Chemotaxis;Flagellar motility in Prokaryota;Flagellum;Flagellar biosynthesis protein FliO;Flagellar biosynthesis protein FliO	1	1	1	2	1	1	1	1
SEED;Motility and Chemotaxis;Flagellar motility in Prokaryota;Flagellum;RNA polymerase sigma factor RpoD;RNA polymerase sigma factor RpoD	1	1	1	1	1	1	1	1
SEED;Motility and Chemotaxis;Flagellar motility in Prokaryota;Flagellum;Flagellar protein FlhE;Flagellar protein FlhE	1	1	1	2	1	1	1	1
SEED;Motility and Chemotaxis;Flagellar motility in Prokaryota;Flagellum;Flagellar transcriptional activator FlhD;Flagellar transcriptional activator FlhD	1	1	1	2	1	1	1	1
SEED;Motility and Chemotaxis;Flagellar motility in Prokaryota;Flagellum;Flagellar transcriptional activator FlhC;Flagellar transcriptional activator FlhC	1	1	1	2	1	1	1	1
SEED;Motility and Chemotaxis;Flagellar motility in Prokaryota;Flagellum;Negative regulator of flagellin synthesis;Negative regulator of flagellin synthesis	1	1	1	2	1	1	1	1
SEED;Motility and Chemotaxis;Flagellar motility in Prokaryota;Flagellum;RNA polymerase sigma-54 factor RpoN;RNA polymerase sigma-54 factor RpoN	1	1	2	1	1	1	1	1
SEED;Motility and Chemotaxis;Bacterial_Chemotaxis;Methyl-accepting chemotaxis protein II (aspartate chemoreceptor protein);Methyl-accepting chemotaxis protein II (aspartate chemoreceptor protein)	1	1	1	1	1	1	1	1
SEED;Motility and Chemotaxis;Bacterial_Chemotaxis;Positive regulator of CheA protein activity (CheW);Positive regulator of CheA protein activity (CheW)	1	1	1	2	1	1	1	1
SEED;Motility and Chemotaxis;Bacterial_Chemotaxis;Signal transduction histidine kinase CheA (EC 2.7.3.-);Signal transduction histidine kinase CheA (EC 2.7.3.-)	1	1	1	2	1	1	1	1
SEED;Motility and Chemotaxis;Bacterial_Chemotaxis;Chemotaxis response - phosphatase CheZ;Chemotaxis response - phosphatase CheZ	1	1	1	2	1	1	1	1
SEED;Motility and Chemotaxis;Bacterial_Chemotaxis;Chemotaxis response regulator protein-glutamate methylesterase CheB (EC 3.1.1.61);Chemotaxis response regulator protein-glutamate methylesterase CheB (EC 3.1.1.61)	1	1	1	2	1	1	1	1
SEED;Motility and Chemotaxis;Bacterial_Chemotaxis;Flagellar motor switch protein FliG;Flagellar motor switch protein FliG	2	1	2	2	1	1	1	1
SEED;Motility and Chemotaxis;Bacterial_Chemotaxis;Galactose/methyl galactoside ABC transport system, D-galactose-binding periplasmic protein MglB (TC 3.A.1.2.3);Galactose/methyl galactoside ABC transport system, D-galactose-binding periplasmic protein MglB (TC 3.A.1.2.3)	1	1	1	1	1	1	1	1
SEED;Motility and Chemotaxis;Bacterial_Chemotaxis;Chemotaxis protein methyltransferase CheR (EC 2.1.1.80);Chemotaxis protein methyltransferase CheR (EC 2.1.1.80)	1	1	1	2	1	1	1	1
SEED;Motility and Chemotaxis;Bacterial_Chemotaxis;Chemotaxis protein CheV (EC 2.7.3.-);Chemotaxis protein CheV (EC 2.7.3.-)	1	1	1	1	1	1	1	1
SEED;Secondary Metabolism;Biosynthesis of phenylpropanoids;Biosynthesis of phenylpropanoids	1	1	1	1	1	1	1	1
SEED;Secondary Metabolism;Biosynthesis of phenylpropanoids;Phenylpropionate_Degradation;Phenylpropionate_Degradation	1	1	1	1	1	1	1	1
SEED;Secondary Metabolism;Biosynthesis of phenylpropanoids;Phenylpropionate_Degradation;3-phenylpropionate dioxygenase ferredoxin subunit;3-phenylpropionate dioxygenase ferredoxin subunit	1	1	1	1	1	1	1	1
SEED;Secondary Metabolism;Bacterial cytostatics, differentiation factors and antibiotics;Clavulanic_acid_biosynthesis;Clavulanic_acid_biosynthesis	1	0	1	1	1	1	1	1
SEED;Secondary Metabolism;Bacterial cytostatics, differentiation factors and antibiotics;Clavulanic_acid_biosynthesis;clavaminate synthase;clavaminate synthase	0	0	0	1	1	1	1	1
SEED;Secondary Metabolism;Bacterial cytostatics, differentiation factors and antibiotics;Clavulanic_acid_biosynthesis;clavaldehyde dehydrogenase;clavaldehyde dehydrogenase	1	0	1	0	1	1	0.423708	1
SEED;Secondary Metabolism;Plant Hormones;Plant Hormones	3	3	3	3	1	1	0.702896	1
SEED;Secondary Metabolism;Plant Hormones;Auxin_biosynthesis;Auxin_biosynthesis	3	3	3	3	1	1	0.702896	1
SEED;Secondary Metabolism;Plant Hormones;Auxin_biosynthesis;Tryptophan synthase alpha chain (EC 4.2.1.20);Tryptophan synthase alpha chain (EC 4.2.1.20)	1	1	1	1	1	1	1	1
SEED;Secondary Metabolism;Plant Hormones;Auxin_biosynthesis;Tryptophan synthase beta chain (EC 4.2.1.20);Tryptophan synthase beta chain (EC 4.2.1.20)	1	1	1	1	1	1	1	1
SEED;Secondary Metabolism;Plant Hormones;Auxin_biosynthesis;Monoamine oxidase (1.4.3.4);Monoamine oxidase (1.4.3.4)	1	1	1	1	1	1	1	1
SEED;Secondary Metabolism;Aromatic amino acids and derivatives.1;Aromatic amino acids and derivatives.1	3	2	3	3	1	1	0.702896	1
SEED;Secondary Metabolism;Aromatic amino acids and derivatives.1;Cinnamic_Acid_Degradation;Cinnamic_Acid_Degradation	3	2	3	3	1	1	0.702896	1
SEED;Secondary Metabolism;Aromatic amino acids and derivatives.1;Cinnamic_Acid_Degradation;3-phenylpropionate dioxygenase ferredoxin subunit;3-phenylpropionate dioxygenase ferredoxin subunit	1	1	1	1	1	1	1	1
SEED;Secondary Metabolism;Aromatic amino acids and derivatives.1;Cinnamic_Acid_Degradation;Probable 3-phenylpropionic acid transporter;Probable 3-phenylpropionic acid transporter	1	1	1	1	1	1	1	1
SEED;Secondary Metabolism;Aromatic amino acids and derivatives.1;Cinnamic_Acid_Degradation;4-hydroxybenzoate transporter;4-hydroxybenzoate transporter	1	0	1	1	1	1	1	1
SEED;Amino Acids and Derivatives;Branched-chain amino acids;Isoleucine_degradation;Isoleucine_degradation	2	2	2	2	1	1	1	1
SEED;Amino Acids and Derivatives;Branched-chain amino acids;Isoleucine_degradation;Branched-chain amino acid aminotransferase (EC 2.6.1.42);Branched-chain amino acid aminotransferase (EC 2.6.1.42)	1	1	1	1	1	1	1	1
SEED;Amino Acids and Derivatives;Branched-chain amino acids;Isoleucine_degradation;Acyl-CoA dehydrogenase, short-chain specific (EC 1.3.99.2);Acyl-CoA dehydrogenase, short-chain specific (EC 1.3.99.2)	1	1	1	1	1	1	1	1
SEED;Amino Acids and Derivatives;Branched-chain amino acids;Leucine_Degradation_and_HMG-CoA_Metabolism;Leucine_Degradation_and_HMG-CoA_Metabolism	1	0	1	1	1	1	1	1
SEED;Amino Acids and Derivatives;Branched-chain amino acids;Leucine_Degradation_and_HMG-CoA_Metabolism;Dihydrolipoamide dehydrogenase (EC 1.8.1.4);Dihydrolipoamide dehydrogenase (EC 1.8.1.4)	1	0	1	1	1	1	1	1
SEED;Amino Acids and Derivatives;Branched-chain amino acids;Leucine_Biosynthesis;3-isopropylmalate dehydratase small subunit (EC 4.2.1.33);3-isopropylmalate dehydratase small subunit (EC 4.2.1.33)	1	1	1	2	1	1	1	1
SEED;Amino Acids and Derivatives;Branched-chain amino acids;Leucine_Biosynthesis;3-isopropylmalate dehydrogenase (EC 1.1.1.85);3-isopropylmalate dehydrogenase (EC 1.1.1.85)	1	1	1	1	1	1	1	1
SEED;Amino Acids and Derivatives;Branched-chain amino acids;Leucine_Biosynthesis;Probable transcriptional activator for leuABCD operon;Probable transcriptional activator for leuABCD operon	1	1	1	1	1	1	1	1
SEED;Amino Acids and Derivatives;Branched-chain amino acids;Branched-Chain_Amino_Acid_Biosynthesis;Threonine dehydratase biosynthetic (EC 4.3.1.19);Threonine dehydratase biosynthetic (EC 4.3.1.19)	1	1	1	1	1	1	1	1
SEED;Amino Acids and Derivatives;Arginine; urea cycle, polyamines;Polyamine_Metabolism;Ornithine decarboxylase (EC 4.1.1.17);Ornithine decarboxylase (EC 4.1.1.17)	2	1	2	2	1	1	1	1
SEED;Amino Acids and Derivatives;Arginine; urea cycle, polyamines;Polyamine_Metabolism;Agmatinase (EC 3.5.3.11);Agmatinase (EC 3.5.3.11)	1	1	1	1	1	1	1	1
SEED;Amino Acids and Derivatives;Arginine; urea cycle, polyamines;Polyamine_Metabolism;Spermidine synthase (EC 2.5.1.16);Spermidine synthase (EC 2.5.1.16)	1	1	2	1	1	1	1	1
SEED;Amino Acids and Derivatives;Arginine; urea cycle, polyamines;Polyamine_Metabolism;S-adenosylmethionine decarboxylase proenzyme (EC 4.1.1.50), prokaryotic class 1A;S-adenosylmethionine decarboxylase proenzyme (EC 4.1.1.50), prokaryotic class 1A	1	1	1	1	1	1	1	1
SEED;Amino Acids and Derivatives;Arginine; urea cycle, polyamines;Polyamine_Metabolism;Spermidine Putrescine ABC transporter permease component potC (TC_3.A.1.11.1);Spermidine Putrescine ABC transporter permease component potC (TC_3.A.1.11.1)	1	2	2	2	1	1	1	1
SEED;Amino Acids and Derivatives;Arginine; urea cycle, polyamines;Polyamine_Metabolism;Putrescine/proton symporter, putrescine/ornithine antiporter PotE;Putrescine/proton symporter, putrescine/ornithine antiporter PotE	0	0	1	0	1	1	1	1
SEED;Amino Acids and Derivatives;Arginine; urea cycle, polyamines;Polyamine_Metabolism;Arginine/ornithine antiporter ArcD;Arginine/ornithine antiporter ArcD	1	0	1	1	1	1	1	1
SEED;Amino Acids and Derivatives;Arginine; urea cycle, polyamines;Polyamine_Metabolism;Arginine/ornithine antiporter;Arginine/ornithine antiporter	1	1	1	2	1	1	1	1
SEED;Amino Acids and Derivatives;Arginine; urea cycle, polyamines;Polyamine_Metabolism;Spermidine N1-acetyltransferase (EC 2.3.1.57);Spermidine N1-acetyltransferase (EC 2.3.1.57)	1	0	1	1	1	1	1	1
SEED;Amino Acids and Derivatives;Arginine; urea cycle, polyamines;Polyamine_Metabolism;4-aminobutyraldehyde dehydrogenase (EC 1.2.1.19);4-aminobutyraldehyde dehydrogenase (EC 1.2.1.19)	1	1	1	1	1	1	1	1
SEED;Amino Acids and Derivatives;Arginine; urea cycle, polyamines;Cyanophycin_Metabolism;Cyanophycin_Metabolism	1	1	1	1	1	1	1	1
SEED;Amino Acids and Derivatives;Arginine; urea cycle, polyamines;Cyanophycin_Metabolism;Asparagine synthetase [glutamine-hydrolyzing] (EC 6.3.5.4);Asparagine synthetase [glutamine-hydrolyzing] (EC 6.3.5.4)	1	1	1	1	1	1	1	1
SEED;Amino Acids and Derivatives;Arginine; urea cycle, polyamines;Arginine_and_Ornithine_Degradation;Arginine N-succinyltransferase (EC 2.3.1.109);Arginine N-succinyltransferase (EC 2.3.1.109)	1	1	1	1	1	1	1	1
SEED;Amino Acids and Derivatives;Arginine; urea cycle, polyamines;Arginine_and_Ornithine_Degradation;Succinylarginine dihydrolase (EC 3.5.3.23);Succinylarginine dihydrolase (EC 3.5.3.23)	1	1	1	1	1	1	1	1
SEED;Amino Acids and Derivatives;Arginine; urea cycle, polyamines;Arginine_and_Ornithine_Degradation;Succinylornithine transaminase (EC 2.6.1.81);Succinylornithine transaminase (EC 2.6.1.81)	1	1	1	1	1	1	1	1
SEED;Amino Acids and Derivatives;Arginine; urea cycle, polyamines;Arginine_and_Ornithine_Degradation;Succinylglutamic semialdehyde dehydrogenase (EC 1.2.1.71);Succinylglutamic semialdehyde dehydrogenase (EC 1.2.1.71)	1	1	1	1	1	1	1	1
SEED;Amino Acids and Derivatives;Arginine; urea cycle, polyamines;Arginine_and_Ornithine_Degradation;Succinylglutamate desuccinylase (EC 3.5.1.96);Succinylglutamate desuccinylase (EC 3.5.1.96)	1	1	1	1	1	1	1	1
SEED;Amino Acids and Derivatives;Arginine; urea cycle, polyamines;Arginine_and_Ornithine_Degradation;Arginine pathway regulatory protein ArgR, repressor of arg regulon;Arginine pathway regulatory protein ArgR, repressor of arg regulon	2	1	2	2	1	1	1	1
SEED;Amino Acids and Derivatives;Arginine; urea cycle, polyamines;Arginine_and_Ornithine_Degradation;NADP-specific glutamate dehydrogenase (EC 1.4.1.4);NADP-specific glutamate dehydrogenase (EC 1.4.1.4)	1	1	1	1	1	1	1	1
SEED;Amino Acids and Derivatives;Arginine; urea cycle, polyamines;Arginine_and_Ornithine_Degradation;Ornithine carbamoyltransferase (EC 2.1.3.3);Ornithine carbamoyltransferase (EC 2.1.3.3)	2	1	2	2	1	1	1	1
SEED;Amino Acids and Derivatives;Arginine; urea cycle, polyamines;Arginine_and_Ornithine_Degradation;Arginine/ornithine antiporter ArcD;Arginine/ornithine antiporter ArcD	1	0	1	1	1	1	1	1
SEED;Amino Acids and Derivatives;Arginine; urea cycle, polyamines;Arginine_and_Ornithine_Degradation;Arginine ABC transporter, permease protein ArtQ;Arginine ABC transporter, permease protein ArtQ	1	1	1	1	1	1	1	1
SEED;Amino Acids and Derivatives;Arginine; urea cycle, polyamines;Arginine_and_Ornithine_Degradation;Arginine ABC transporter, permease protein ArtM;Arginine ABC transporter, permease protein ArtM	1	1	1	1	1	1	1	1
SEED;Amino Acids and Derivatives;Arginine; urea cycle, polyamines;Arginine_and_Ornithine_Degradation;Arginine ABC transporter, periplasmic arginine-binding protein ArtI;Arginine ABC transporter, periplasmic arginine-binding protein ArtI	1	1	1	1	1	1	1	1
SEED;Amino Acids and Derivatives;Arginine; urea cycle, polyamines;Arginine_and_Ornithine_Degradation;Arginine ABC transporter, ATP-binding protein ArtP;Arginine ABC transporter, ATP-binding protein ArtP	1	1	1	1	1	1	1	1
SEED;Amino Acids and Derivatives;Arginine; urea cycle, polyamines;Arginine_and_Ornithine_Degradation;Arginine ABC transporter, periplasmic arginine-binding protein ArtJ;Arginine ABC transporter, periplasmic arginine-binding protein ArtJ	1	1	1	1	1	1	1	1
SEED;Amino Acids and Derivatives;Arginine; urea cycle, polyamines;Arginine_and_Ornithine_Degradation;Lysine-arginine-ornithine-binding periplasmic protein precursor (TC 3.A.1.3.1);Lysine-arginine-ornithine-binding periplasmic protein precursor (TC 3.A.1.3.1)	2	2	2	2	1	1	1	1
SEED;Amino Acids and Derivatives;Arginine; urea cycle, polyamines;Arginine_and_Ornithine_Degradation;Histidine ABC transporter, permease protein HisQ (TC 3.A.1.3.1);Histidine ABC transporter, permease protein HisQ (TC 3.A.1.3.1)	1	1	1	1	1	1	1	1
SEED;Amino Acids and Derivatives;Arginine; urea cycle, polyamines;Arginine_and_Ornithine_Degradation;Histidine ABC transporter, permease protein HisM (TC 3.A.1.3.1);Histidine ABC transporter, permease protein HisM (TC 3.A.1.3.1)	1	1	1	1	1	1	1	1
SEED;Amino Acids and Derivatives;Arginine; urea cycle, polyamines;Arginine_and_Ornithine_Degradation;Histidine ABC transporter, ATP-binding protein HisP (TC 3.A.1.3.1);Histidine ABC transporter, ATP-binding protein HisP (TC 3.A.1.3.1)	1	1	1	1	1	1	1	1
SEED;Amino Acids and Derivatives;Arginine; urea cycle, polyamines;Arginine_Biosynthesis_extended;N-acetylglutamate synthase (EC 2.3.1.1);N-acetylglutamate synthase (EC 2.3.1.1)	1	1	1	1	1	1	1	1
SEED;Amino Acids and Derivatives;Arginine; urea cycle, polyamines;Arginine_Biosynthesis_extended;N-acetyl-gamma-glutamyl-phosphate reductase (EC 1.2.1.38);N-acetyl-gamma-glutamyl-phosphate reductase (EC 1.2.1.38)	1	1	1	1	1	1	1	1
SEED;Amino Acids and Derivatives;Arginine; urea cycle, polyamines;Arginine_Biosynthesis_extended;Acetylornithine deacetylase (EC 3.5.1.16);Acetylornithine deacetylase (EC 3.5.1.16)	1	1	1	1	1	1	1	1
SEED;Amino Acids and Derivatives;Arginine; urea cycle, polyamines;Arginine_Biosynthesis_extended;Argininosuccinate lyase (EC 4.3.2.1);Argininosuccinate lyase (EC 4.3.2.1)	1	1	1	1	1	1	1	1
SEED;Amino Acids and Derivatives;Arginine; urea cycle, polyamines;Arginine_Biosynthesis_extended;Arginine pathway regulatory protein ArgR, repressor of arg regulon;Arginine pathway regulatory protein ArgR, repressor of arg regulon	2	1	2	2	1	1	1	1
SEED;Amino Acids and Derivatives;Arginine; urea cycle, polyamines;Arginine_Deiminase_Pathway;Arginine/ornithine antiporter ArcD;Arginine/ornithine antiporter ArcD	1	0	1	1	1	1	1	1
SEED;Amino Acids and Derivatives;Arginine; urea cycle, polyamines;Arginine_Deiminase_Pathway;Arginine pathway regulatory protein ArgR, repressor of arg regulon;Arginine pathway regulatory protein ArgR, repressor of arg regulon	2	1	2	2	1	1	1	1
SEED;Amino Acids and Derivatives;Arginine; urea cycle, polyamines;Urea_decomposition;Urease alpha subunit (EC 3.5.1.5);Urease alpha subunit (EC 3.5.1.5)	1	1	1	1	1	1	1	1
SEED;Amino Acids and Derivatives;Arginine; urea cycle, polyamines;Urea_decomposition;Urease beta subunit (EC 3.5.1.5);Urease beta subunit (EC 3.5.1.5)	1	1	1	1	1	1	1	1
SEED;Amino Acids and Derivatives;Arginine; urea cycle, polyamines;Urea_decomposition;Urease gamma subunit (EC 3.5.1.5);Urease gamma subunit (EC 3.5.1.5)	1	1	1	1	1	1	1	1
SEED;Amino Acids and Derivatives;Arginine; urea cycle, polyamines;Urea_decomposition;Urease accessory protein UreD;Urease accessory protein UreD	1	1	1	1	1	1	1	1
SEED;Amino Acids and Derivatives;Arginine; urea cycle, polyamines;Urea_decomposition;Urease accessory protein UreE;Urease accessory protein UreE	1	1	1	1	1	1	1	1
SEED;Amino Acids and Derivatives;Arginine; urea cycle, polyamines;Urea_decomposition;Urease accessory protein UreF;Urease accessory protein UreF	1	1	1	1	1	1	1	1
SEED;Amino Acids and Derivatives;Arginine; urea cycle, polyamines;Urea_decomposition;Urease accessory protein UreG;Urease accessory protein UreG	1	1	1	1	1	1	1	1
SEED;Amino Acids and Derivatives;Arginine; urea cycle, polyamines;Urea_decomposition;Urea ABC transporter, urea binding protein;Urea ABC transporter, urea binding protein	1	1	1	1	1	1	1	1
SEED;Amino Acids and Derivatives;Arginine; urea cycle, polyamines;Urea_decomposition;Urea ABC transporter, permease protein UrtB;Urea ABC transporter, permease protein UrtB	1	1	1	1	1	1	1	1
SEED;Amino Acids and Derivatives;Arginine; urea cycle, polyamines;Urea_decomposition;Urea ABC transporter, permease protein UrtC;Urea ABC transporter, permease protein UrtC	1	1	1	1	1	1	1	1
SEED;Amino Acids and Derivatives;Arginine; urea cycle, polyamines;Urea_decomposition;Urea ABC transporter, ATPase protein UrtD;Urea ABC transporter, ATPase protein UrtD	1	1	1	1	1	1	1	1
SEED;Amino Acids and Derivatives;Arginine; urea cycle, polyamines;Urea_decomposition;Urea ABC transporter, ATPase protein UrtE;Urea ABC transporter, ATPase protein UrtE	2	1	2	2	1	1	1	1
SEED;Amino Acids and Derivatives;Arginine; urea cycle, polyamines;Urea_decomposition;Urea carboxylase (EC 6.3.4.6);Urea carboxylase (EC 6.3.4.6)	0	0	1	1	1	1	1	1
SEED;Amino Acids and Derivatives;Arginine; urea cycle, polyamines;Urea_decomposition;Allophanate hydrolase (EC 3.5.1.54);Allophanate hydrolase (EC 3.5.1.54)	0	0	1	1	1	1	1	1
SEED;Amino Acids and Derivatives;Arginine; urea cycle, polyamines;Urea_decomposition;Urea carboxylase-related ABC transporter, periplasmic substrate-binding protein;Urea carboxylase-related ABC transporter, periplasmic substrate-binding protein	0	0	1	1	1	1	1	1
SEED;Amino Acids and Derivatives;Arginine; urea cycle, polyamines;Urea_decomposition;Urea carboxylase-related ABC transporter, permease protein;Urea carboxylase-related ABC transporter, permease protein	0	0	1	1	1	1	1	1
SEED;Amino Acids and Derivatives;Arginine; urea cycle, polyamines;Urea_decomposition;Urea carboxylase-related ABC transporter, ATPase protein;Urea carboxylase-related ABC transporter, ATPase protein	0	0	1	1	1	1	1	1
SEED;Amino Acids and Derivatives;Arginine; urea cycle, polyamines;Urea_decomposition;HupE-UreJ family metal transporter;HupE-UreJ family metal transporter	1	1	1	1	1	1	1	1
SEED;Amino Acids and Derivatives;Lysine, threonine, methionine, and cysteine.1;Threonine_degradation;Monoamine oxidase (1.4.3.4);Monoamine oxidase (1.4.3.4)	1	1	1	1	1	1	1	1
SEED;Amino Acids and Derivatives;Lysine, threonine, methionine, and cysteine.1;Threonine_degradation;Low-specificity L-threonine aldolase (EC 4.1.2.5);Low-specificity L-threonine aldolase (EC 4.1.2.5)	1	1	1	1	1	1	1	1
SEED;Amino Acids and Derivatives;Lysine, threonine, methionine, and cysteine.1;Threonine_degradation;L-threonine 3-dehydrogenase (EC 1.1.1.103);L-threonine 3-dehydrogenase (EC 1.1.1.103)	1	1	1	1	1	1	1	1
SEED;Amino Acids and Derivatives;Lysine, threonine, methionine, and cysteine.1;Threonine_degradation;Threonine dehydratase, catabolic (EC 4.3.1.19);Threonine dehydratase, catabolic (EC 4.3.1.19)	1	0	1	1	1	1	1	1
SEED;Amino Acids and Derivatives;Lysine, threonine, methionine, and cysteine.1;Threonine_and_Homoserine_Biosynthesis;Aspartokinase (EC 2.7.2.4);Aspartokinase (EC 2.7.2.4)	1	1	1	1	1	1	1	1
SEED;Amino Acids and Derivatives;Lysine, threonine, methionine, and cysteine.1;Threonine_and_Homoserine_Biosynthesis;Aspartate-semialdehyde dehydrogenase (EC 1.2.1.11);Aspartate-semialdehyde dehydrogenase (EC 1.2.1.11)	2	3	3	3	1	1	1	1
SEED;Amino Acids and Derivatives;Lysine, threonine, methionine, and cysteine.1;Threonine_and_Homoserine_Biosynthesis;Homoserine kinase (EC 2.7.1.39);Homoserine kinase (EC 2.7.1.39)	1	1	1	1	1	1	1	1
SEED;Amino Acids and Derivatives;Lysine, threonine, methionine, and cysteine.1;Threonine_and_Homoserine_Biosynthesis;Threonine synthase (EC 4.2.3.1);Threonine synthase (EC 4.2.3.1)	1	1	1	1	1	1	1	1
SEED;Amino Acids and Derivatives;Lysine, threonine, methionine, and cysteine.1;Methionine_Salvage;5-methylthioribose kinase (EC 2.7.1.100);5-methylthioribose kinase (EC 2.7.1.100)	1	1	1	1	1	1	1	1
SEED;Amino Acids and Derivatives;Lysine, threonine, methionine, and cysteine.1;Methionine_Salvage;Methylthioribose-1-phosphate isomerase (EC 5.3.1.23);Methylthioribose-1-phosphate isomerase (EC 5.3.1.23)	1	1	1	1	1	1	1	1
SEED;Amino Acids and Derivatives;Lysine, threonine, methionine, and cysteine.1;Methionine_Salvage;Methylthioribulose-1-phosphate dehydratase (EC 4.2.1.109);Methylthioribulose-1-phosphate dehydratase (EC 4.2.1.109)	1	1	1	1	1	1	1	1
SEED;Amino Acids and Derivatives;Lysine, threonine, methionine, and cysteine.1;Methionine_Salvage;1,2-dihydroxy-3-keto-5-methylthiopentene dioxygenase (EC 1.13.11.54);1,2-dihydroxy-3-keto-5-methylthiopentene dioxygenase (EC 1.13.11.54)	1	1	1	1	1	1	1	1
SEED;Amino Acids and Derivatives;Lysine, threonine, methionine, and cysteine.1;Methionine_Salvage;Methionine aminotransferase, PLP-dependent;Methionine aminotransferase, PLP-dependent	1	1	1	1	1	1	1	1
SEED;Amino Acids and Derivatives;Lysine, threonine, methionine, and cysteine.1;Lysine_degradation;Lysine decarboxylase 2, constitutive (EC 4.1.1.18);Lysine decarboxylase 2, constitutive (EC 4.1.1.18)	1	1	1	1	1	1	1	1
SEED;Amino Acids and Derivatives;Lysine, threonine, methionine, and cysteine.1;Lysine_degradation;L-lysine permease;L-lysine permease	1	1	1	1	1	1	1	1
SEED;Amino Acids and Derivatives;Lysine, threonine, methionine, and cysteine.1;Lysine_degradation;Lysine 2,3-aminomutase (EC 5.4.3.2);Lysine 2,3-aminomutase (EC 5.4.3.2)	1	1	1	1	1	1	1	1
SEED;Amino Acids and Derivatives;Lysine, threonine, methionine, and cysteine.1;Lysine_degradation;Outer membrane porin, OprD family;Outer membrane porin, OprD family	0	1	1	1	1	1	1	1
SEED;Amino Acids and Derivatives;Lysine, threonine, methionine, and cysteine.1;Lysine_Biosynthesis_DAP_Pathway;Dihydrodipicolinate reductase (EC 1.3.1.26);Dihydrodipicolinate reductase (EC 1.3.1.26)	1	1	1	1	1	1	1	1
SEED;Amino Acids and Derivatives;Lysine, threonine, methionine, and cysteine.1;Lysine_Biosynthesis_DAP_Pathway;2,3,4,5-tetrahydropyridine-2,6-dicarboxylate N-succinyltransferase (EC 2.3.1.117);2,3,4,5-tetrahydropyridine-2,6-dicarboxylate N-succinyltransferase (EC 2.3.1.117)	1	1	1	1	1	1	1	1
SEED;Amino Acids and Derivatives;Lysine, threonine, methionine, and cysteine.1;Lysine_Biosynthesis_DAP_Pathway;N-succinyl-L,L-diaminopimelate desuccinylase (EC 3.5.1.18);N-succinyl-L,L-diaminopimelate desuccinylase (EC 3.5.1.18)	1	1	1	1	1	1	1	1
SEED;Amino Acids and Derivatives;Lysine, threonine, methionine, and cysteine.1;Lysine_Biosynthesis_DAP_Pathway;Diaminopimelate decarboxylase (EC 4.1.1.20);Diaminopimelate decarboxylase (EC 4.1.1.20)	1	1	1	1	1	1	1	1
SEED;Amino Acids and Derivatives;Lysine, threonine, methionine, and cysteine.1;Methionine_Degradation;Methionine ABC transporter permease protein;Methionine ABC transporter permease protein	2	2	2	2	1	1	1	1
SEED;Amino Acids and Derivatives;Lysine, threonine, methionine, and cysteine.1;Methionine_Degradation;S-adenosylmethionine synthetase (EC 2.5.1.6);S-adenosylmethionine synthetase (EC 2.5.1.6)	1	1	1	1	1	1	1	1
SEED;Amino Acids and Derivatives;Lysine, threonine, methionine, and cysteine.1;Methionine_Degradation;Pyruvate-flavodoxin oxidoreductase (EC 1.2.7.-);Pyruvate-flavodoxin oxidoreductase (EC 1.2.7.-)	1	1	1	1	1	1	1	1
SEED;Amino Acids and Derivatives;Lysine, threonine, methionine, and cysteine.1;Threonine_anaerobic_catabolism_gene_cluster;Threonine_anaerobic_catabolism_gene_cluster	5	4	5	6	1	1	1	1
SEED;Amino Acids and Derivatives;Lysine, threonine, methionine, and cysteine.1;Methionine_Biosynthesis;Homoserine O-succinyltransferase (EC 2.3.1.46);Homoserine O-succinyltransferase (EC 2.3.1.46)	1	1	1	1	1	1	1	1
SEED;Amino Acids and Derivatives;Lysine, threonine, methionine, and cysteine.1;Methionine_Biosynthesis;Cystathionine gamma-synthase (EC 2.5.1.48);Cystathionine gamma-synthase (EC 2.5.1.48)	1	1	1	1	1	1	1	1
SEED;Amino Acids and Derivatives;Lysine, threonine, methionine, and cysteine.1;Methionine_Biosynthesis;Cystathionine beta-lyase (EC 4.4.1.8);Cystathionine beta-lyase (EC 4.4.1.8)	1	1	1	1	1	1	1	1
SEED;Amino Acids and Derivatives;Lysine, threonine, methionine, and cysteine.1;Methionine_Biosynthesis;5-methyltetrahydropteroyltriglutamate--homocysteine methyltransferase (EC 2.1.1.14);5-methyltetrahydropteroyltriglutamate--homocysteine methyltransferase (EC 2.1.1.14)	2	2	2	2	1	1	1	1
SEED;Amino Acids and Derivatives;Lysine, threonine, methionine, and cysteine.1;Methionine_Biosynthesis;Methionine ABC transporter permease protein;Methionine ABC transporter permease protein	2	2	2	2	1	1	1	1
SEED;Amino Acids and Derivatives;Lysine, threonine, methionine, and cysteine.1;Methionine_Biosynthesis;Homocysteine S-methyltransferase (EC 2.1.1.10);Homocysteine S-methyltransferase (EC 2.1.1.10)	1	1	1	1	1	1	1	1
SEED;Amino Acids and Derivatives;Lysine, threonine, methionine, and cysteine.1;Methionine_Biosynthesis;Serine acetyltransferase (EC 2.3.1.30);Serine acetyltransferase (EC 2.3.1.30)	1	1	1	1	1	1	1	1
SEED;Amino Acids and Derivatives;Lysine, threonine, methionine, and cysteine.1;Methionine_Biosynthesis;Cysteine synthase (EC 2.5.1.47);Cysteine synthase (EC 2.5.1.47)	1	1	1	1	1	1	1	1
SEED;Amino Acids and Derivatives;Lysine, threonine, methionine, and cysteine.1;Methionine_Biosynthesis;Methionine repressor MetJ;Methionine repressor MetJ	1	1	1	1	1	1	1	1
SEED;Amino Acids and Derivatives;Lysine, threonine, methionine, and cysteine.1;Cysteine_Biosynthesis;Sulfate adenylyltransferase subunit 1 (EC 2.7.7.4);Sulfate adenylyltransferase subunit 1 (EC 2.7.7.4)	1	1	1	1	1	1	1	1
SEED;Amino Acids and Derivatives;Lysine, threonine, methionine, and cysteine.1;Cysteine_Biosynthesis;Sulfate adenylyltransferase subunit 2 (EC 2.7.7.4);Sulfate adenylyltransferase subunit 2 (EC 2.7.7.4)	1	1	1	1	1	1	1	1
SEED;Amino Acids and Derivatives;Lysine, threonine, methionine, and cysteine.1;Cysteine_Biosynthesis;Phosphoadenylyl-sulfate reductase [thioredoxin] (EC 1.8.4.8);Phosphoadenylyl-sulfate reductase [thioredoxin] (EC 1.8.4.8)	1	1	1	1	1	1	1	1
SEED;Amino Acids and Derivatives;Lysine, threonine, methionine, and cysteine.1;Cysteine_Biosynthesis;Sulfite reductase [NADPH] hemoprotein beta-component (EC 1.8.1.2);Sulfite reductase [NADPH] hemoprotein beta-component (EC 1.8.1.2)	1	1	1	1	1	1	1	1
SEED;Amino Acids and Derivatives;Lysine, threonine, methionine, and cysteine.1;Cysteine_Biosynthesis;Sulfite reductase [NADPH] flavoprotein alpha-component (EC 1.8.1.2);Sulfite reductase [NADPH] flavoprotein alpha-component (EC 1.8.1.2)	1	1	1	1	1	1	1	1
SEED;Amino Acids and Derivatives;Lysine, threonine, methionine, and cysteine.1;Cysteine_Biosynthesis;Sulfate transport system permease protein CysT;Sulfate transport system permease protein CysT	1	1	1	1	1	1	1	1
SEED;Amino Acids and Derivatives;Lysine, threonine, methionine, and cysteine.1;Cysteine_Biosynthesis;Sulfate transport system permease protein CysW;Sulfate transport system permease protein CysW	1	1	1	1	1	1	1	1
SEED;Amino Acids and Derivatives;Lysine, threonine, methionine, and cysteine.1;Cysteine_Biosynthesis;Sulfate and thiosulfate import ATP-binding protein CysA (EC 3.6.3.25);Sulfate and thiosulfate import ATP-binding protein CysA (EC 3.6.3.25)	1	1	1	1	1	1	1	1
SEED;Amino Acids and Derivatives;Lysine, threonine, methionine, and cysteine.1;Cysteine_Biosynthesis;Sulfate and thiosulfate binding protein CysP;Sulfate and thiosulfate binding protein CysP	1	1	1	1	1	1	1	1
SEED;Amino Acids and Derivatives;Lysine, threonine, methionine, and cysteine.1;Cysteine_Biosynthesis;Sulfate transporter, CysZ-type;Sulfate transporter, CysZ-type	1	1	1	1	1	1	1	1
SEED;Amino Acids and Derivatives;Lysine, threonine, methionine, and cysteine.1;Cysteine_Biosynthesis;Cys regulon transcriptional activator CysB;Cys regulon transcriptional activator CysB	2	2	2	2	1	1	1	1
SEED;Amino Acids and Derivatives;Proline and 4-hydroxyproline;Proline,_4-hydroxyproline_uptake_and_utilization;Transcriptional repressor of PutA and PutP;Transcriptional repressor of PutA and PutP	1	1	1	1	1	1	1	1
SEED;Amino Acids and Derivatives;Proline and 4-hydroxyproline;Proline,_4-hydroxyproline_uptake_and_utilization;ProQ: influences osmotic activation of compatible solute ProP;ProQ: influences osmotic activation of compatible solute ProP	1	1	1	1	1	1	1	1
SEED;Amino Acids and Derivatives;Proline and 4-hydroxyproline;Proline,_4-hydroxyproline_uptake_and_utilization;Proline-specific permease proY;Proline-specific permease proY	1	1	1	1	1	1	1	1
SEED;Amino Acids and Derivatives;Proline and 4-hydroxyproline;Proline_Synthesis;Proline_Synthesis	3	3	3	3	1	1	0.702896	1
SEED;Amino Acids and Derivatives;Proline and 4-hydroxyproline;Proline_Synthesis;Glutamate 5-kinase (EC 2.7.2.11);Glutamate 5-kinase (EC 2.7.2.11)	1	1	1	1	1	1	1	1
[truncated: 781 more rows]

## Sheet: Table S12B
Table S12B. KEGG comparison summary for CPCRI-1,3 vs non-PGPRs ( Enterobacter cloacae EcWSU1, Enterobacter cloacae subsp cloacae ATCC 13047)
KEGG	CPCRI-1 (Total gene)	CPCRI-3 (Total gene)	Enterobacter cloacae EcWSU1 (Total gene)	Enterobacter cloacae subsp cloacae ATCC 13047 (Total gene)	CPCRI-1- Enterobacter cloacae EcWSU1	CPCRI-3- Enterobacter cloacae EcWSU1	CPCRI-1- Enterobacter cloacae subsp cloacae ATCC 13047	CPCRI-3- Enterobacter cloacae subsp cloacae ATCC 13047
KEGG;Metabolism;	888	898	973	936	0.457979	0.918938	7.31861e-07	3.74347e-05
KEGG;Environmental Information Processing;Membrane Transport;ABC transporters;	227	248	235	242	0.338673	0.175285	0.0112027	0.00283406
KEGG;Environmental Information Processing;Membrane Transport;	320	332	339	338	0.373404	0.521605	0.00194512	0.00375833
KEGG;Metabolism;Metabolism of Cofactors and Vitamins;	147	155	152	149	0.44361	0.416891	0.0142921	0.0136179
KEGG;Metabolism;Xenobiotics Biodegradation and Metabolism;	55	66	61	55	0.925488	0.421266	0.120454	0.0208473
KEGG;Metabolism;Lipid Metabolism;Linoleic acid metabolism;	1	4	0	0	0.467612	0.0537277	0.423708	0.0365734
KEGG;Environmental Information Processing;Membrane Transport;Phosphotransferase system (PTS);K02757;	0	4	1	0	1	0.202582	1	0.0365734
KEGG;Metabolism;Biosynthesis of Polyketides and Terpenoids;	36	47	43	38	0.909941	0.459383	0.289393	0.0367027
KEGG;Environmental Information Processing;	449	455	475	508	0.298303	0.654036	0.00679918	0.0379587
KEGG;Environmental Information Processing;Signal Transduction;Two-component system;K07644;	0	0	1	6	1	1	0.0424612	0.0387828
KEGG;Cellular Processes;Cell Motility;Flagellar assembly;	67	37	37	72	0.000346695	0.815532	0.167915	0.041671
KEGG;Metabolism;Nucleotide Metabolism;	104	108	111	105	0.678185	0.732748	0.0339254	0.0431604
KEGG;Metabolism;Xenobiotics Biodegradation and Metabolism;1- and 2-Methylnaphthalene degradation;	7	10	4	4	0.366682	0.107974	0.221543	0.055718
KEGG;Metabolism;Xenobiotics Biodegradation and Metabolism;Benzoate degradation via hydroxylation;	6	10	6	4	1	0.31894	0.340434	0.055718
KEGG;Genetic Information Processing;	177	182	179	192	0.278838	0.420386	0.0362961	0.063099
KEGG;Metabolism;Energy Metabolism;	156	155	169	161	0.691945	0.95488	0.0178102	0.0652548
KEGG;Environmental Information Processing;Signal Transduction;Two-component system;K07665;	0	0	1	5	1	1	0.0772626	0.072453
KEGG;Environmental Information Processing;Signal Transduction;Two-component system;K07796;	0	0	1	5	1	1	0.0772626	0.072453
KEGG;Metabolism;Amino Acid Metabolism;	232	222	241	241	0.344139	0.961969	0.00427375	0.0762582
KEGG;Metabolism;Carbohydrate Metabolism;Fructose and mannose metabolism;K00100;	1	3	0	0	0.467612	0.111576	0.423708	0.0836159
KEGG;Metabolism;Carbohydrate Metabolism;Butanoate metabolism;K00100;	1	3	0	0	0.467612	0.111576	0.423708	0.0836159
KEGG;Metabolism;Lipid Metabolism;Linoleic acid metabolism;K00100;	1	3	0	0	0.467612	0.111576	0.423708	0.0836159
KEGG;Metabolism;Xenobiotics Biodegradation and Metabolism;Tetrachloroethene degradation;	1	3	0	0	0.467612	0.111576	0.423708	0.0836159
KEGG;Metabolism;Xenobiotics Biodegradation and Metabolism;Tetrachloroethene degradation;K00100;	1	3	0	0	0.467612	0.111576	0.423708	0.0836159
KEGG;Metabolism;Xenobiotics Biodegradation and Metabolism;Bisphenol A degradation;	1	3	0	0	0.467612	0.111576	0.423708	0.0836159
KEGG;Metabolism;Xenobiotics Biodegradation and Metabolism;Bisphenol A degradation;K00100;	1	3	0	0	0.467612	0.111576	0.423708	0.0836159
KEGG;Metabolism;Carbohydrate Metabolism;Butanoate metabolism;K01726;	0	3	0	0	1	0.111576	1	0.0836159
KEGG;Metabolism;Biosynthesis of Polyketides and Terpenoids;Limonene and pinene degradation;K01726;	0	3	0	0	1	0.111576	1	0.0836159
KEGG;Metabolism;Biosynthesis of Polyketides and Terpenoids;Carotenoid biosynthesis;	0	3	0	0	1	0.111576	1	0.0836159
KEGG;Metabolism;Xenobiotics Biodegradation and Metabolism;Benzoate degradation via CoA ligation;K01726;	0	3	0	0	1	0.111576	1	0.0836159
KEGG;Metabolism;Xenobiotics Biodegradation and Metabolism;Benzoate degradation via hydroxylation;K01726;	0	3	0	0	1	0.111576	1	0.0836159
KEGG;Metabolism;Xenobiotics Biodegradation and Metabolism;1- and 2-Methylnaphthalene degradation;K01726;	0	3	0	0	1	0.111576	1	0.0836159
KEGG;Metabolism;Carbohydrate Metabolism;	288	287	344	320	0.591433	0.201428	0.0159661	0.0918239
KEGG;Metabolism;Nucleotide Metabolism;Purine metabolism;	78	81	81	80	0.57539	0.69174	0.0881424	0.10901
KEGG;Metabolism;Biosynthesis of Polyketides and Terpenoids;Limonene and pinene degradation;	7	10	5	5	0.565119	0.197289	0.381455	0.11515
KEGG;Metabolism;Carbohydrate Metabolism;Fructose and mannose metabolism;	32	38	42	33	0.561035	1	0.313726	0.118059
KEGG;Genetic Information Processing;Translation;	83	84	87	86	0.641609	0.817015	0.0842181	0.139366
KEGG;Metabolism;Glycan Biosynthesis and Metabolism;	59	54	53	52	0.216822	0.697261	0.0260266	0.140767
KEGG;Metabolism;Glycan Biosynthesis and Metabolism;Lipopolysaccharide biosynthesis;	25	26	23	22	0.472129	0.566939	0.141138	0.14805
KEGG;Metabolism;Lipid Metabolism;	68	80	83	81	0.681896	0.813014	0.452421	0.149273
KEGG;Metabolism;Nucleotide Metabolism;Pyrimidine metabolism;	55	57	58	55	0.705027	0.778753	0.120454	0.15052
KEGG;Metabolism;Xenobiotics Biodegradation and Metabolism;Benzoate degradation via CoA ligation;	16	18	16	14	0.726325	0.609256	0.26755	0.158305
KEGG;Metabolism;Amino Acid Metabolism;Tyrosine metabolism;	24	23	23	19	0.561651	0.882692	0.0885948	0.162493
KEGG;Metabolism;Metabolism of Cofactors and Vitamins;Porphyrin and chlorophyll metabolism;	20	24	22	20	1	0.657928	0.340173	0.170838
KEGG;Metabolism;Carbohydrate Metabolism;Pyruvate metabolism;	38	42	43	40	1	0.828148	0.300522	0.181022
KEGG;Metabolism;Metabolism of Other Amino Acids;	71	73	80	75	1	0.935134	0.129835	0.182092
KEGG;Genetic Information Processing;Translation;Ribosome;	56	57	57	57	0.570187	0.706846	0.126636	0.184776
KEGG;Metabolism;Amino Acid Metabolism;Tyrosine metabolism;K00680;	3	2	0	0	0.102289	0.231736	0.0760998	0.191192
KEGG;Metabolism;Biosynthesis of Polyketides and Terpenoids;Limonene and pinene degradation;K00680;	3	2	0	0	0.102289	0.231736	0.0760998	0.191192
KEGG;Metabolism;Xenobiotics Biodegradation and Metabolism;Ethylbenzene degradation;K00680;	3	2	0	0	0.102289	0.231736	0.0760998	0.191192
KEGG;Metabolism;Xenobiotics Biodegradation and Metabolism;Benzoate degradation via CoA ligation;K00680;	3	2	0	0	0.102289	0.231736	0.0760998	0.191192
KEGG;Metabolism;Xenobiotics Biodegradation and Metabolism;1- and 2-Methylnaphthalene degradation;K00680;	3	2	0	0	0.102289	0.231736	0.0760998	0.191192
KEGG;Environmental Information Processing;Signal Transduction;Two-component system;K07804;	0	2	0	0	1	0.231736	1	0.191192
KEGG;Metabolism;Carbohydrate Metabolism;Pentose phosphate pathway;	33	38	41	36	0.727279	1	0.392857	0.197083
KEGG;Metabolism;Energy Metabolism;Oxidative phosphorylation;	44	45	47	44	0.83288	0.916686	0.159575	0.199483
KEGG;Metabolism;Carbohydrate Metabolism;Inositol phosphate metabolism;	2	2	8	8	0.116718	0.11172	0.206482	0.202232
KEGG;Metabolism;Carbohydrate Metabolism;Glyoxylate and dicarboxylate metabolism;	26	28	27	25	0.783274	0.687405	0.255646	0.211585
KEGG;Metabolism;Metabolism of Cofactors and Vitamins;Riboflavin metabolism;	8	10	8	7	0.807666	0.638902	0.439058	0.228984
KEGG;Metabolism;Lipid Metabolism;Synthesis and degradation of ketone bodies;	1	1	7	5	0.0748923	0.0717728	0.41162	0.240818
KEGG;Genetic Information Processing;Replication and Repair;DNA replication;K02314;	1	1	1	5	1	1	0.41162	0.240818
KEGG;Cellular Processes;Cell Growth and Death;Cell cycle - Caulobacter;K02314;	1	1	1	5	1	1	0.41162	0.240818
KEGG;Cellular Processes;Cell Motility;	93	68	64	106	0.00210445	0.482914	0.218922	0.247411
KEGG;Metabolism;Xenobiotics Biodegradation and Metabolism;Ethylbenzene degradation;	6	5	3	2	0.320265	0.493555	0.0783341	0.251812
KEGG;Environmental Information Processing;Signal Transduction;Two-component system;K07787;	0	0	1	3	1	1	0.267474	0.261819
KEGG;Environmental Information Processing;Signal Transduction;Two-component system;K07798;	0	0	1	3	1	1	0.267474	0.261819
KEGG;Environmental Information Processing;Signal Transduction;Two-component system;K07810;	0	0	1	3	1	1	0.267474	0.261819
KEGG;Metabolism;Carbohydrate Metabolism;Amino sugar and nucleotide sugar metabolism;	46	49	56	50	0.765369	0.769456	0.299647	0.263559
KEGG;Metabolism;Carbohydrate Metabolism;Glycolysis / Gluconeogenesis;	45	49	54	50	0.839802	0.921377	0.348438	0.263559
KEGG;Metabolism;Xenobiotics Biodegradation and Metabolism;1,4-Dichlorobenzene degradation;	3	3	1	1	0.34585	0.357394	0.317816	0.324954
KEGG;Environmental Information Processing;Membrane Transport;ABC transporters;K12368;	3	3	1	1	0.34585	0.357394	0.317816	0.324954
KEGG;Cellular Processes;Cell Motility;Bacterial chemotaxis;K12368;	3	3	1	1	0.34585	0.357394	0.317816	0.324954
KEGG;Metabolism;Carbohydrate Metabolism;Glyoxylate and dicarboxylate metabolism;K00865;	2	3	2	1	1	0.676678	0.577795	0.324954
KEGG;Metabolism;Energy Metabolism;Methane metabolism;K00865;	2	3	2	1	1	0.676678	0.577795	0.324954
KEGG;Metabolism;Lipid Metabolism;Glycerolipid metabolism;K00865;	2	3	2	1	1	0.676678	0.577795	0.324954
KEGG;Metabolism;Amino Acid Metabolism;Glycine, serine and threonine metabolism;K00865;	2	3	2	1	1	0.676678	0.577795	0.324954
KEGG;Metabolism;Amino Acid Metabolism;Lysine biosynthesis;	15	20	17	18	1	0.512257	0.727428	0.325818
KEGG;Metabolism;Lipid Metabolism;Glycerolipid metabolism;	12	14	13	12	1	0.705219	0.536192	0.326424
KEGG;Metabolism;Carbohydrate Metabolism;Butanoate metabolism;	34	36	40	37	0.907451	0.908797	0.399033	0.345708
KEGG;Genetic Information Processing;Replication and Repair;Nucleotide excision repair;	9	10	8	8	0.634844	0.638902	0.463211	0.347487
KEGG;Metabolism;Amino Acid Metabolism;Lysine biosynthesis;K01714;	2	6	3	4	1	0.328055	1	0.349423
KEGG;Environmental Information Processing;Membrane Transport;ABC transporters;K02032;	4	6	4	4	1	0.535998	0.72913	0.349423
KEGG;Environmental Information Processing;Membrane Transport;ABC transporters;K02033;	4	6	4	4	1	0.535998	0.72913	0.349423
KEGG;Environmental Information Processing;Membrane Transport;ABC transporters;K02034;	4	6	4	4	1	0.535998	0.72913	0.349423
KEGG;Environmental Information Processing;Membrane Transport;ABC transporters;K02031;	4	6	5	4	1	0.767493	0.72913	0.349423
KEGG;Metabolism;Carbohydrate Metabolism;Glycolysis / Gluconeogenesis;K01223;	6	6	6	4	1	1	0.340434	0.349423
KEGG;Metabolism;Amino Acid Metabolism;Cysteine and methionine metabolism;	39	37	40	38	0.652303	1	0.164592	0.35103
KEGG;Environmental Information Processing;Membrane Transport;Bacterial secretion system;	44	41	34	43	0.110026	0.296521	0.128145	0.377562
KEGG;Metabolism;Glycan Biosynthesis and Metabolism;Peptidoglycan biosynthesis;	24	24	24	24	0.666239	0.885082	0.307252	0.385824
KEGG;Metabolism;Lipid Metabolism;Fatty acid metabolism;	16	18	20	17	0.867683	1	0.485644	0.395603
KEGG;Metabolism;Amino Acid Metabolism;Alanine, aspartate and glutamate metabolism;	27	26	28	26	0.786885	1	0.21275	0.401369
KEGG;Metabolism;Xenobiotics Biodegradation and Metabolism;gamma-Hexachlorocyclohexane degradation;	3	4	3	2	1	0.717454	0.656312	0.414289
KEGG;Genetic Information Processing;Replication and Repair;	57	60	55	66	0.392558	0.399385	0.408827	0.416224
KEGG;Environmental Information Processing;Membrane Transport;ABC transporters;K02035;	7	8	6	6	0.782356	0.596728	0.414808	0.420054
KEGG;Metabolism;Metabolism of Cofactors and Vitamins;Folate biosynthesis;	12	13	12	12	0.838727	0.841681	0.536192	0.425458
KEGG;Metabolism;Biosynthesis of Other Secondary Metabolites;	19	20	23	20	0.877968	0.87924	0.422627	0.429584
KEGG;Cellular Processes;Cell Growth and Death;Cell cycle - Caulobacter;K13590;	2	1	0	0	0.218689	0.481361	0.179554	0.437226
KEGG;Metabolism;Carbohydrate Metabolism;Fructose and mannose metabolism;K01112;	1	1	0	0	0.467612	0.481361	0.423708	0.437226
KEGG;Metabolism;Carbohydrate Metabolism;Amino sugar and nucleotide sugar metabolism;K12454;	1	1	0	0	0.467612	0.481361	0.423708	0.437226
KEGG;Metabolism;Carbohydrate Metabolism;Pyruvate metabolism;K07248;	1	1	0	0	0.467612	0.481361	0.423708	0.437226
KEGG;Metabolism;Carbohydrate Metabolism;Glyoxylate and dicarboxylate metabolism;K07248;	1	1	0	0	0.467612	0.481361	0.423708	0.437226
KEGG;Metabolism;Amino Acid Metabolism;Alanine, aspartate and glutamate metabolism;K01779;	1	1	0	0	0.467612	0.481361	0.423708	0.437226
KEGG;Metabolism;Amino Acid Metabolism;Phenylalanine metabolism;K01451;	1	1	0	0	0.467612	0.481361	0.423708	0.437226
KEGG;Metabolism;Glycan Biosynthesis and Metabolism;Other glycan degradation;K01192;	1	1	0	0	0.467612	0.481361	0.423708	0.437226
KEGG;Metabolism;Metabolism of Cofactors and Vitamins;Thiamine metabolism;K01112;	1	1	0	0	0.467612	0.481361	0.423708	0.437226
KEGG;Metabolism;Metabolism of Cofactors and Vitamins;Riboflavin metabolism;K01112;	1	1	0	0	0.467612	0.481361	0.423708	0.437226
KEGG;Metabolism;Xenobiotics Biodegradation and Metabolism;Toluene and xylene degradation;	1	1	0	0	0.467612	0.481361	0.423708	0.437226
KEGG;Metabolism;Xenobiotics Biodegradation and Metabolism;Toluene and xylene degradation;K00446;	1	1	0	0	0.467612	0.481361	0.423708	0.437226
KEGG;Metabolism;Xenobiotics Biodegradation and Metabolism;Styrene degradation;K00446;	1	1	0	0	0.467612	0.481361	0.423708	0.437226
KEGG;Metabolism;Xenobiotics Biodegradation and Metabolism;1,4-Dichlorobenzene degradation;K00446;	1	1	0	0	0.467612	0.481361	0.423708	0.437226
KEGG;Metabolism;Xenobiotics Biodegradation and Metabolism;Carbazole degradation;	1	1	0	0	0.467612	0.481361	0.423708	0.437226
KEGG;Metabolism;Xenobiotics Biodegradation and Metabolism;Carbazole degradation;K00446;	1	1	0	0	0.467612	0.481361	0.423708	0.437226
KEGG;Metabolism;Xenobiotics Biodegradation and Metabolism;Benzoate degradation via hydroxylation;K00446;	1	1	0	0	0.467612	0.481361	0.423708	0.437226
KEGG;Environmental Information Processing;Membrane Transport;ABC transporters;K10559;	1	1	0	0	0.467612	0.481361	0.423708	0.437226
KEGG;Environmental Information Processing;Membrane Transport;ABC transporters;K10560;	1	1	0	0	0.467612	0.481361	0.423708	0.437226
KEGG;Environmental Information Processing;Membrane Transport;ABC transporters;K10561;	1	1	0	0	0.467612	0.481361	0.423708	0.437226
KEGG;Environmental Information Processing;Membrane Transport;ABC transporters;K10562;	1	1	0	0	0.467612	0.481361	0.423708	0.437226
KEGG;Environmental Information Processing;Membrane Transport;Bacterial secretion system;K03219;	1	1	0	0	0.467612	0.481361	0.423708	0.437226
KEGG;Cellular Processes;Transport and Catabolism;Lysosome;K01192;	1	1	0	0	0.467612	0.481361	0.423708	0.437226
KEGG;Metabolism;Carbohydrate Metabolism;Glycolysis / Gluconeogenesis;K00016;	0	1	0	0	1	0.481361	1	0.437226
KEGG;Metabolism;Carbohydrate Metabolism;Pentose phosphate pathway;K06151;	0	1	0	0	1	0.481361	1	0.437226
KEGG;Metabolism;Carbohydrate Metabolism;Pentose phosphate pathway;K06152;	0	1	0	0	1	0.481361	1	0.437226
KEGG;Metabolism;Carbohydrate Metabolism;Pentose and glucuronate interconversions;K01731;	0	1	0	0	1	0.481361	1	0.437226
KEGG;Metabolism;Carbohydrate Metabolism;Fructose and mannose metabolism;K00966;	0	1	0	0	1	0.481361	1	0.437226
KEGG;Metabolism;Carbohydrate Metabolism;Fructose and mannose metabolism;K01729;	0	1	0	0	1	0.481361	1	0.437226
KEGG;Metabolism;Carbohydrate Metabolism;Fructose and mannose metabolism;K02798;	0	1	0	0	1	0.481361	1	0.437226
KEGG;Metabolism;Carbohydrate Metabolism;Amino sugar and nucleotide sugar metabolism;K00966;	0	1	0	0	1	0.481361	1	0.437226
KEGG;Metabolism;Carbohydrate Metabolism;Pyruvate metabolism;K00016;	0	1	0	0	1	0.481361	1	0.437226
KEGG;Metabolism;Carbohydrate Metabolism;Glyoxylate and dicarboxylate metabolism;K00015;	0	1	0	0	1	0.481361	1	0.437226
KEGG;Metabolism;Carbohydrate Metabolism;Propanoate metabolism;K00016;	0	1	0	0	1	0.481361	1	0.437226
KEGG;Metabolism;Energy Metabolism;Nitrogen metabolism;K01667;	0	1	0	0	1	0.481361	1	0.437226
KEGG;Metabolism;Lipid Metabolism;Linoleic acid metabolism;K00508;	0	1	0	0	1	0.481361	1	0.437226
KEGG;Metabolism;Nucleotide Metabolism;Purine metabolism;K08693;	0	1	0	0	1	0.481361	1	0.437226
KEGG;Metabolism;Nucleotide Metabolism;Purine metabolism;K10213;	0	1	0	0	1	0.481361	1	0.437226
KEGG;Metabolism;Nucleotide Metabolism;Purine metabolism;K11177;	0	1	0	0	1	0.481361	1	0.437226
KEGG;Metabolism;Nucleotide Metabolism;Purine metabolism;K11178;	0	1	0	0	1	0.481361	1	0.437226
KEGG;Metabolism;Nucleotide Metabolism;Purine metabolism;K13483;	0	1	0	0	1	0.481361	1	0.437226
KEGG;Metabolism;Nucleotide Metabolism;Pyrimidine metabolism;K01431;	0	1	0	0	1	0.481361	1	0.437226
KEGG;Metabolism;Nucleotide Metabolism;Pyrimidine metabolism;K08693;	0	1	0	0	1	0.481361	1	0.437226
KEGG;Metabolism;Nucleotide Metabolism;Pyrimidine metabolism;K10213;	0	1	0	0	1	0.481361	1	0.437226
KEGG;Metabolism;Amino Acid Metabolism;Cysteine and methionine metabolism;K00016;	0	1	0	0	1	0.481361	1	0.437226
KEGG;Metabolism;Amino Acid Metabolism;Arginine and proline metabolism;K01476;	0	1	0	0	1	0.481361	1	0.437226
KEGG;Metabolism;Amino Acid Metabolism;Tryptophan metabolism;K01667;	0	1	0	0	1	0.481361	1	0.437226
KEGG;Metabolism;Metabolism of Other Amino Acids;beta-Alanine metabolism;K01431;	0	1	0	0	1	0.481361	1	0.437226
KEGG;Metabolism;Glycan Biosynthesis and Metabolism;Lipopolysaccharide biosynthesis;K02848;	0	1	0	0	1	0.481361	1	0.437226
KEGG;Metabolism;Glycan Biosynthesis and Metabolism;Lipopolysaccharide biosynthesis;K02850;	0	1	0	0	1	0.481361	1	0.437226
KEGG;Metabolism;Glycan Biosynthesis and Metabolism;Lipopolysaccharide biosynthesis;K03275;	0	1	0	0	1	0.481361	1	0.437226
KEGG;Metabolism;Glycan Biosynthesis and Metabolism;Lipopolysaccharide biosynthesis;K03279;	0	1	0	0	1	0.481361	1	0.437226
KEGG;Metabolism;Glycan Biosynthesis and Metabolism;Lipopolysaccharide biosynthesis;K03280;	0	1	0	0	1	0.481361	1	0.437226
KEGG;Metabolism;Metabolism of Cofactors and Vitamins;Riboflavin metabolism;K00768;	0	1	0	0	1	0.481361	1	0.437226
KEGG;Metabolism;Metabolism of Cofactors and Vitamins;Riboflavin metabolism;K02226;	0	1	0	0	1	0.481361	1	0.437226
KEGG;Metabolism;Metabolism of Cofactors and Vitamins;Vitamin B6 metabolism;K05275;	0	1	0	0	1	0.481361	1	0.437226
KEGG;Metabolism;Metabolism of Cofactors and Vitamins;Pantothenate and CoA biosynthesis;K01431;	0	1	0	0	1	0.481361	1	0.437226
KEGG;Metabolism;Metabolism of Cofactors and Vitamins;Porphyrin and chlorophyll metabolism;K00768;	0	1	0	0	1	0.481361	1	0.437226
KEGG;Metabolism;Metabolism of Cofactors and Vitamins;Porphyrin and chlorophyll metabolism;K02226;	0	1	0	0	1	0.481361	1	0.437226
KEGG;Metabolism;Metabolism of Cofactors and Vitamins;Porphyrin and chlorophyll metabolism;K02231;	0	1	0	0	1	0.481361	1	0.437226
KEGG;Metabolism;Metabolism of Cofactors and Vitamins;Porphyrin and chlorophyll metabolism;K02232;	0	1	0	0	1	0.481361	1	0.437226
KEGG;Metabolism;Metabolism of Cofactors and Vitamins;Porphyrin and chlorophyll metabolism;K02233;	0	1	0	0	1	0.481361	1	0.437226
KEGG;Metabolism;Biosynthesis of Polyketides and Terpenoids;Terpenoid backbone biosynthesis;K13789;	0	1	0	0	1	0.481361	1	0.437226
KEGG;Metabolism;Biosynthesis of Polyketides and Terpenoids;Carotenoid biosynthesis;K02291;	0	1	0	0	1	0.481361	1	0.437226
KEGG;Metabolism;Biosynthesis of Polyketides and Terpenoids;Carotenoid biosynthesis;K06443;	0	1	0	0	1	0.481361	1	0.437226
KEGG;Metabolism;Biosynthesis of Polyketides and Terpenoids;Carotenoid biosynthesis;K10027;	0	1	0	0	1	0.481361	1	0.437226
KEGG;Metabolism;Xenobiotics Biodegradation and Metabolism;Drug metabolism - other enzymes;K01431;	0	1	0	0	1	0.481361	1	0.437226
KEGG;Environmental Information Processing;Membrane Transport;ABC transporters;K02193;	0	1	0	0	1	0.481361	1	0.437226
KEGG;Environmental Information Processing;Membrane Transport;ABC transporters;K02194;	0	1	0	0	1	0.481361	1	0.437226
KEGG;Environmental Information Processing;Membrane Transport;ABC transporters;K02195;	0	1	0	0	1	0.481361	1	0.437226
KEGG;Environmental Information Processing;Membrane Transport;ABC transporters;K02196;	0	1	0	0	1	0.481361	1	0.437226
KEGG;Environmental Information Processing;Membrane Transport;Phosphotransferase system (PTS);K02798;	0	1	0	0	1	0.481361	1	0.437226
KEGG;Environmental Information Processing;Membrane Transport;Bacterial secretion system;K11912;	0	1	0	0	1	0.481361	1	0.437226
KEGG;Environmental Information Processing;Signal Transduction;Two-component system;K02488;	0	1	0	0	1	0.481361	1	0.437226
KEGG;Environmental Information Processing;Signal Transduction;Two-component system;K10125;	0	1	0	0	1	0.481361	1	0.437226
KEGG;Cellular Processes;Cell Growth and Death;Cell cycle - Caulobacter;K02488;	0	1	0	0	1	0.481361	1	0.437226
KEGG;Metabolism;Metabolism of Cofactors and Vitamins;Folate biosynthesis;K01077;	0	1	1	0	1	1	1	0.437226
KEGG;Metabolism;Xenobiotics Biodegradation and Metabolism;gamma-Hexachlorocyclohexane degradation;K01077;	0	1	1	0	1	1	1	0.437226
KEGG;Metabolism;Xenobiotics Biodegradation and Metabolism;Benzoate degradation via hydroxylation;K01607;	0	1	1	0	1	1	1	0.437226
KEGG;Environmental Information Processing;Signal Transduction;Two-component system;K01077;	0	1	1	0	1	1	1	0.437226
KEGG;Environmental Information Processing;Signal Transduction;Two-component system;K07641;	0	1	1	0	1	1	1	0.437226
KEGG;Environmental Information Processing;Signal Transduction;Two-component system;K07663;	0	1	1	0	1	1	1	0.437226
KEGG;Metabolism;Metabolism of Cofactors and Vitamins;Thiamine metabolism;	14	14	14	13	0.850035	0.852389	0.335162	0.439981
KEGG;Metabolism;Energy Metabolism;Methane metabolism;	40	41	45	44	1	1	0.375209	0.442536
KEGG;Genetic Information Processing;Replication and Repair;Base excision repair;	15	15	14	14	0.710034	0.714086	0.348796	0.45448
KEGG;Metabolism;Energy Metabolism;Carbon fixation in photosynthetic organisms;	21	23	27	23	0.772188	0.778687	0.541405	0.456833
KEGG;Metabolism;Carbohydrate Metabolism;Ascorbate and aldarate metabolism;	16	11	19	19	1	0.272166	0.733327	0.467366
KEGG;Genetic Information Processing;Folding, Sorting and Degradation;	33	34	33	36	0.622007	0.71355	0.392857	0.468514
KEGG;Metabolism;Amino Acid Metabolism;Histidine metabolism;	15	16	16	15	0.859209	0.860963	0.460464	0.468833
KEGG;Metabolism;Xenobiotics Biodegradation and Metabolism;Drug metabolism - cytochrome P450;	6	9	7	8	1	0.619503	1	0.471517
KEGG;Cellular Processes;Transport and Catabolism;	10	9	8	8	0.486563	0.809569	0.340093	0.471517
KEGG;Metabolism;Lipid Metabolism;Glycerophospholipid metabolism;	25	24	24	25	0.568696	0.885082	0.31567	0.473454
KEGG;Genetic Information Processing;Folding, Sorting and Degradation;RNA degradation;	15	16	15	16	0.719069	0.722244	0.585796	0.481259
KEGG;Metabolism;Metabolism of Other Amino Acids;Cyanoamino acid metabolism;	9	10	11	9	1	1	0.634361	0.491394
KEGG;Metabolism;Xenobiotics Biodegradation and Metabolism;Drug metabolism - other enzymes;	9	10	10	9	1	1	0.634361	0.491394
KEGG;Genetic Information Processing;Translation;Aminoacyl-tRNA biosynthesis;	27	27	30	29	1	1	0.416639	0.502793
KEGG;Environmental Information Processing;Signal Transduction;Two-component system;	125	118	131	166	0.525552	0.84715	0.856766	0.504518
KEGG;Metabolism;Carbohydrate Metabolism;Fructose and mannose metabolism;K02783;	0	0	3	2	0.253104	0.250983	0.511635	0.507868
KEGG;Environmental Information Processing;Membrane Transport;Phosphotransferase system (PTS);K02783;	0	0	3	2	0.253104	0.250983	0.511635	0.507868
KEGG;Genetic Information Processing;Translation;Aminoacyl-tRNA biosynthesis;K02433;	0	0	2	2	0.502063	0.500651	0.511635	0.507868
KEGG;Organismal Systems;Environmental Adaptation;Plant-pathogen interaction;K02358;	0	0	2	2	0.502063	0.500651	0.511635	0.507868
KEGG;Metabolism;Amino Acid Metabolism;Arginine and proline metabolism;K01478;	1	0	1	2	1	1	1	0.507868
KEGG;Metabolism;Metabolism of Cofactors and Vitamins;Vitamin B6 metabolism;	9	11	9	10	0.816831	0.655687	0.65114	0.510512
KEGG;Metabolism;Amino Acid Metabolism;Phenylalanine metabolism;	12	11	10	10	0.524586	0.827752	0.283268	0.510512
KEGG;Metabolism;Metabolism of Cofactors and Vitamins;Nicotinate and nicotinamide metabolism;	19	19	19	19	0.745786	0.871549	0.411241	0.512876
KEGG;Metabolism;Metabolism of Cofactors and Vitamins;Ubiquinone and other terpenoid-quinone biosynthesis;	20	19	20	19	0.751603	1	0.261465	0.512876
KEGG;Genetic Information Processing;Replication and Repair;Homologous recombination;	28	29	26	31	0.495272	0.502392	0.431396	0.514855
KEGG;Metabolism;Metabolism of Other Amino Acids;D-Alanine metabolism;	5	5	4	4	0.742212	0.746033	0.507644	0.516879
KEGG;Environmental Information Processing;Membrane Transport;ABC transporters;K01999;	4	5	4	4	1	0.746033	0.72913	0.516879
KEGG;Metabolism;Energy Metabolism;Nitrogen metabolism;	34	32	35	35	0.717096	1	0.271807	0.537801
KEGG;Cellular Processes;	118	92	85	130	0.00168531	0.323974	0.104108	0.538156
KEGG;Metabolism;Metabolism of Other Amino Acids;Glutathione metabolism;	21	22	26	23	0.883692	0.77406	0.541405	0.547651
KEGG;Metabolism;Amino Acid Metabolism;Phenylalanine, tyrosine and tryptophan biosynthesis;	22	22	23	23	0.881161	1	0.450012	0.547651
KEGG;Metabolism;Metabolism of Cofactors and Vitamins;Pantothenate and CoA biosynthesis;	22	22	23	23	0.881161	1	0.450012	0.547651
KEGG;Metabolism;Xenobiotics Biodegradation and Metabolism;3-Chloroacrylic acid degradation;	4	6	5	5	1	0.767493	1	0.549684
KEGG;Metabolism;Biosynthesis of Other Secondary Metabolites;Phenylpropanoid biosynthesis;	5	6	6	5	1	1	0.751943	0.549684
KEGG;Metabolism;Metabolism of Other Amino Acids;beta-Alanine metabolism;	11	13	13	13	1	0.847508	0.836797	0.556449
KEGG;Metabolism;Biosynthesis of Polyketides and Terpenoids;Terpenoid backbone biosynthesis;	12	13	16	13	0.709014	0.852804	0.686089	0.556449
KEGG;Metabolism;Amino Acid Metabolism;Glycine, serine and threonine metabolism;	39	35	38	39	0.566578	1	0.205514	0.557842
KEGG;Metabolism;Energy Metabolism;Sulfur metabolism;	14	14	14	14	0.850035	0.852389	0.447261	0.568883
KEGG;Metabolism;Metabolism of Cofactors and Vitamins;One carbon pool by folate;	14	14	15	14	1	1	0.447261	0.568883
KEGG;Human Diseases;	27	25	28	27	0.786885	1	0.271424	0.576004
KEGG;Metabolism;Amino Acid Metabolism;Lysine degradation;	15	11	17	18	1	0.449357	0.727428	0.578463
KEGG;Environmental Information Processing;Membrane Transport;ABC transporters;K02016;	7	7	5	6	0.565119	0.569462	0.414808	0.578527
KEGG;Metabolism;Xenobiotics Biodegradation and Metabolism;Geraniol degradation;	7	7	7	6	1	1	0.414808	0.578527
KEGG;Cellular Processes;Transport and Catabolism;Lysosome;	3	2	1	1	0.34585	0.611517	0.317816	0.584527
KEGG;Metabolism;Carbohydrate Metabolism;Pentose phosphate pathway;K00117;	2	2	1	1	0.602338	0.611517	0.577795	0.584527
KEGG;Metabolism;Carbohydrate Metabolism;Starch and sucrose metabolism;K00694;	2	2	1	1	0.602338	0.611517	0.577795	0.584527
KEGG;Metabolism;Nucleotide Metabolism;Purine metabolism;K01129;	2	2	1	1	0.602338	0.611517	0.577795	0.584527
KEGG;Metabolism;Nucleotide Metabolism;Purine metabolism;K01515;	2	2	1	1	0.602338	0.611517	0.577795	0.584527
KEGG;Metabolism;Nucleotide Metabolism;Purine metabolism;K02335;	2	2	1	1	0.602338	0.611517	0.577795	0.584527
KEGG;Metabolism;Nucleotide Metabolism;Pyrimidine metabolism;K01591;	2	2	1	1	0.602338	0.611517	0.577795	0.584527
KEGG;Metabolism;Nucleotide Metabolism;Pyrimidine metabolism;K02335;	2	2	1	1	0.602338	0.611517	0.577795	0.584527
KEGG;Metabolism;Xenobiotics Biodegradation and Metabolism;gamma-Hexachlorocyclohexane degradation;K01061;	2	2	1	1	0.602338	0.611517	0.577795	0.584527
KEGG;Metabolism;Xenobiotics Biodegradation and Metabolism;Styrene degradation;	2	2	1	1	0.602338	0.611517	0.577795	0.584527
KEGG;Metabolism;Xenobiotics Biodegradation and Metabolism;1,4-Dichlorobenzene degradation;K01061;	2	2	1	1	0.602338	0.611517	0.577795	0.584527
KEGG;Metabolism;Xenobiotics Biodegradation and Metabolism;Fluorobenzoate degradation;	2	2	1	1	0.602338	0.611517	0.577795	0.584527
KEGG;Metabolism;Xenobiotics Biodegradation and Metabolism;Fluorobenzoate degradation;K01061;	2	2	1	1	0.602338	0.611517	0.577795	0.584527
KEGG;Genetic Information Processing;Translation;Ribosome;K02874;	2	2	1	1	0.602338	0.611517	0.577795	0.584527
KEGG;Genetic Information Processing;Translation;Ribosome;K02961;	2	2	1	1	0.602338	0.611517	0.577795	0.584527
KEGG;Genetic Information Processing;Replication and Repair;DNA replication;K02335;	2	2	1	1	0.602338	0.611517	0.577795	0.584527
KEGG;Genetic Information Processing;Replication and Repair;Base excision repair;K02335;	2	2	1	1	0.602338	0.611517	0.577795	0.584527
KEGG;Genetic Information Processing;Replication and Repair;Nucleotide excision repair;K02335;	2	2	1	1	0.602338	0.611517	0.577795	0.584527
KEGG;Genetic Information Processing;Replication and Repair;Homologous recombination;K02335;	2	2	1	1	0.602338	0.611517	0.577795	0.584527
KEGG;Metabolism;Carbohydrate Metabolism;Glycolysis / Gluconeogenesis;K00001;	1	2	1	1	1	0.611517	1	0.584527
KEGG;Metabolism;Carbohydrate Metabolism;Pentose and glucuronate interconversions;K01730;	1	2	1	1	1	0.611517	1	0.584527
KEGG;Metabolism;Carbohydrate Metabolism;Fructose and mannose metabolism;K00971;	1	2	1	1	1	0.611517	1	0.584527
KEGG;Metabolism;Carbohydrate Metabolism;Fructose and mannose metabolism;K01711;	1	2	1	1	1	0.611517	1	0.584527
KEGG;Metabolism;Carbohydrate Metabolism;Fructose and mannose metabolism;K01840;	1	2	1	1	1	0.611517	1	0.584527
KEGG;Metabolism;Carbohydrate Metabolism;Fructose and mannose metabolism;K02377;	1	2	1	1	1	0.611517	1	0.584527
KEGG;Metabolism;Carbohydrate Metabolism;Fructose and mannose metabolism;K02800;	1	2	1	1	1	0.611517	1	0.584527
KEGG;Metabolism;Carbohydrate Metabolism;Galactose metabolism;K00883;	1	2	1	1	1	0.611517	1	0.584527
KEGG;Metabolism;Carbohydrate Metabolism;Galactose metabolism;K01631;	1	2	1	1	1	0.611517	1	0.584527
KEGG;Metabolism;Carbohydrate Metabolism;Galactose metabolism;K01684;	1	2	1	1	1	0.611517	1	0.584527
KEGG;Metabolism;Carbohydrate Metabolism;Ascorbate and aldarate metabolism;K01706;	1	2	1	1	1	0.611517	1	0.584527
KEGG;Metabolism;Carbohydrate Metabolism;Amino sugar and nucleotide sugar metabolism;K00971;	1	2	1	1	1	0.611517	1	0.584527
KEGG;Metabolism;Carbohydrate Metabolism;Amino sugar and nucleotide sugar metabolism;K01209;	1	2	1	1	1	0.611517	1	0.584527
KEGG;Metabolism;Carbohydrate Metabolism;Amino sugar and nucleotide sugar metabolism;K01711;	1	2	1	1	1	0.611517	1	0.584527
KEGG;Metabolism;Carbohydrate Metabolism;Amino sugar and nucleotide sugar metabolism;K01791;	1	2	1	1	1	0.611517	1	0.584527
KEGG;Metabolism;Carbohydrate Metabolism;Amino sugar and nucleotide sugar metabolism;K01840;	1	2	1	1	1	0.611517	1	0.584527
KEGG;Metabolism;Carbohydrate Metabolism;Amino sugar and nucleotide sugar metabolism;K02377;	1	2	1	1	1	0.611517	1	0.584527
KEGG;Metabolism;Lipid Metabolism;Fatty acid metabolism;K00001;	1	2	1	1	1	0.611517	1	0.584527
KEGG;Metabolism;Amino Acid Metabolism;Tyrosine metabolism;K00001;	1	2	1	1	1	0.611517	1	0.584527
[truncated: 2,102 more rows]

## Sheet: Table S12C
Table S12C. SEED comparison summary for CPCRI-2 vs non-PGPRs ( Pseudomonas putida S16)
[truncated: 2,416 more rows]

[truncated: 6 more sheets: Table S12D, Table S12E, Table S12F, Table S12G, Table S12H, Table S12I]
